# Supplementary material for: Migration Testing of GPPS and HIPS Polymers: Swelling Effect Caused by Food Simulants Compared to Real Foods
Source: MDPI journal article supplement (doi:10.3390/molecules27030823), 2022-01-26

*Article*

# **Migration testing of GPPS and HIPS polymers: swelling effect caused by food simulants compared to real foods**

**Valeria Guazzotti \*, Anita Gruner, Mladen Juric, Veronika Hendrich, Angela Störmer and Frank Welle**

Fraunhofer Institute for Process Engineering and Packaging, IVV, Giggenhauser Straße 35, 85354 Freising, Germany

\*correspondence: [valeria.guazzotti@ivv.fraunhofer.de](mailto:valeria.guazzotti@ivv.fraunhofer.de)

## **Supplementary material -2 (Visual changes)**

In addition to the analytical determination of the weight increase and of the migration kinetics from GPPS and HIPS polymers after contact with different food and food simulants at several time-temperature testing conditions, at most kinetic time points photos were taken to document visual changes of the sample material.

For a better comparison, an original GPPS or HIPS strip (marked with a black ring) was put next to the test strip in all photos.

## GPPS (general purpose polystyrene)

### 1 Contact with Isooctane

#### 1.1 Isooctane at 60 °C

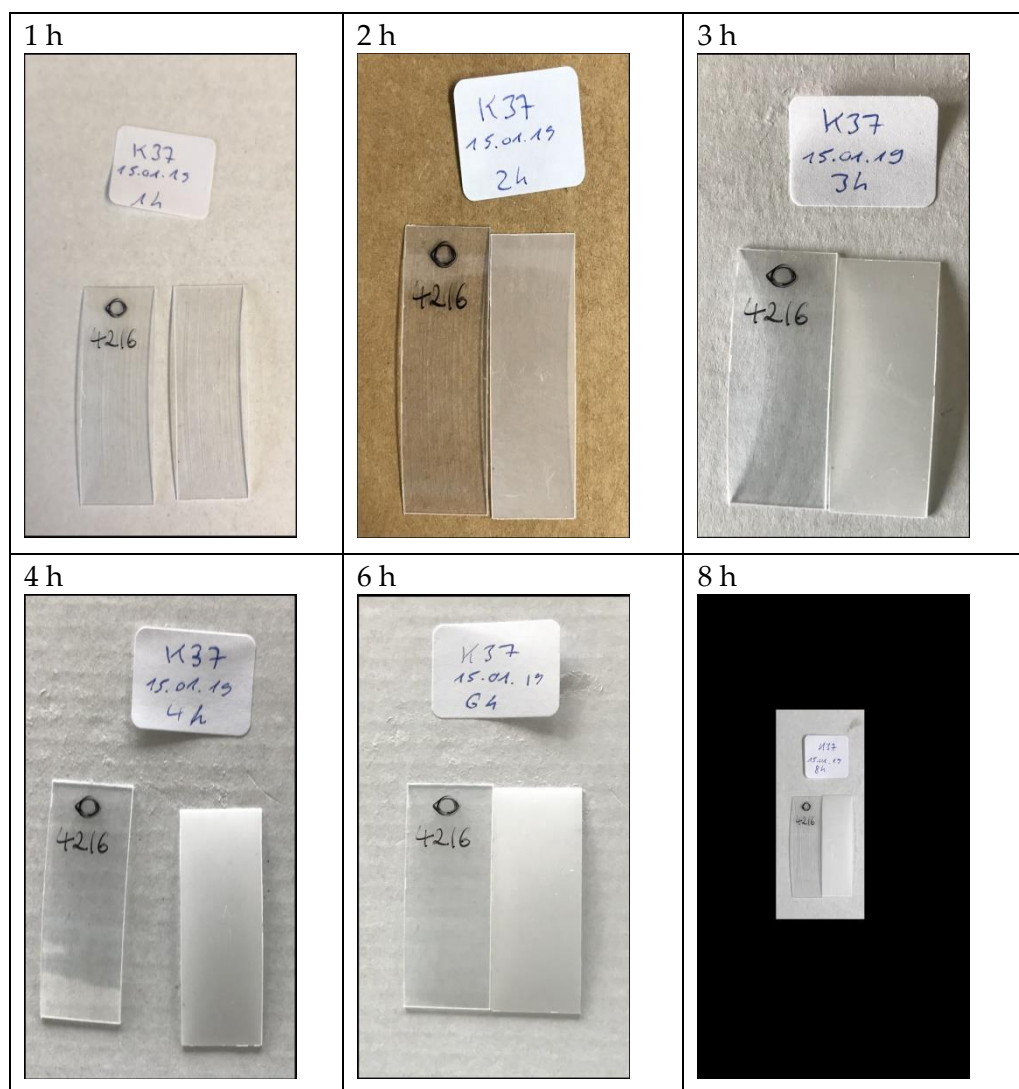

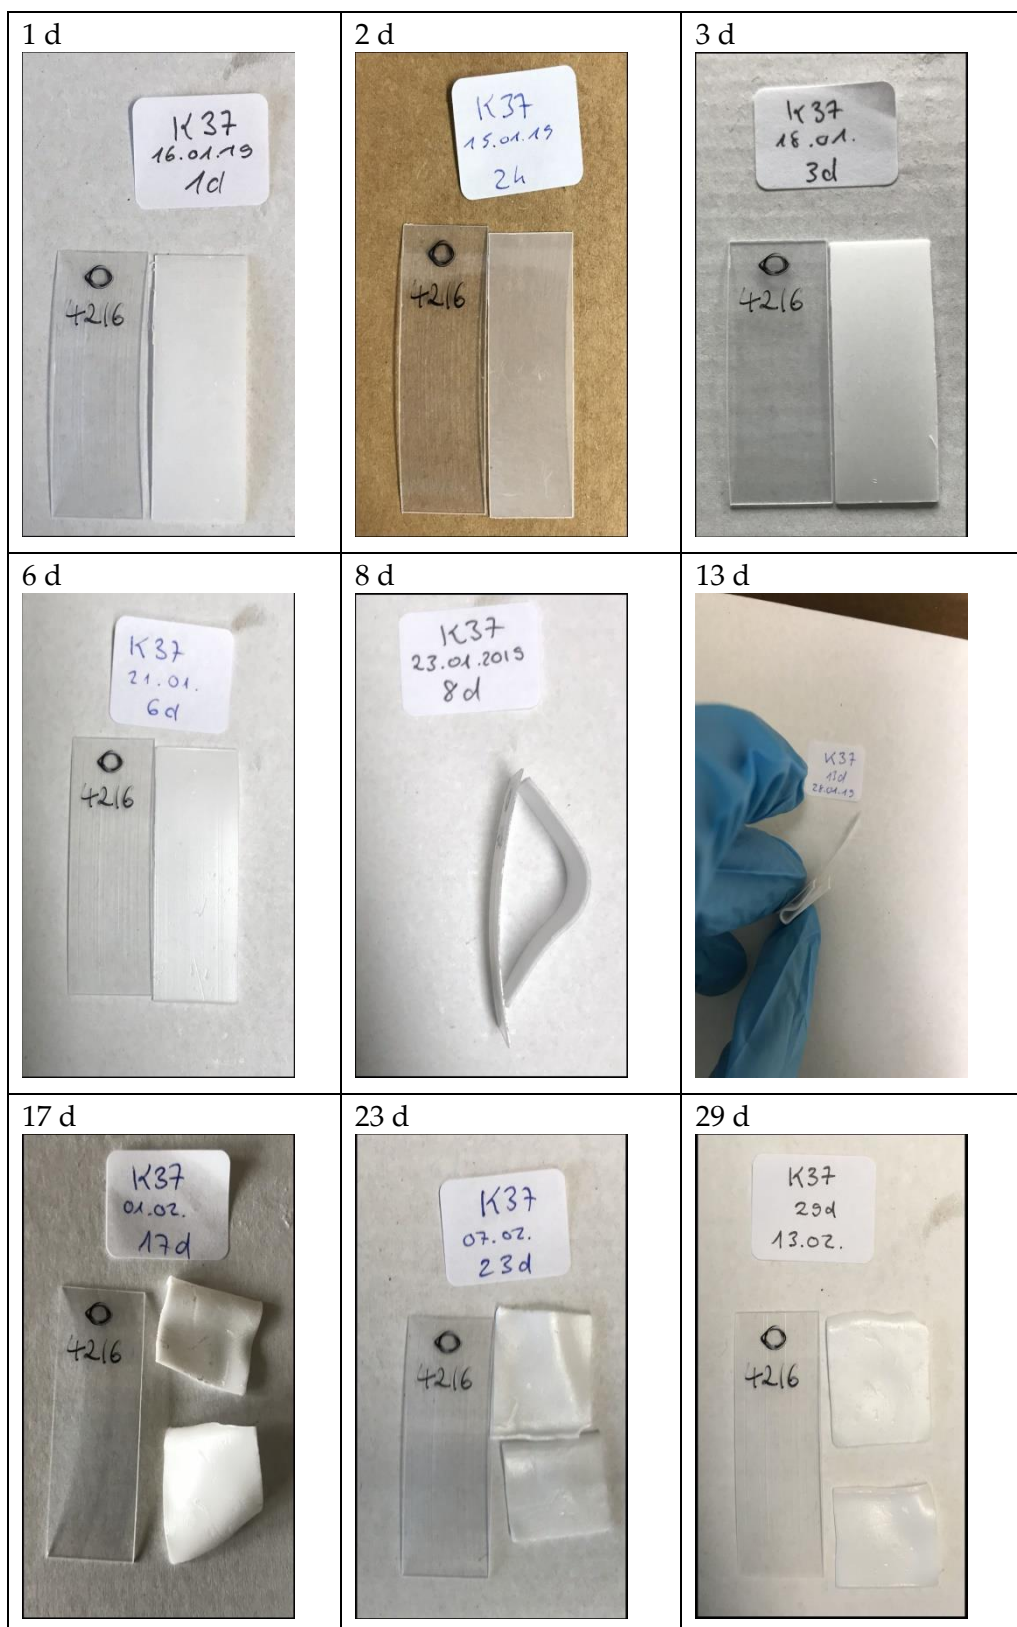



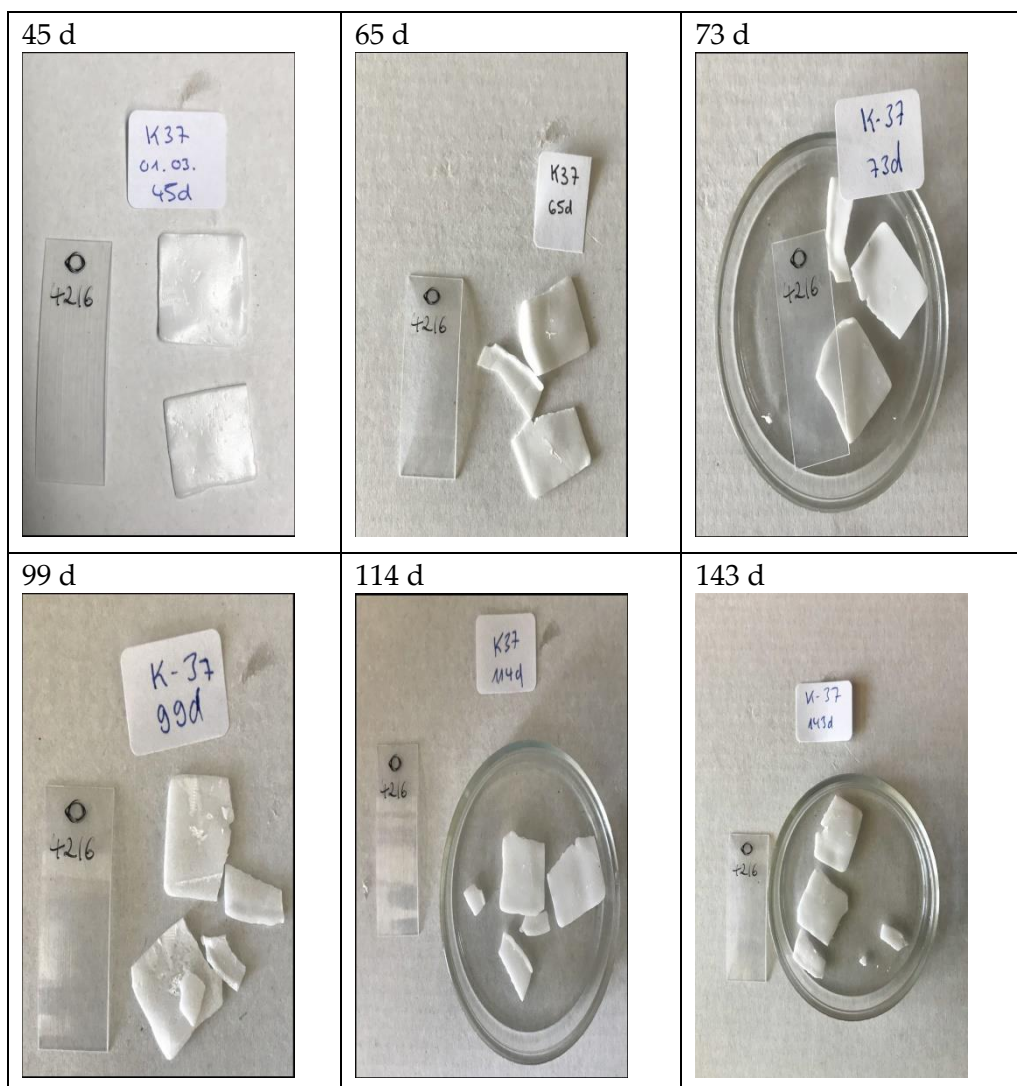

## 1.2 Isooctane at 40 °C

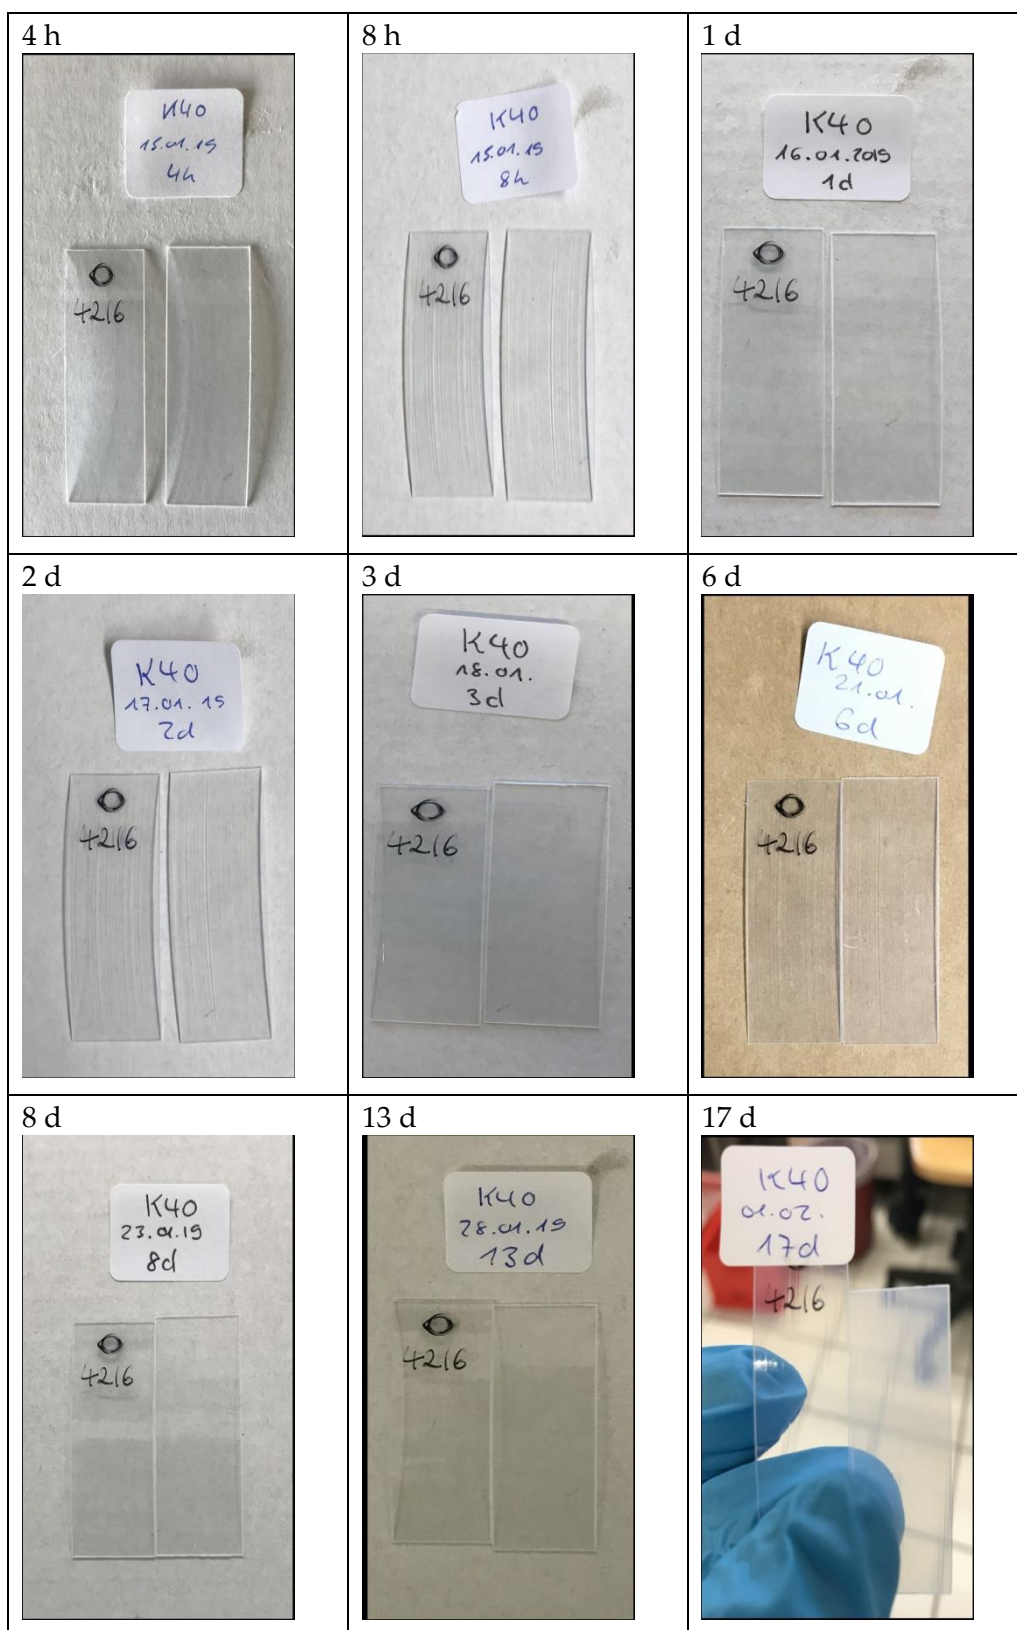

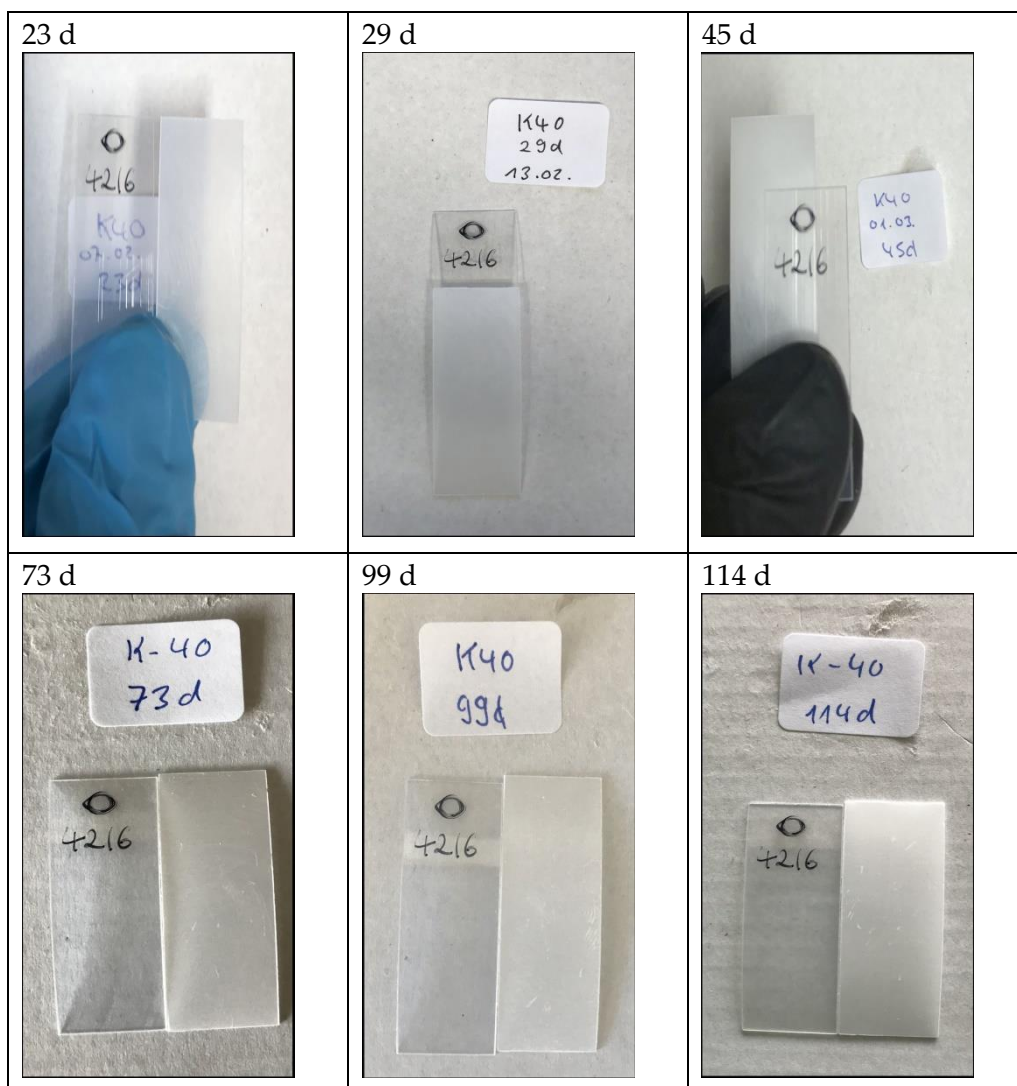

### 1.3 Isooctane at 20 °C

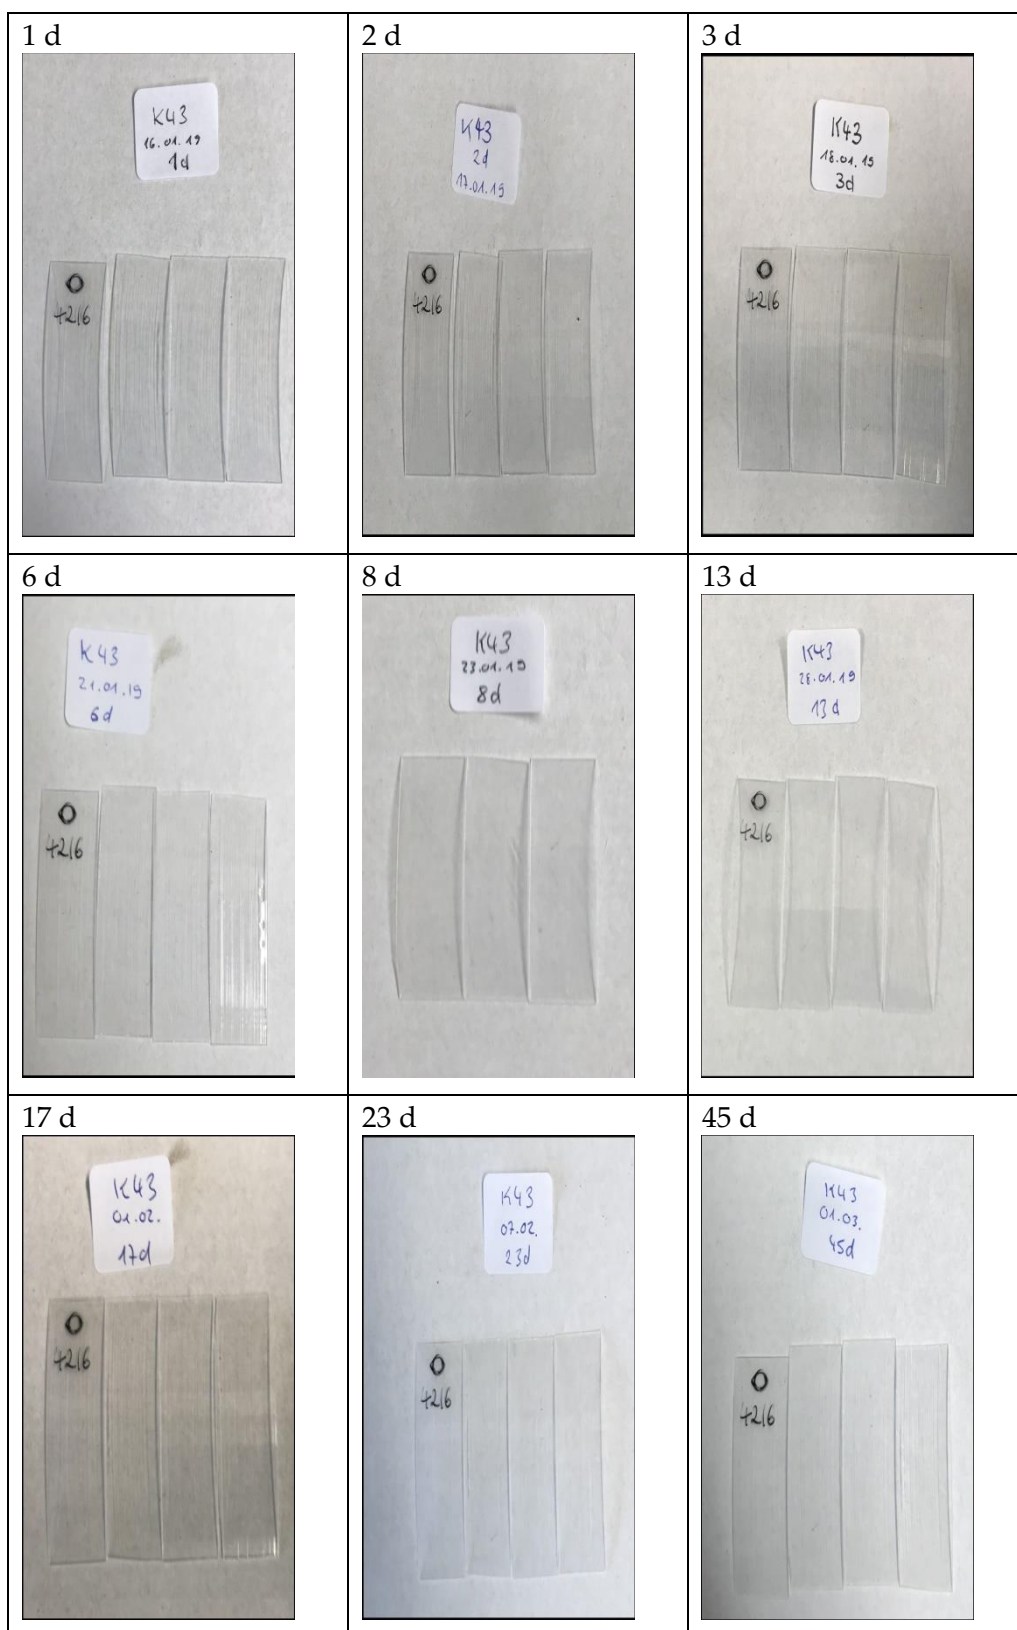

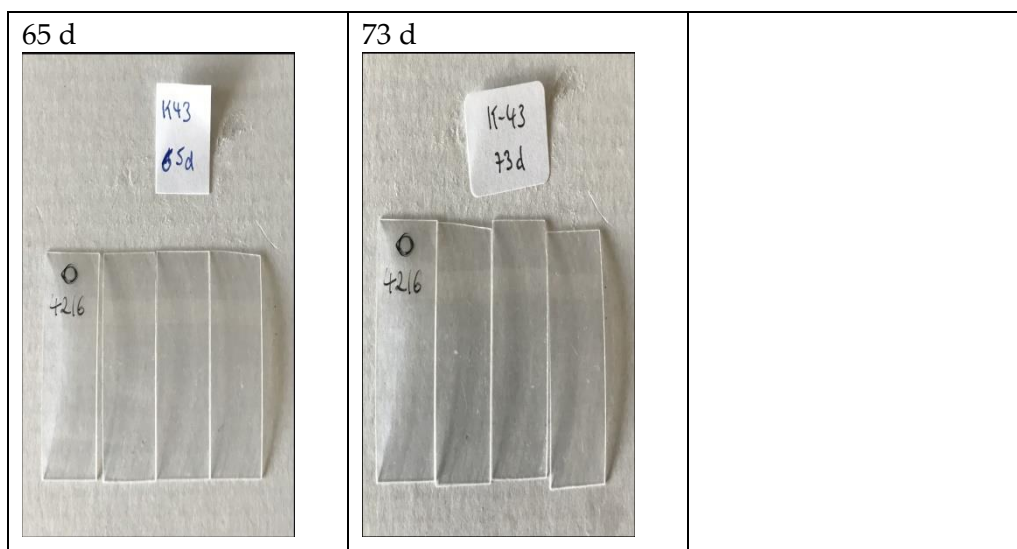



## 2 Contact with 95% Ethanol

### 2.1 95% Ethanol at 60 °C

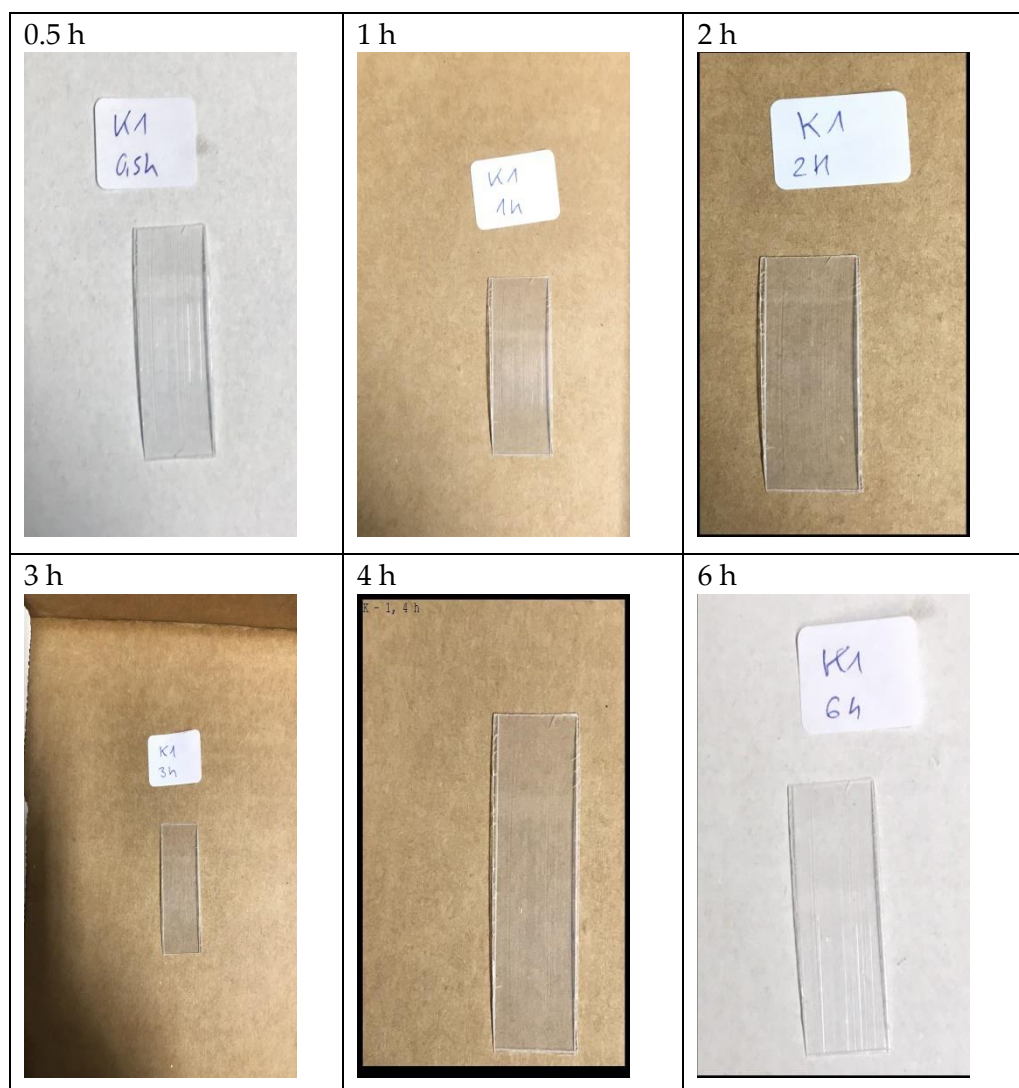

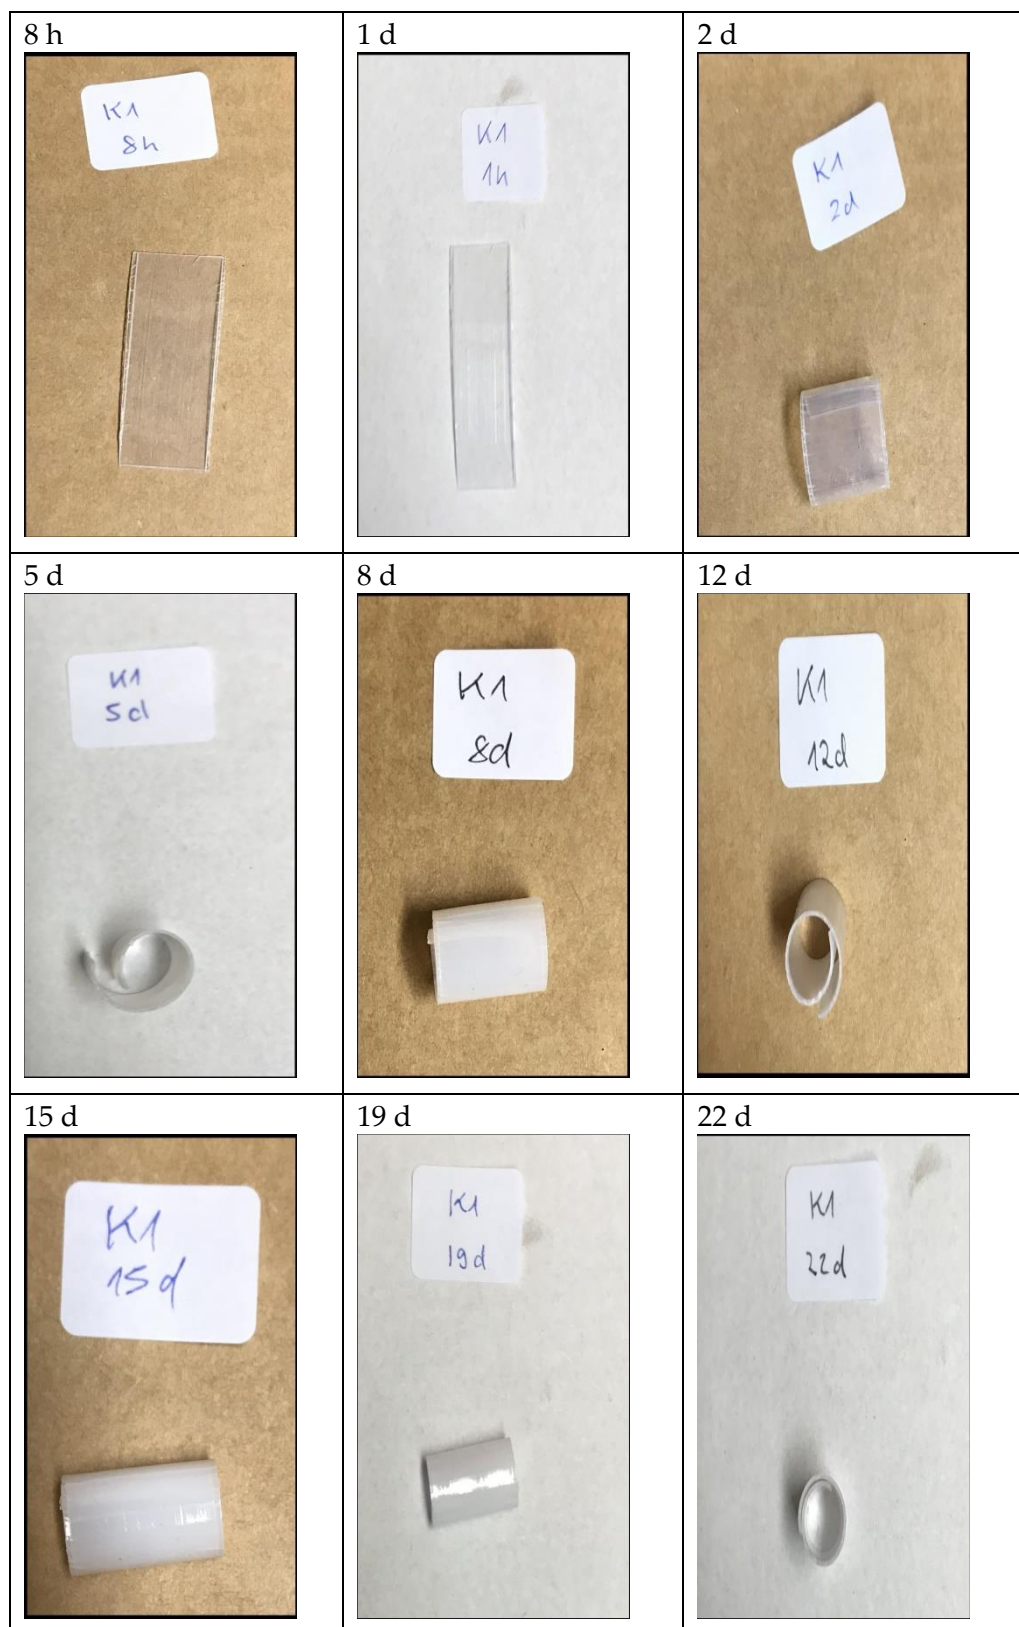

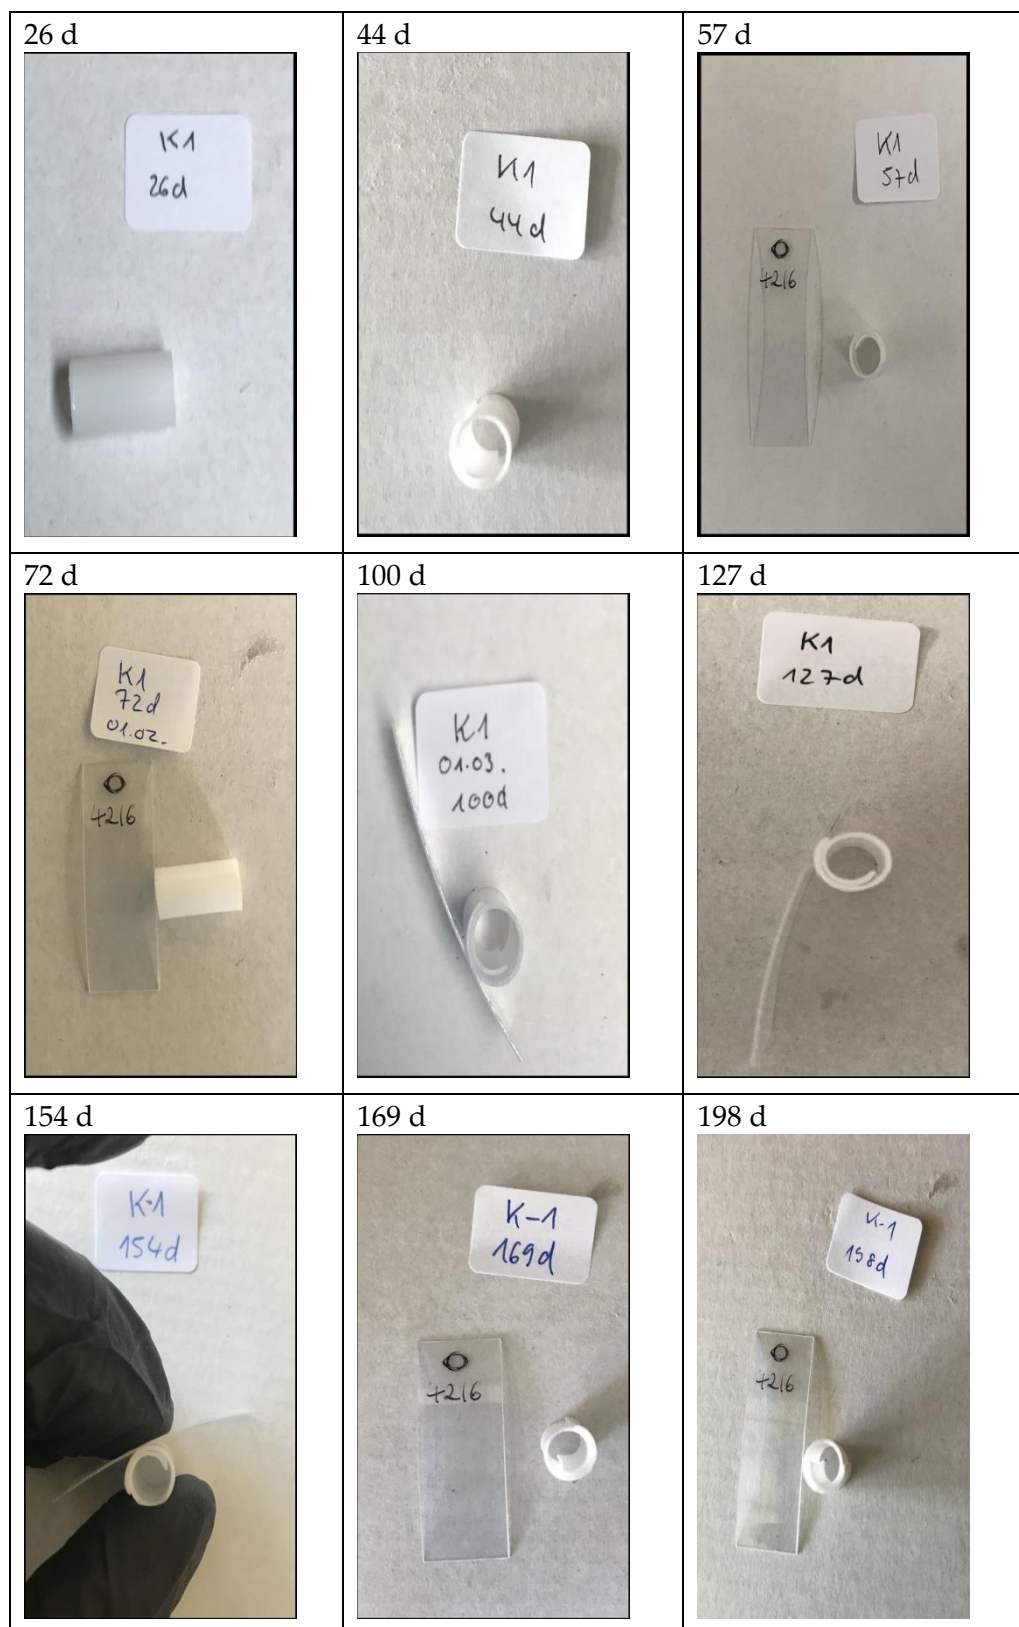



## 2.2 95% Ethanol at 40 °C

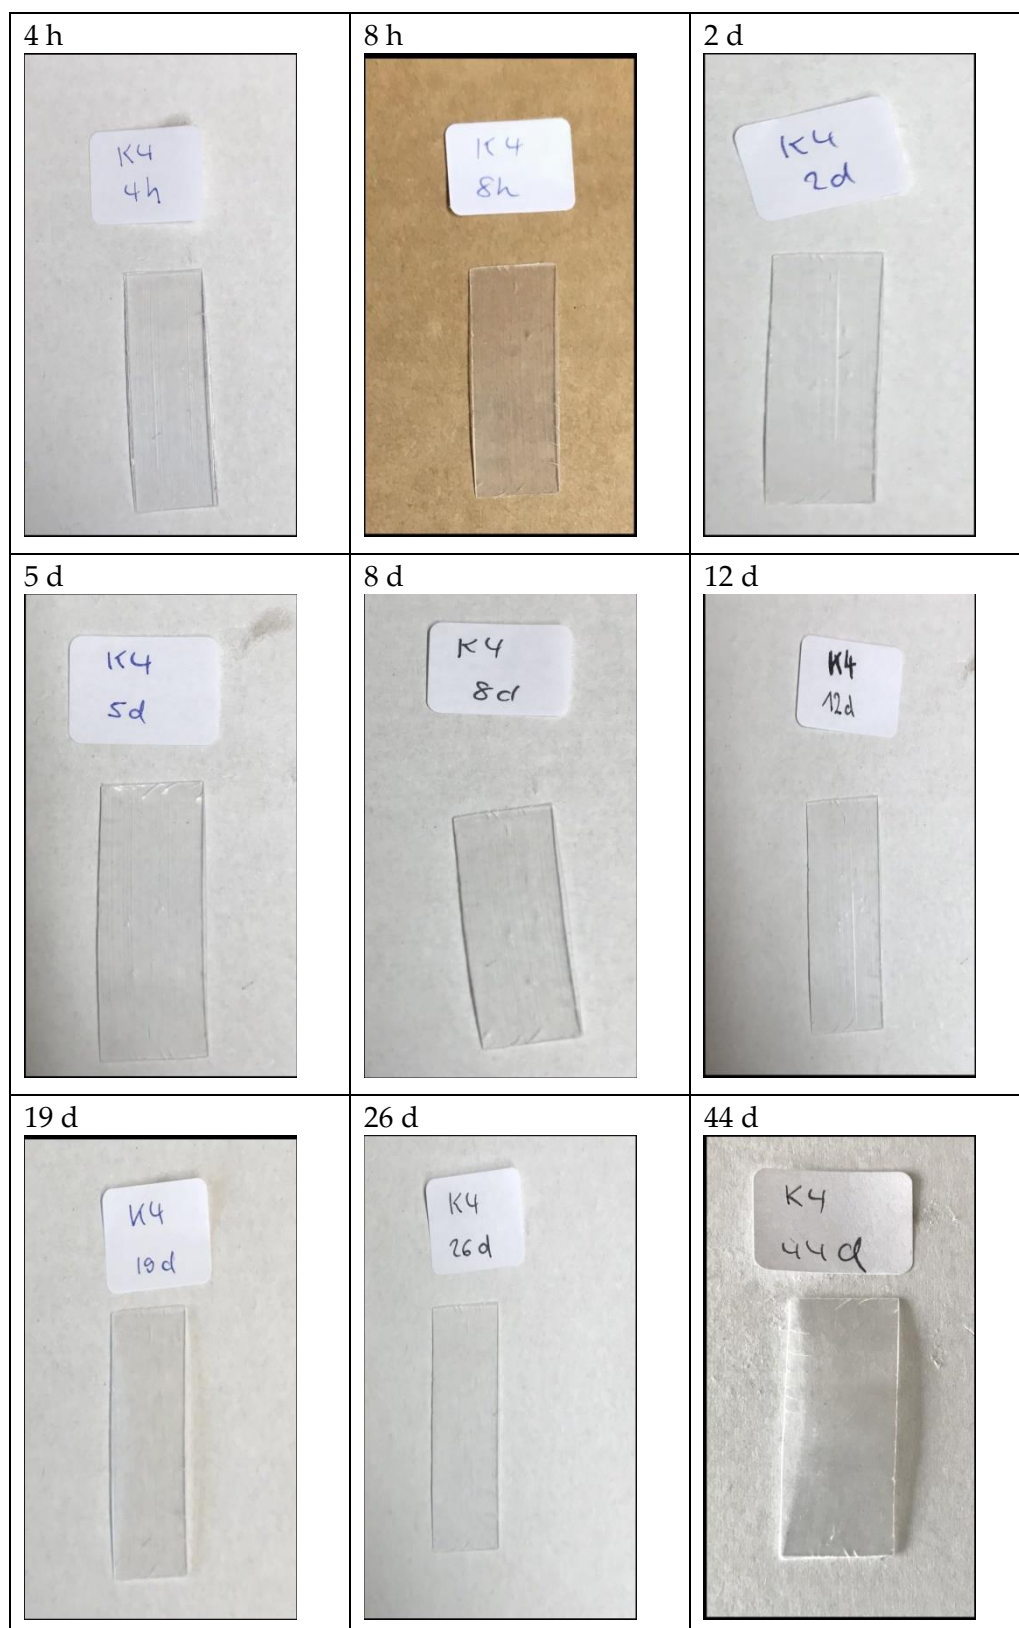

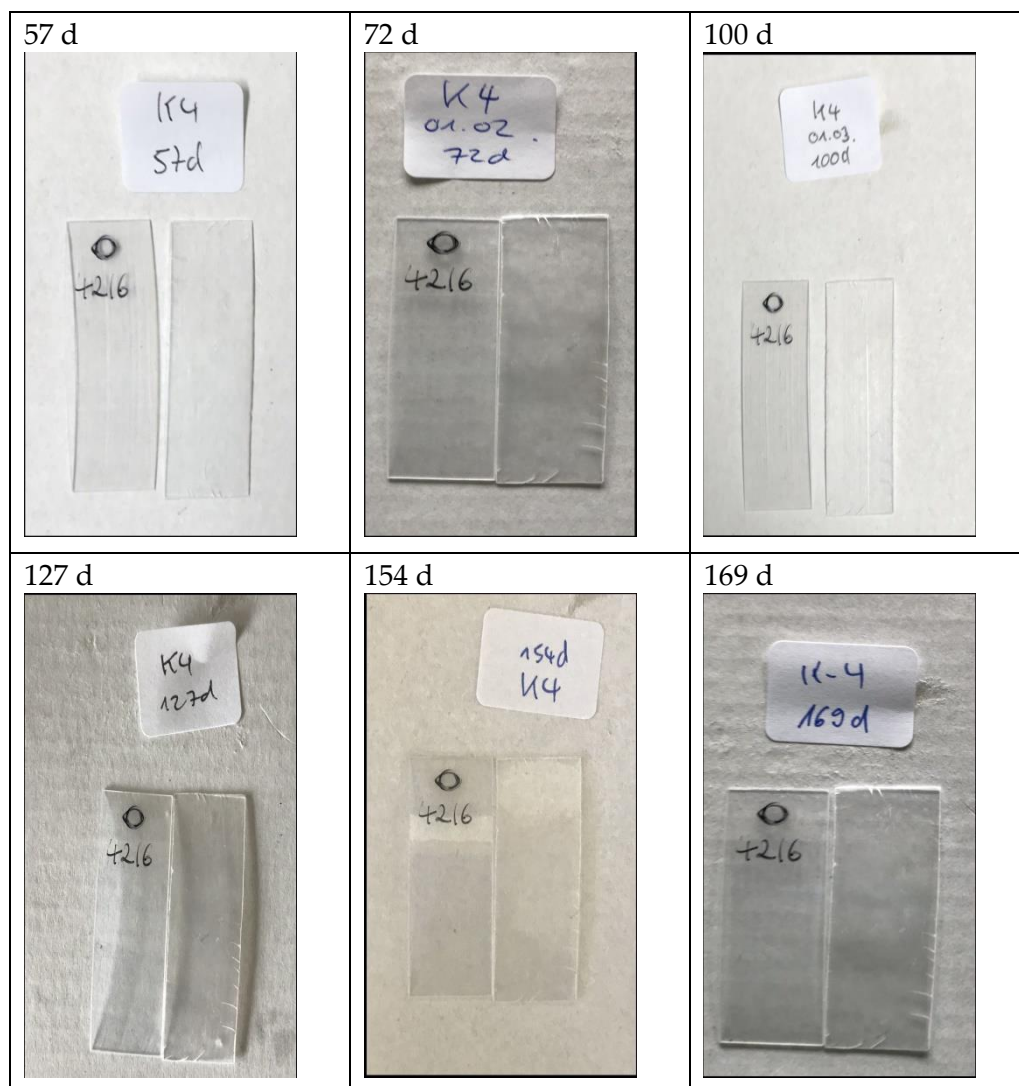

## 2.3 95% Ethanol at 20 °C

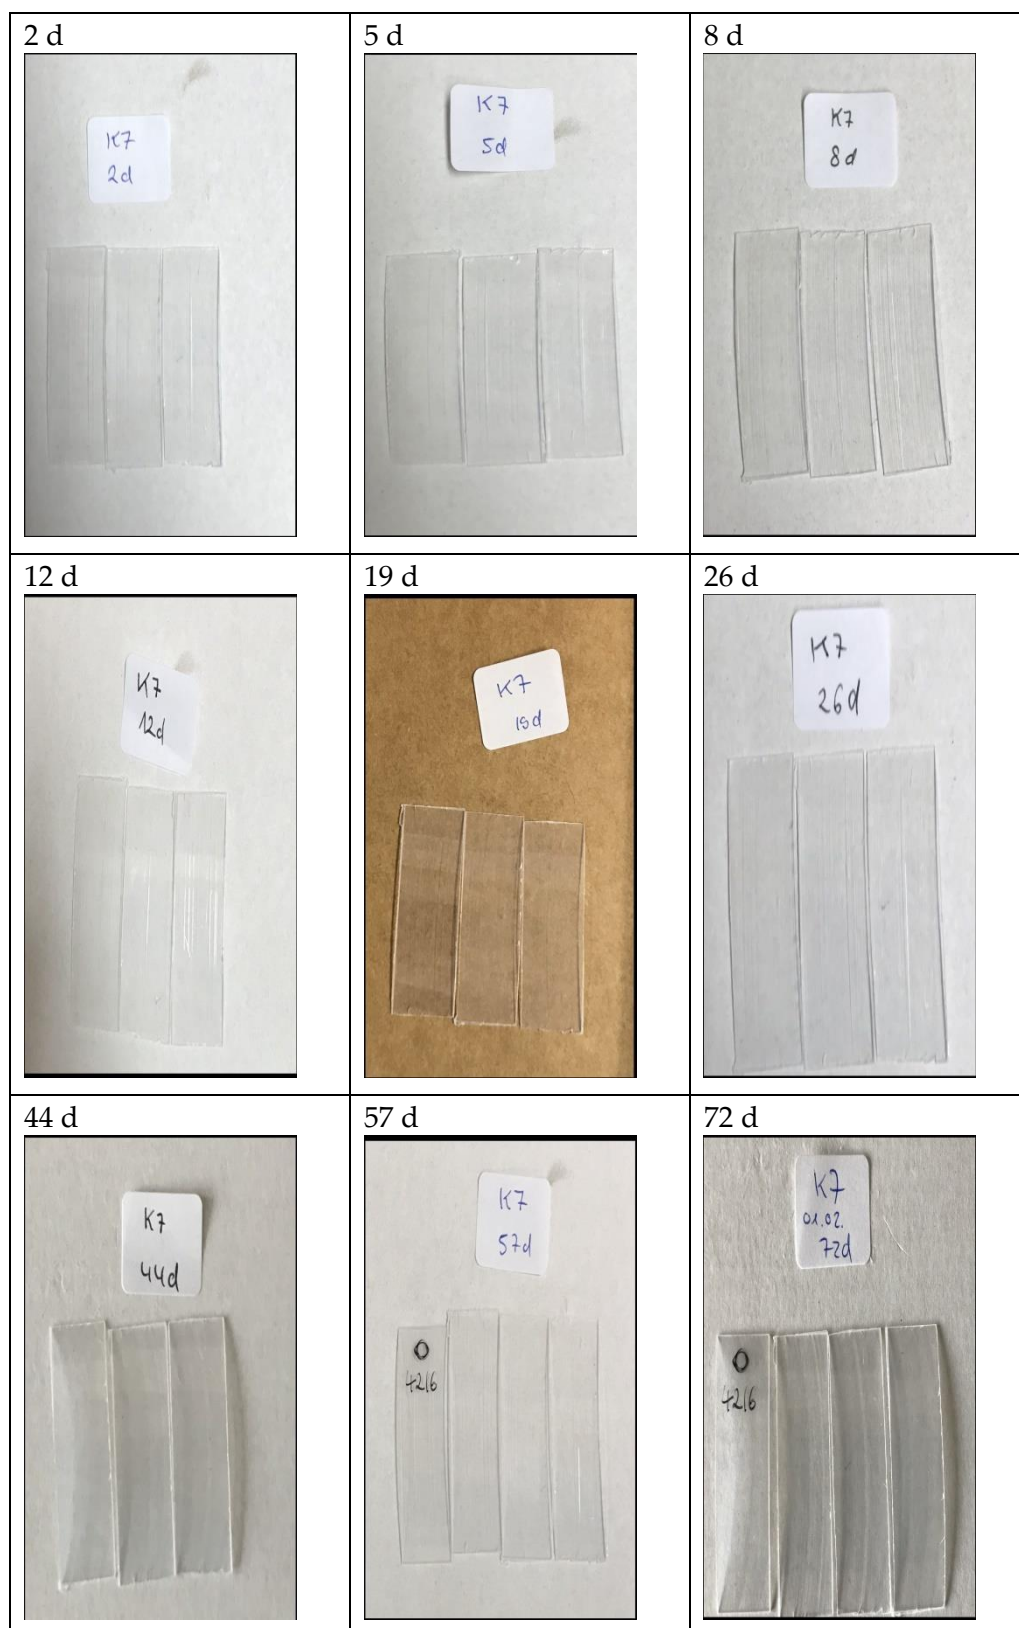

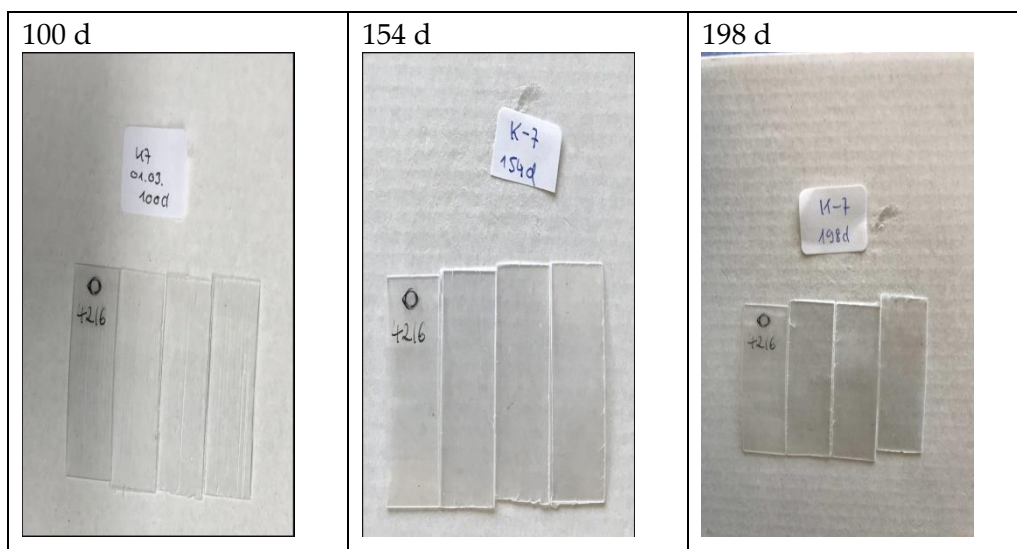

### 3 Contact with 50% Ethanol

#### 3.1 50% Ethanol at 60 °C

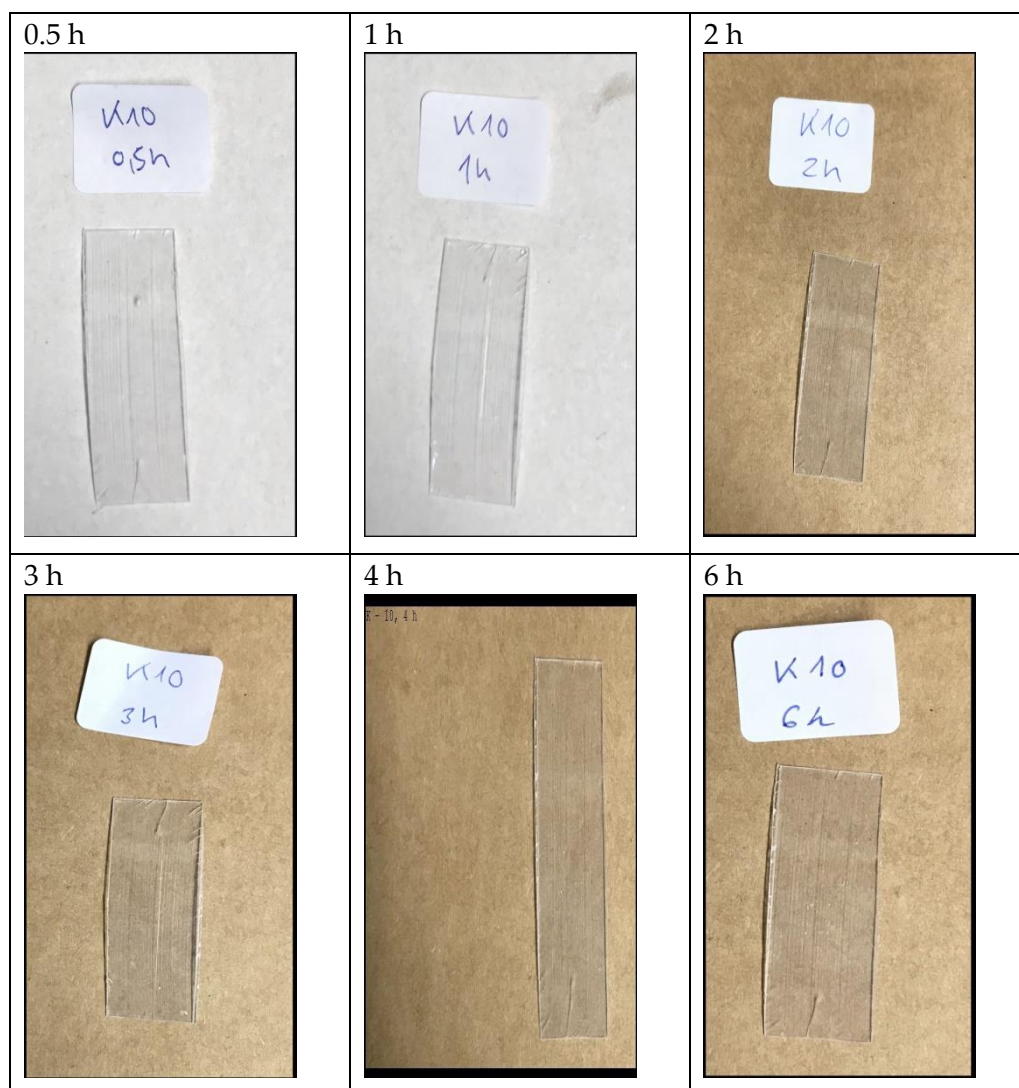



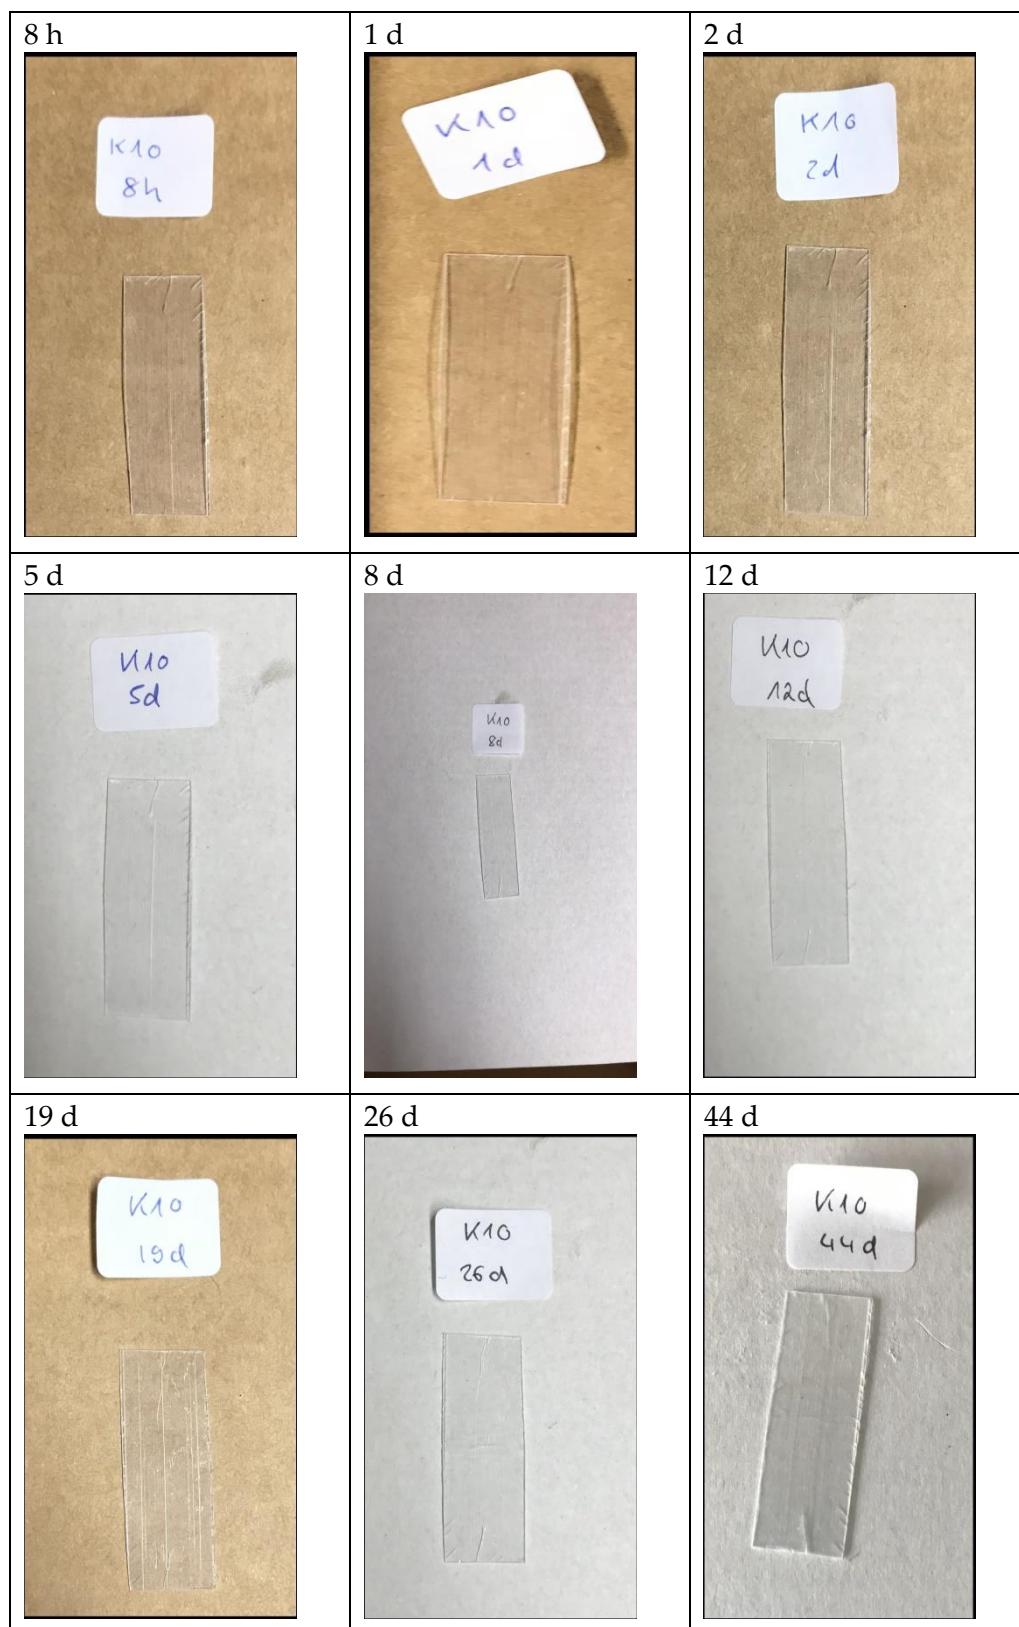

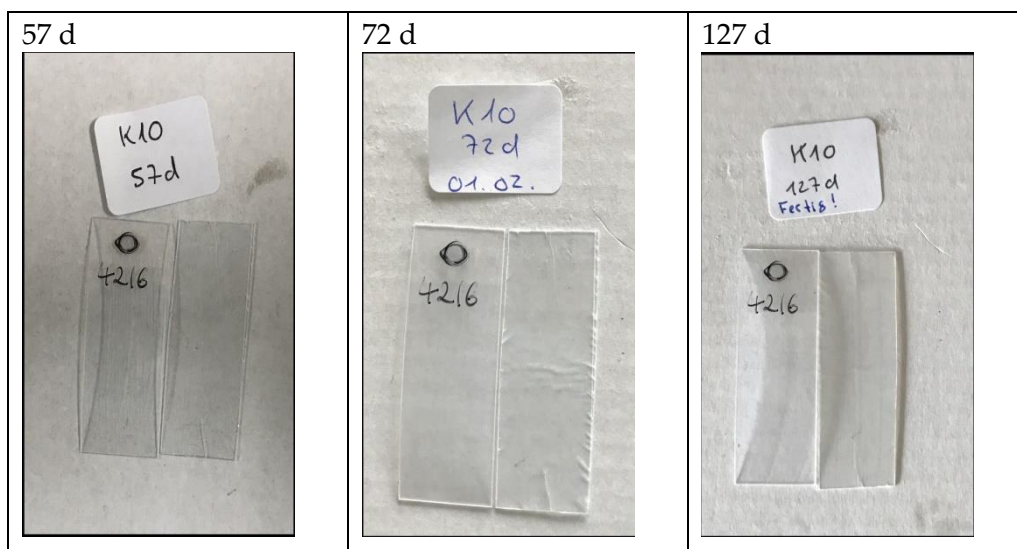

### 3.2 50% Ethanol at 40 °C

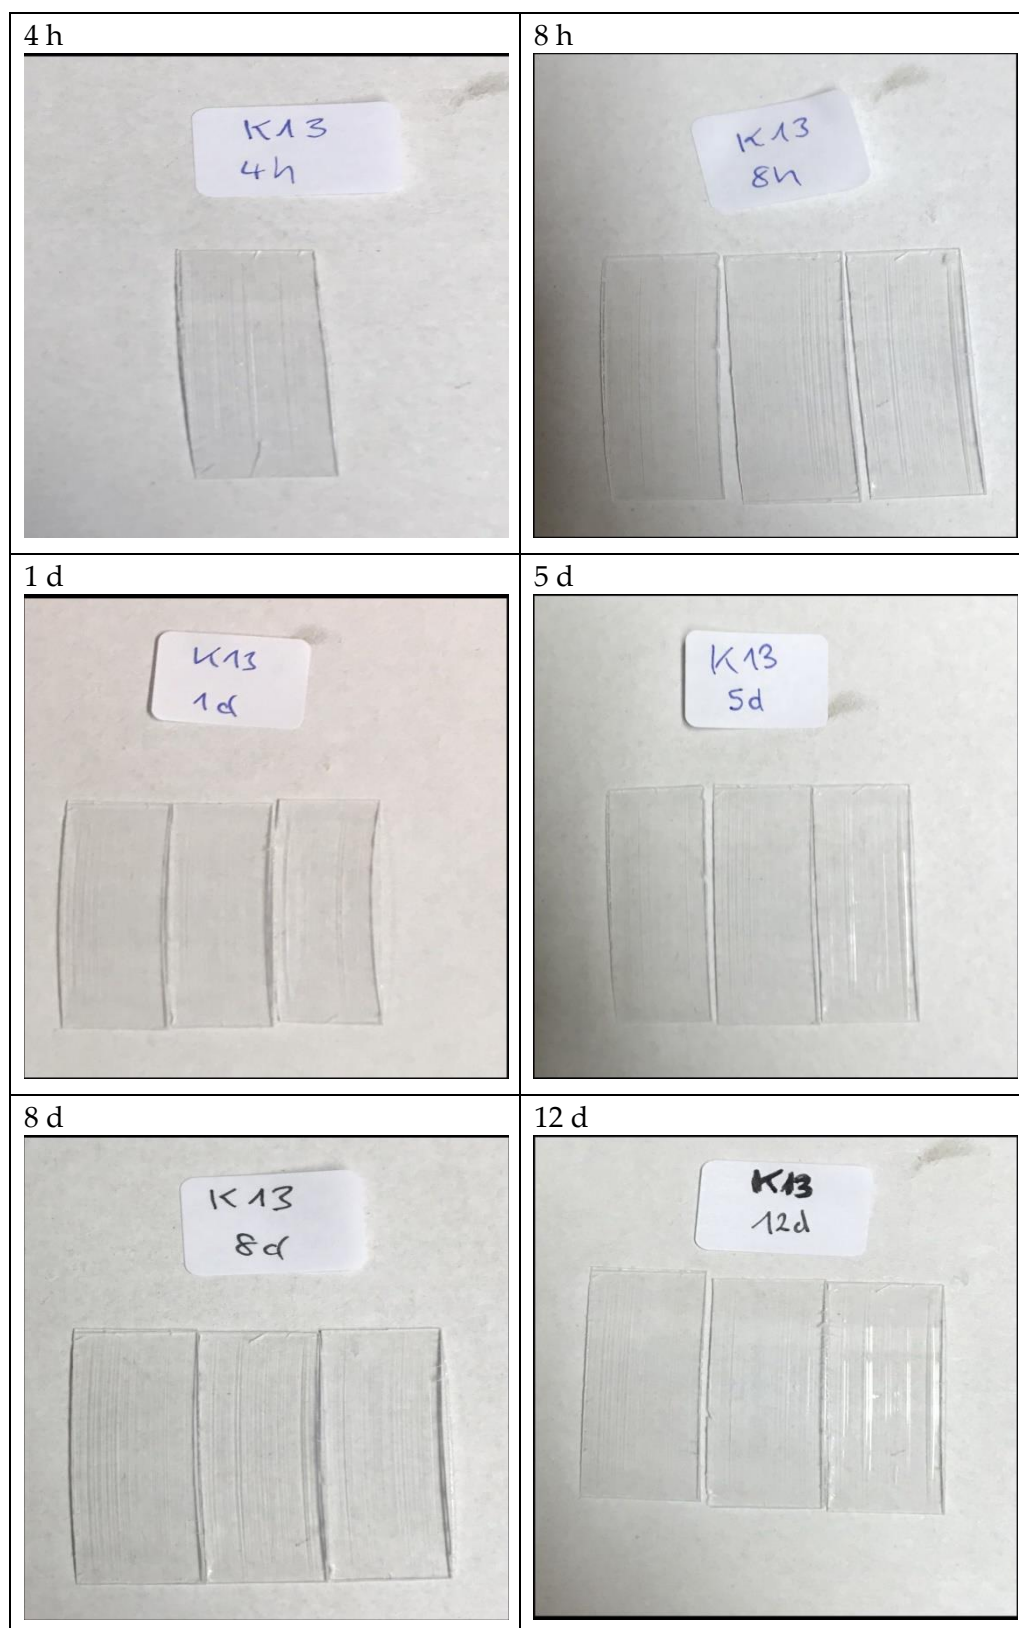



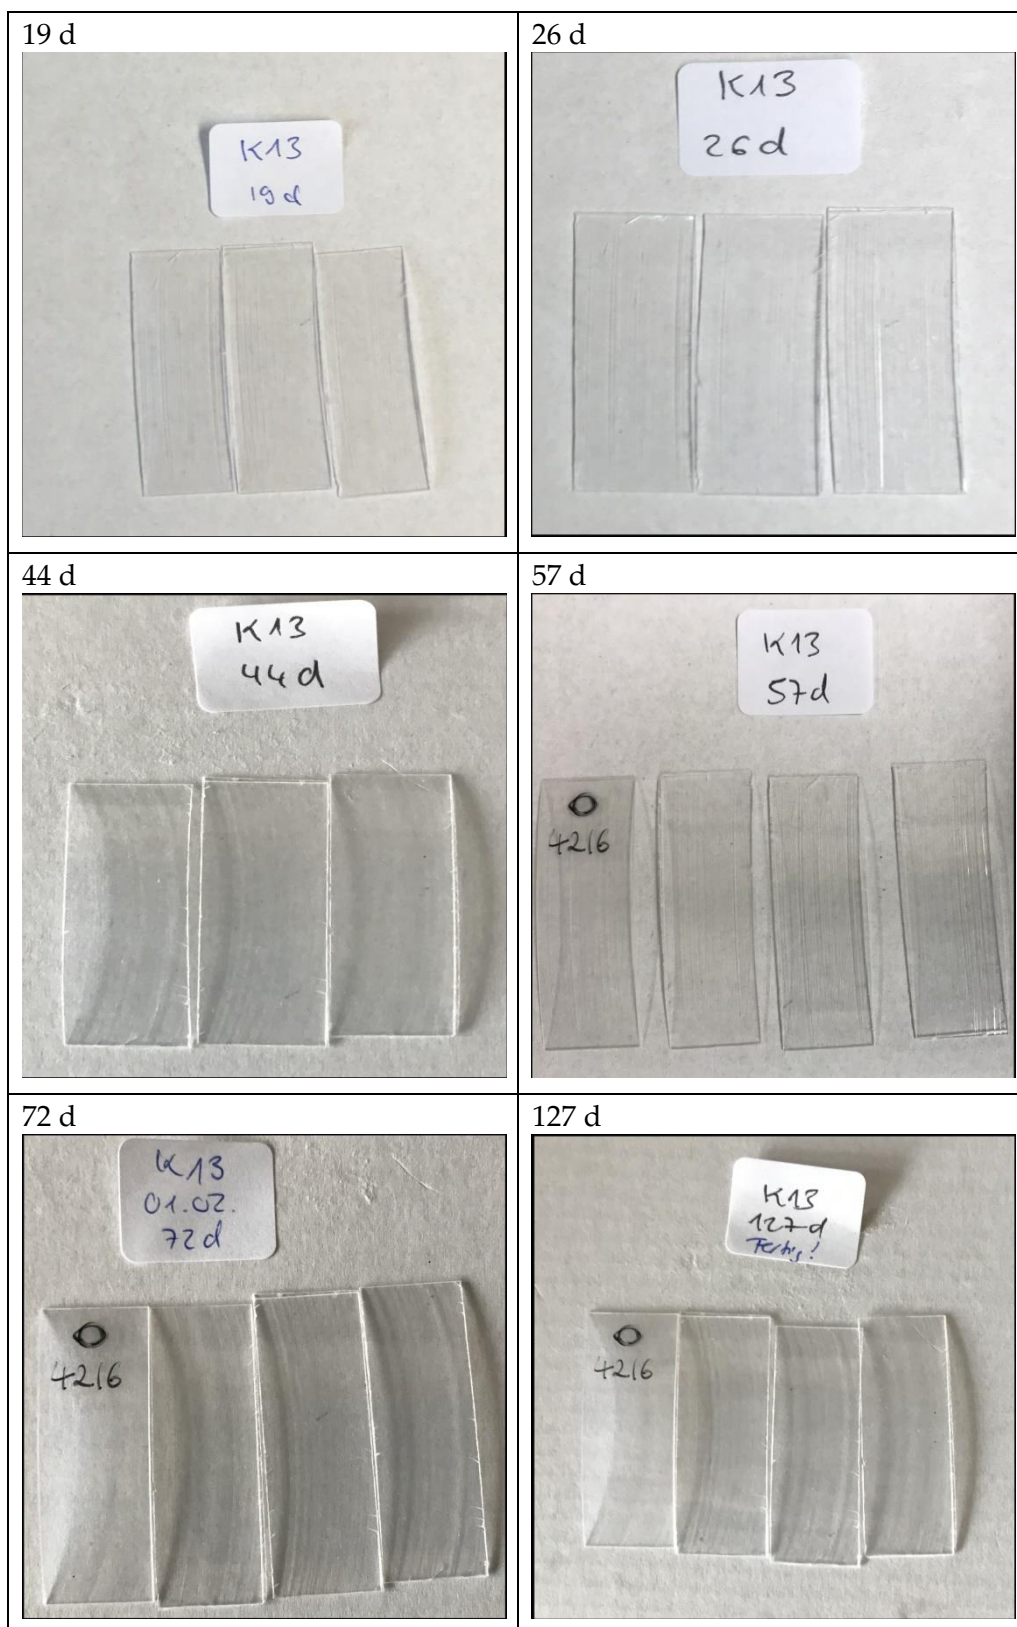

### 3.3 50% Ethanol at 20 °C

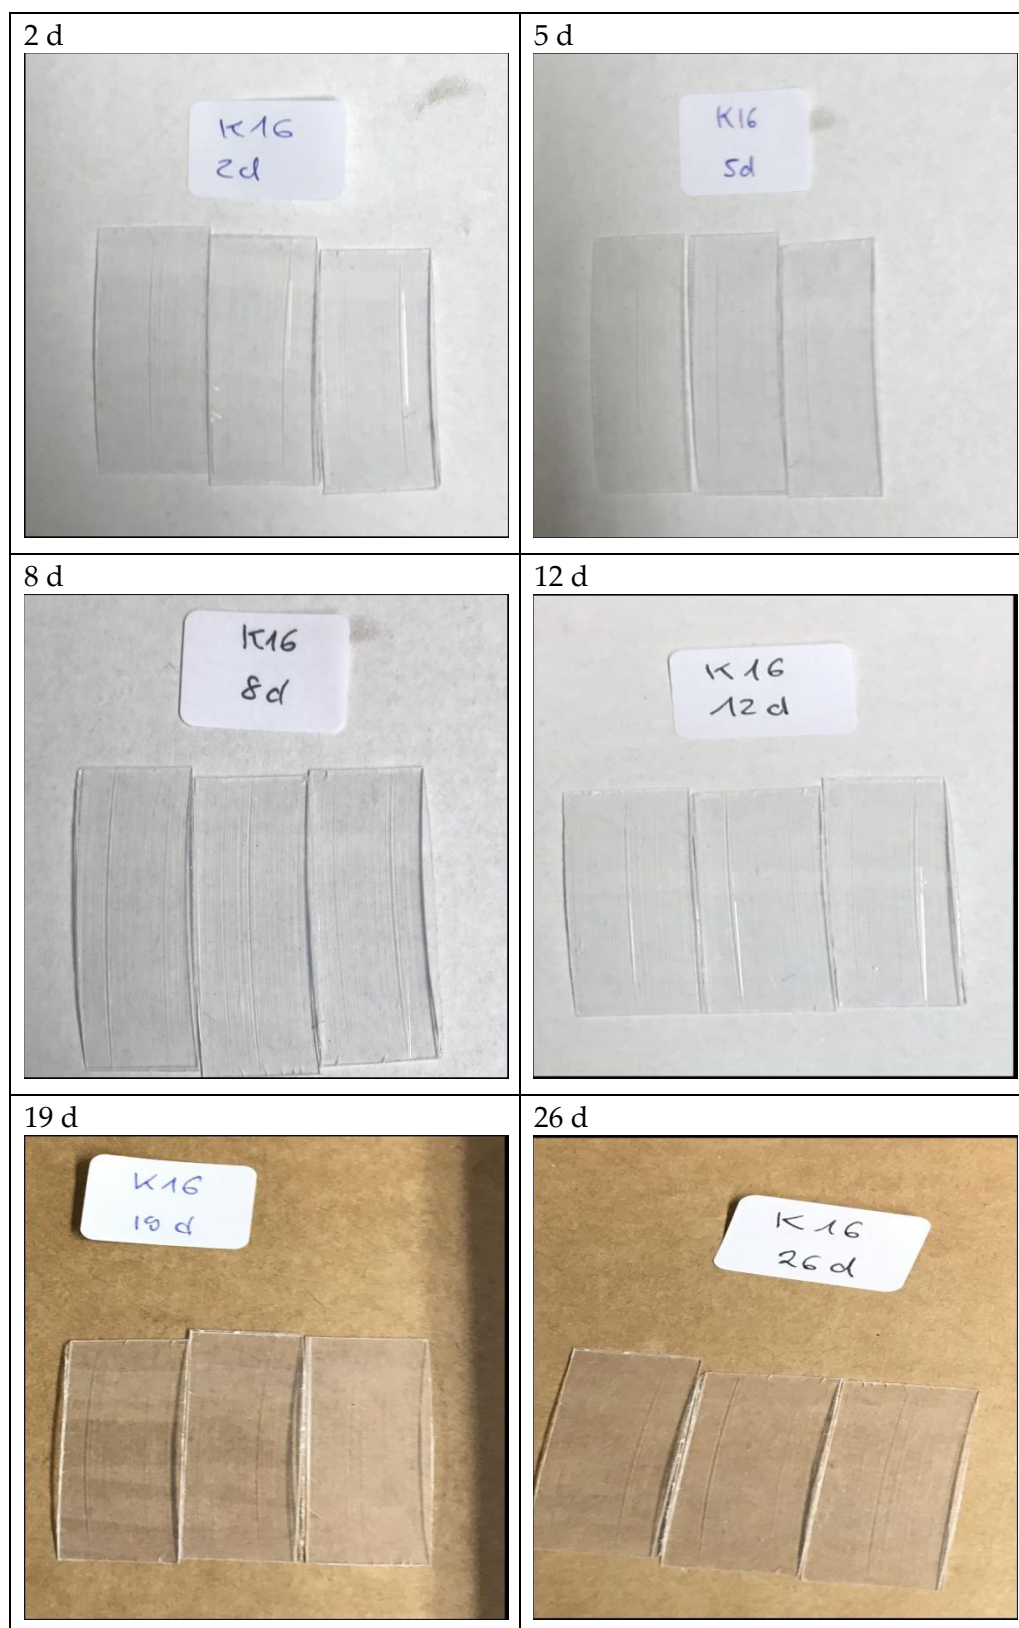

44 d

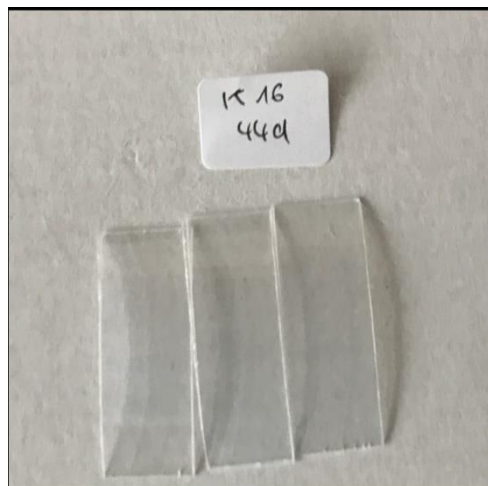

57 d

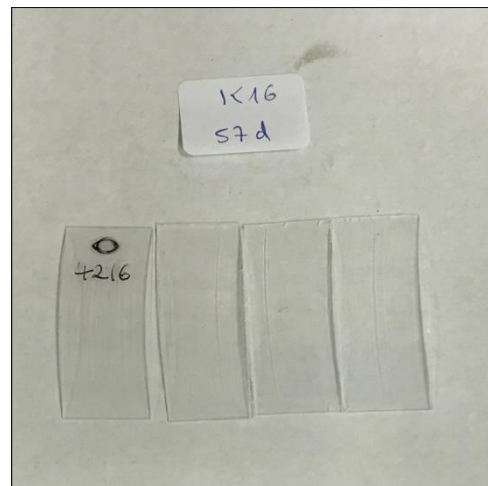

72 d

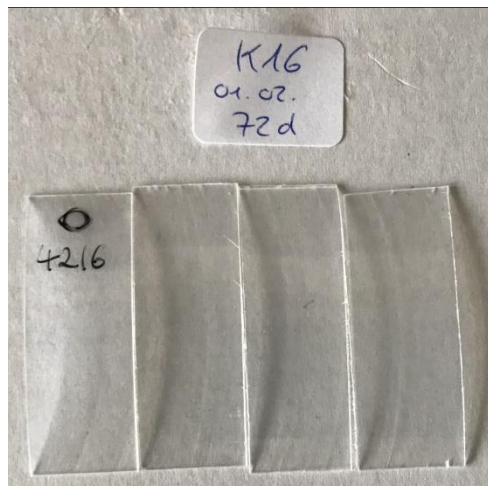

127 d

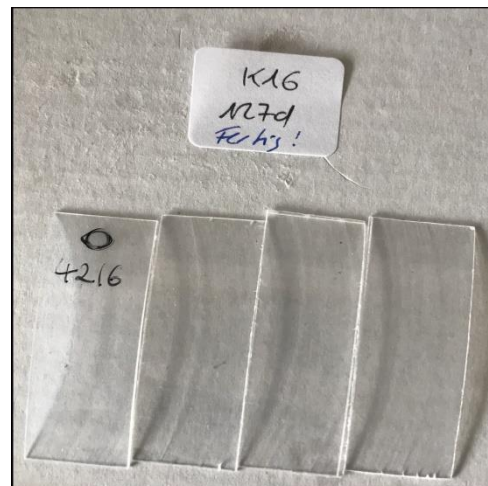

## 4 Contact with 20% Ethanol

### 4.1 20% Ethanol at 60 °C

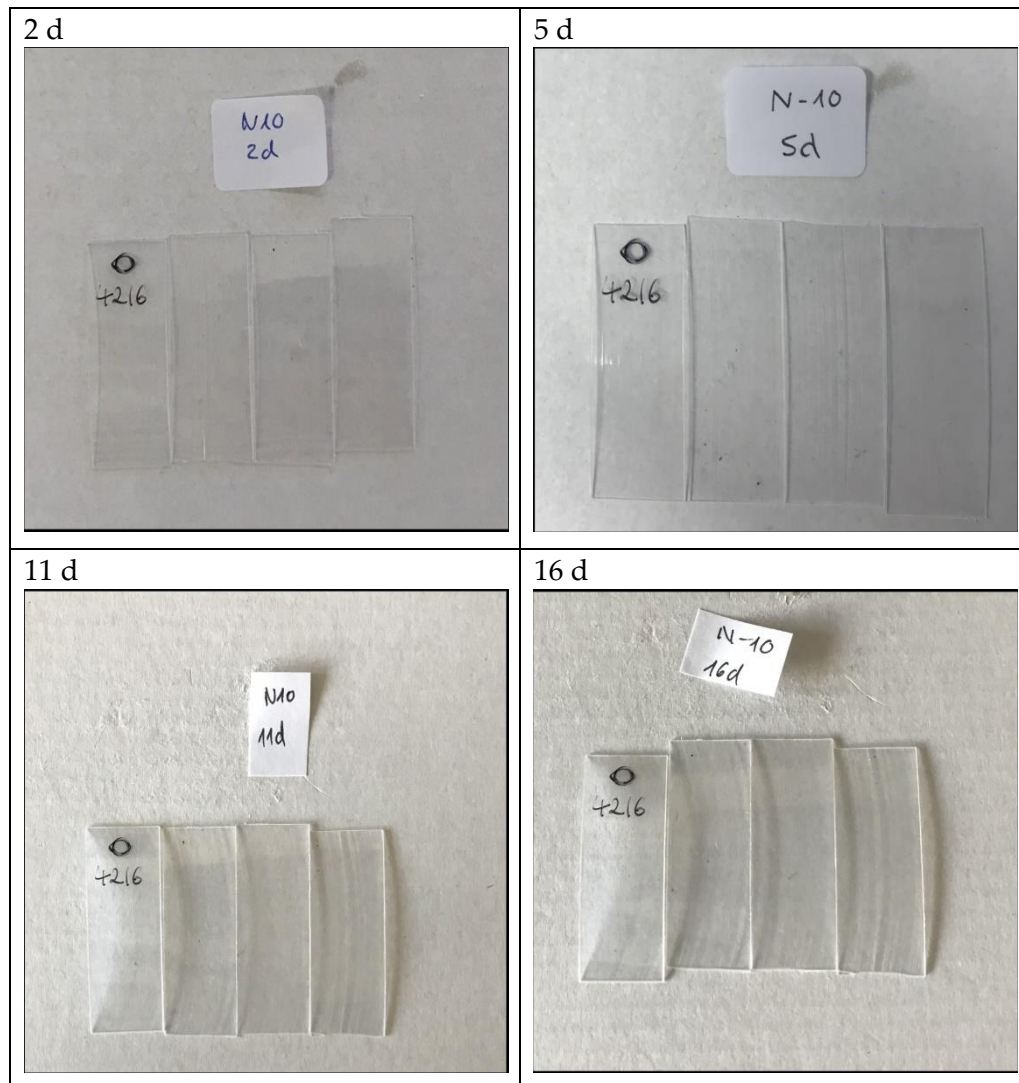



19 d

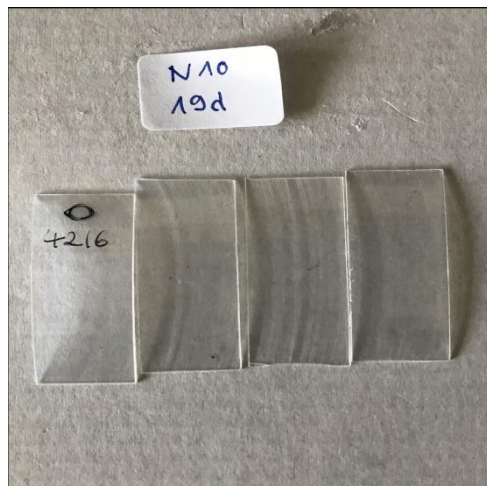

45 d

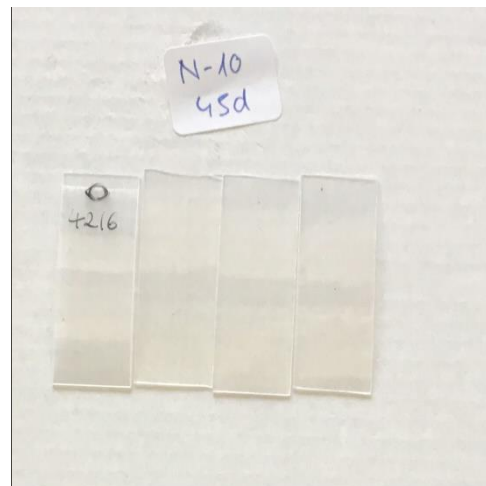

60 d

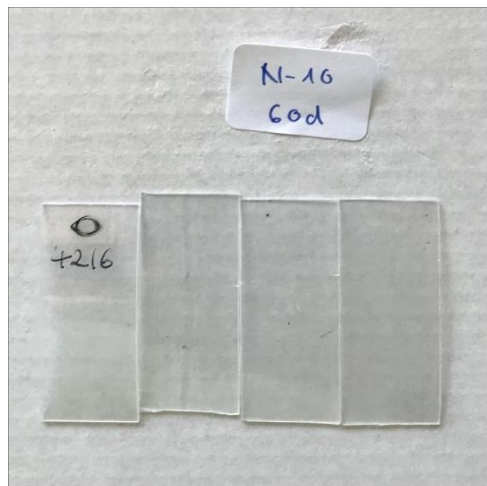

## 4.2 20% Ethanol at 40 °C

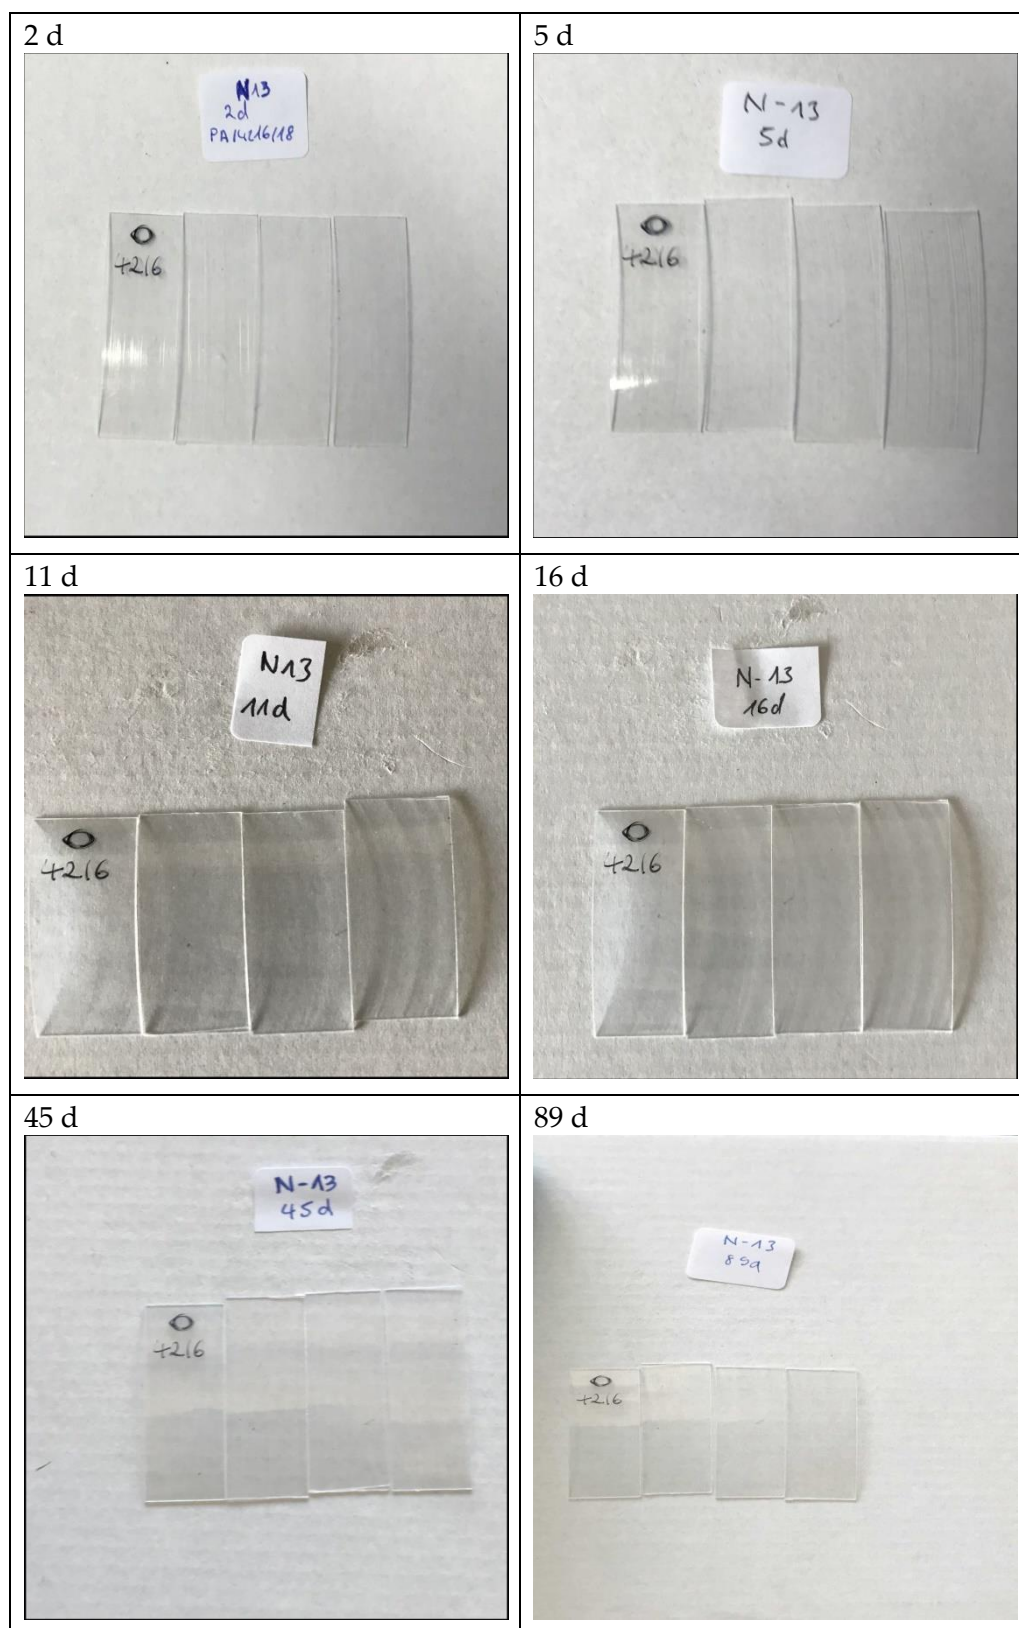

### 4.3 20% Ethanol at 20 °C

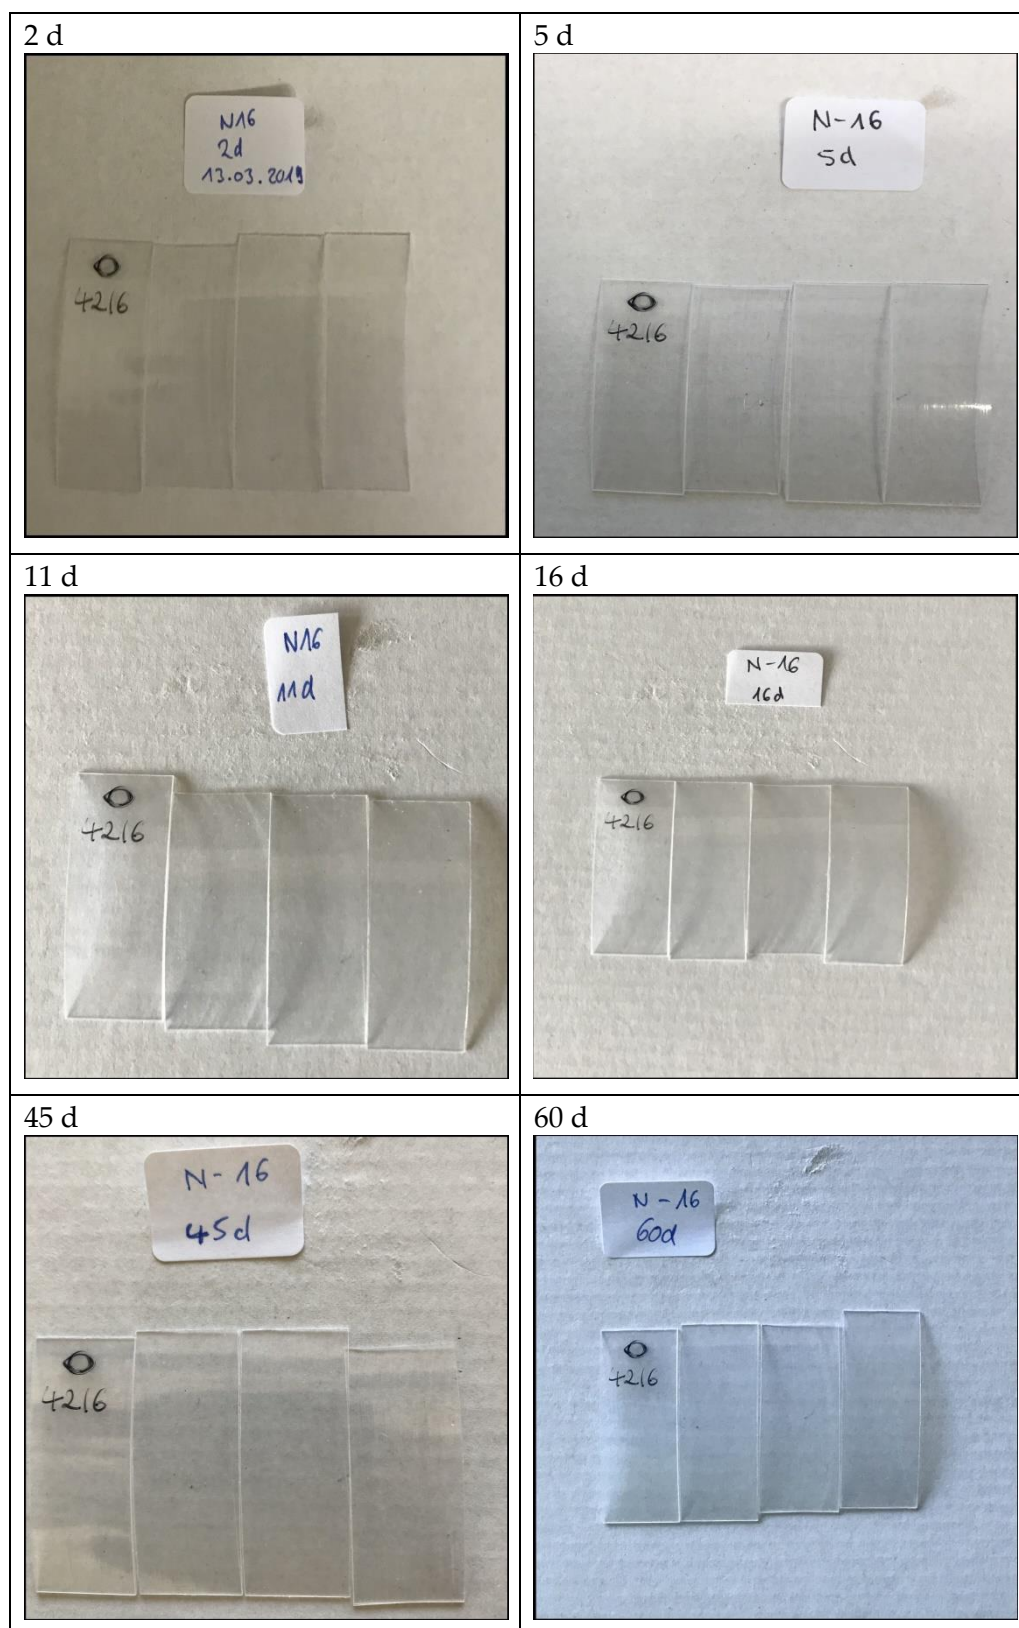

89 d

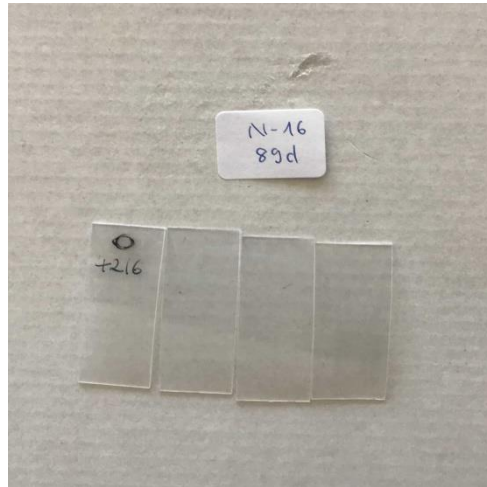



## 5 Contact with 10% Ethanol

### 5.1 10% Ethanol at 60 °C

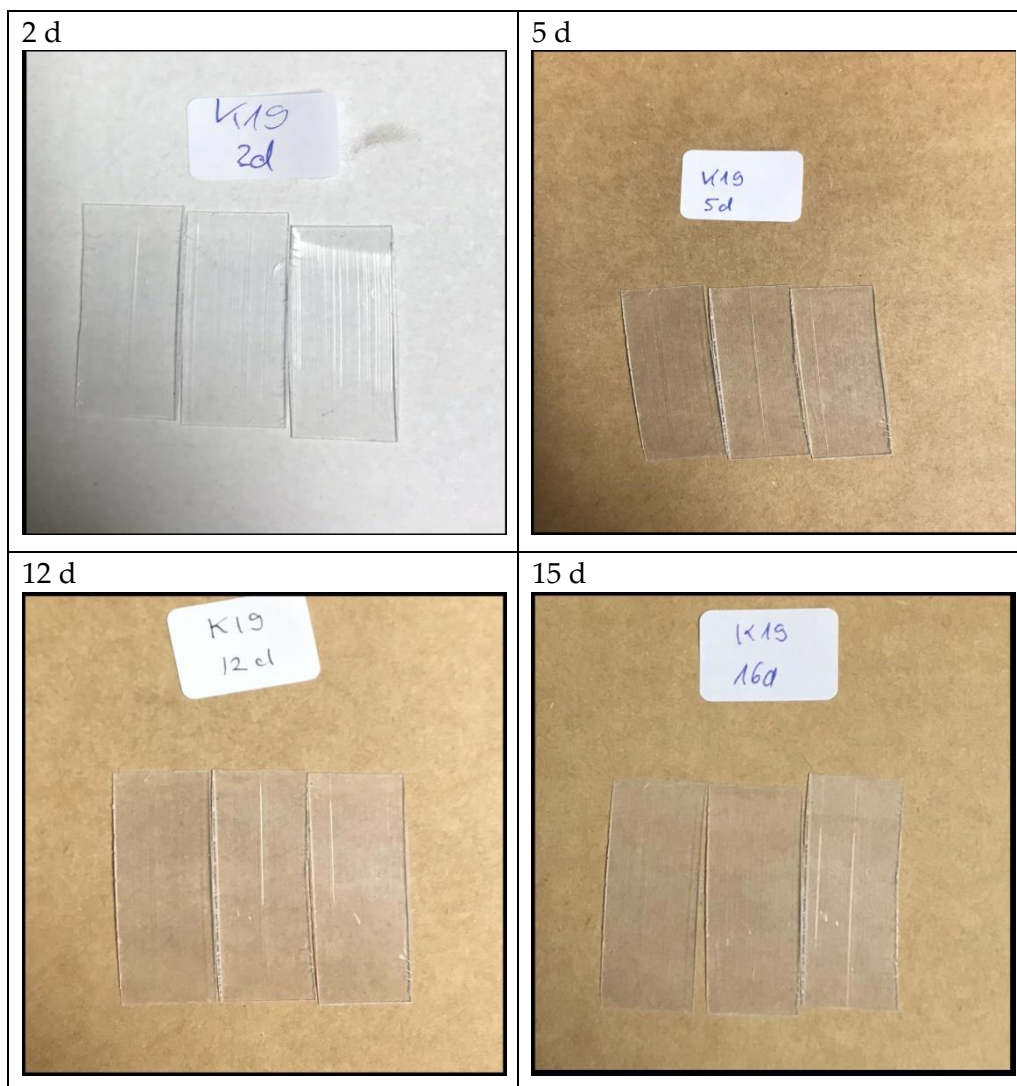

22 d

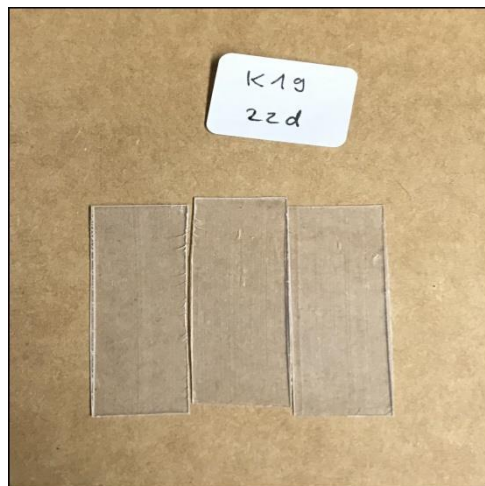

44 d

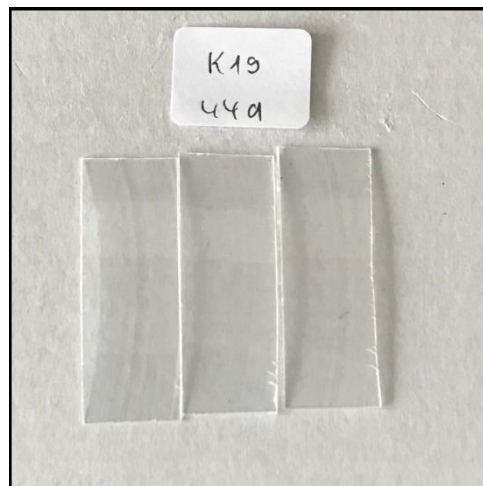

72 d

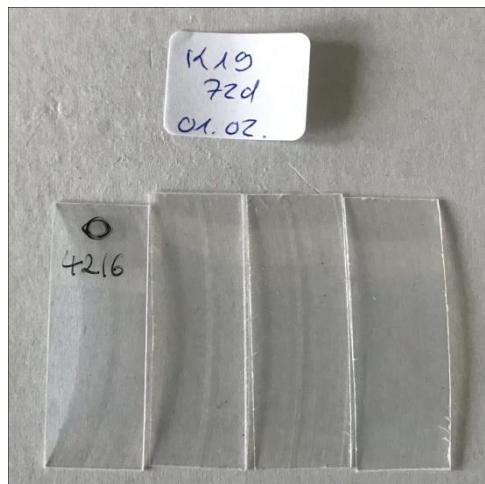

100 d

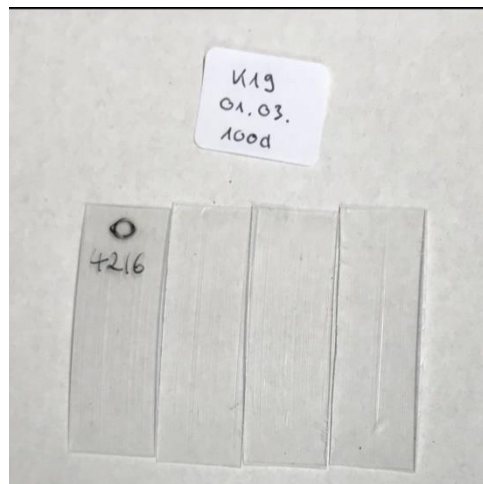

127

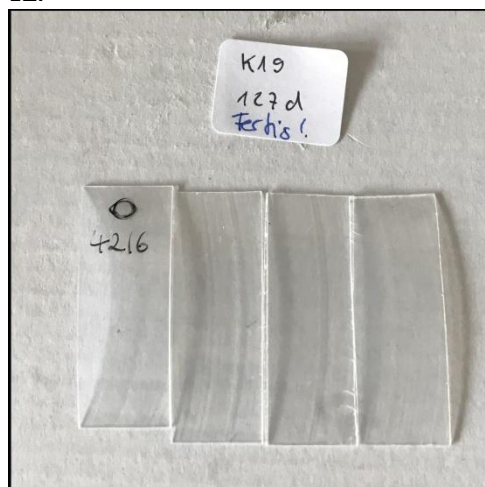

d

## 5.2 10% Ethanol at 40 °C

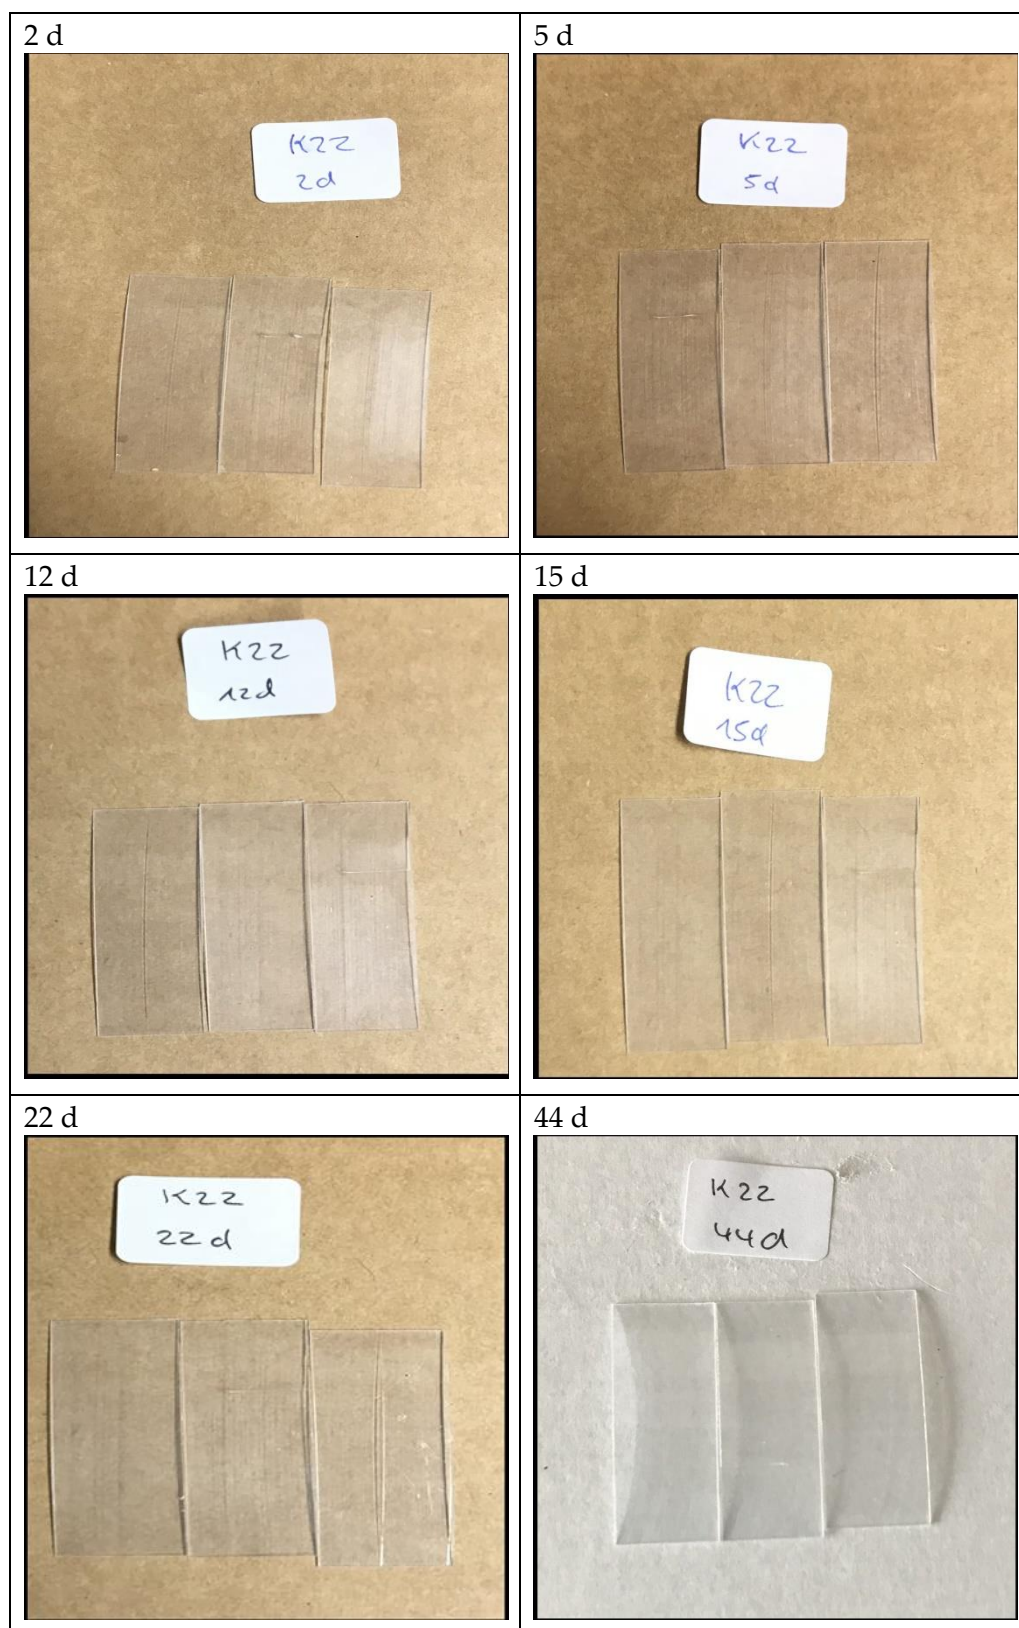



57 d

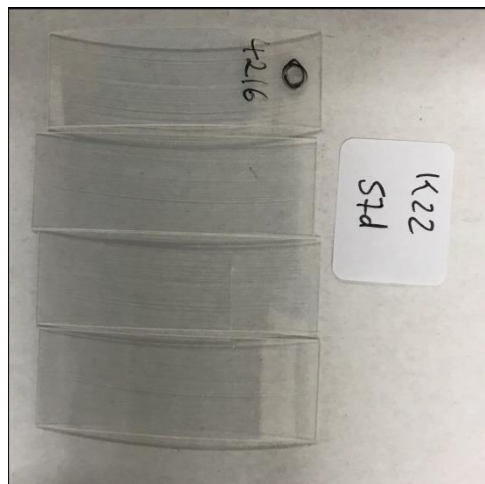

72 d

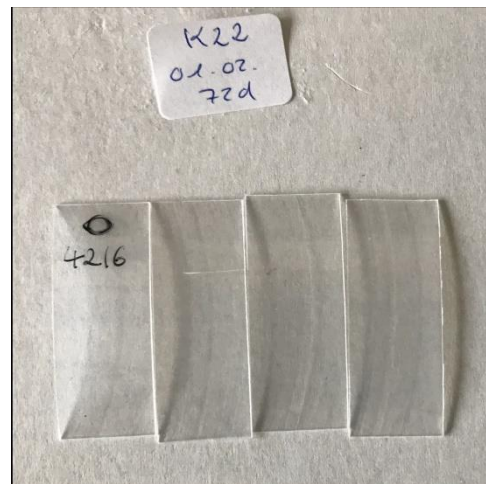

100 d

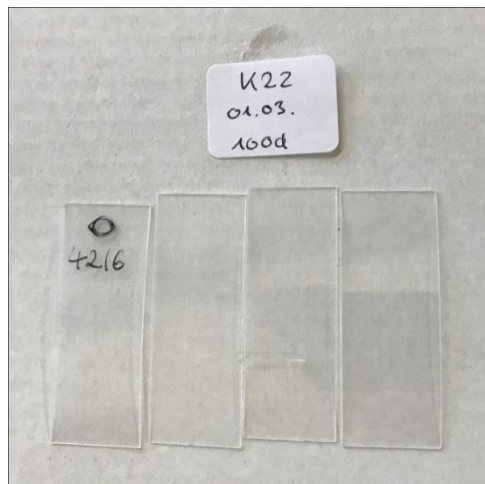

127 d

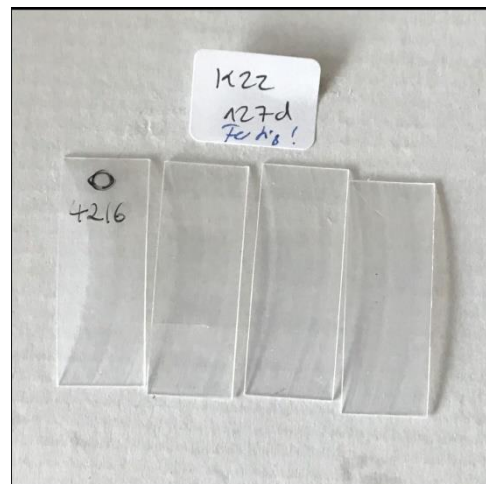

### 5.3 10% Ethanol at 20 °C

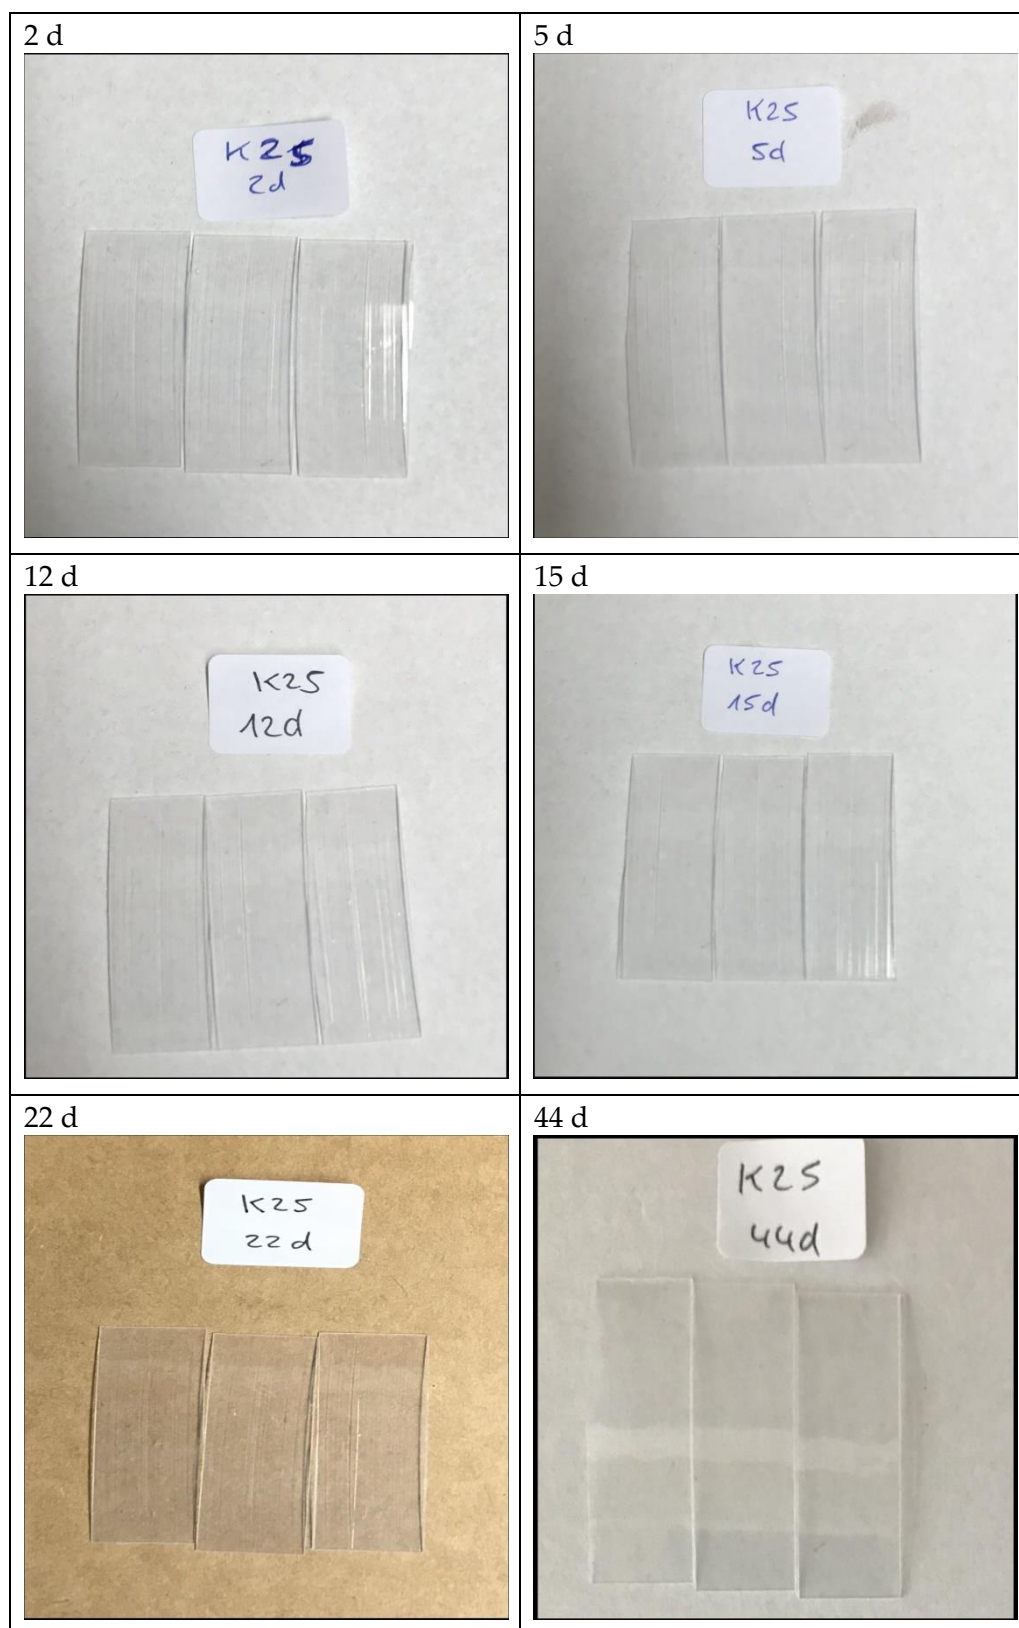

57 d

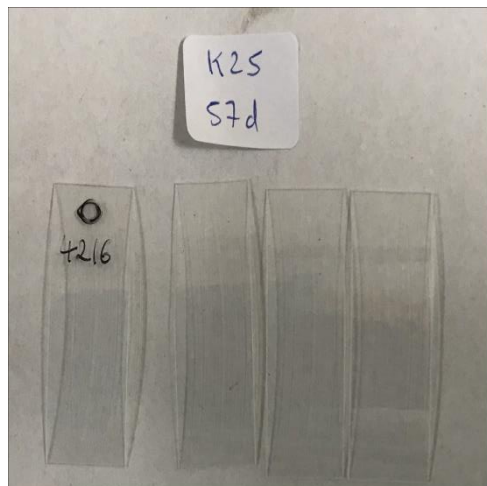

72 d

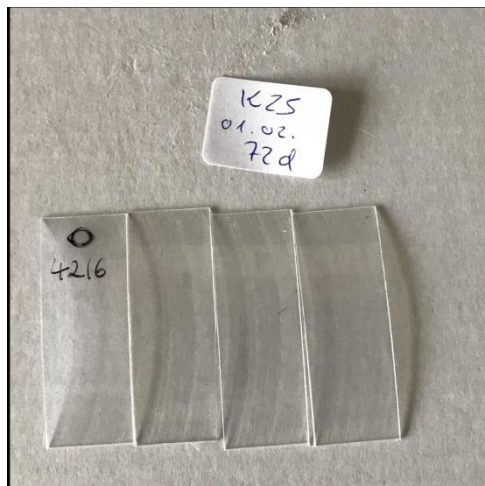

100 d

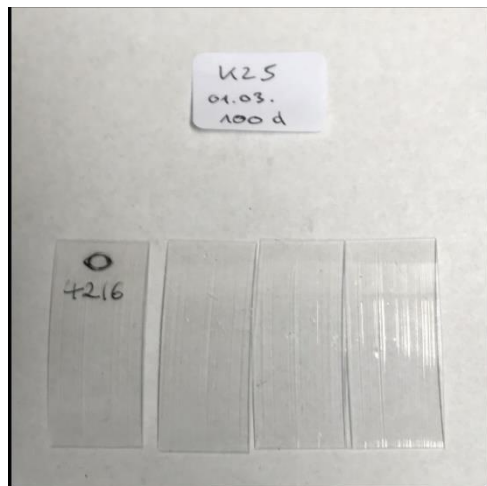

127 d

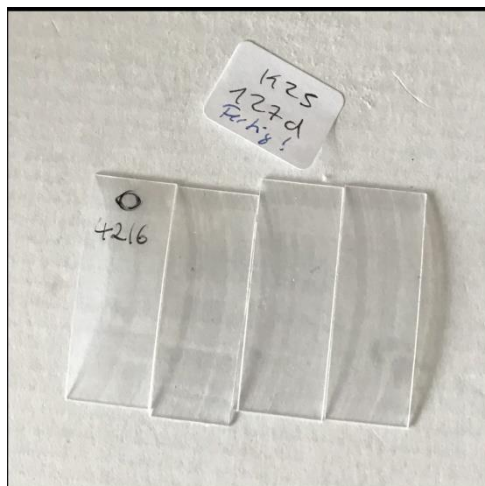

## 6 Contact with 3% Acetic acid

### 6.1 3% Acetic acid at 60 °C

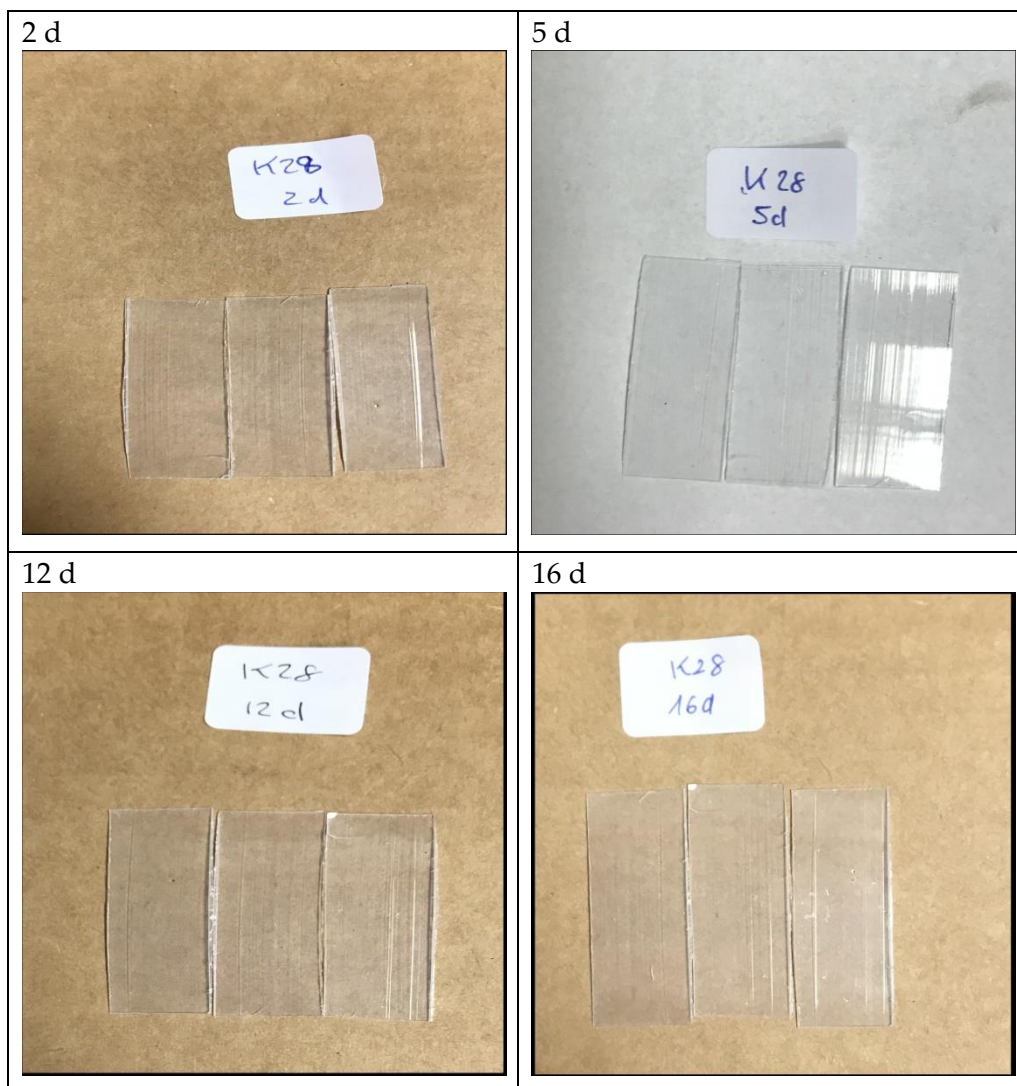



22 d

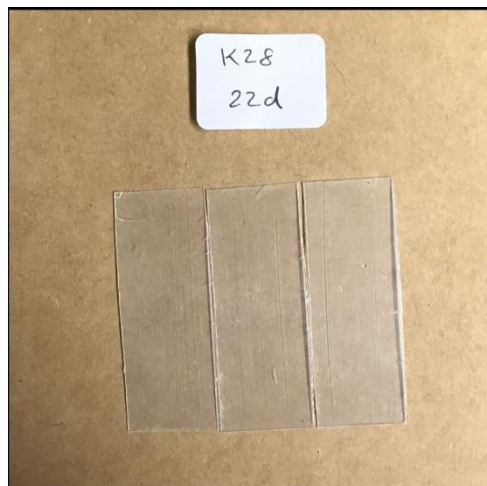

44 d

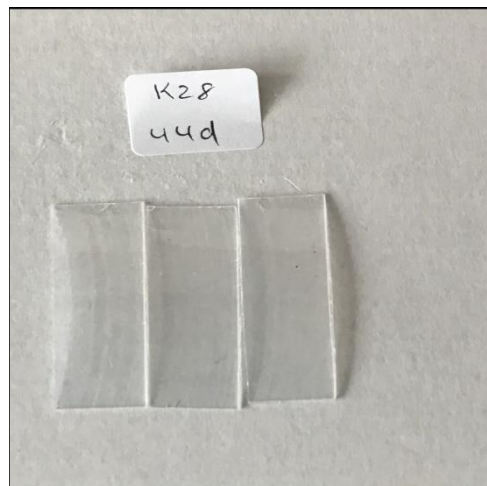

57 d

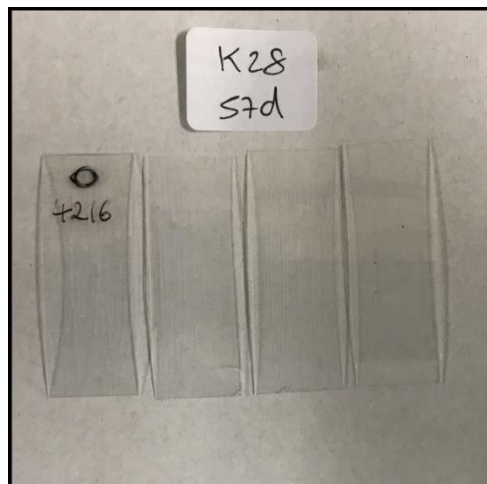

72 d

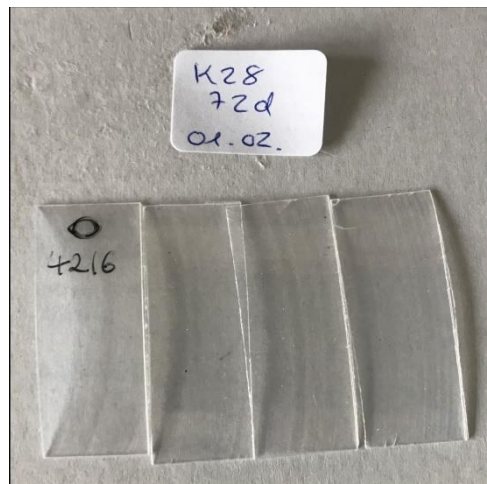

100 d

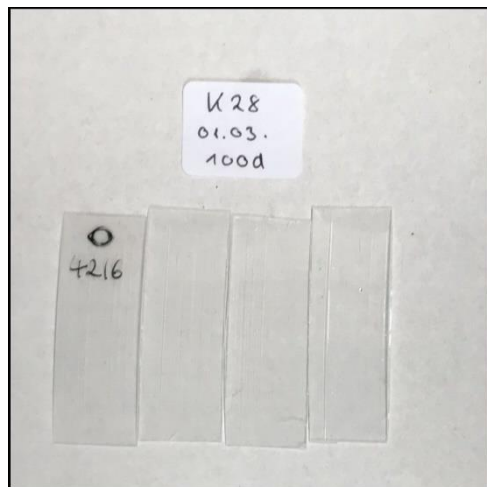

127 d

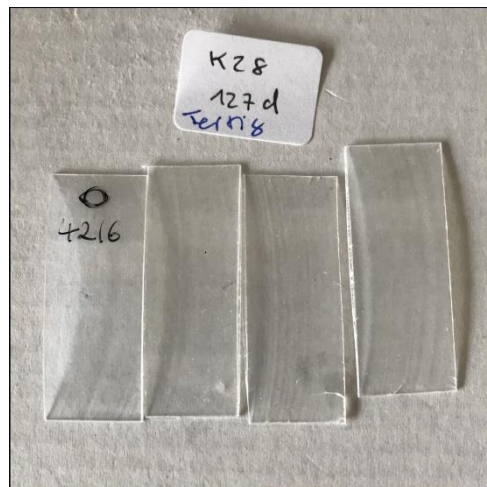



## 6.2 3% Acetic acid at 40 °C

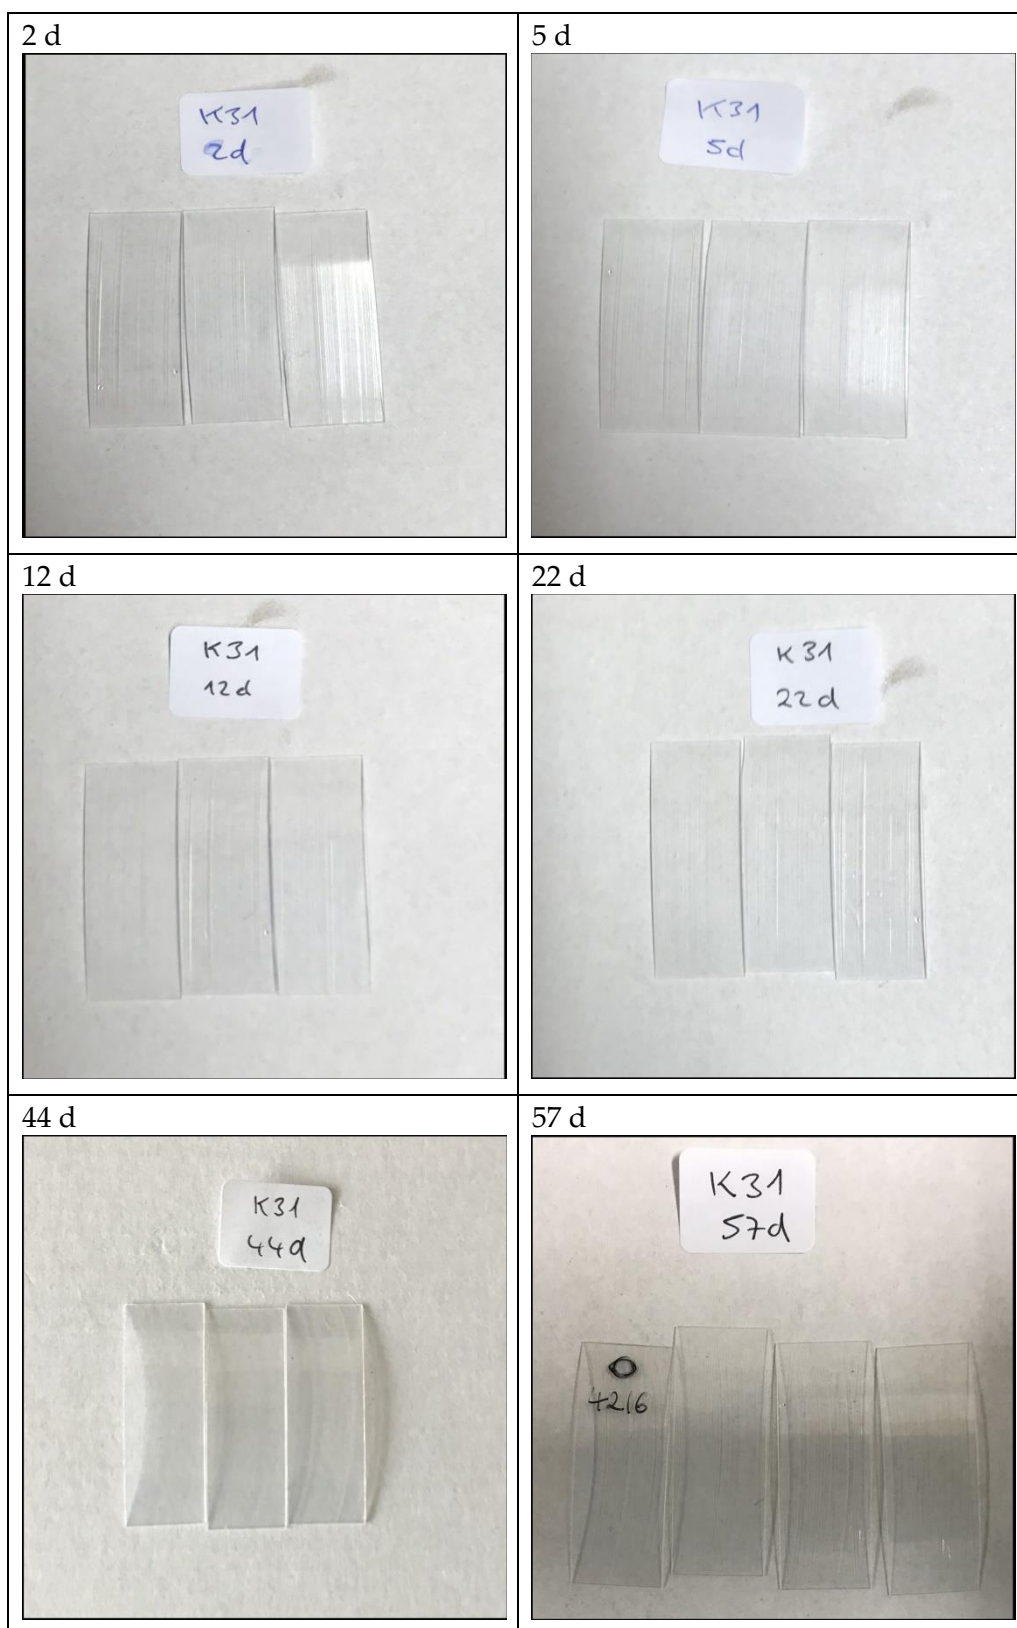

127 d

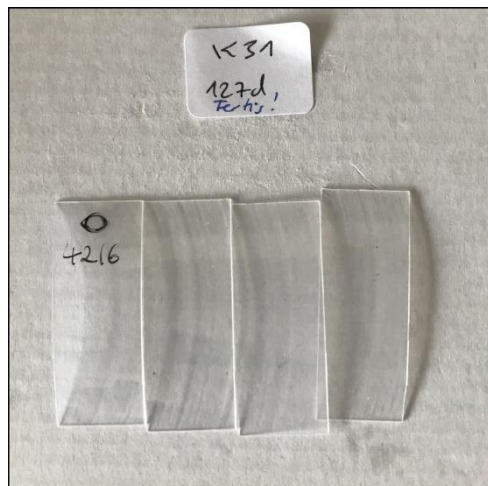

### 6.3 3% Acetic acid at 20 °C

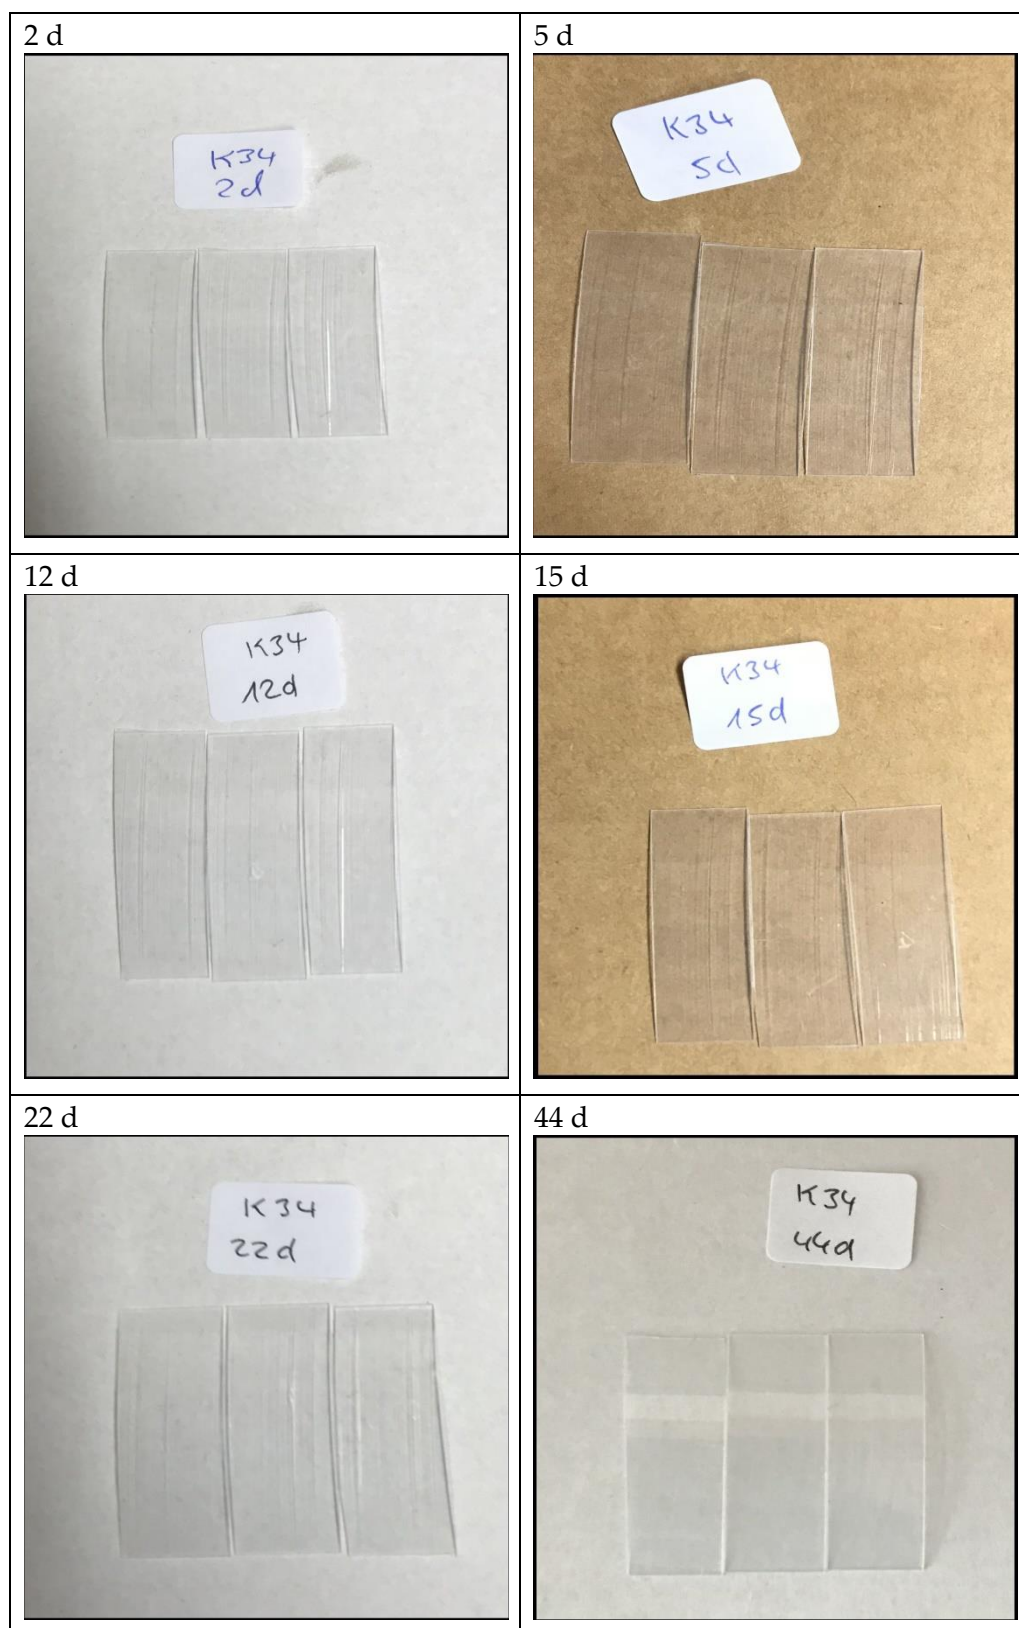

57 d

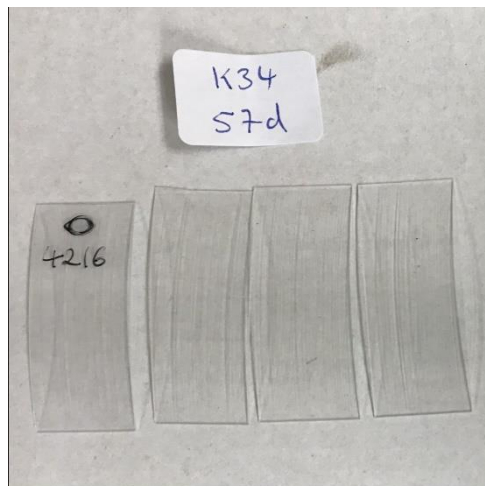

72 d

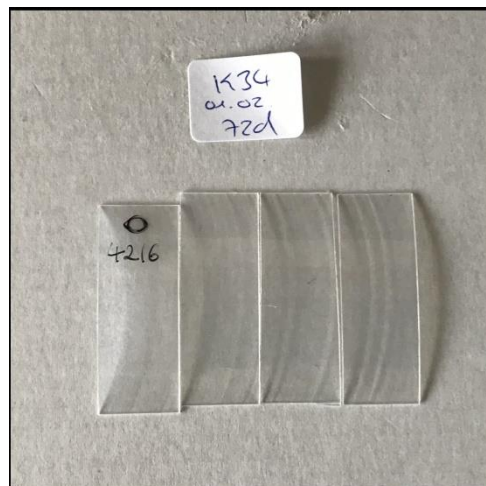

100 d

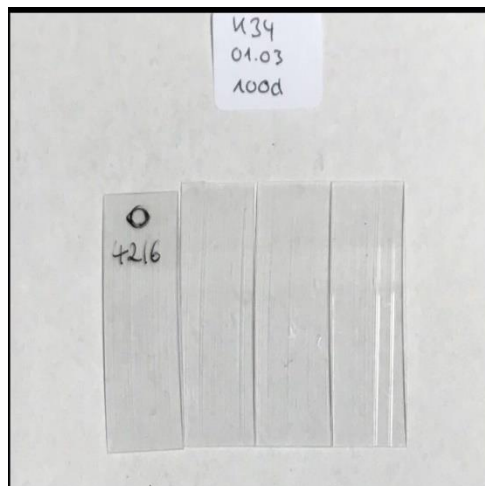

127 d

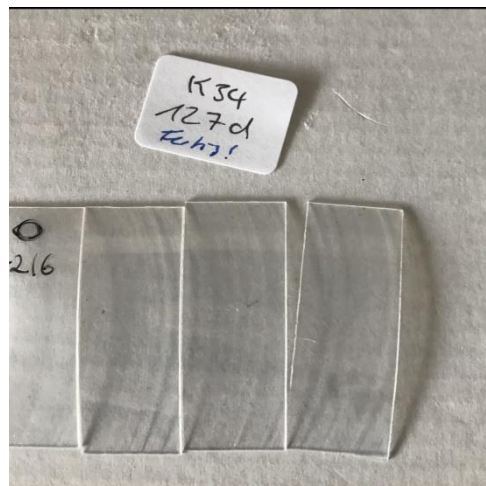

## 7 Contact with real foods

### 7.1 Milk, cream and olive oil 60 d at 20 °C

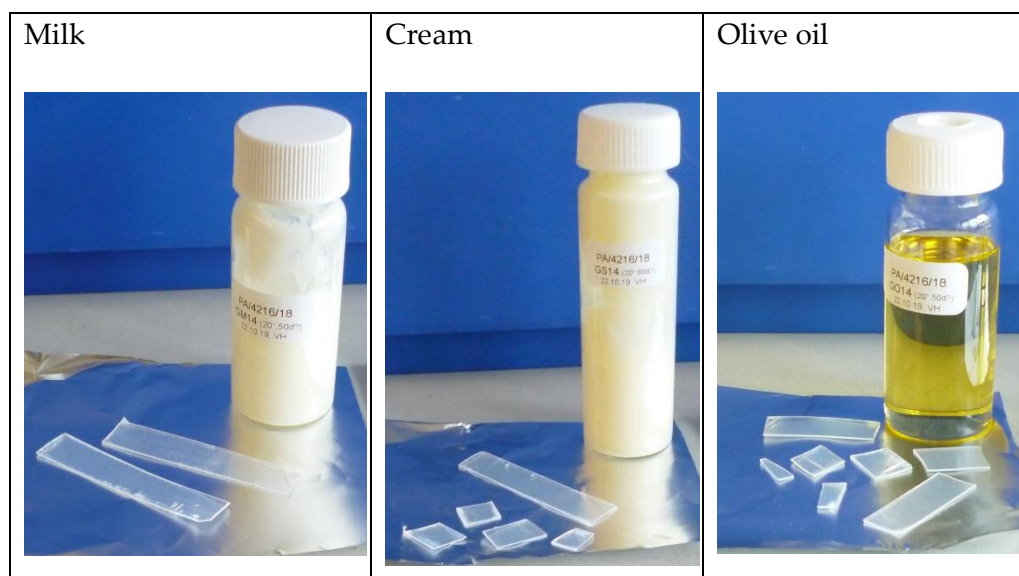

### 7.2 Milk, cream and olive oil 10 d at 40 °C

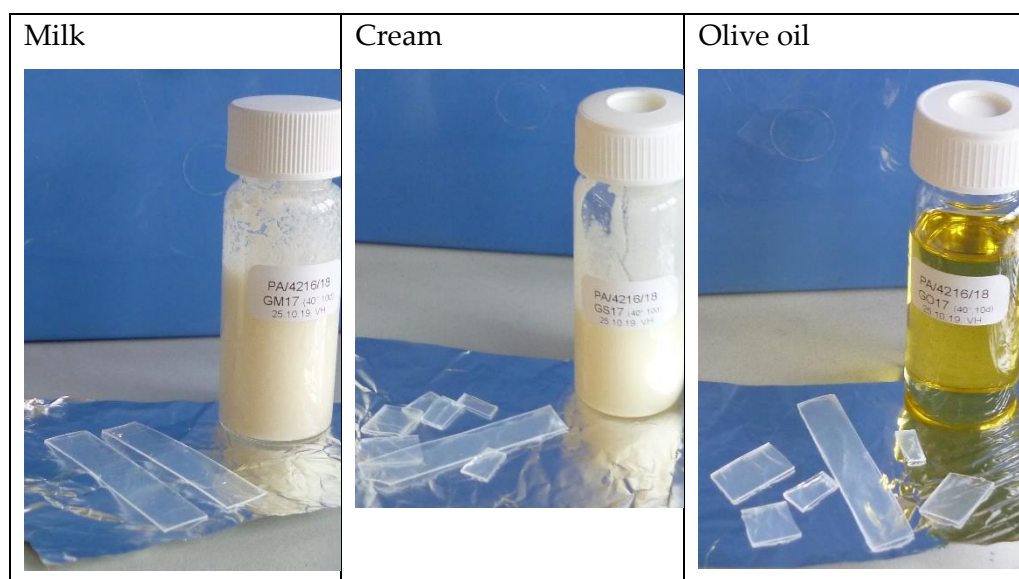



### 7.3 Lard at 5 °C

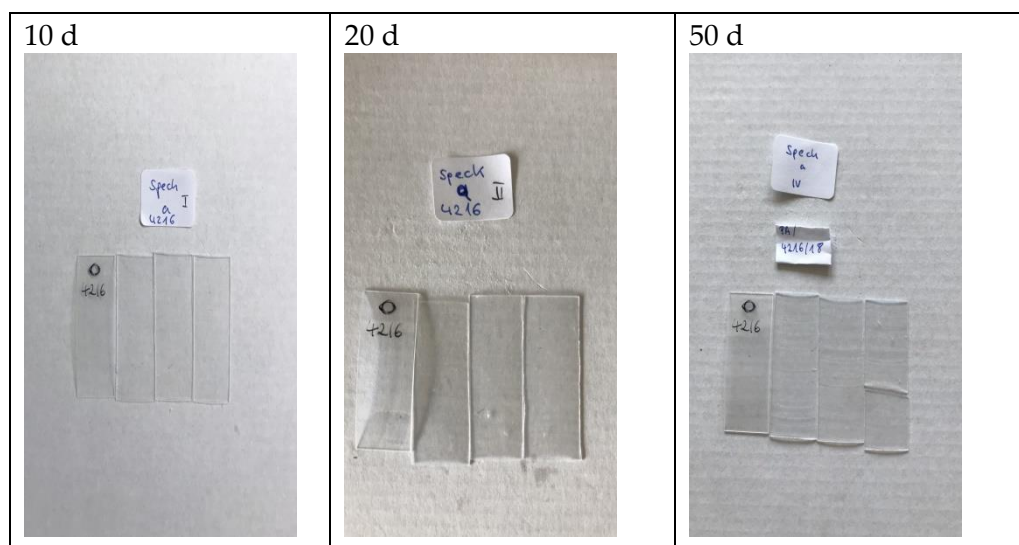

### 7.4 Butter at 5 °C

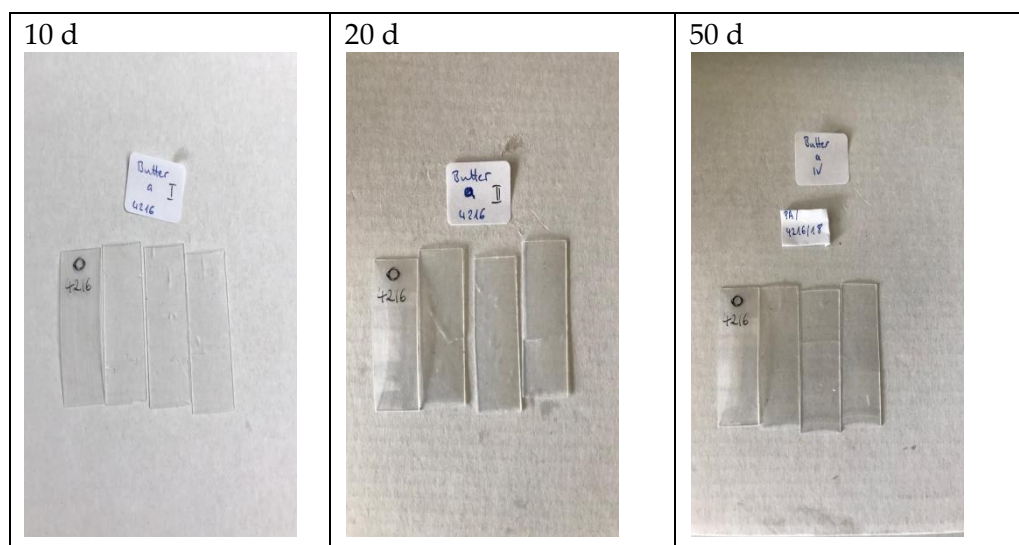

## 7.5 Fish oil at 20 °C

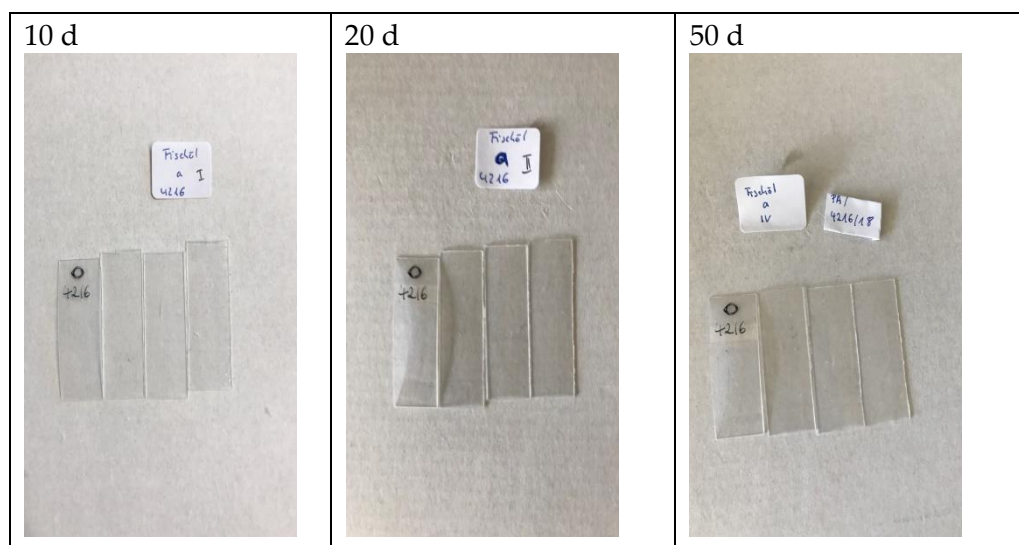

## 7.6 Miglyol® 812 at 20 °C

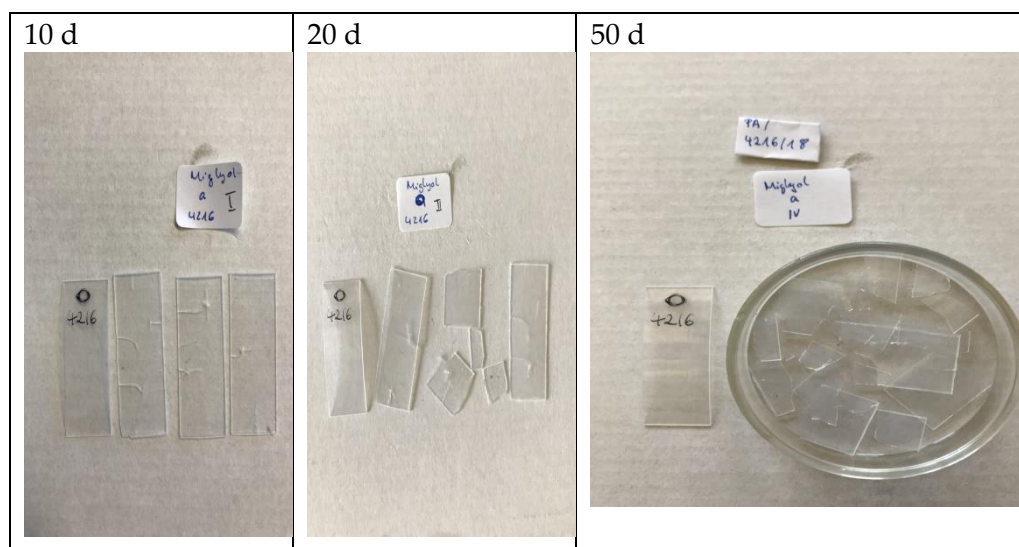

## 7.7 Clear orange juice at 20 °C

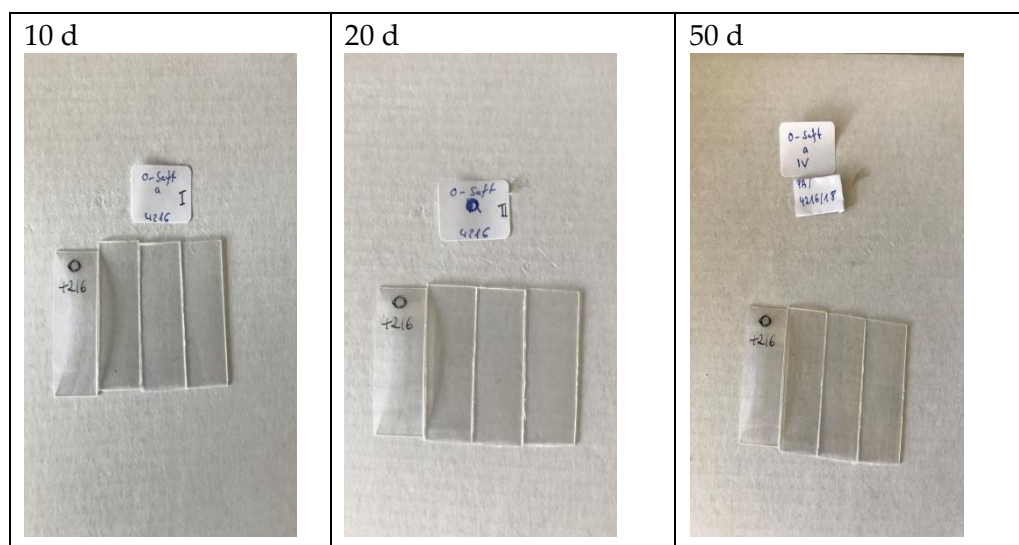

## 7.8 Ground coffee beans at 20 °C

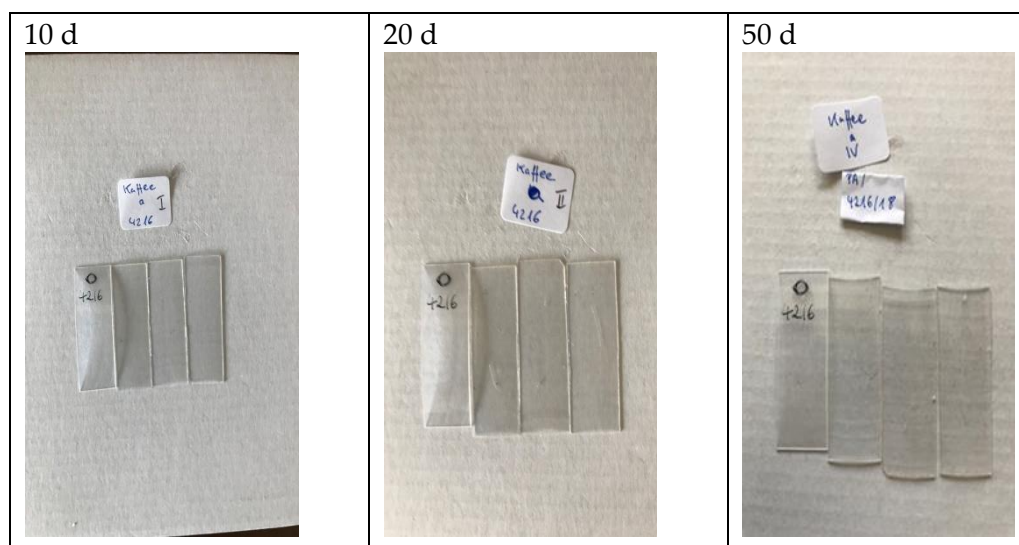

## 7.9 Noodles at 20 °C

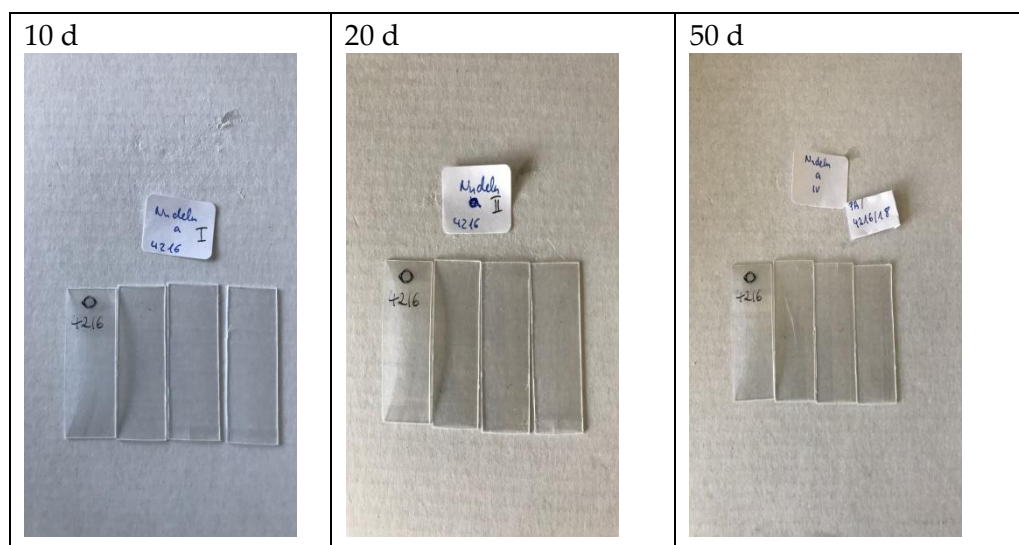

## 7.10 Oat flakes at 20 °C

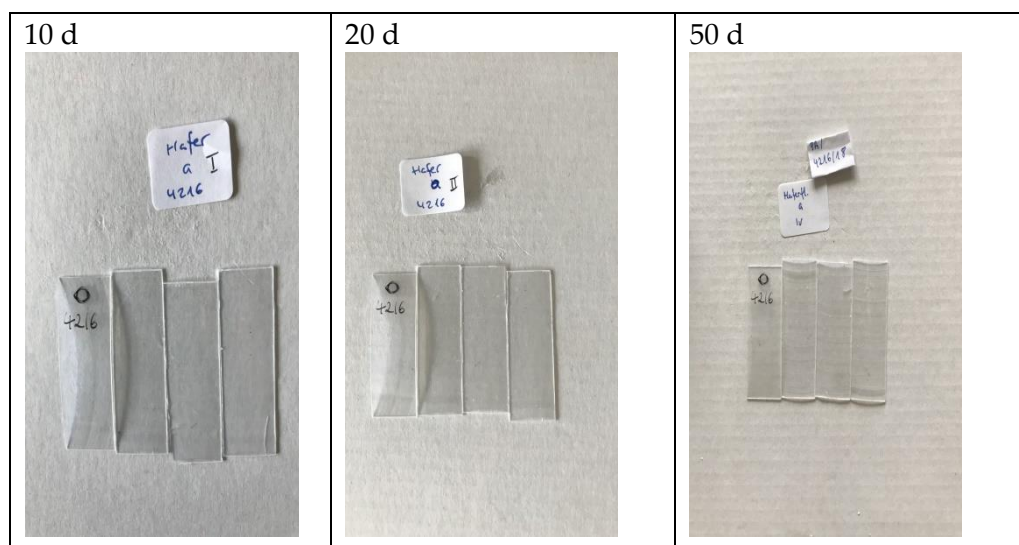

### 7.11 Wheat loops at 20 °C

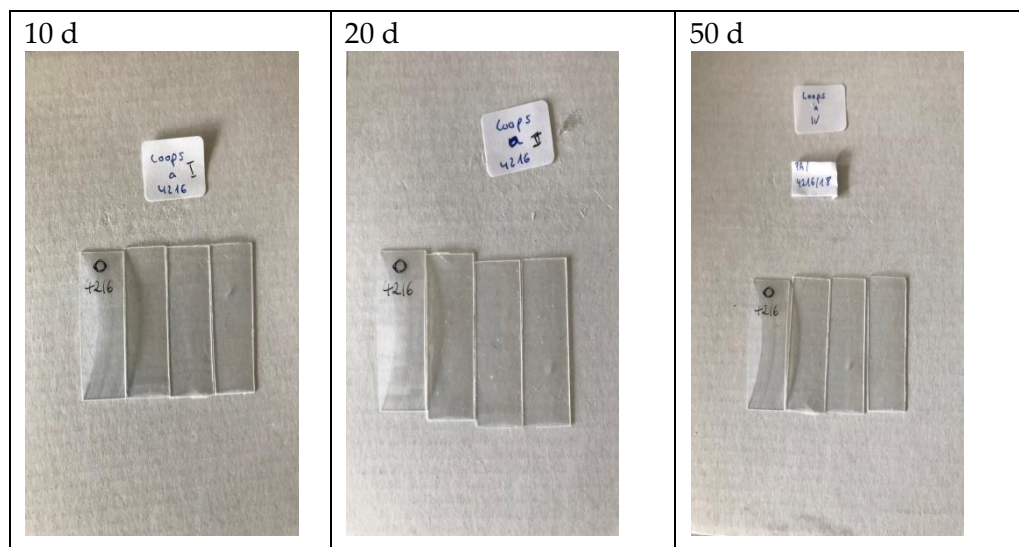

### 7.12 Water at 20 °C

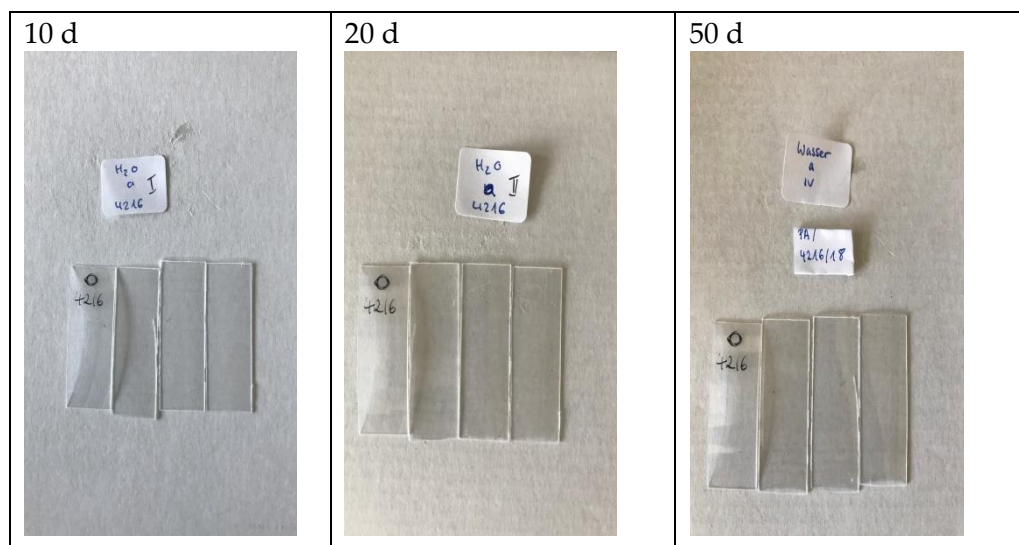





### 7.13 Water at 100 °C

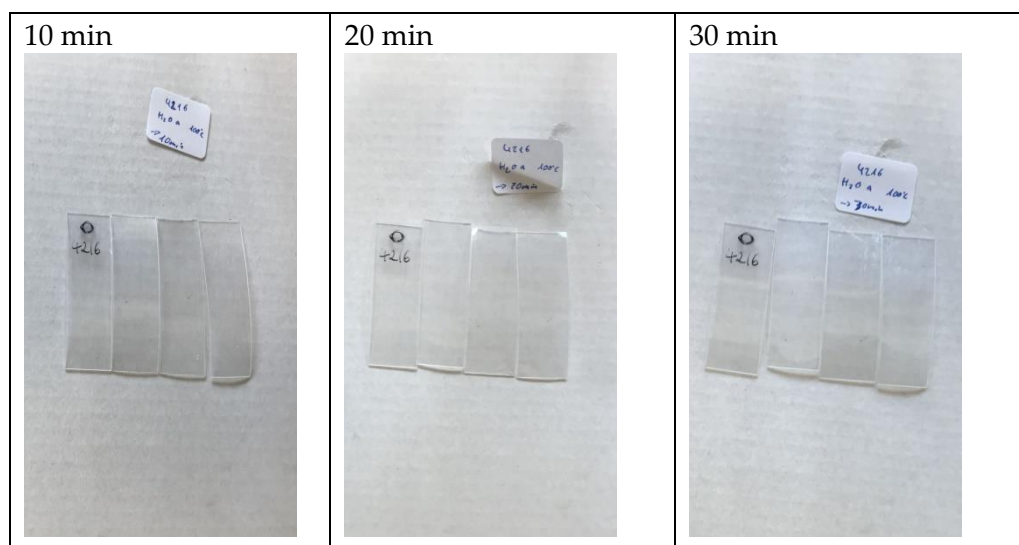

### 7.14 Water at 80 °C

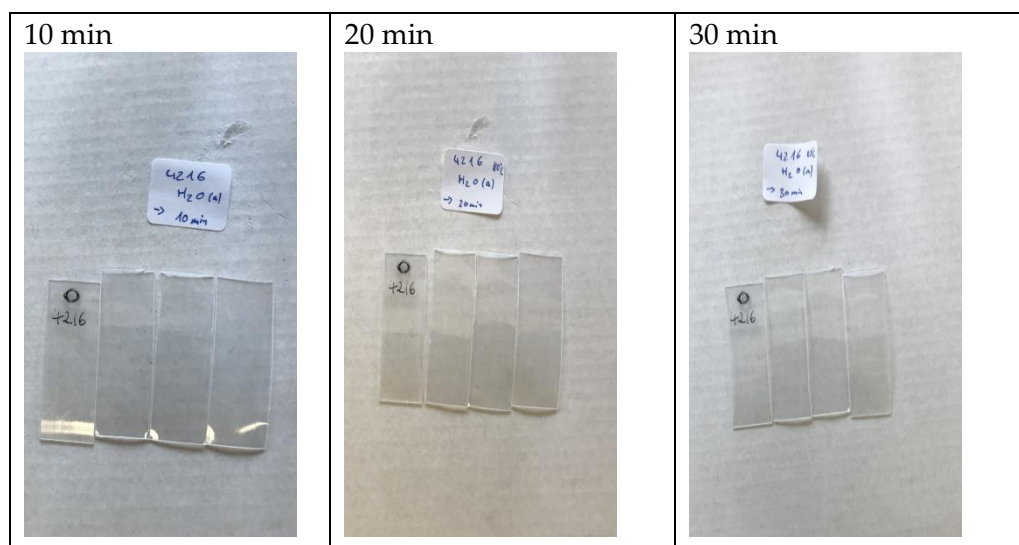

### 7.15 Water at 60 °C

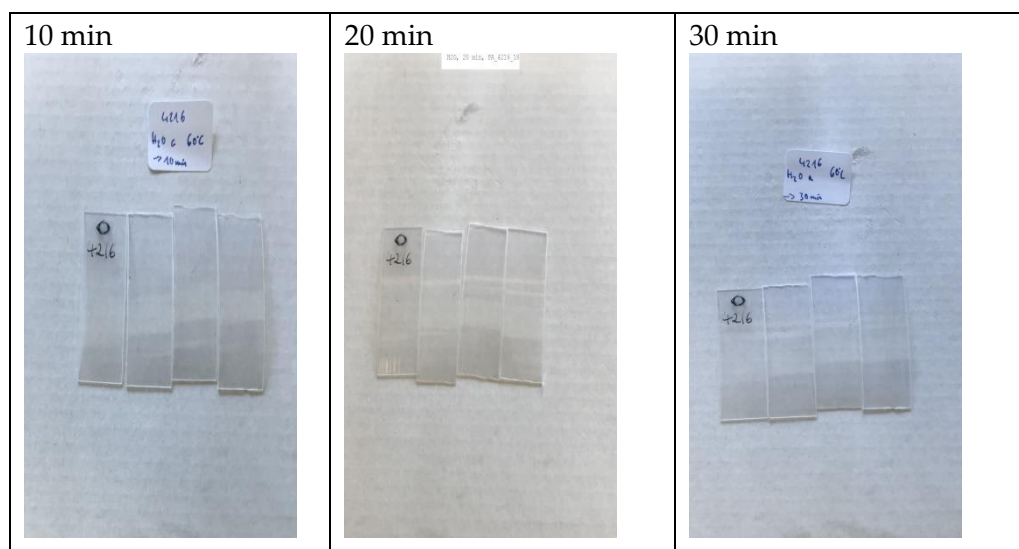

### 7.16 Water at 40 °C

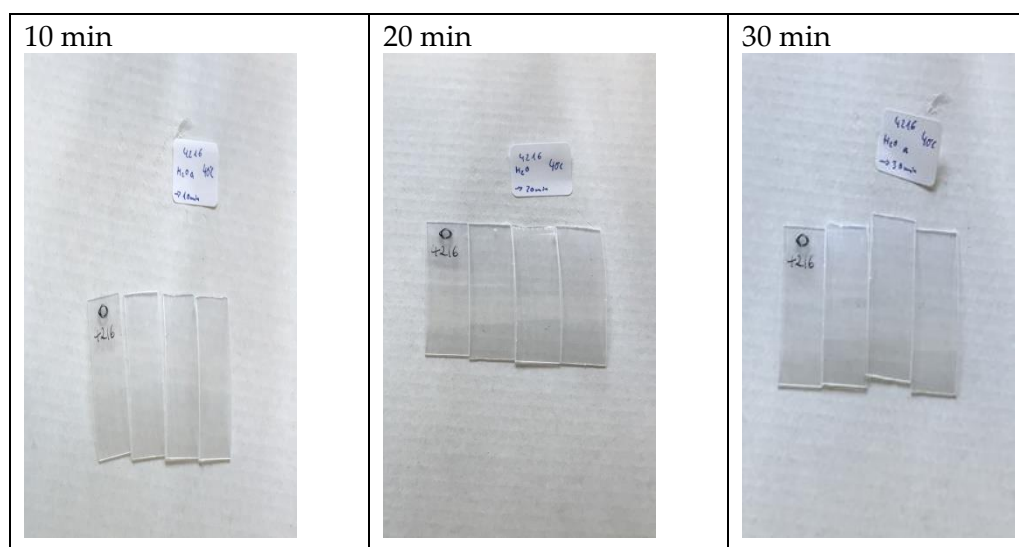

### 7.17 Brewed coffee at 90 °C

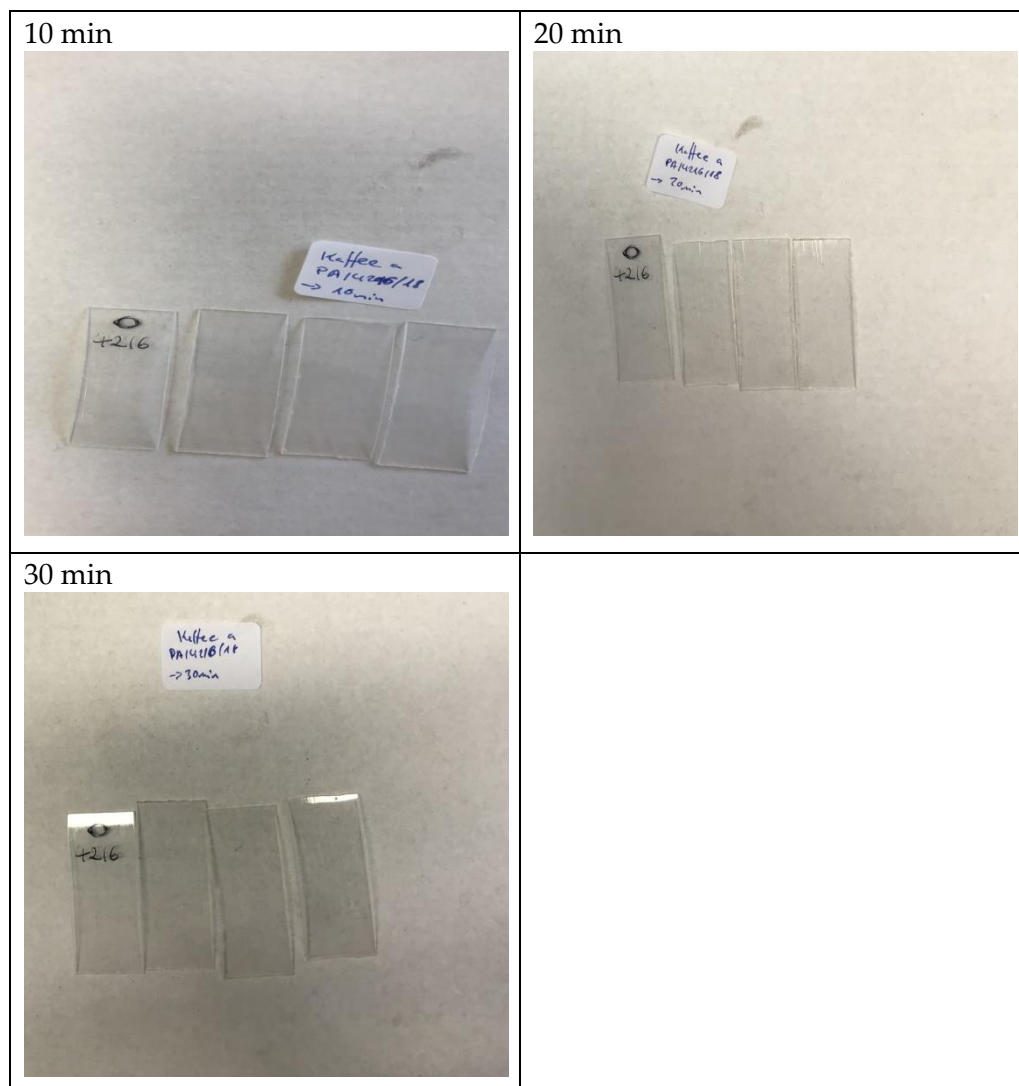

## HIPS (high impact polystyrene)

### 8 Contact with Isooctane

#### 8.1 Isooctane at 60 °C

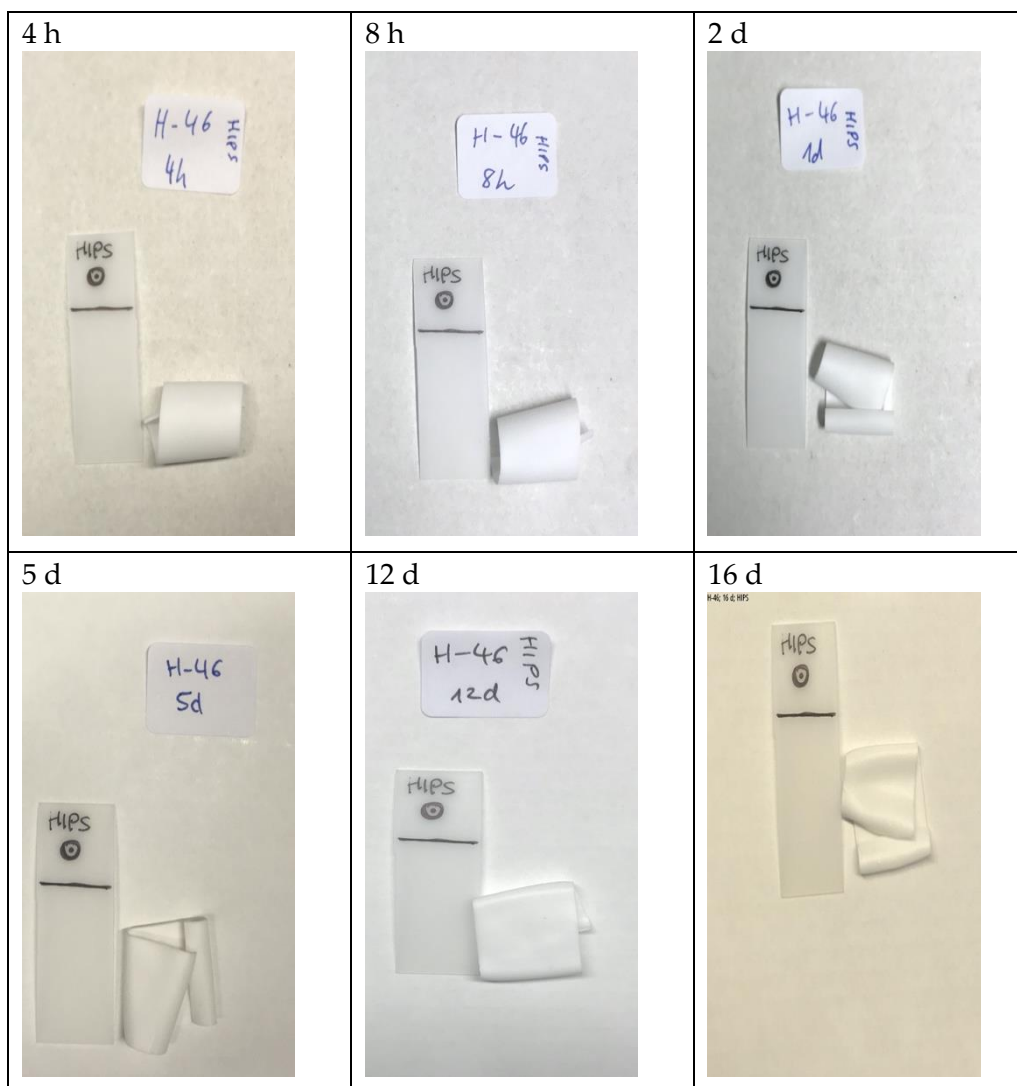



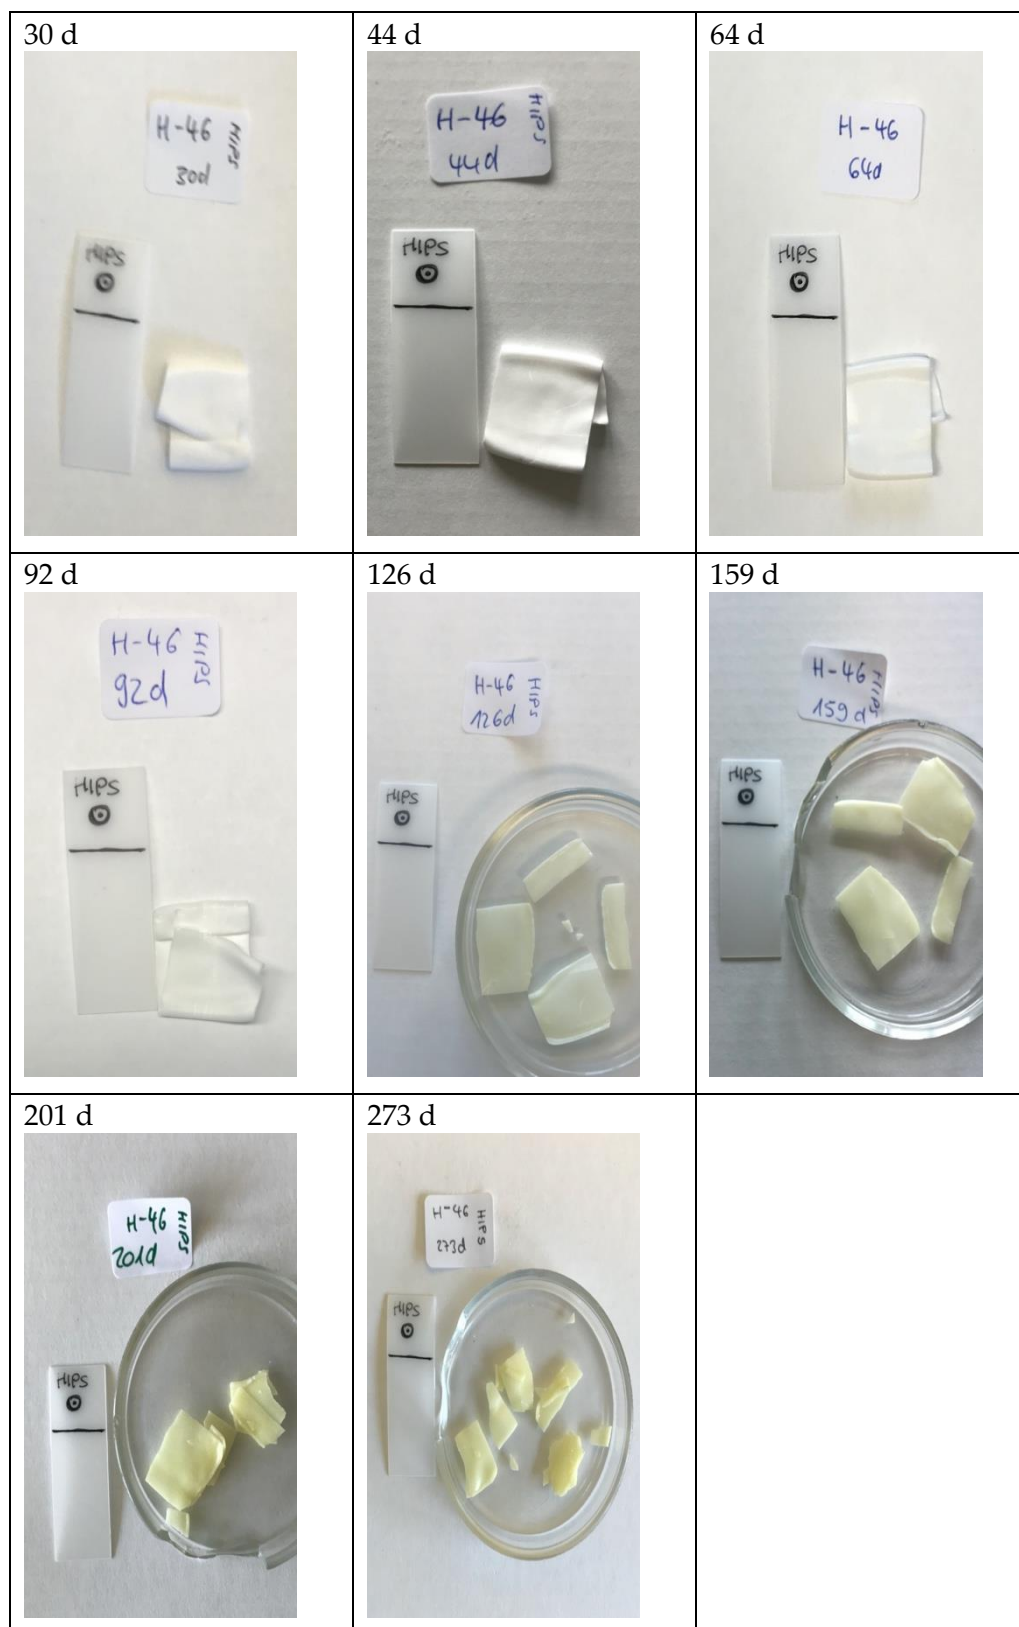



## 8.2 Isooctane at 40 °C

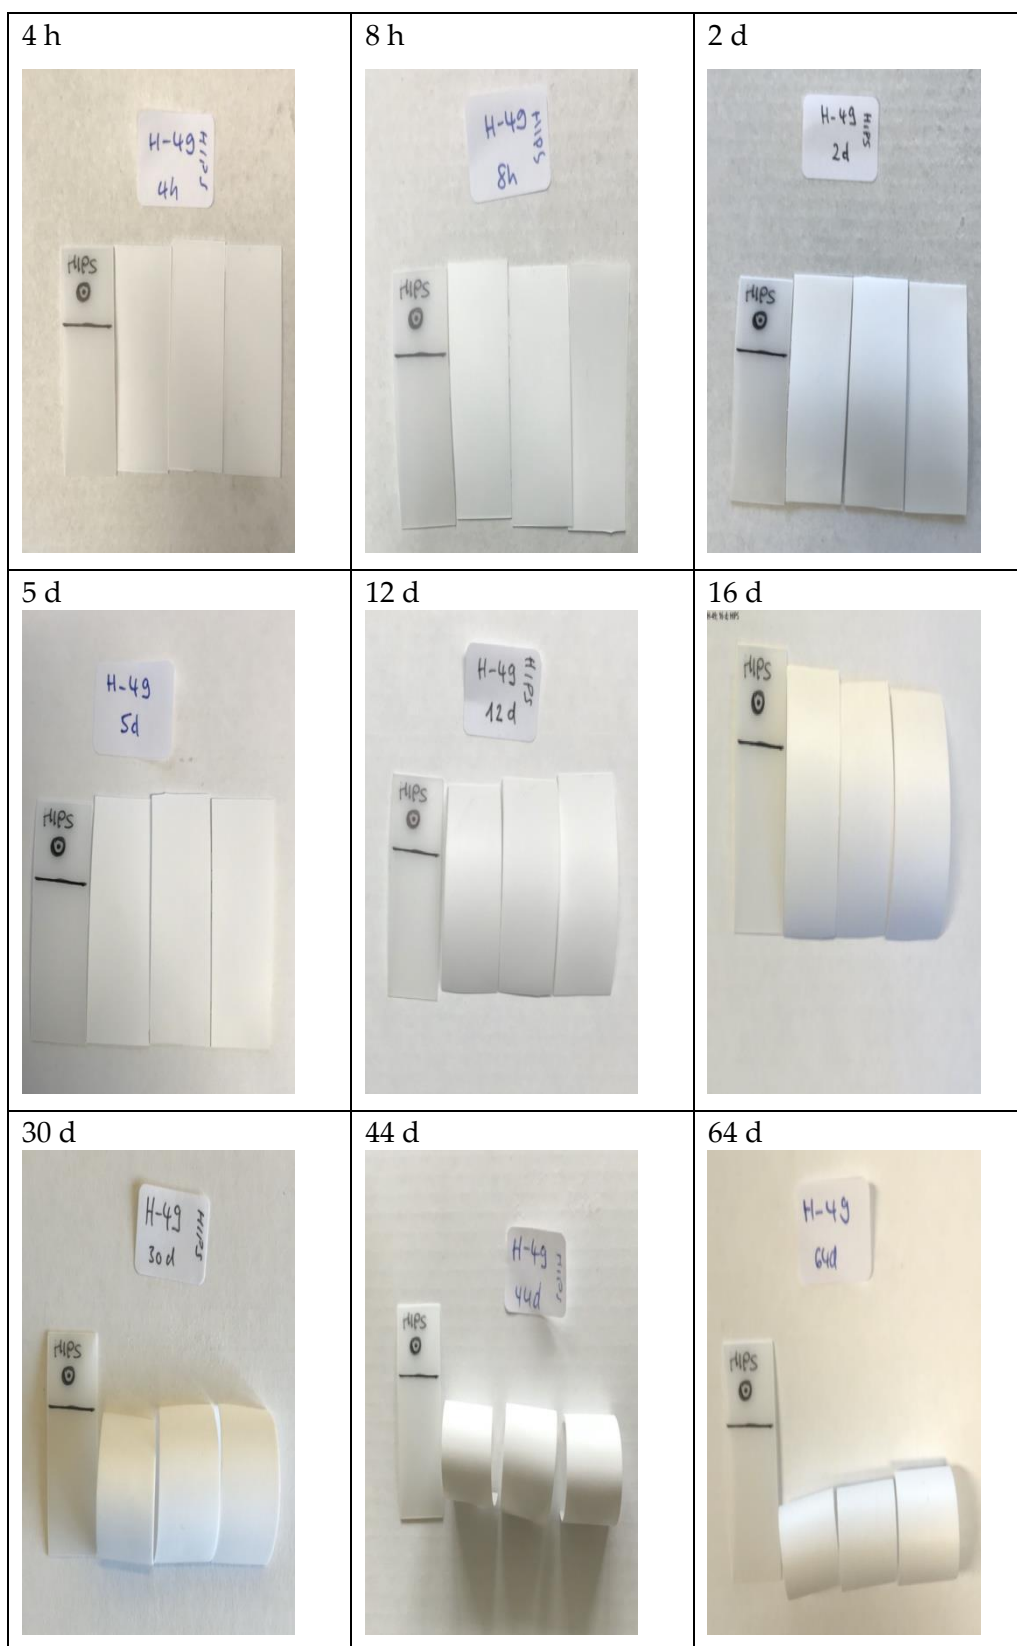

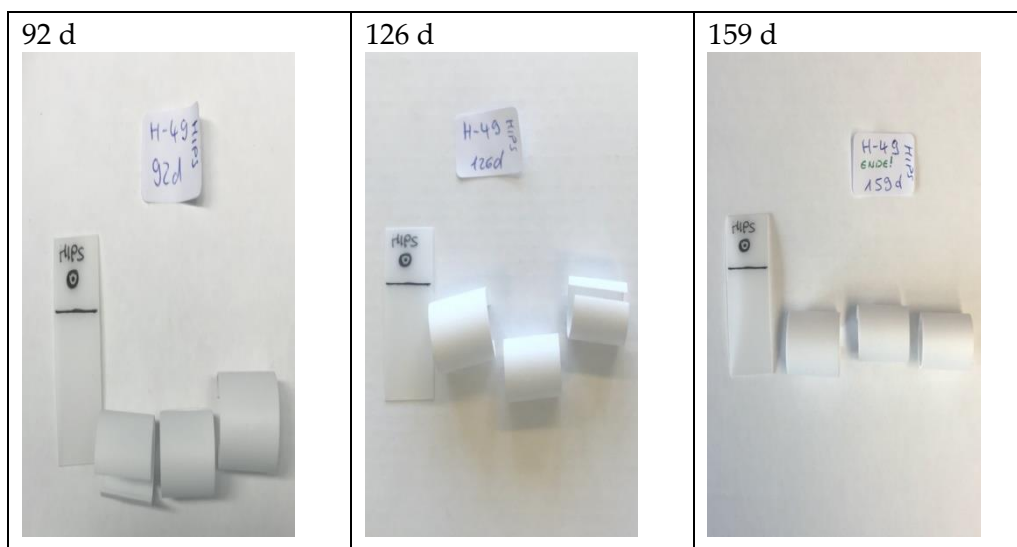

### 8.3 Isooctane at 20 °C

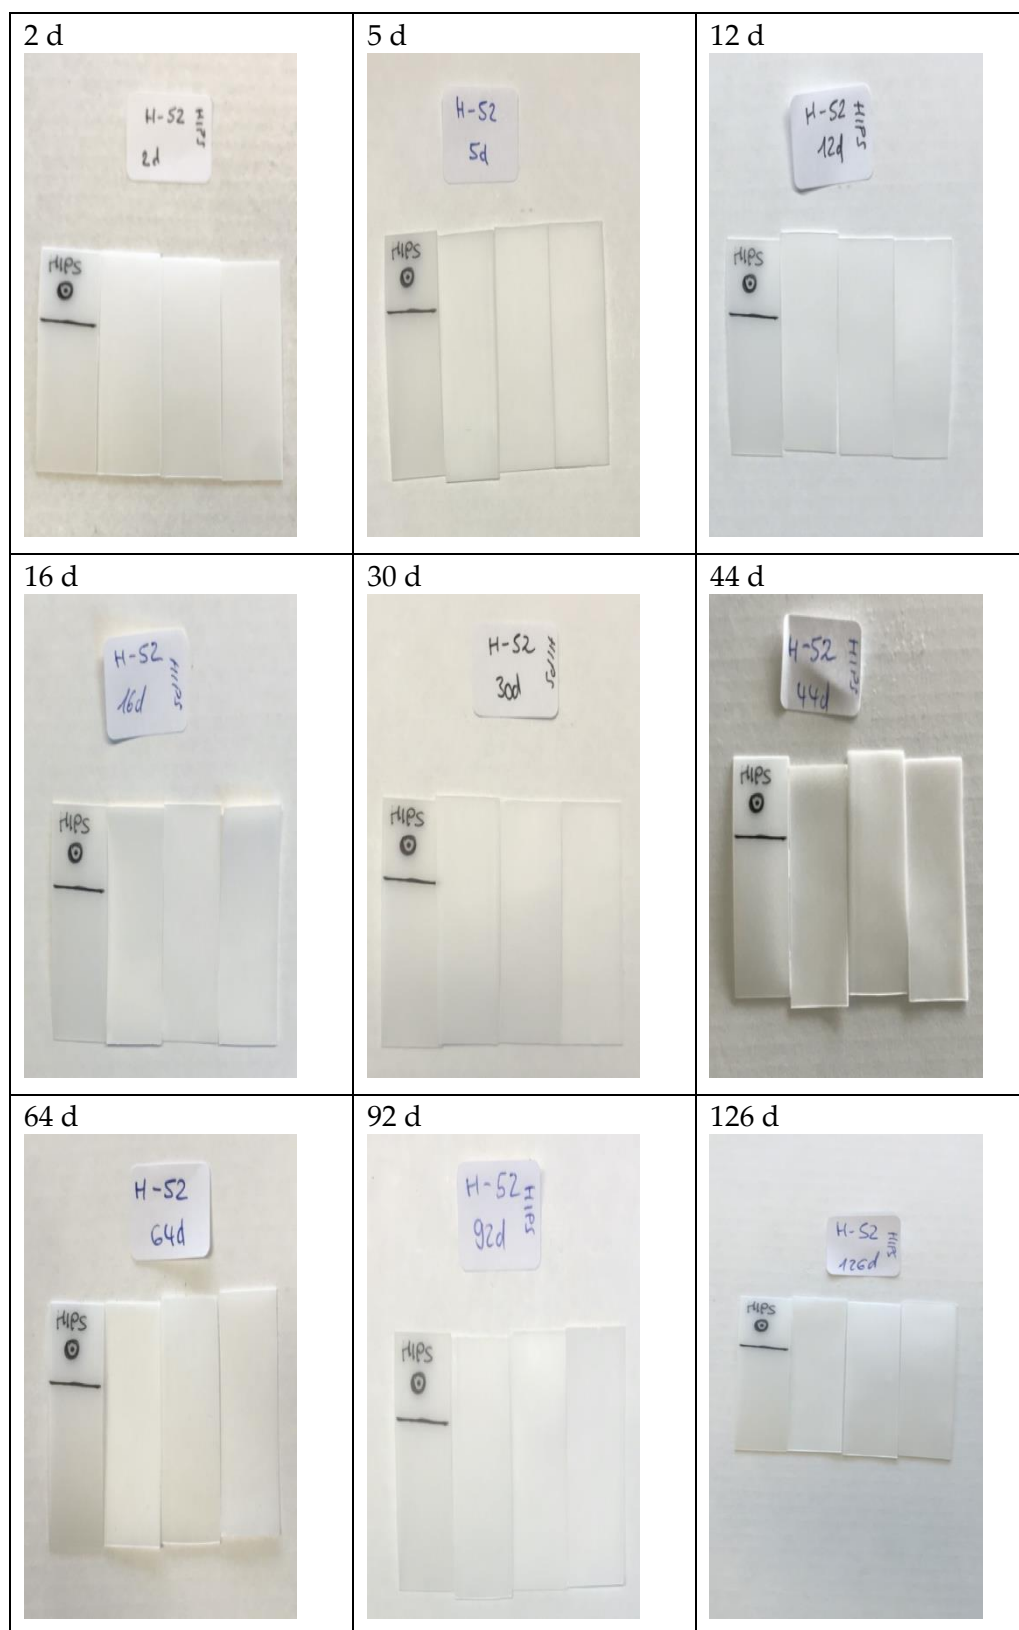



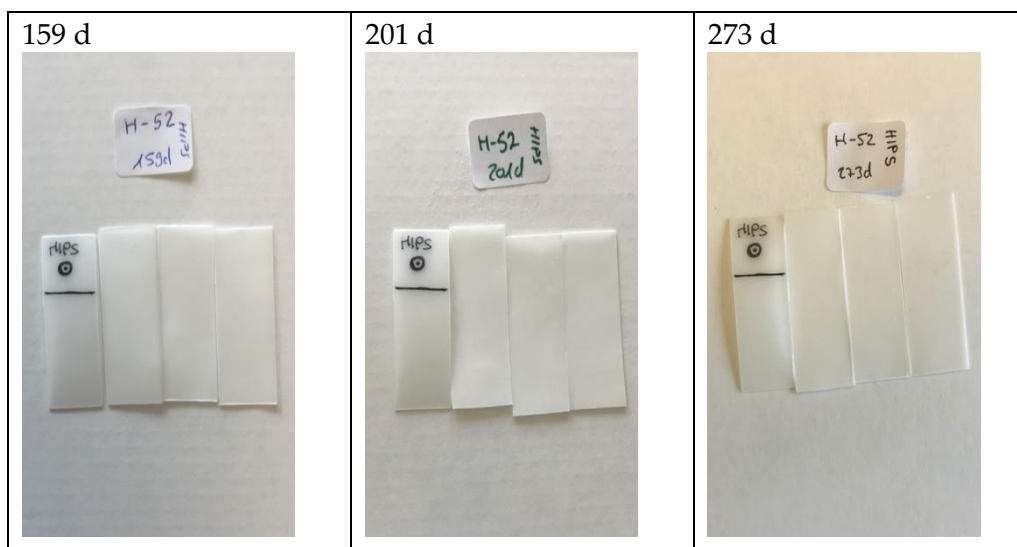

## 9 Contact with 95% Ethanol

### 9.1 95% Ethanol at 60 °C

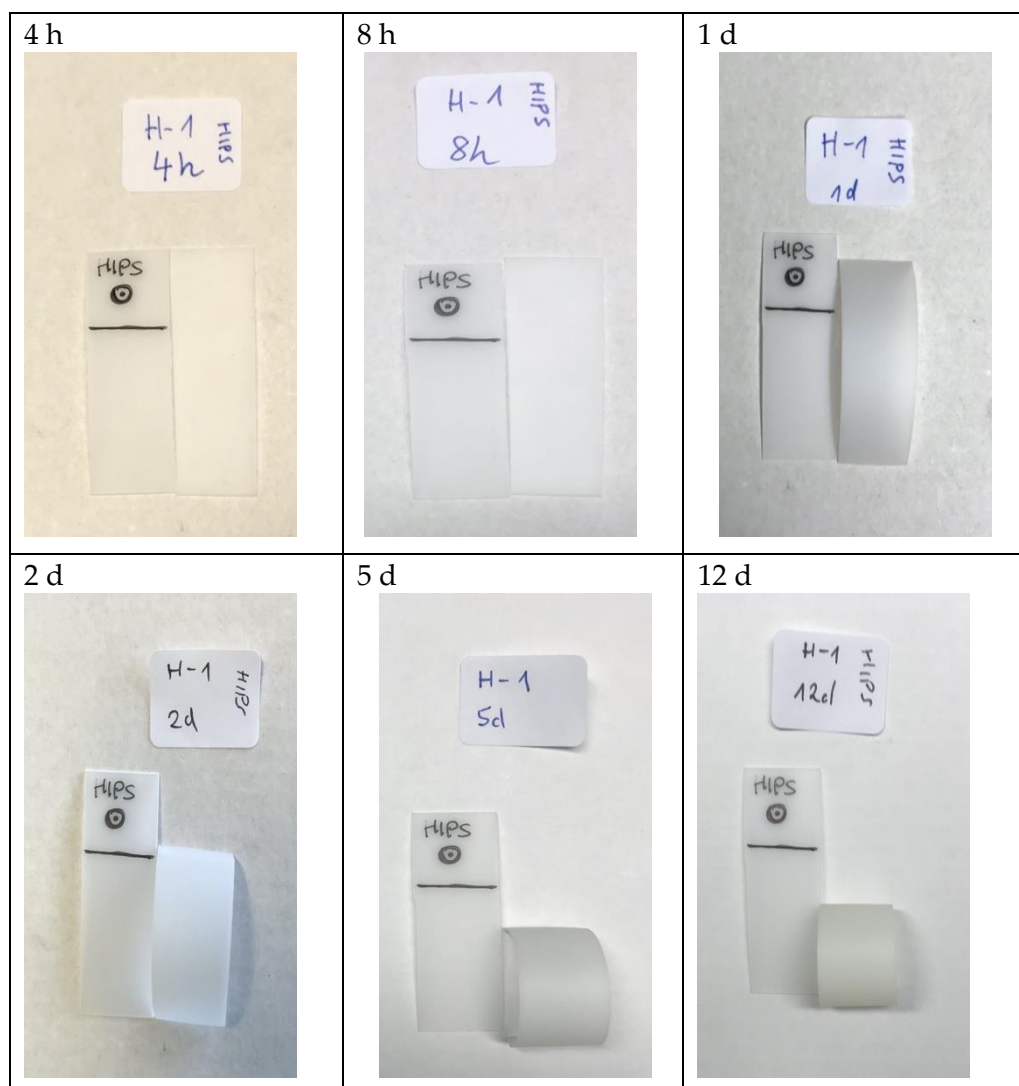

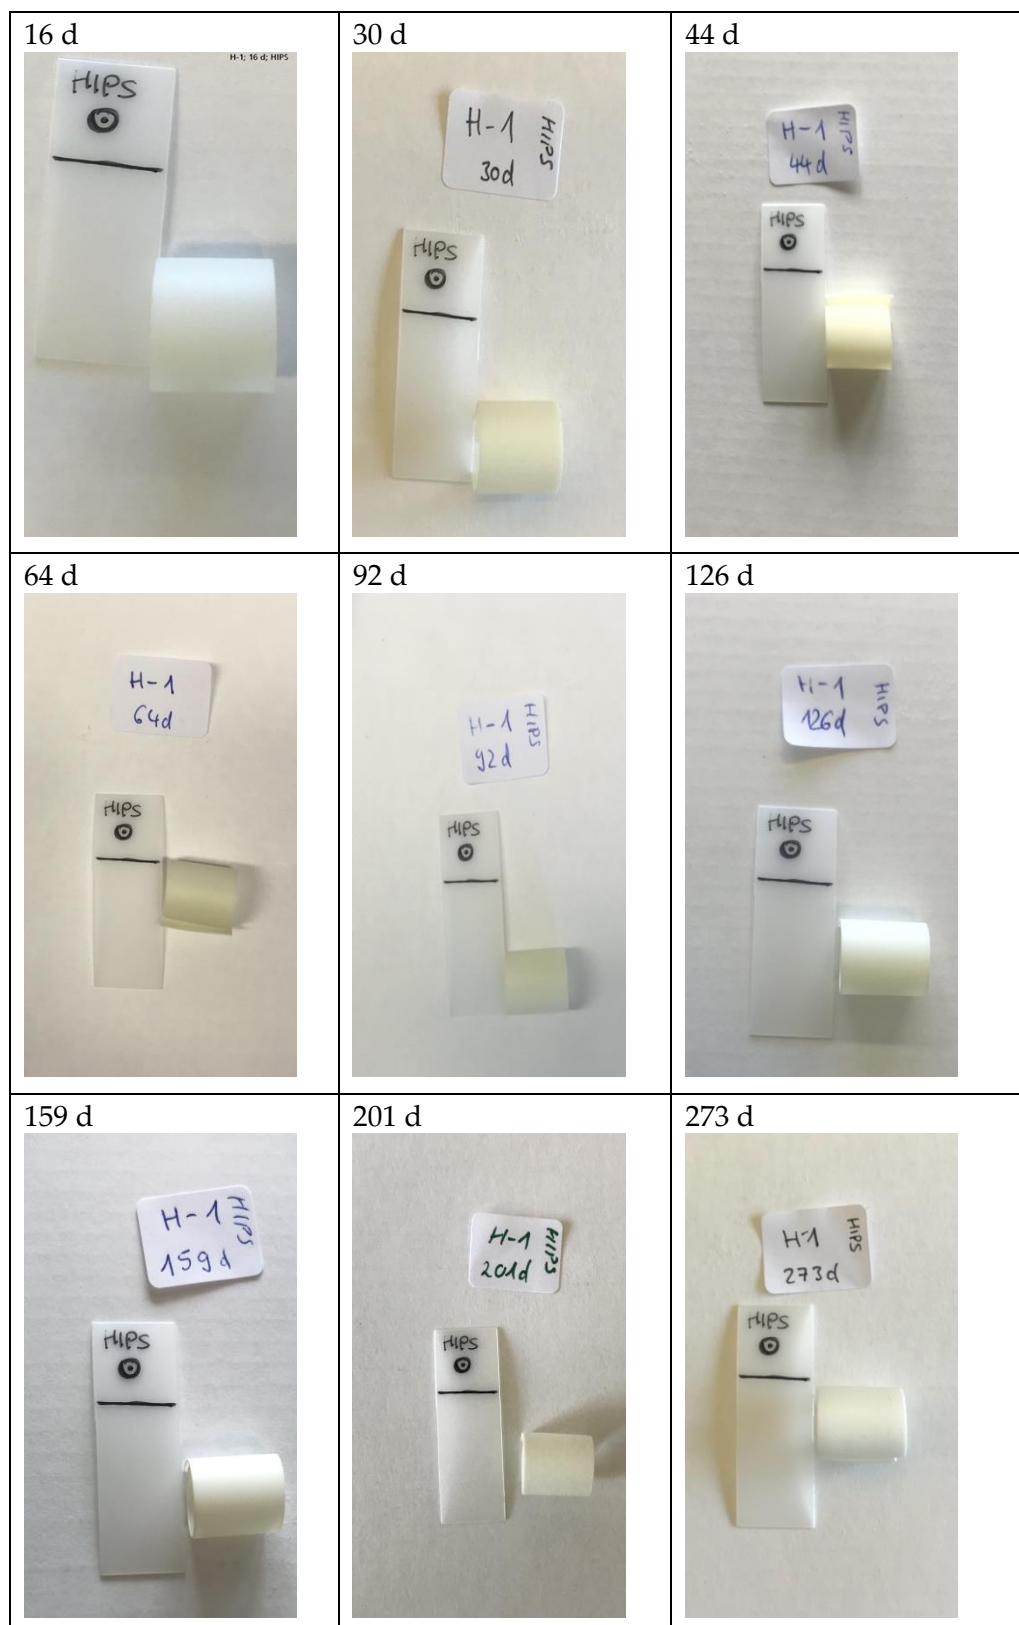

## 9.2 95% Ethanol at 40 °C

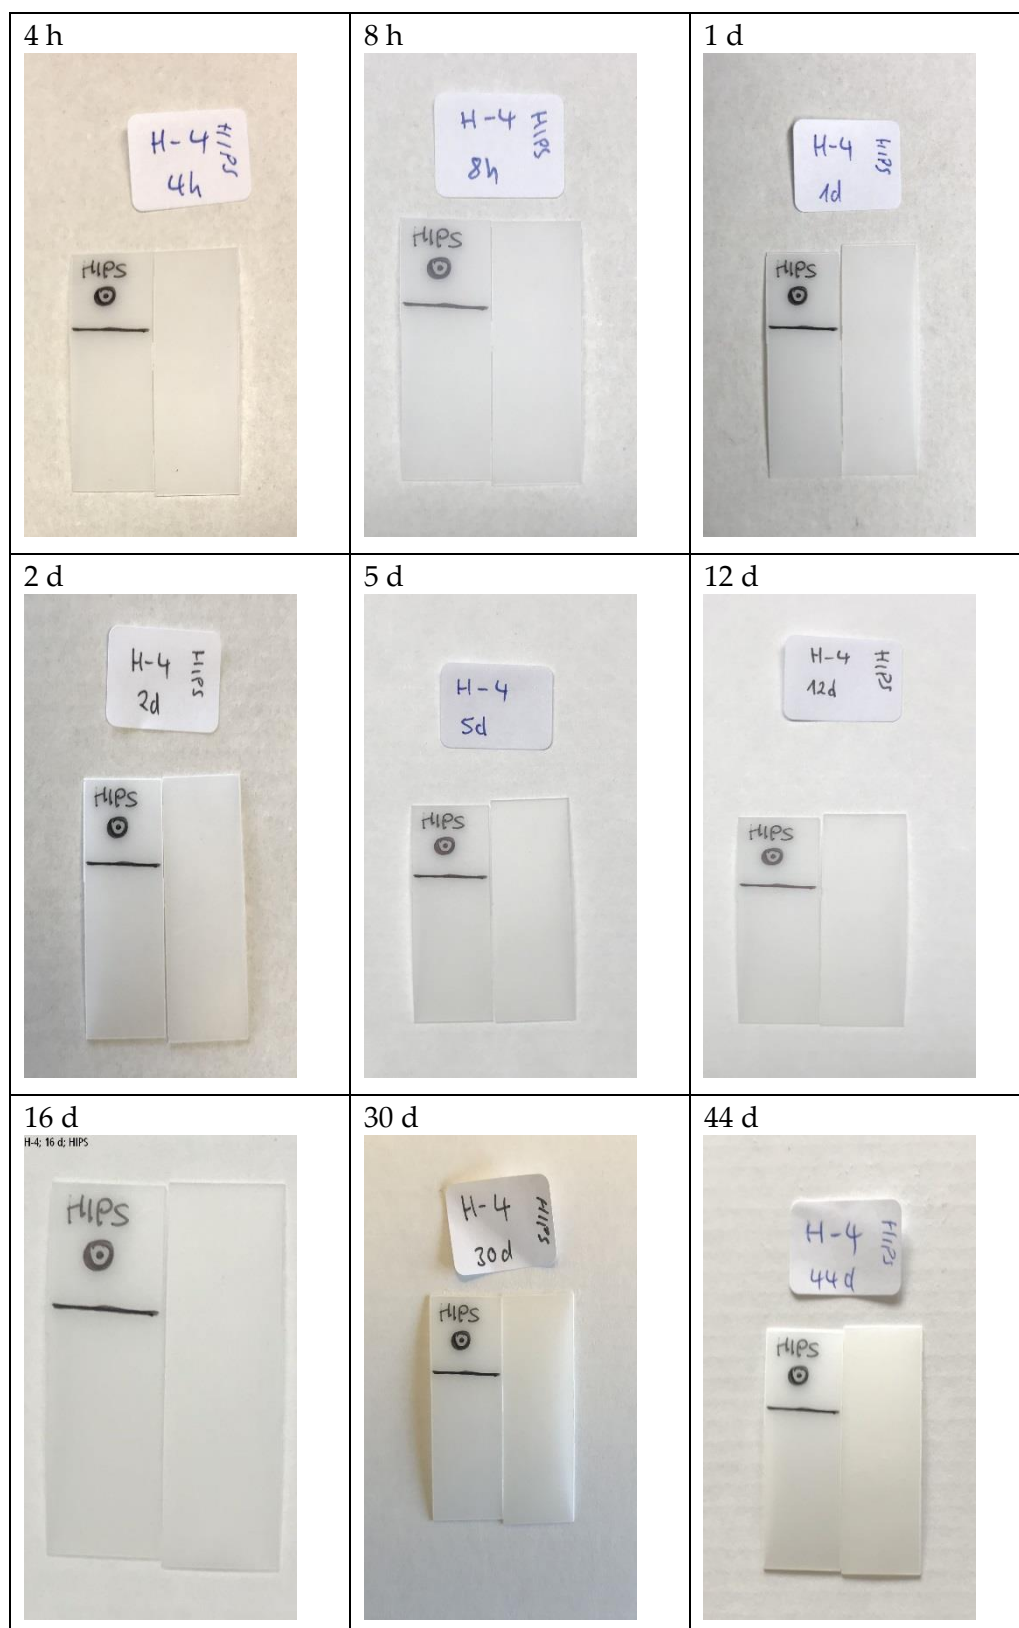

|                                                                                             |                                                                                            |                                                                                              |
|---------------------------------------------------------------------------------------------|--------------------------------------------------------------------------------------------|----------------------------------------------------------------------------------------------|
| 64 d<br>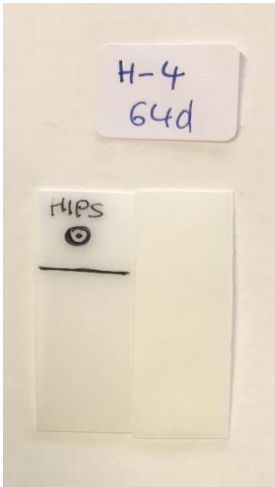   | 92 d<br> | 126 d<br> |
| 159 d<br> |                                                                                            |                                                                                              |



### 9.3 95% Ethanol at 20 °C

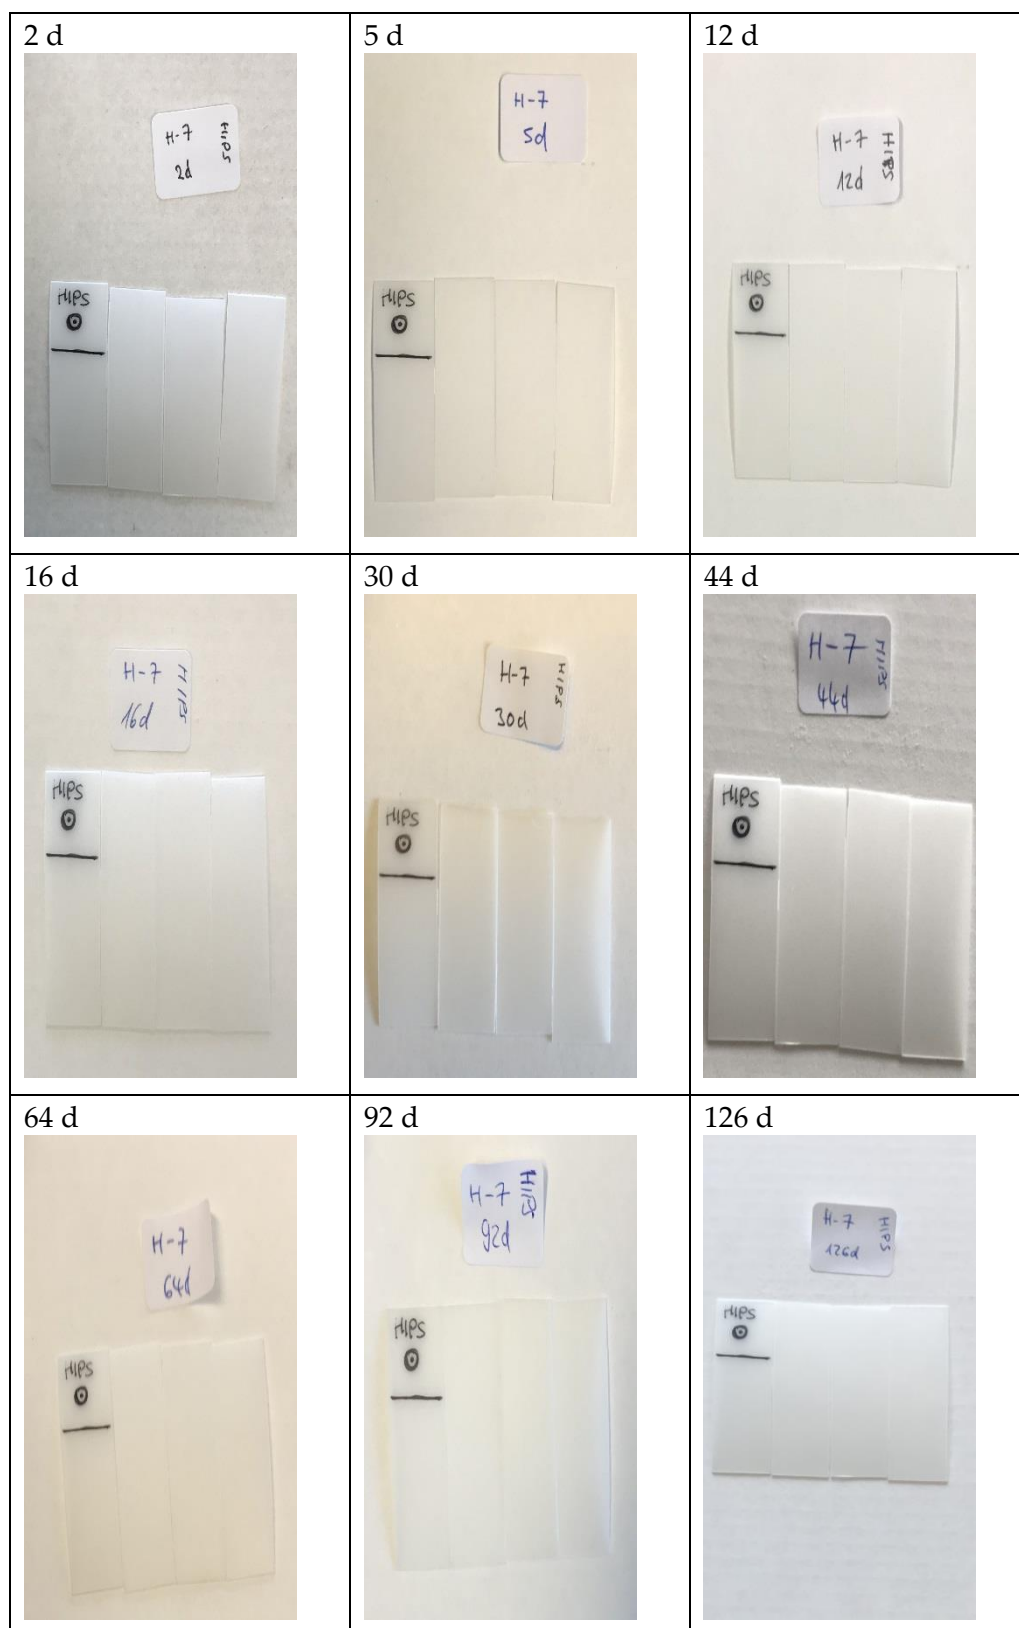

|                                                                                   |  |  |
|-----------------------------------------------------------------------------------|--|--|
| 159 d                                                                             |  |  |
|  |  |  |

## 10 Contact with 50% Ethanol

### 10.1 50% Ethanol at 60 °C

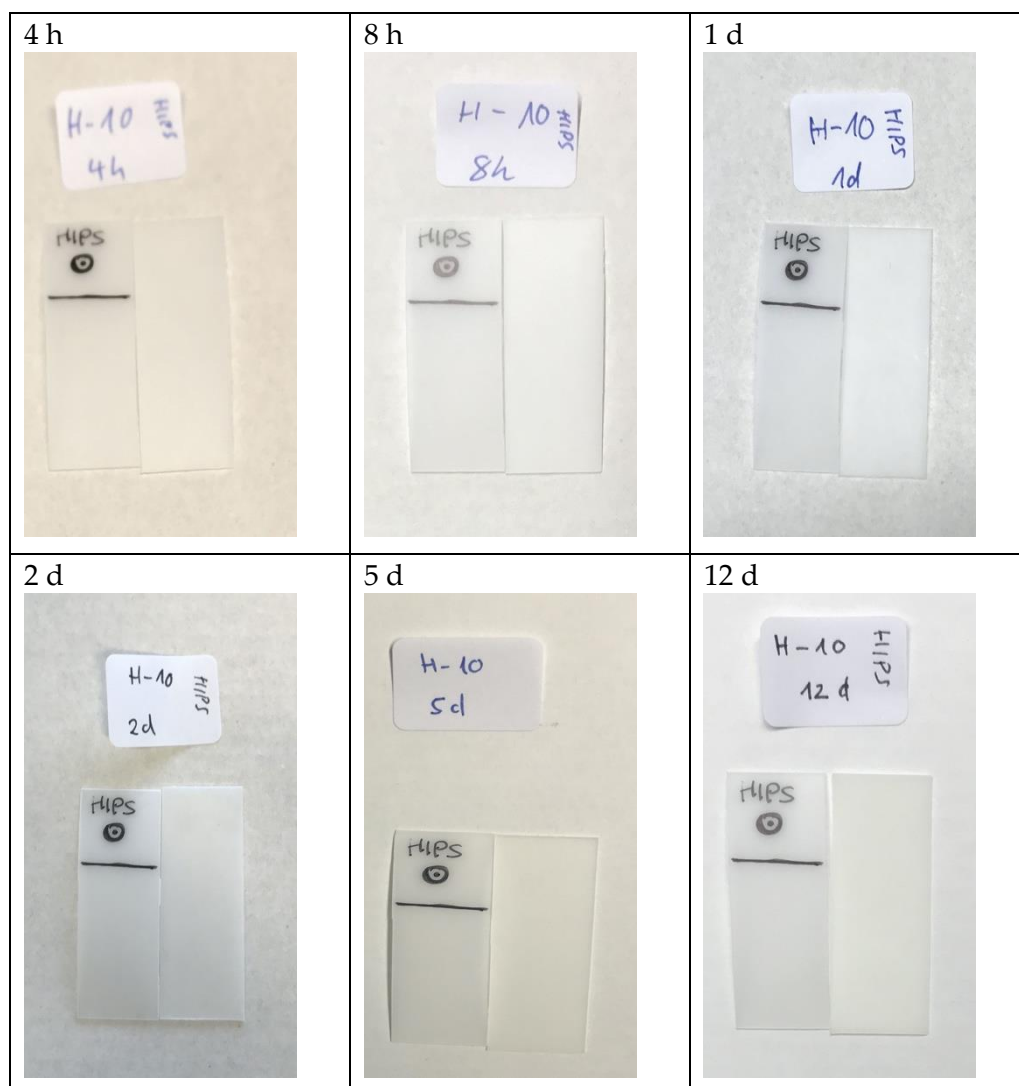

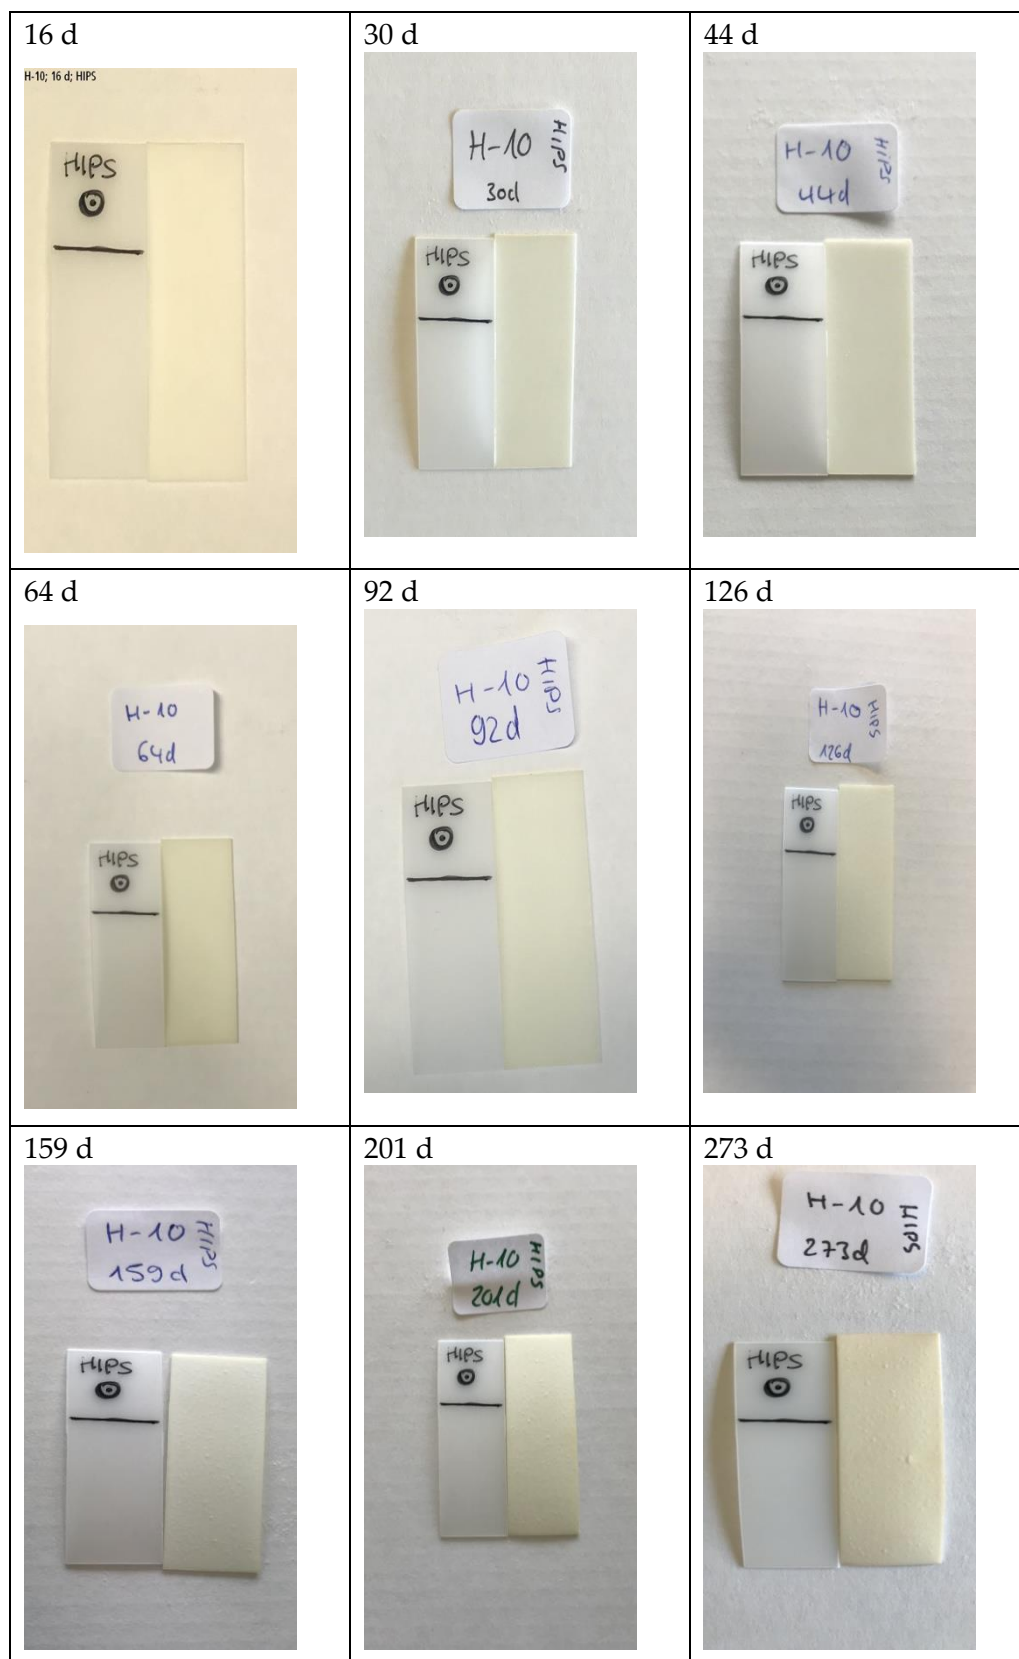

## 10.2 50% Ethanol at 40 °C

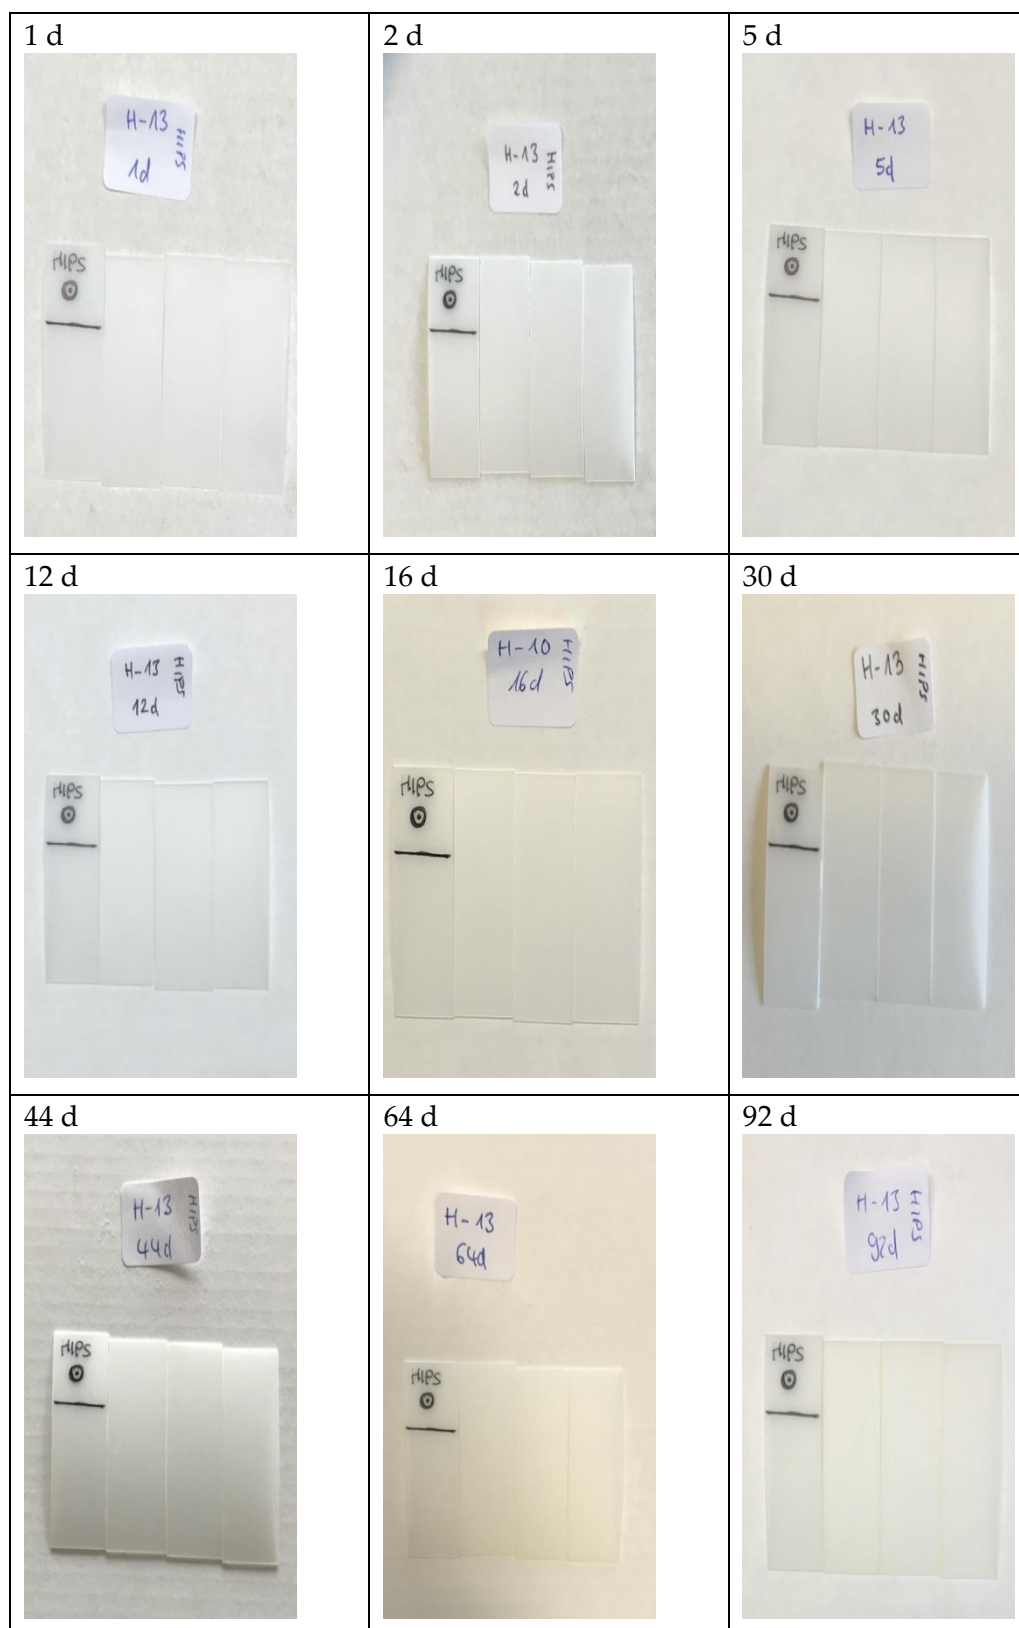



|                                                                                                |                                                                                                 |  |
|------------------------------------------------------------------------------------------------|-------------------------------------------------------------------------------------------------|--|
| <p>126 d</p>  | <p>159 d</p>  |  |
|------------------------------------------------------------------------------------------------|-------------------------------------------------------------------------------------------------|--|

### 10.3 50% Ethanol at 20 °C

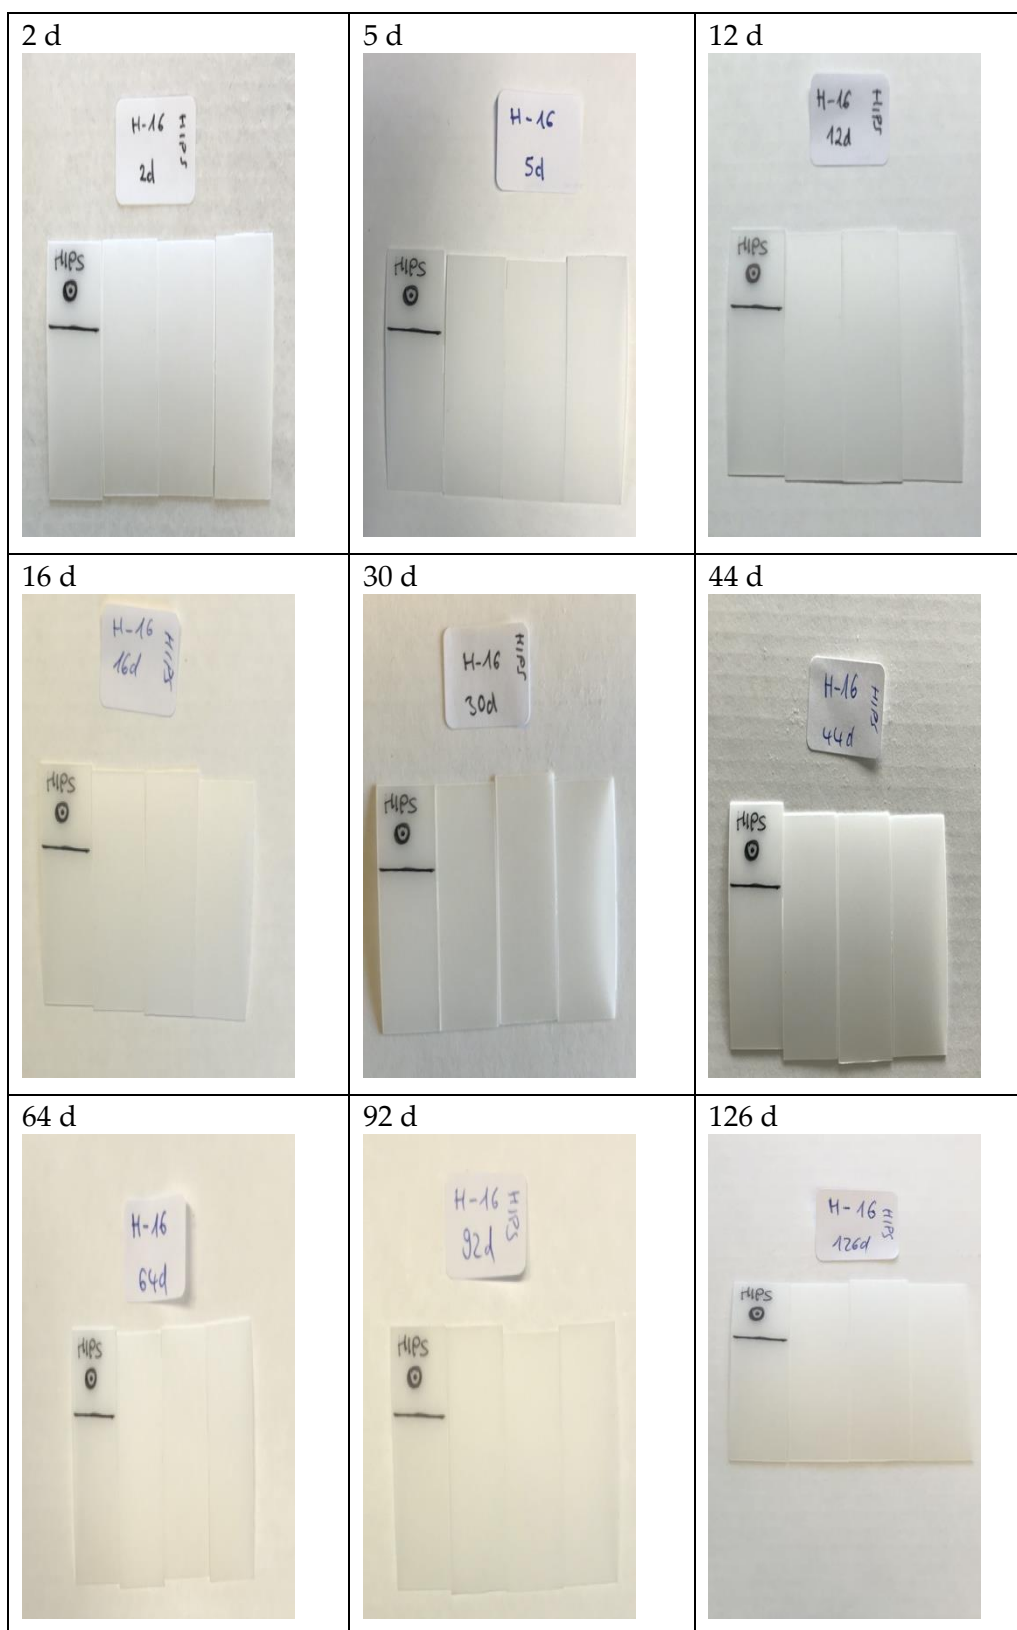

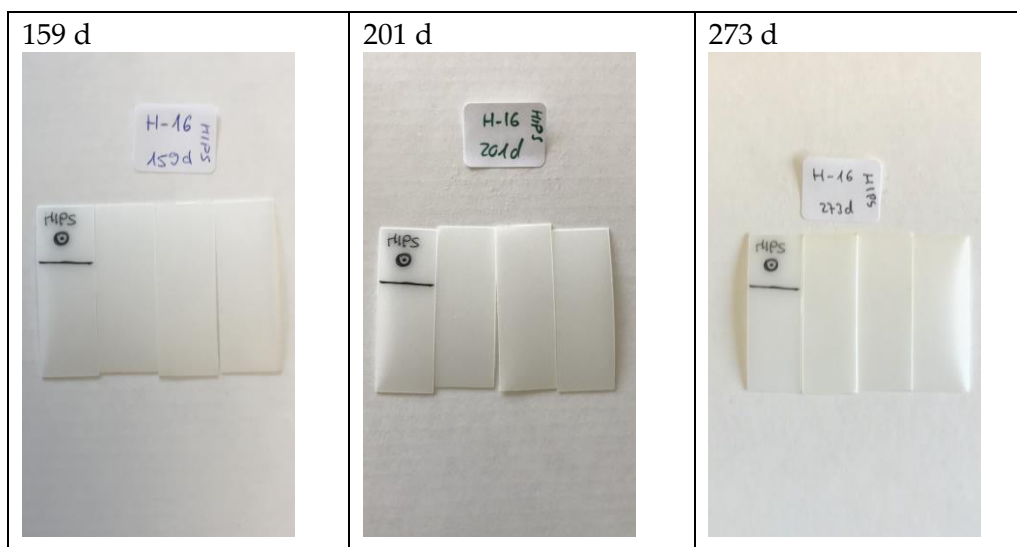

## 11 Contact with 20% Ethanol

### 11.1 20% Ethanol at 60 °C

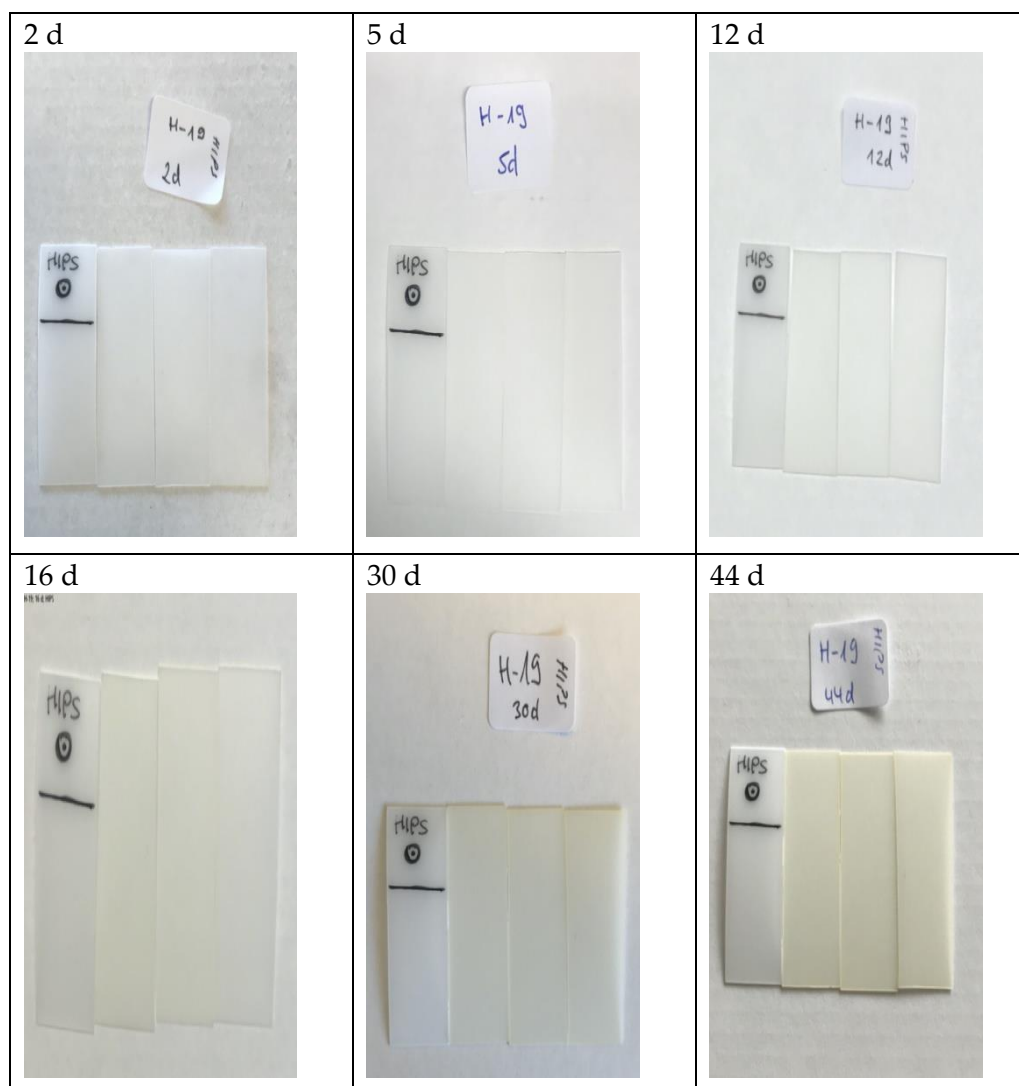

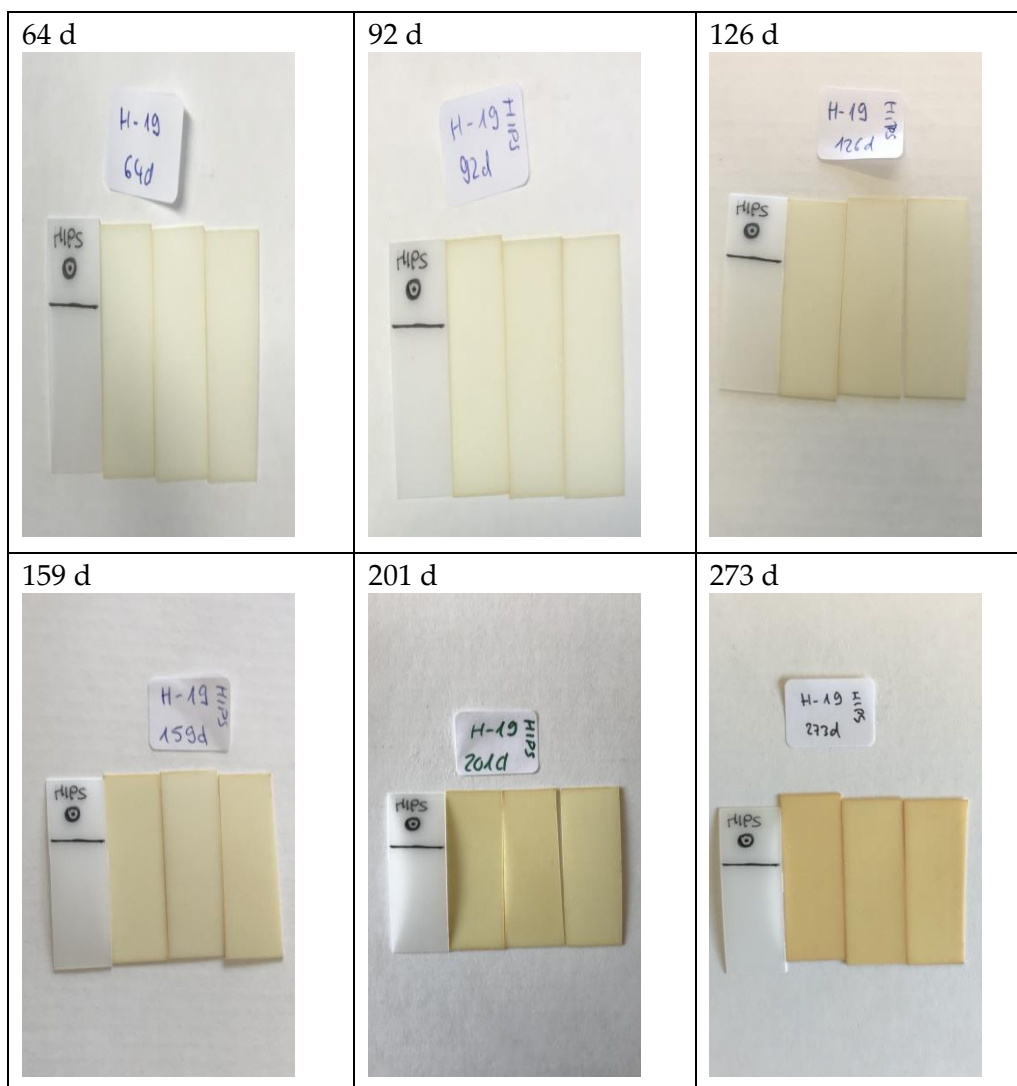



## 11.2 20% Ethanol at 40 °C

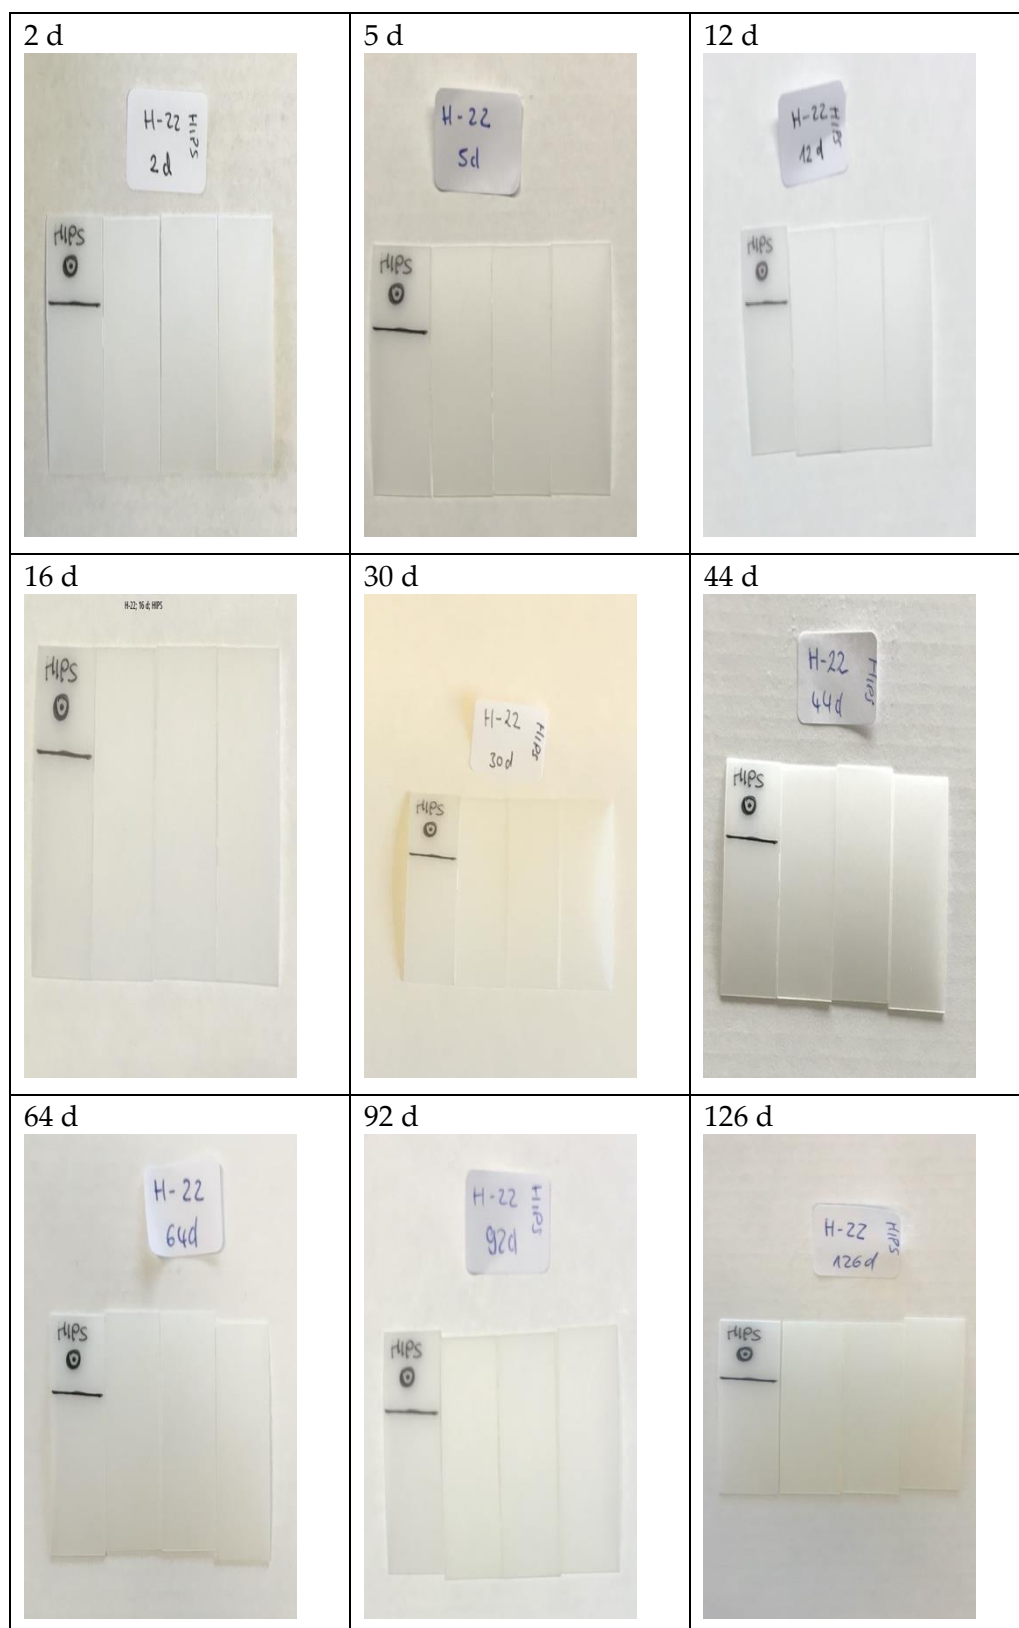

|                                                                                            |  |  |
|--------------------------------------------------------------------------------------------|--|--|
| 159 d<br> |  |  |
|--------------------------------------------------------------------------------------------|--|--|

### 11.3 20% Ethanol at 20 °C

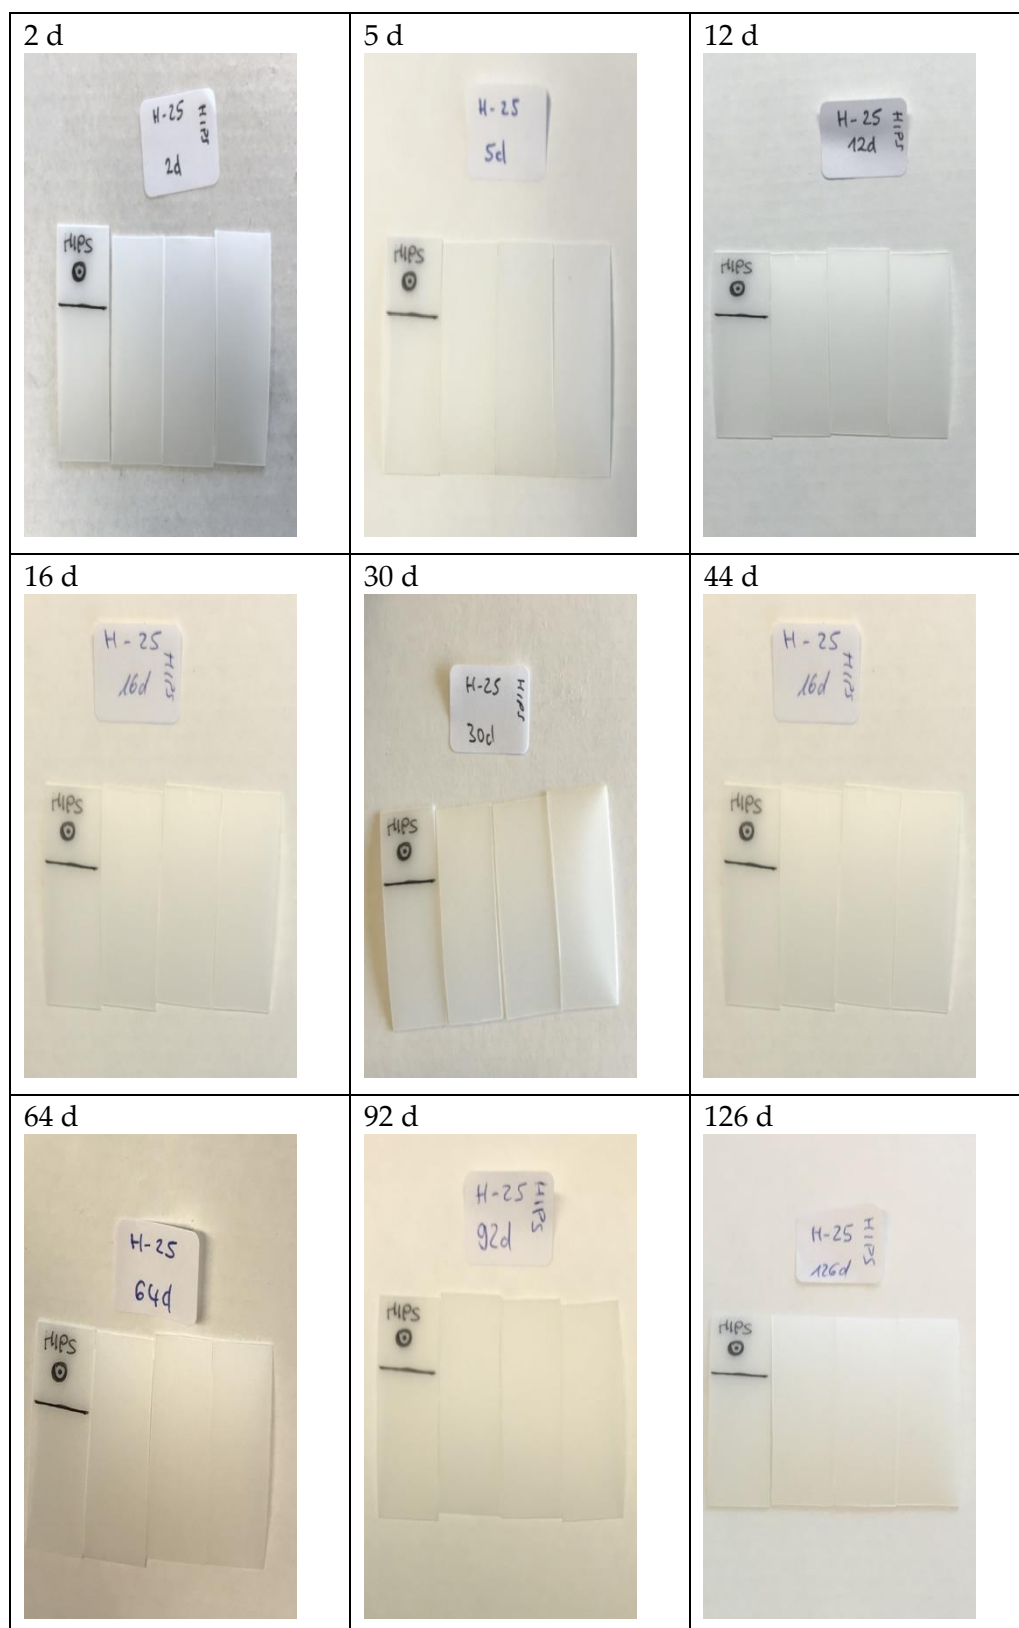

159 d

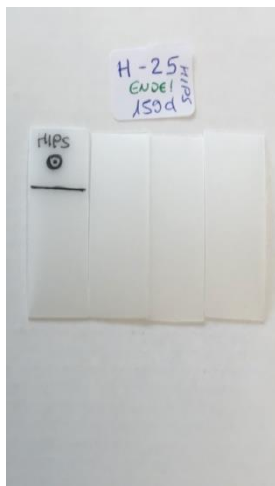

## 12 Contact with 10% Ethanol

### 12.1 10% Ethanol at 60 °C

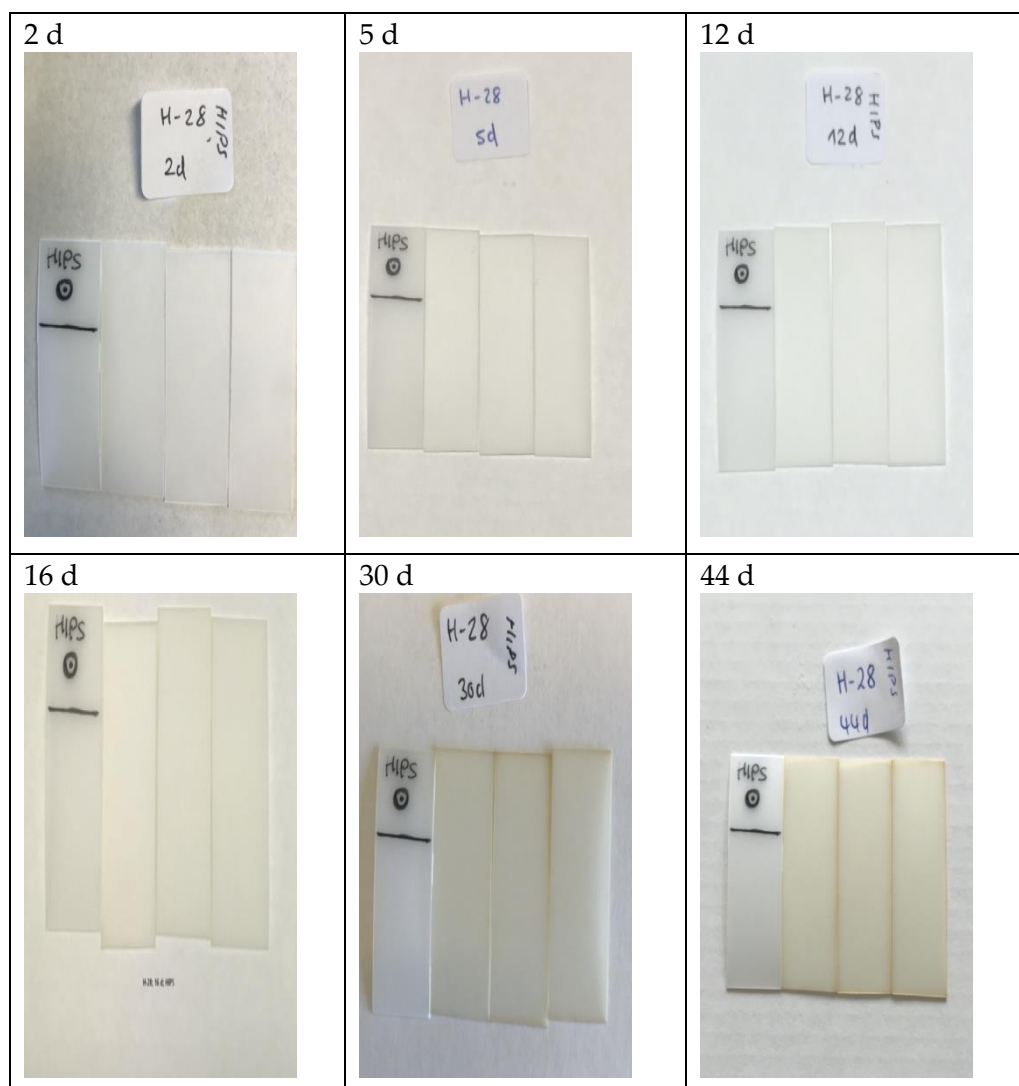



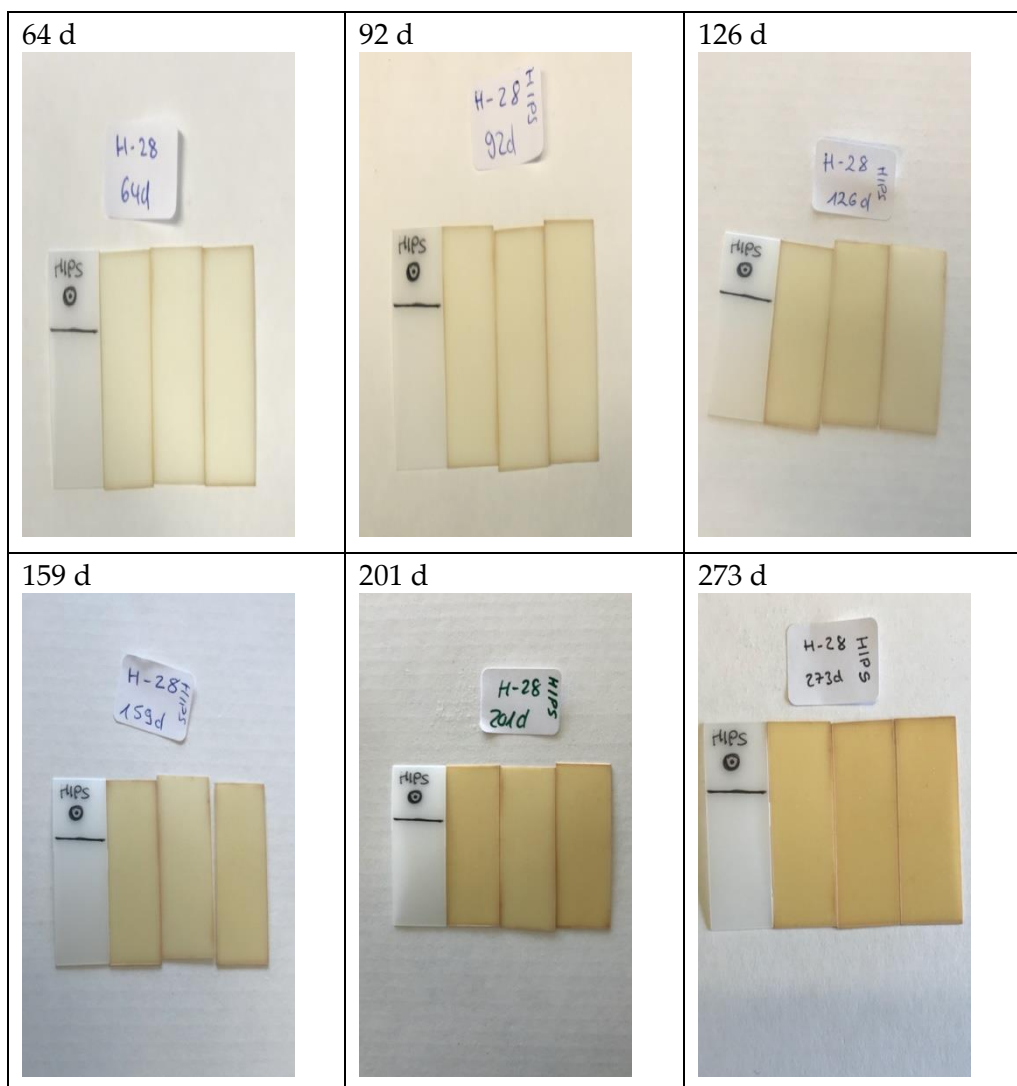

## 12.2 10% Ethanol at 40 °C

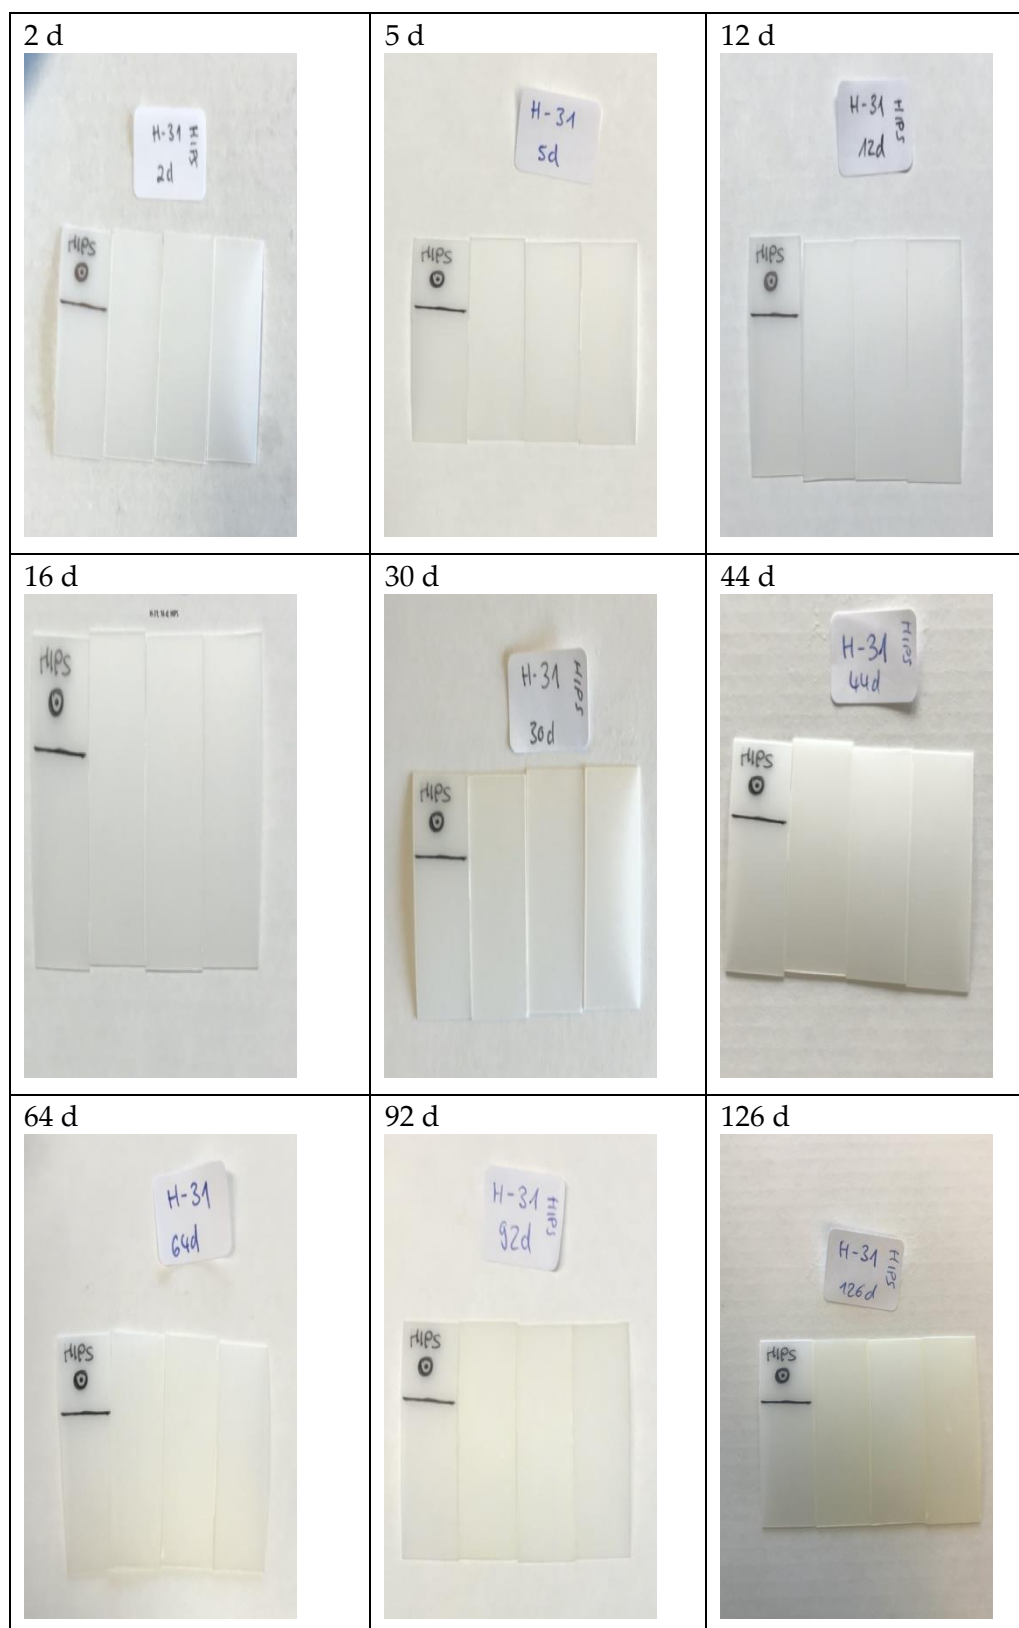

|                                                                                                |  |  |
|------------------------------------------------------------------------------------------------|--|--|
| <p>159 d</p>  |  |  |
|------------------------------------------------------------------------------------------------|--|--|

### 12.3 10% Ethanol at 20 °C

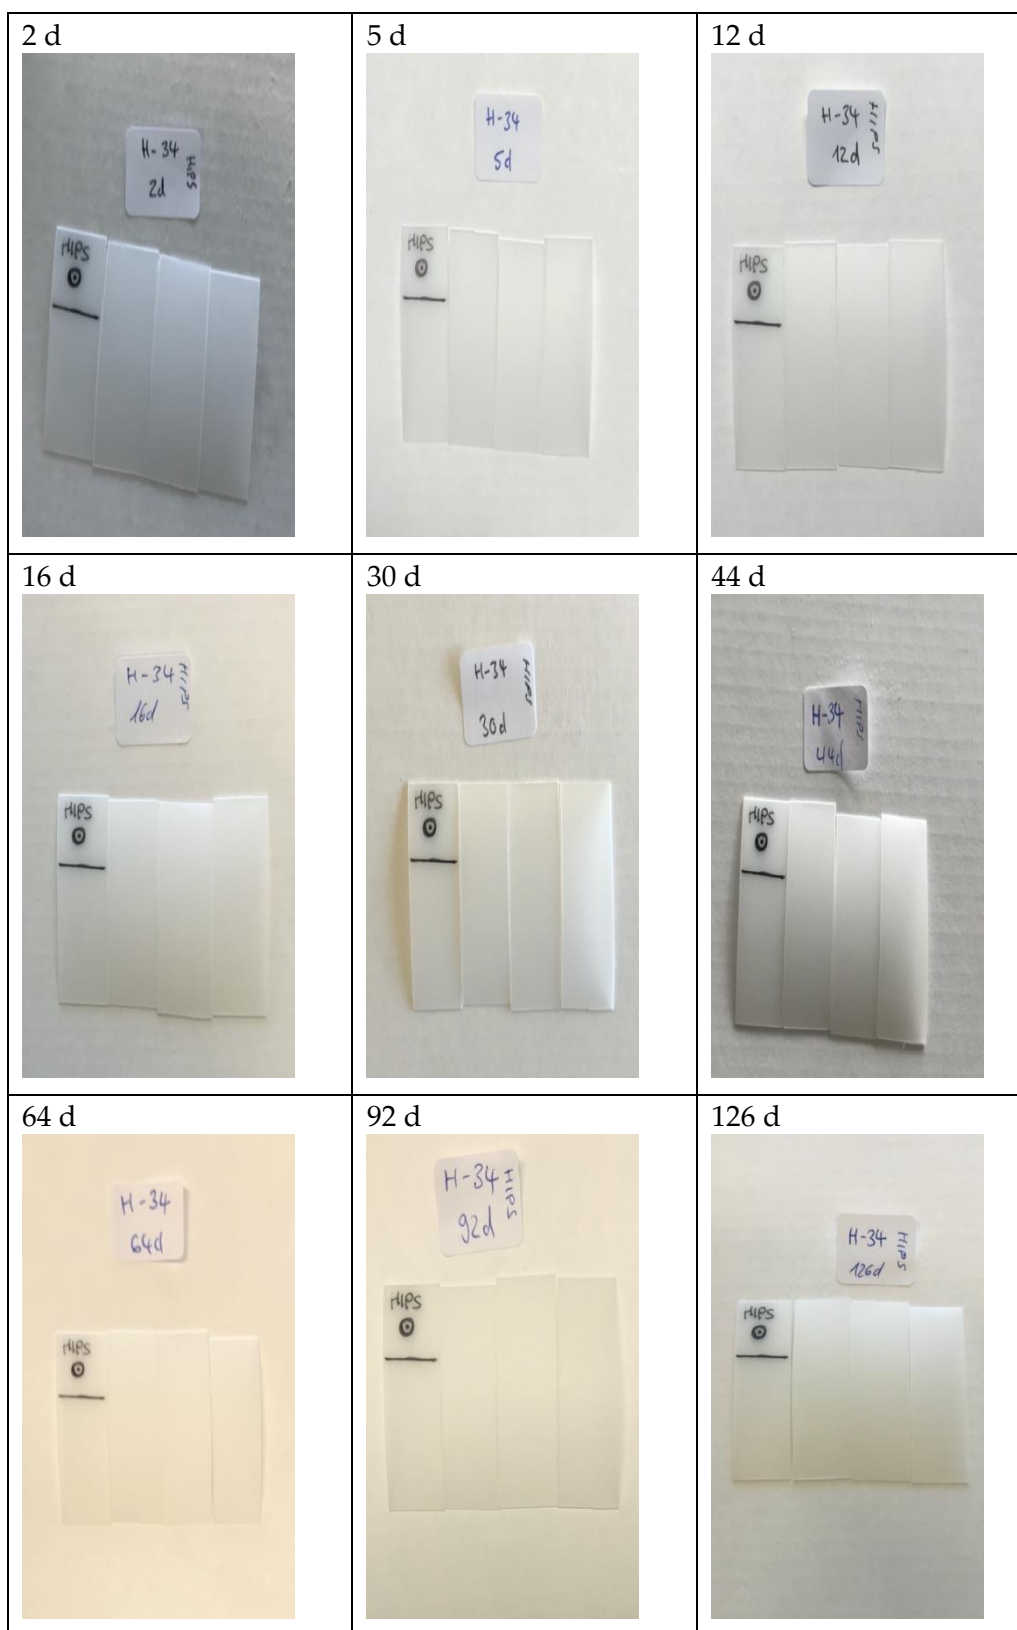

159 d

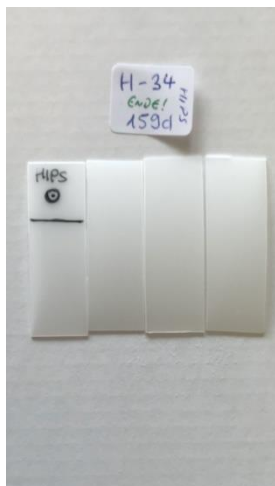



## 13 Contact with 3% acetic acid

### 13.1 3% Acetic acid at 60 °C

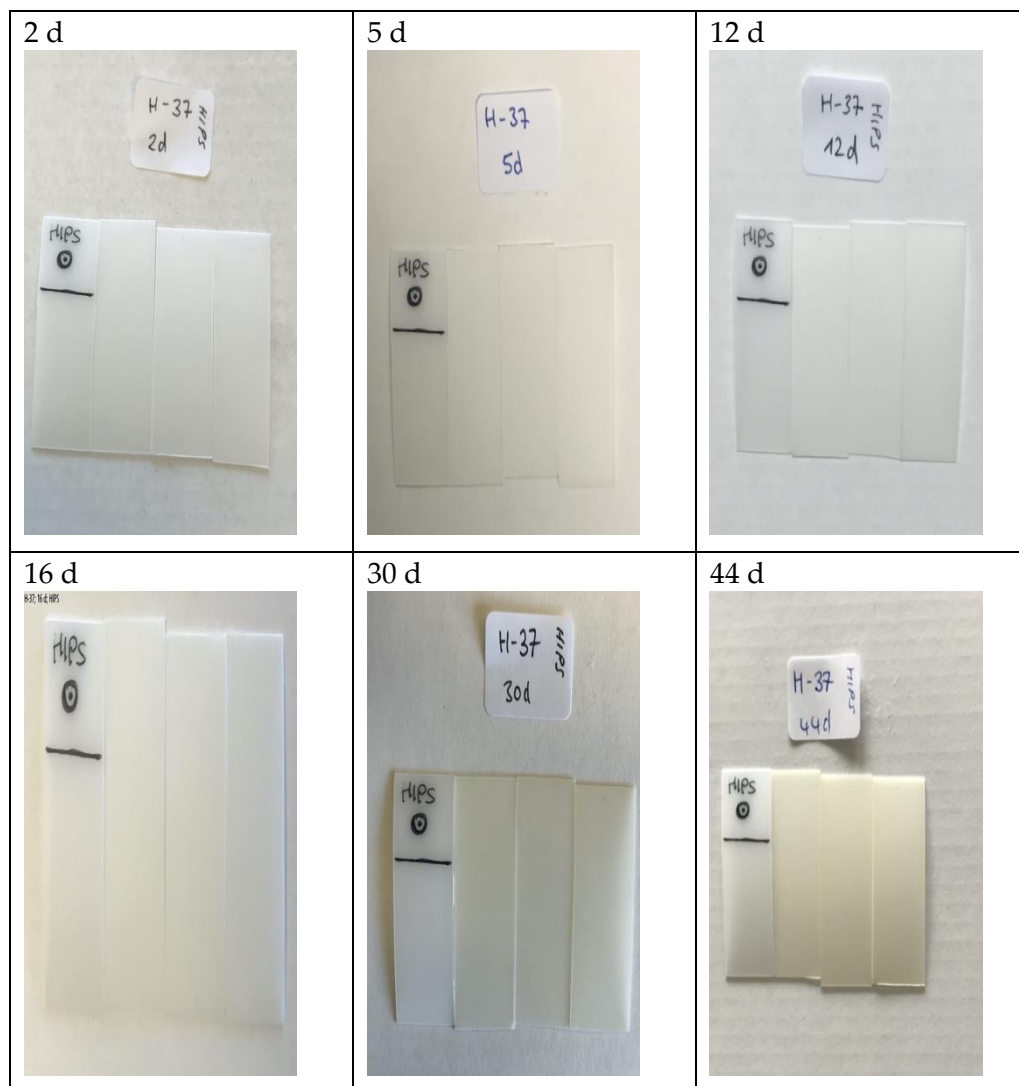

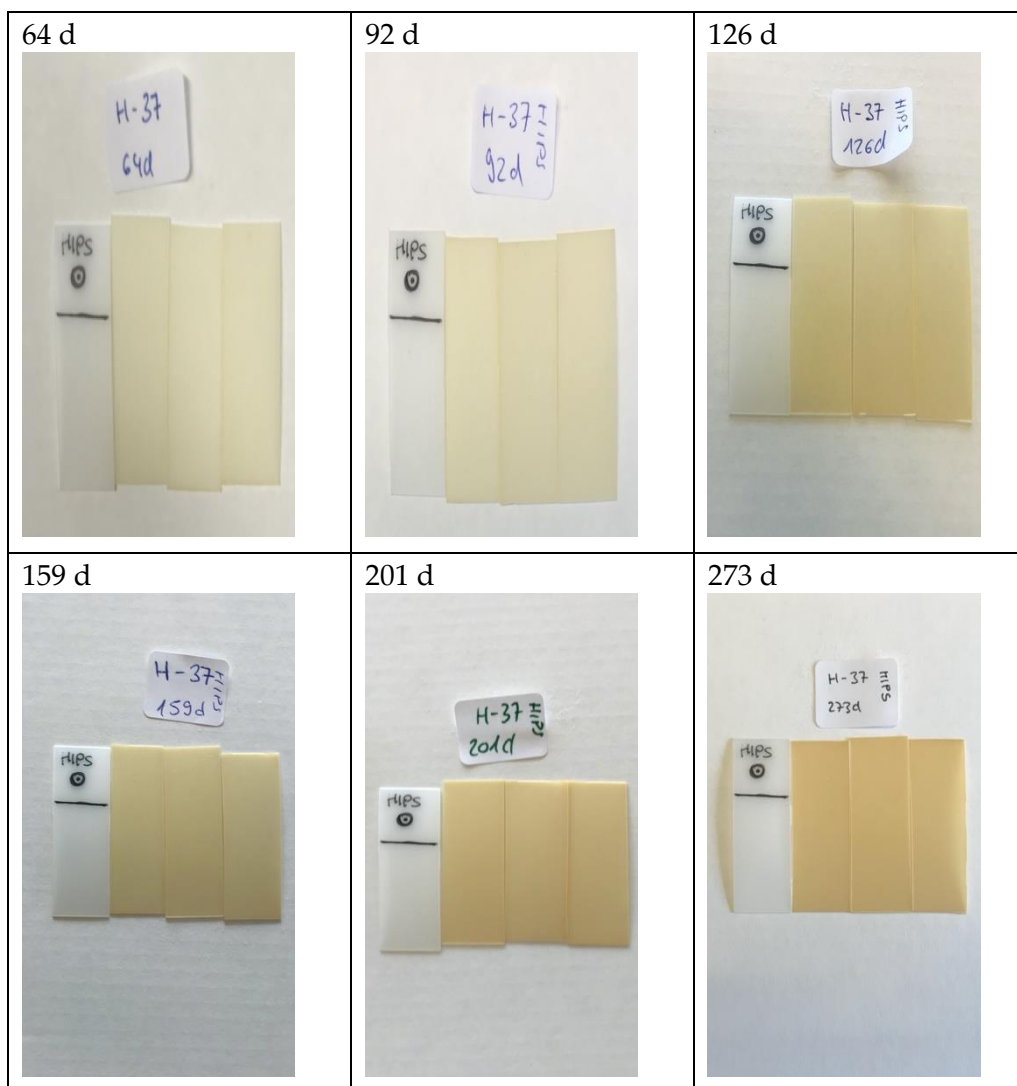

### 13.2 3% Acetic acid at 40 °C

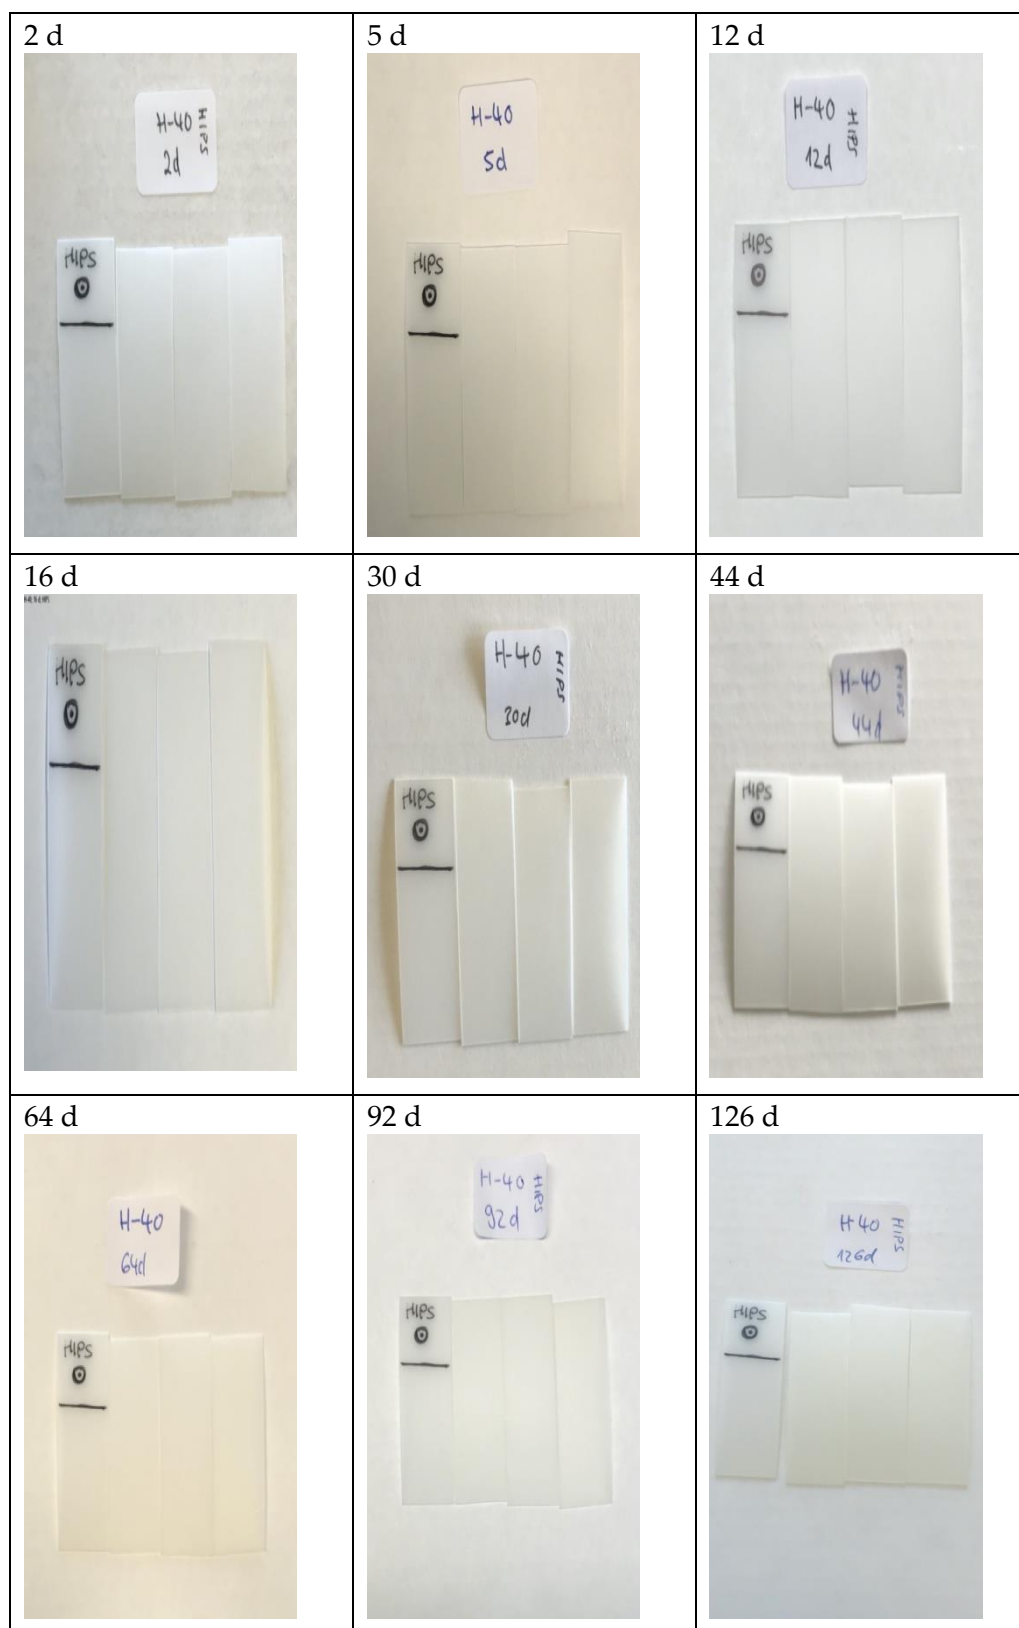

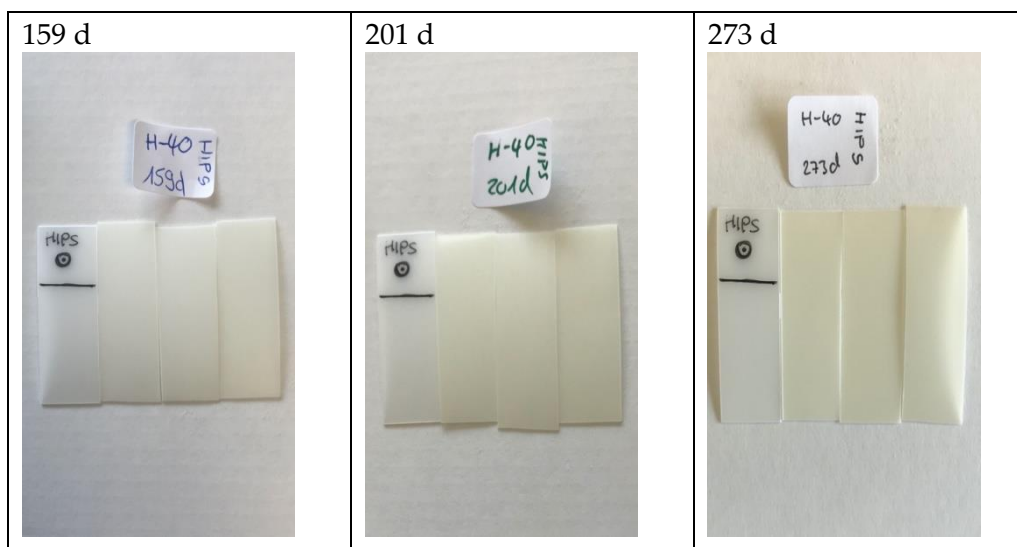

### 13.3 3% Acetic acid at 20 °C

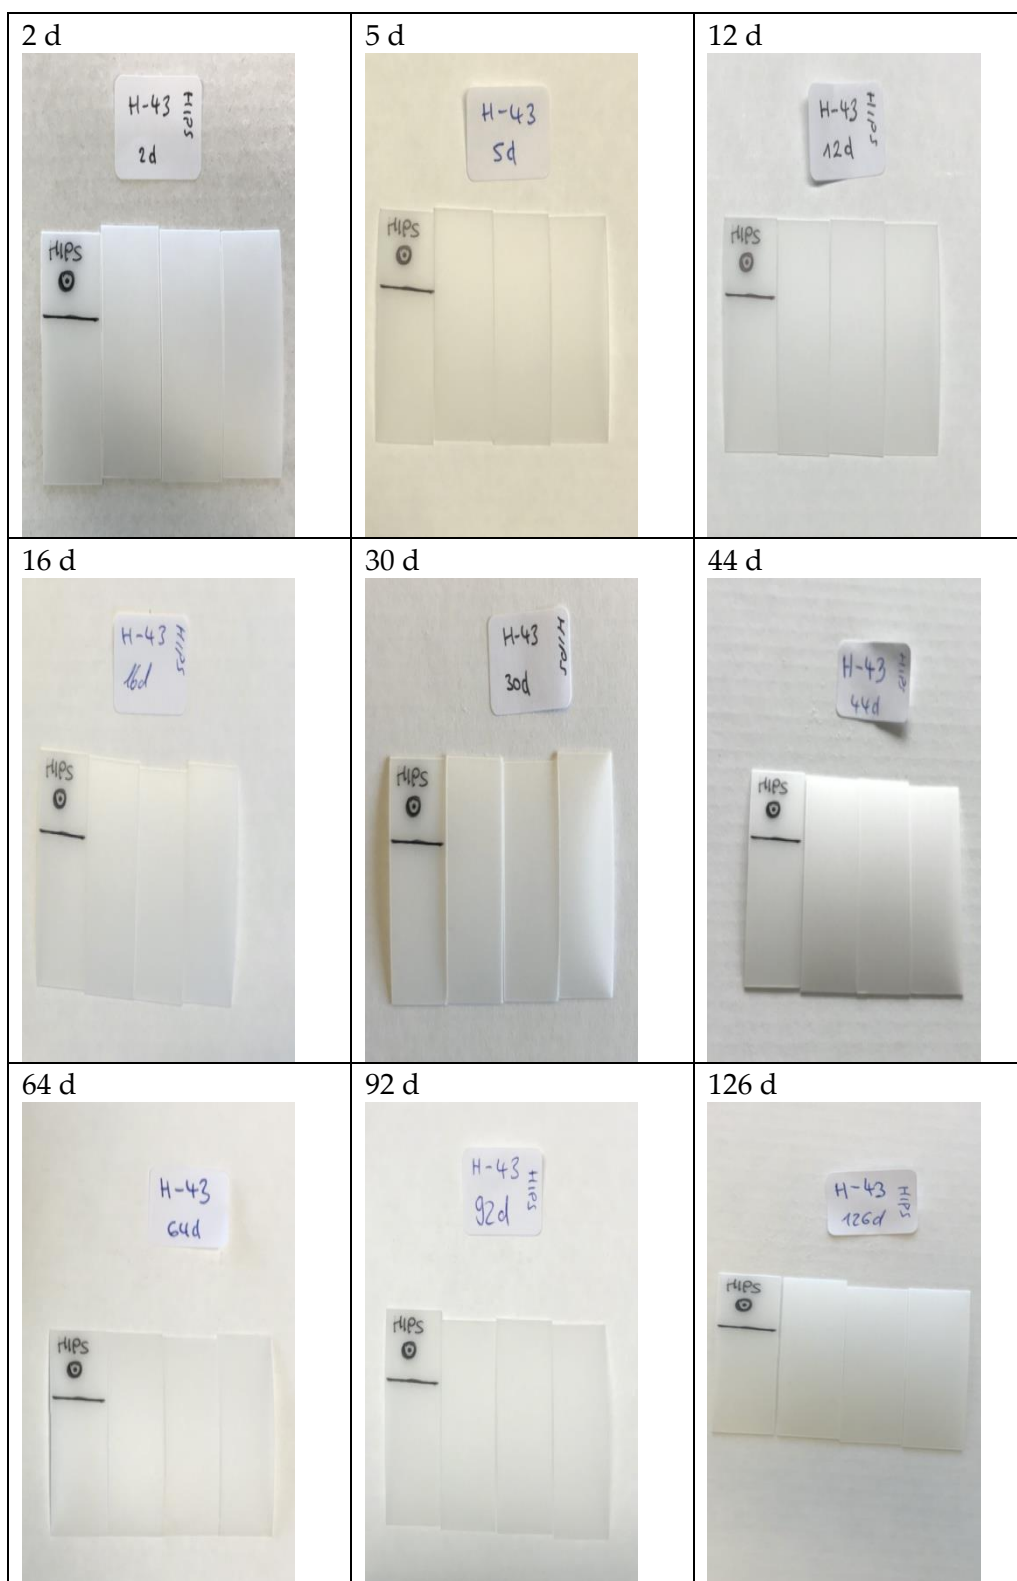

|                                                                                   |  |  |
|-----------------------------------------------------------------------------------|--|--|
| 159 d                                                                             |  |  |
|  |  |  |



## 14 Contact with real foods

### 14.1 Milk, cream and olive oil 60 d at 20 °C

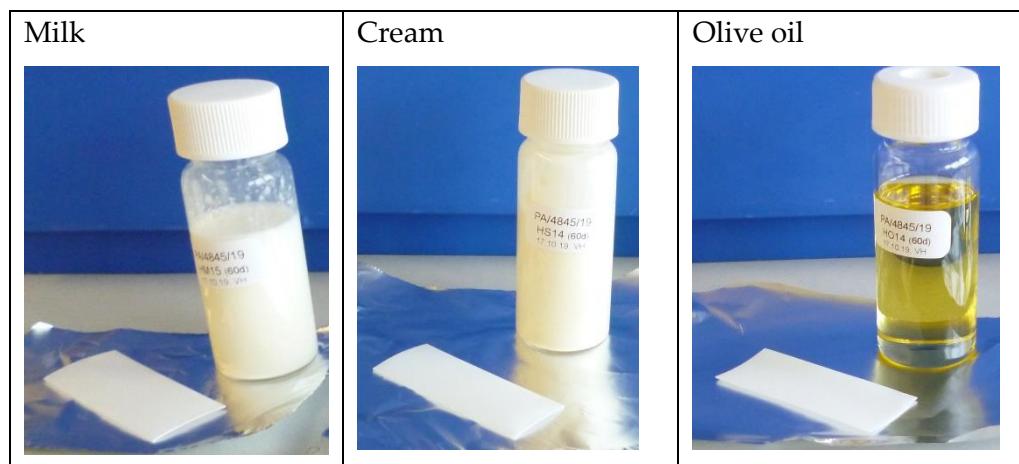

### 14.2 Milk, cream and olive oil 10 d at 40 °C

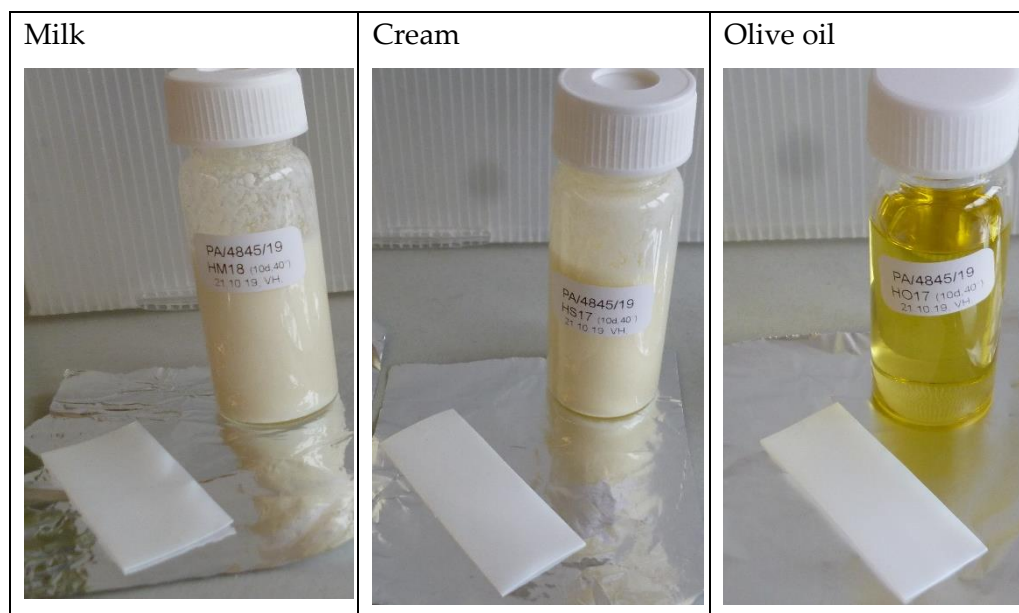

### 14.3 Lard at 5 °C

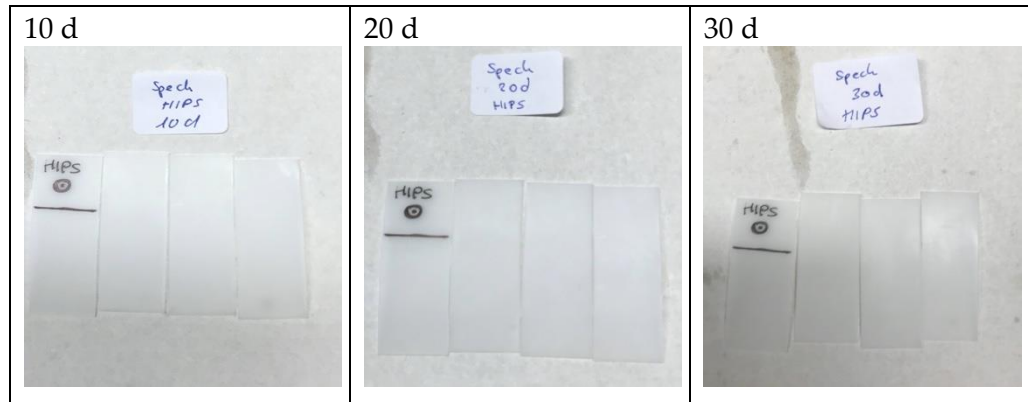

### 14.4 Butter at 5 °C

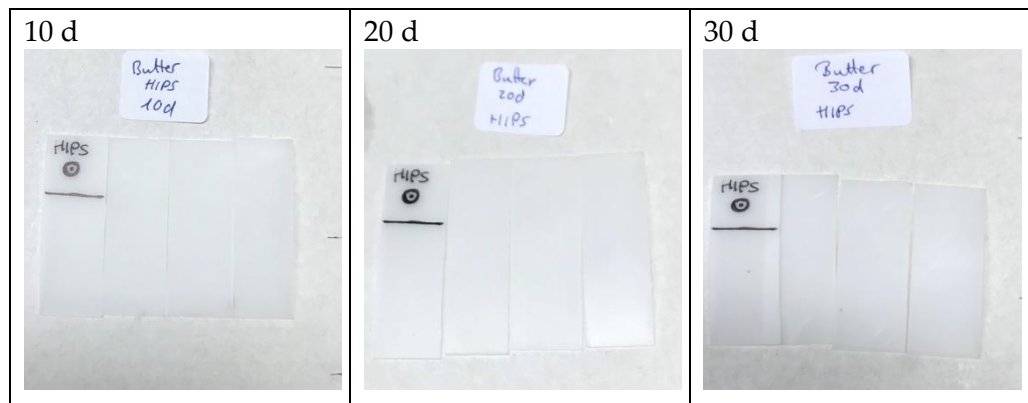

### 14.5 Fish oil at 20 °C

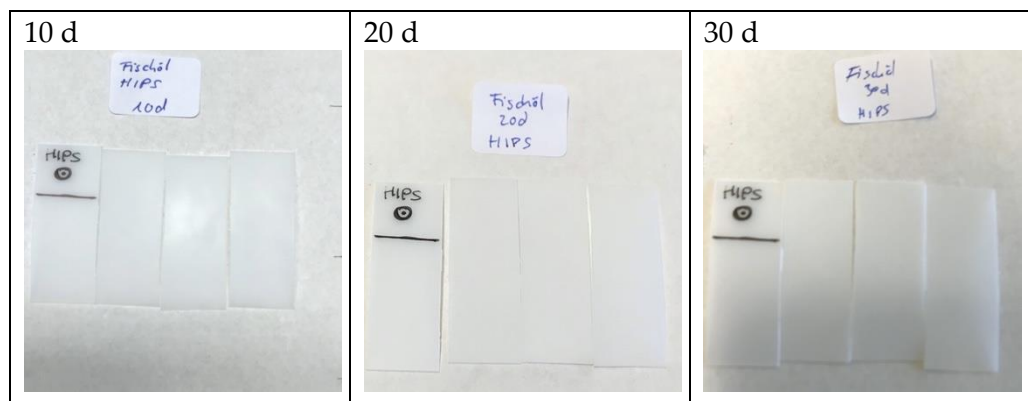

#### 14.6 Miglyol® 812 at 20°C

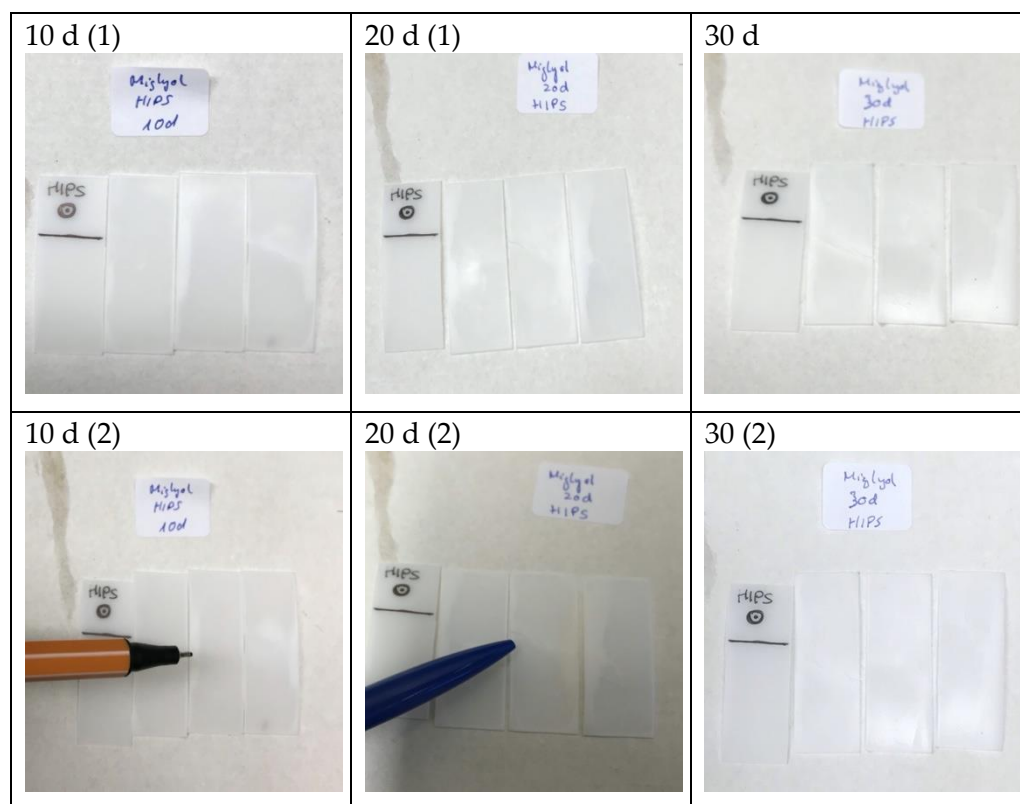

Note: for Miglyol, photos for two replicates (1) and (2) are reported

#### 14.7 Clear orange juice at 20 °C

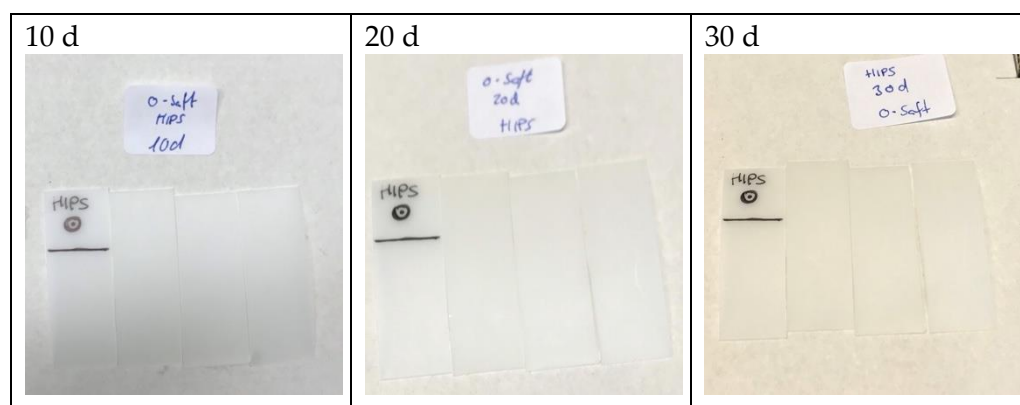

#### 14.8 Ground coffee beans at 20 °C

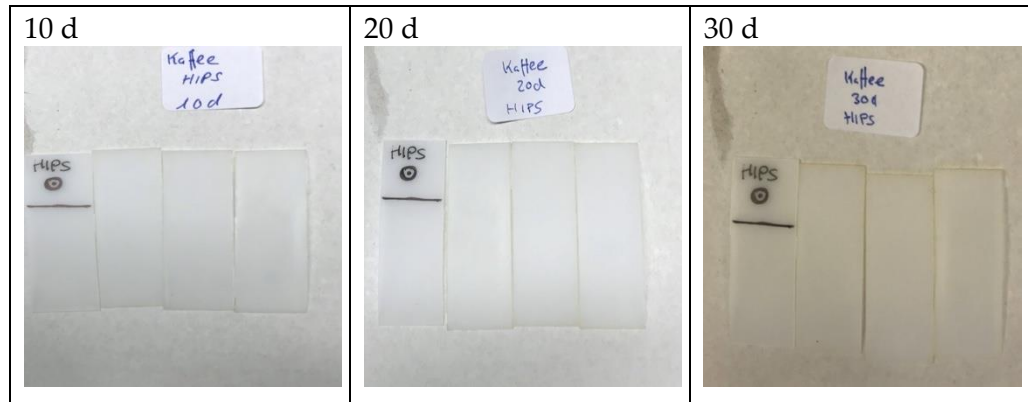

#### 14.9 Noodles at 20 °C

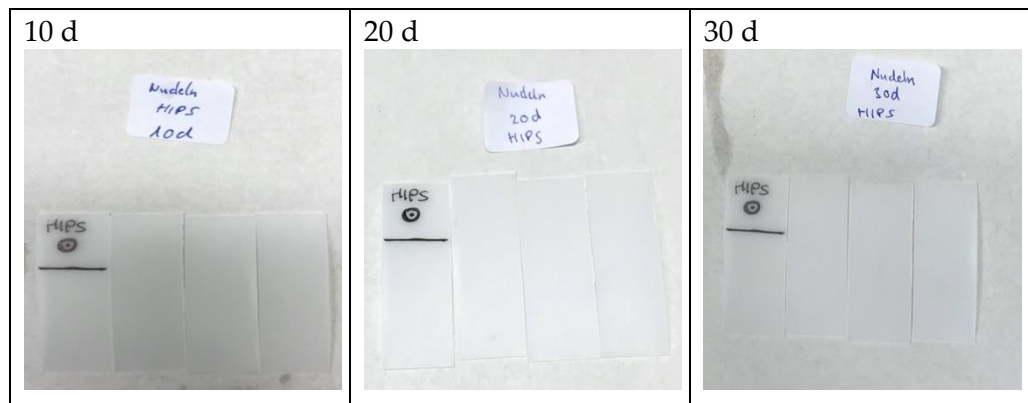

#### 14.10 Oat flakes at 20 °C

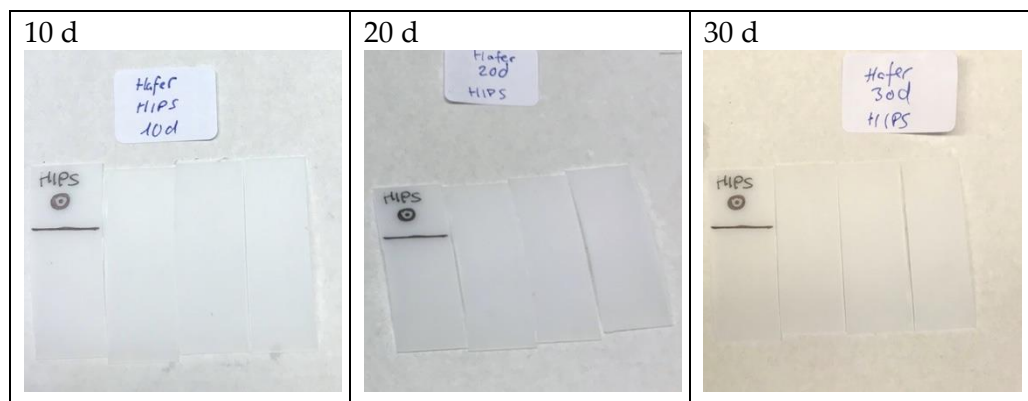

### 14.11 Wheat loops at 20 °C

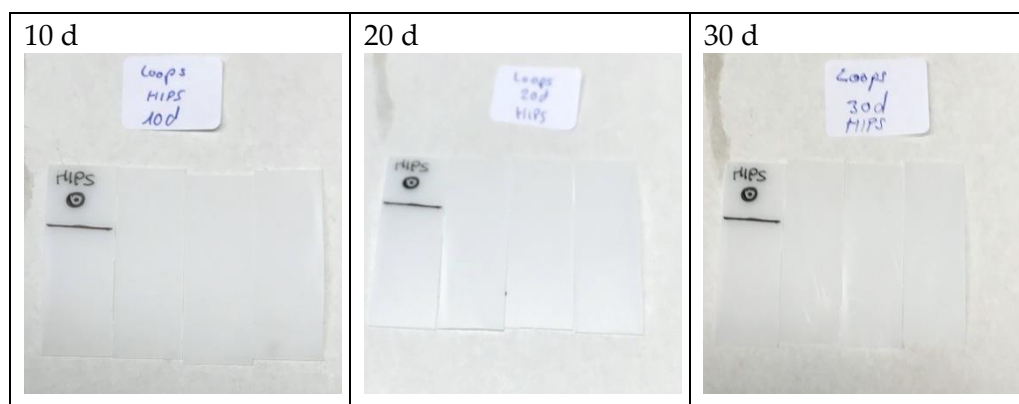

### 14.12 Water at 20 °C

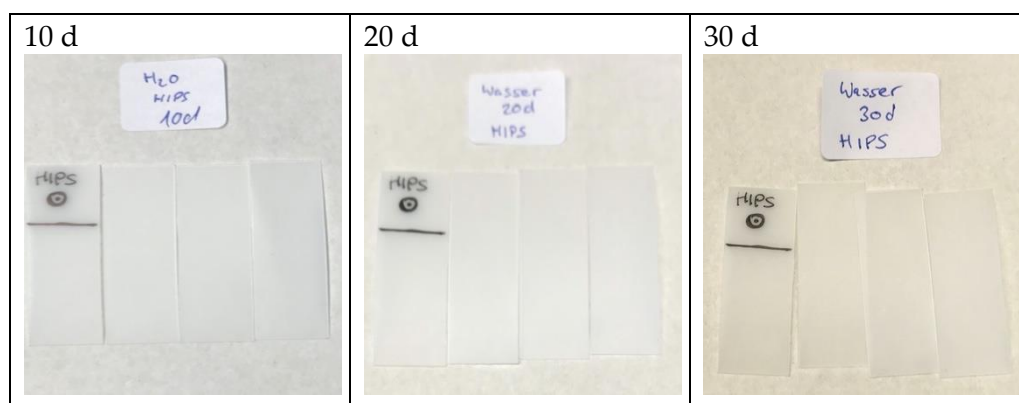

### 14.13 Water at 40 °C

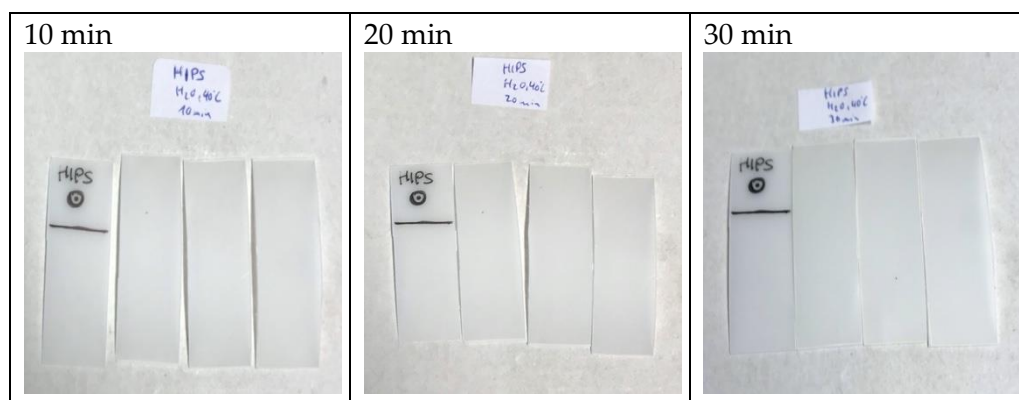

#### 14.14 Water at 60 °C

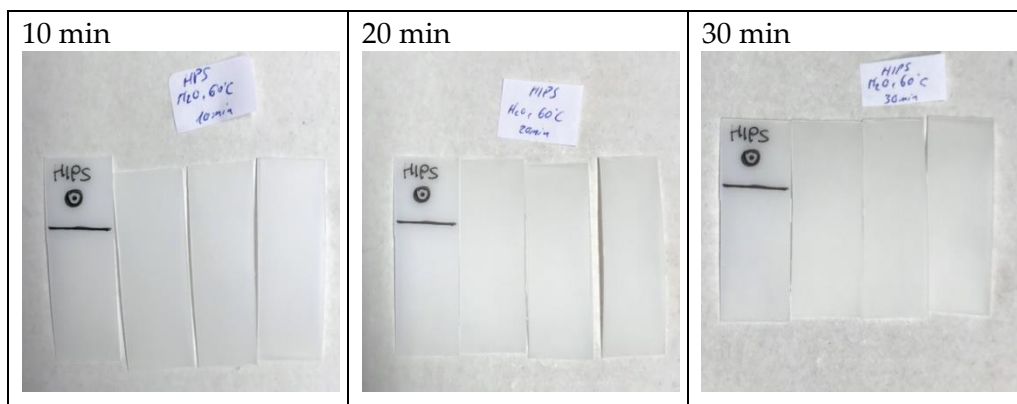

#### 14.15 Water at 80 °C

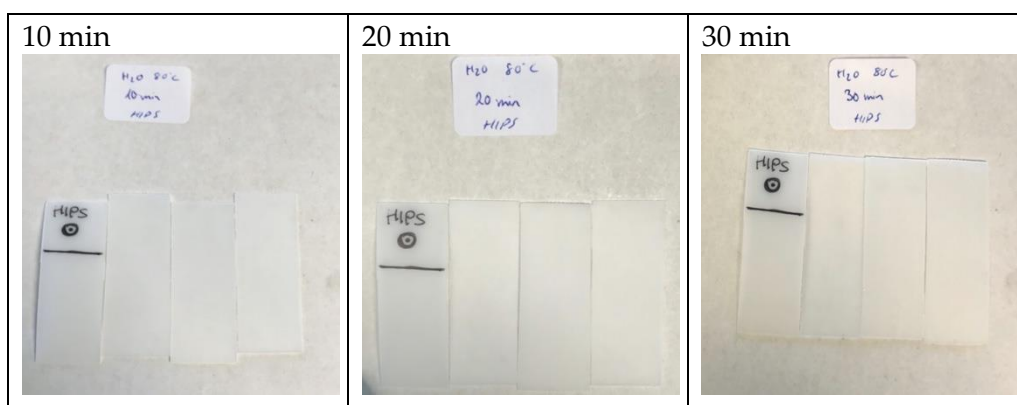

#### 14.16 Water at 100 °C

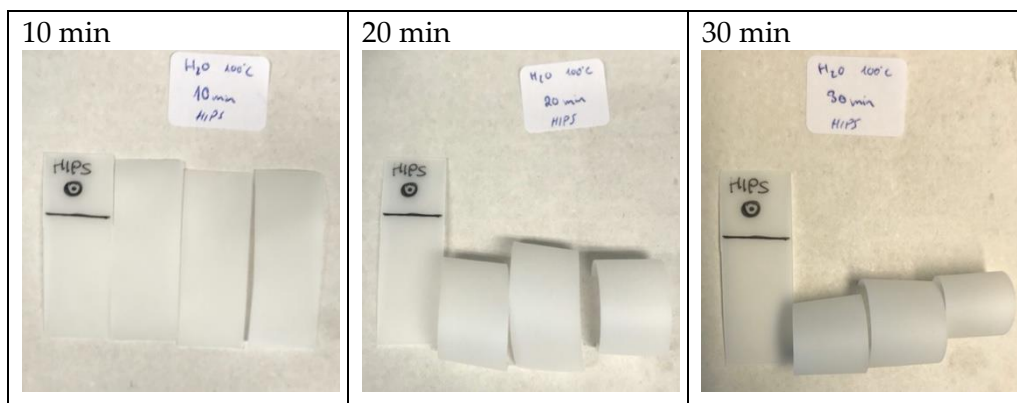



#### 14.17 Brewed coffee at 80 °C

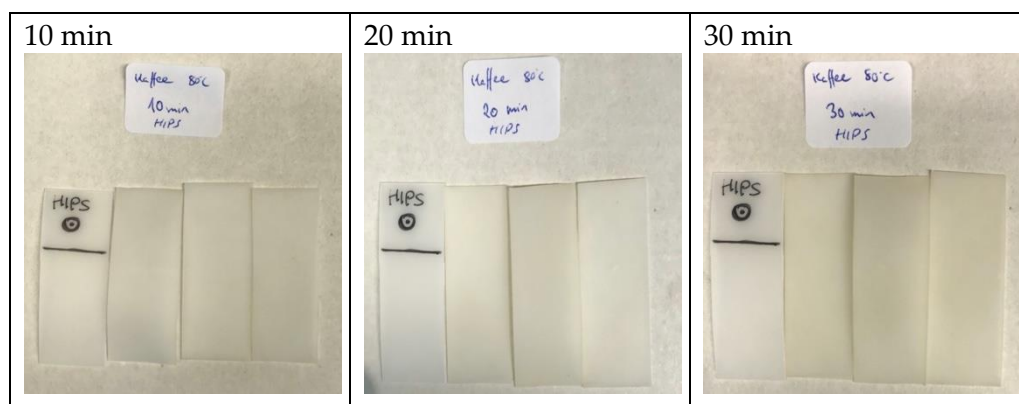

#### 14.18 Brewed coffee at 100 °C ( $T_{\text{gradient}}$ )

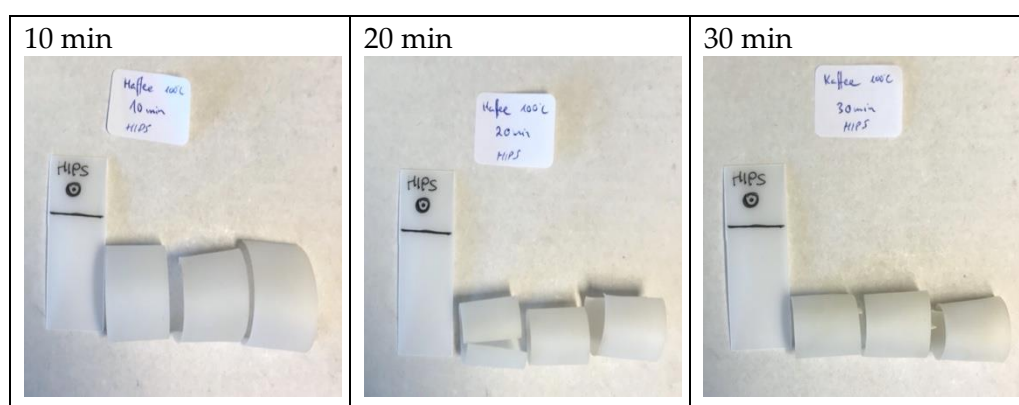

#### 14.19 Brewed coffee at 100 °C ( $T_{\text{constant}}$ )

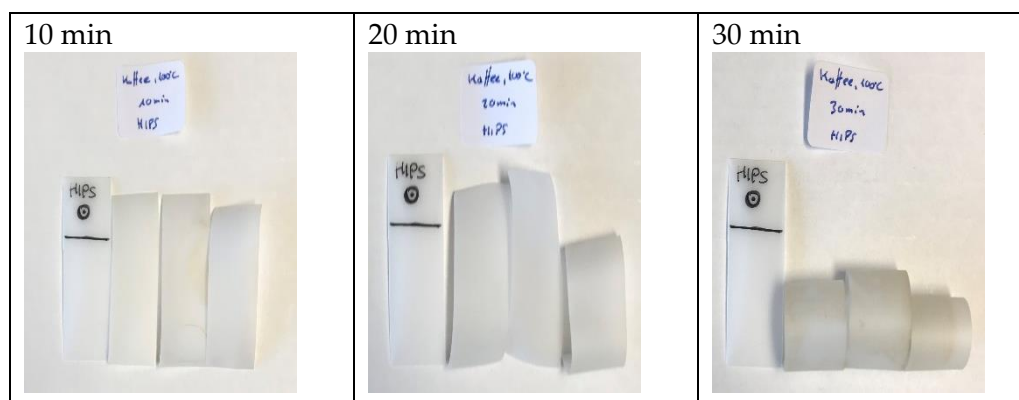

Supplement: s1 [file s1]
