# Supplementary material for: Migration Testing of GPPS and HIPS Polymers: Swelling Effect Caused by Food Simulants Compared to Real Foods
Source: MDPI journal article supplement (doi:10.3390/molecules27030823), 2022-01-26
Supplement: s1 [file s1]

*Article*

# **Migration testing of GPPS and HIPS polymers: swelling effect caused by food simulants compared to real foods**

**Valeria Guazzotti \*, Anita Gruner, Mladen Juric, Veronika Hendrich, Angela Störmer and Frank Welle**

Fraunhofer Institute for Process Engineering and Packaging, IVV, Giggenhauser Straße 35, 85354 Freising, Germany

\*correspondence: [valeria.guazzotti@ivv.fraunhofer.de](mailto:valeria.guazzotti@ivv.fraunhofer.de)

## **Supplementary material -1 (Tabulated data)**

## Index

|    |                                                             |    |
|----|-------------------------------------------------------------|----|
| ⊙  | GPPS.....                                                   | 3  |
| 1  | Migration and weight increase in isooctane at 60 °C .....   | 3  |
| 2  | Migration and weight increase in isooctane at 40 °C .....   | 7  |
| 3  | Migration in isooctane at 20 °C.....                        | 11 |
| 4  | Migration and weight increase in 95% ethanol at 60 °C ..... | 13 |
| 5  | Migration and weight increase in 95% ethanol at 40 °C ..... | 17 |
| 6  | Migration and weight increase in 95% ethanol at 20 °C ..... | 20 |
| 7  | Migration and weight increase in 50% ethanol at 60 °C ..... | 23 |
| 8  | Migration and weight increase in 50% ethanol at 40 °C ..... | 26 |
| 9  | Weight increase in 50% ethanol at 20 °C.....                | 28 |
| 10 | Weight increase in 20% ethanol at 60, 40 and 20 °C .....    | 29 |
| ⊙  | HIPS.....                                                   | 30 |
| 11 | Migration and weight increase in isooctane at 60 °C .....   | 30 |
| 12 | Migration and weight increase in isooctane at 40 °C .....   | 33 |
| 13 | Migration and weight increase in isooctane at 20 °C .....   | 36 |
| 14 | Migration and weight increase in 95% ethanol at 60 °C ..... | 39 |
| 15 | Migration and weight increase in 95% ethanol at 40 °C ..... | 43 |
| 16 | Migration and weight increase in 95% ethanol at 20 °C ..... | 47 |
| 17 | Migration and weight increase in 50% ethanol at 60 °C ..... | 51 |
| 18 | Migration and weight increase in 50% ethanol at 40 °C ..... | 55 |
| 19 | Migration and weight increase in 50% ethanol at 20 °C ..... | 57 |
| 20 | Weight increase in 20% ethanol at 60, 40 and 20 °C .....    | 59 |
| 21 | Weight increase in 10% ethanol at 60, 40 and 20 °C .....    | 60 |
| 22 | Weight increase in 3% acetic acid at 60, 40 and 20 °C ..... | 61 |

❖ GPPS

# 1 Migration and weight increase in isooctane at 60 °C

Migration Kinetics - Results in  $\mu\text{g}/\text{dm}^2$ . Average values and standard deviation (N=3)

| Migration time [days] |         | Toluene | Chloro-benzene | Styrene | Phenyl-cyclo-hexane | Benzo-phenone | Methyl-stearate |
|-----------------------|---------|---------|----------------|---------|---------------------|---------------|-----------------|
| <b>0.02</b>           | average | 6.0     | 7.4            | 13.5    | 14.3                | 27.4          | 27.6            |
|                       | SD      | 2.7     | 4.3            | 2.4     | 2.6                 | 4.3           | 4.6             |
| <b>0.04</b>           | average | 11.40   | 15.23          | 17.29   | 23.60               | 41.67         | 44.5            |
|                       | SD      | 0.32    | 4.87           | 1.25    | 2.87                | 4.64          | 5.2             |
| <b>0.08</b>           | average | 17.79   | 33.96          | 27.26   | 55.52               | 82.56         | 89.5            |
|                       | SD      | 3.37    | 5.43           | 3.65    | 7.67                | 11.83         | 9.3             |
| <b>0.17</b>           | average | 99.15   | 88.08          | 65.00   | 141.69              | 183.54        | 196.5           |
|                       | SD      | 19.94   | 6.86           | 4.07    | 9.26                | 11.44         | 12.4            |
| <b>0.25</b>           | average | 123.33  | 116.63         | 86.38   | 185.61              | 235.97        | 245.1           |
|                       | SD      | 30.65   | 8.02           | 6.79    | 11.91               | 16.51         | 12.0            |
| <b>0.33</b>           | average | 159.67  | 145.77         | 106.83  | 227.28              | 280.17        | 291.8           |
|                       | SD      | 5.78    | 7.37           | 4.45    | 9.53                | 15.02         | 15.7            |
| <b>0.42</b>           | average | 170.66  | 174.02         | 126.49  | 262.31              | 317.66        | 330.0           |
|                       | SD      | 27.08   | 9.91           | 5.50    | 12.86               | 17.42         | 15.8            |
| <b>1</b>              | average | 287.62  | 328.75         | 237.13  | 464.03              | 541.76        | 557.7           |
|                       | SD      | 28.73   | 19.92          | 12.49   | 23.98               | 36.31         | 25.9            |
| <b>2</b>              | average | 481.11  | 549.89         | 382.71  | 728.94              | 822.10        | 840.7           |
|                       | SD      | 28.70   | 26.43          | 17.96   | 36.31               | 42.88         | 31.3            |
| <b>3</b>              | average | 614.09  | 671.81         | 464.73  | 880.10              | 983.10        | 1005.0          |
|                       | SD      | 66.75   | 32.67          | 20.35   | 36.28               | 62.17         | 40.7            |
| <b>6</b>              | average | 811.46  | 944.60         | 651.99  | 1248.38             | 1380.15       | 1407.0          |
|                       | SD      | 55.83   | 52.05          | 35.13   | 87.74               | 132.06        | 87.5            |
| <b>14</b>             | average | 995.95  | 1105.77        | 764.07  | 1434.11             | 1505.88       | 1600.4          |
|                       |         | 73.65   | 50.32          | 36.18   | 94.28               | 98.38         | 116.4           |
| <b>17</b>             | average | 1076.05 | 1109.34        | 767.51  | 1453.79             | 1519.64       | 1623.1          |
|                       | SD      | 28.06   | 30.19          | 20.62   | 69.17               | 67.91         | 91.7            |
| <b>21</b>             | average | 1073.85 | 934.59         | 764.64  | 1449.57             | 1533.01       | 1638.6          |
|                       | SD      | 35.48   | 452.75         | 32.56   | 73.53               | 61.95         | 90.4            |
| <b>28</b>             | average | 1062.02 | 1098.83        | 759.76  | 1463.71             | 1534.59       | 1649.7          |
|                       | SD      | 29.10   | 34.78          | 22.67   | 59.70               | 59.47         | 72.5            |
| <b>35</b>             | average | 1063.49 | 1097.74        | 759.12  | 1457.08             | 1528.58       | 1655.9          |
|                       | SD      | 35.66   | 44.09          | 28.82   | 62.14               | 46.23         | 60.5            |
| <b>42</b>             | SD      | 1062.86 | 1105.37        | 765.07  | 1479.35             | 1537.12       | 1674.2          |
|                       |         | 43.08   | 52.43          | 35.48   | 67.31               | 64.48         | 77.9            |

Relative migration - Results in %. Average values

| Migration<br>time<br>[days] | Toluene | Chloro-<br>benzene | Styrene | Phenyl-<br>cyclo-<br>hexane | Benzo-<br>phenone | Methyl-<br>stearate |
|-----------------------------|---------|--------------------|---------|-----------------------------|-------------------|---------------------|
| 0.02                        | 0.7     | 0.7                | 1.9     | 1.0                         | 2.2               | 1.9                 |
| 0.04                        | 1.3     | 1.5                | 2.4     | 1.6                         | 3.3               | 3.0                 |
| 0.08                        | 2.1     | 3.3                | 3.8     | 3.8                         | 6.6               | 6.1                 |
| 0.17                        | 11.6    | 8.5                | 9.0     | 9.8                         | 14.7              | 13.3                |
| 0.25                        | 14.4    | 11.3               | 12.0    | 12.8                        | 18.9              | 16.6                |
| 0.33                        | 18.7    | 14.1               | 14.8    | 15.7                        | 22.4              | 19.8                |
| 0.42                        | 20.0    | 16.8               | 17.5    | 18.1                        | 25.4              | 22.4                |
| 1                           | 33.6    | 31.8               | 32.9    | 32.1                        | 43.3              | 37.9                |
| 2                           | 56.3    | 53.2               | 53.0    | 50.4                        | 65.7              | 57.1                |
| 3                           | 71.8    | 65.0               | 64.4    | 60.9                        | 78.6              | 68.3                |
| 6                           | 94.9    | 91.4               | 90.4    | 86.4                        | 110.4             | 95.6                |
| 14                          | 116.5   | 107.0              | 105.9   | 99.2                        | 120.4             | 108.7               |
| 17                          | 125.9   | 107.4              | 106.4   | 100.6                       | 121.5             | 110.3               |
| 21                          | 125.6   | 104.0              | 106.0   | 100.3                       | 122.6             | 111.3               |
| 28                          | 124.2   | 106.4              | 105.3   | 101.3                       | 122.7             | 112.1               |
| 35                          | 124.4   | 106.2              | 105.2   | 100.8                       | 122.2             | 112.5               |
| 42                          | 124.3   | 107.0              | 106.0   | 102.4                       | 122.9             | 113.7               |

## Migration Kinetics - Results in $\mu\text{g}/\text{dm}^2$ . Average values

| Migration time [days] | Oligo-1 | Oligo-2 | Oligo-3 | Oligo-4 | Oligo-5 | Oligo-6 | Oligo-7 | Oligo-8 |
|-----------------------|---------|---------|---------|---------|---------|---------|---------|---------|
| 0.02                  | 06.2    | 24.9    | 61.8    | 73.5    | 166.0   | 59.5    | 18.9    | 07.4    |
| 0.04                  | 10.7    | 43.2    | 107.1   | 125.9   | 289.2   | 93.4    | 31.1    | 11.4    |
| 0.08                  | 24.9    | 95.5    | 216.7   | 249.9   | 565.1   | 174.0   | 62.8    | 21.6    |
| 0.17                  | 56.9    | 211.7   | 409.1   | 462.6   | 1056.8  | 314.9   | 120.4   | 36.7    |
| 0.25                  | 69.7    | 260.4   | 487.1   | 540.5   | 1231.4  | 367.4   | 142.4   | 44.5    |
| 0.33                  | 83.3    | 309.2   | 560.7   | 618.8   | 1412.0  | 421.2   | 162.9   | 50.6    |
| 0.42                  | 94.2    | 349.0   | 622.5   | 682.7   | 1559.9  | 465.0   | 180.8   | 56.7    |
| 1                     | 157.2   | 576.9   | 956.7   | 1038.1  | 2386.9  | 705.6   | 278.4   | 88.8    |
| 2                     | 247.4   | 897.8   | 1406.9  | 1516.2  | 3502.9  | 1024.8  | 414.3   | 134.1   |
| 3                     | 301.6   | 1093.8  | 1706.6  | 1842.6  | 4240.1  | 1250.2  | 474.2   | 158.1   |
| 6                     | 388.0   | 1403.5  | 2147.5  | 2319.4  | 5326.9  | 1562.8  | 628.3   | 203.6   |
| 14                    | 483.1   | 1769.1  | 2928.0  | 3220.0  | 7345.9  | 2144.9  | 858.0   | 281.2   |
| 17                    | 512.8   | 1887.2  | 3227.8  | 3585.8  | 8111.5  | 2360.2  | 944.6   | 299.7   |
| 21                    | 519.8   | 1893.7  | 3341.7  | 3736.9  | 8386.5  | 2431.8  | 974.5   | 308.7   |
| 28                    | 503.7   | 1849.0  | 3267.8  | 3724.7  | 8272.2  | 2388.3  | 940.5   | 301.1   |
| 35                    | 499.1   | 1836.7  | 3329.7  | 3819.2  | 8439.3  | 2433.0  | 950.7   | 301.4   |
| 42                    | 498.4   | 1840.8  | 3342.7  | 3853.3  | 8490.3  | 2444.6  | 958.5   | 303.2   |

## Relative migration - Results in %. Average values

| Migration time [days] | Oligo-1 | Oligo-2 | Oligo-3 | Oligo-4 | Oligo-5 | Oligo-6 | Oligo-7 | Oligo-8 |
|-----------------------|---------|---------|---------|---------|---------|---------|---------|---------|
| 0.02                  | 1.7     | 2.2     | 2.2     | 3.3     | 3.5     | 4.4     | 3.6     | 4.3     |
| 0.04                  | 2.9     | 3.8     | 3.8     | 5.6     | 6.1     | 6.9     | 5.8     | 6.5     |
| 0.08                  | 6.7     | 8.5     | 7.6     | 11.2    | 11.9    | 12.9    | 11.8    | 12.4    |
| 0.17                  | 15.4    | 18.8    | 14.4    | 20.7    | 22.2    | 23.4    | 22.6    | 21.1    |
| 0.25                  | 18.9    | 23.1    | 17.1    | 24.1    | 25.8    | 27.3    | 26.7    | 25.5    |
| 0.33                  | 22.6    | 27.4    | 19.7    | 27.6    | 29.6    | 31.3    | 30.6    | 29.0    |
| 0.42                  | 25.5    | 30.9    | 21.9    | 30.5    | 32.7    | 34.5    | 33.9    | 32.5    |
| 1                     | 42.6    | 51.2    | 33.6    | 46.4    | 50.1    | 52.4    | 52.2    | 50.9    |
| 2                     | 67.0    | 79.6    | 49.4    | 67.7    | 73.5    | 76.1    | 77.7    | 76.9    |
| 3                     | 81.7    | 97.0    | 59.9    | 82.3    | 89.0    | 92.8    | 89.0    | 90.7    |
| 6                     | 105.1   | 124.5   | 75.4    | 103.6   | 111.8   | 116.0   | 117.9   | 116.8   |
| 14                    | 130.9   | 156.9   | 102.8   | 143.8   | 154.2   | 159.3   | 161.0   | 161.4   |
| 17                    | 139.0   | 167.4   | 113.4   | 160.2   | 170.3   | 175.2   | 177.2   | 172.0   |
| 21                    | 140.9   | 168.0   | 117.4   | 166.9   | 176.0   | 180.6   | 182.8   | 177.2   |
| 28                    | 136.5   | 164.0   | 114.8   | 166.4   | 173.6   | 177.3   | 176.5   | 172.8   |
| 35                    | 135.3   | 162.9   | 116.9   | 170.6   | 177.1   | 180.6   | 178.4   | 173.0   |
| 42                    | 135.1   | 163.3   | 117.4   | 172.1   | 178.2   | 181.5   | 179.8   | 174.0   |

Weight increase - Results in %. Average values and standard deviation (N=3)

| Time contact<br>[days] | Weight increase<br>[%] | SD   |
|------------------------|------------------------|------|
| 0.02                   | 0.0                    | 0.01 |
| 0.04                   | 0.0                    | 0.01 |
| 0.08                   | 0.3                    | 0.01 |
| 0.13                   | 0.6                    | 0.01 |
| 0.17                   | 0.9                    | 0.13 |
| 0.25                   | 2.7                    | 0.12 |
| 0.33                   | 3.9                    | 0.07 |
| 1                      | 11.8                   | 0.15 |
| 2                      | 17.1                   | 0.08 |
| 3                      | 21.0                   | 0.12 |
| 6                      | 30.4                   | 0.17 |
| 8                      | 35.0                   | 0.07 |
| 10                     | 45.0                   | 0.14 |
| 15                     | 49.9                   | 0.83 |
| 23                     | 57.0                   | 0.73 |
| 29                     | 63.9                   | 0.04 |
| 45                     | 71.8                   | 0.45 |
| 65                     | 80.3                   | 0.48 |
| 73                     | 87.0                   | 0.17 |
| 99                     | 88.1                   | 3.43 |
| 114                    | 92.5                   | 3.57 |
| 143                    | 95.5                   | 0.36 |
| 192                    | 96.4                   | 2.05 |

## 2 Migration and weight increase in isooctane at 40 °C

Migration Kinetics - Results in  $\mu\text{g}/\text{dm}^2$ . Average values and standard deviation (N=3)

| Migration<br>time<br>[days] |         | Toluene | Chloro-<br>benzene | Styrene | Phenyl-<br>cyclo-<br>hexane | Benzo-<br>phenone | Methyl-<br>stearate |
|-----------------------------|---------|---------|--------------------|---------|-----------------------------|-------------------|---------------------|
| 0.25                        | average |         | 4.3                | 3.7     | 1.5                         | 3.2               | 6.7                 |
|                             | SD      |         | 5.8                | 1.3     | 0.3                         | 1.6               | 1.9                 |
| 0.5                         | average |         | 6.6                | 4.2     | 2.1                         | 3.3               | 6.3                 |
|                             | SD      |         | 7.9                | 2.7     | 0.4                         | 0.5               | 0.3                 |
| 1                           | average |         | 16.2               | 8.3     | 4.4                         | 6.7               | 8.1                 |
|                             | SD      |         | 2.7                | 1.3     | 0.8                         | 1.2               | 0.7                 |
| 2                           | average |         | 25.1               | 11.9    | 8.1                         | 15.9              | 13.2                |
|                             | SD      |         | 4.5                | 2.0     | 0.7                         | 9.6               | 1.8                 |
| 6                           | average |         | 40.3               | 17.5    | 13.8                        | 20.3              | 21.3                |
|                             | SD      |         | 5.5                | 2.4     | 2.0                         | 1.6               | 2.3                 |
| 14                          | average |         | 60.2               | 24.4    | 20.4                        | 30.2              | 32.3                |
|                             | SD      |         | 7.5                | 3.2     | 2.4                         | 2.7               | 3.1                 |
| 17                          | average |         | 66.9               | 29.2    | 22.4                        | 35.9              | 38.5                |
|                             | SD      |         | 7.3                | 3.0     | 2.6                         | 5.0               | 3.4                 |
| 21                          | average |         | 77.2               | 32.3    | 25.5                        | 40.2              | 42.9                |
|                             | SD      |         | 7.4                | 3.2     | 2.1                         | 4.2               | 3.2                 |
| 28                          | average |         | 89.8               | 37.0    | 30.4                        | 45.2              | 48.0                |
|                             | SD      |         | 7.5                | 4.2     | 3.3                         | 4.7               | 2.7                 |
| 35                          | average |         | 100.0              | 42.4    | 34.0                        | 47.7              | 52.6                |
|                             | SD      |         | 7.8                | 3.5     | 2.1                         | 2.4               | 2.1                 |
| 42                          | average |         | 112.7              | 47.6    | 38.3                        | 53.7              | 61.2                |
|                             | SD      |         | 8.0                | 3.6     | 2.6                         | 3.3               | 4.3                 |
| 49                          | average |         | 122.6              | 52.7    | 41.9                        | 59.5              | 67.4                |
|                             | SD      |         | 6.3                | 3.3     | 2.4                         | 4.2               | 4.2                 |
| 56                          | average |         | 131.9              | 44.9    | 45.9                        | 60.9              | 61.6                |
|                             | SD      |         | 8.1                | 24.9    | 3.2                         | 3.8               | 4.4                 |
| 63                          | average |         | 138.7              | 57.9    | 48.7                        | 61.6              | 48.4                |
|                             | SD      |         | 11.9               | 5.5     | 4.6                         | 5.0               | 7.6                 |
| 70                          | average |         | 143.0              | 60.2    | 51.2                        | 67.6              | 62.3                |
|                             | SD      |         | 5.8                | 2.8     | 2.8                         | 3.1               | 3.3                 |
| 80                          | average |         | 156.7              | 64.4    | 56.6                        | 79.3              | 76.6                |
|                             | SD      |         | 9.4                | 4.0     | 3.4                         | 4.1               | 3.8                 |
| 91                          | average |         | 169.5              | 70.0    | 62.2                        | 87.2              | 84.0                |
|                             | SD      |         | 11.2               | 4.9     | 4.0                         | 6.7               | 6.2                 |
| 101                         | average |         | 183.3              | 76.5    | 67.7                        | 88.2              | 67.8                |
|                             | SD      |         | 14.4               | 6.8     | 5.8                         | 5.7               | 18.9                |
| 108                         | average |         | 197.4              | 82.8    | 73.6                        | 105.0             | 110.2               |
|                             | SD      |         | 7.7                | 3.7     | 3.2                         | 5.4               | 12.6                |
| 122                         | average |         | 124.7              | 49.5    | 43.9                        | 64.5              | 65.9                |
|                             | SD      |         | 5.5                | 2.3     | 1.8                         | 2.2               | 2.5                 |

|     |         |       |      |      |      |      |
|-----|---------|-------|------|------|------|------|
| 139 | average | 153.8 | 54.3 | 49.1 | 71.2 | 73.9 |
|     | SD      | 36.5  | 2.4  | 2.4  | 3.7  | 3.1  |

Note: Due to analytical interferences. migration of toluene from GPPS isooctane at 40 °C can not be measured

#### Relative migration - Results in %. Average values

| Migration time [days] | Toluene | Chloro-benzene | Styrene | Phenyl-cyclo-hexane | Benzo-phenone | Methyl-stearate |
|-----------------------|---------|----------------|---------|---------------------|---------------|-----------------|
| 0.25                  |         | 0.4            | 0.5     | 0.1                 | 0.3           | 0.5             |
| 0.5                   |         | 0.6            | 0.6     | 0.1                 | 0.3           | 0.4             |
| 1                     |         | 1.6            | 1.1     | 0.3                 | 0.5           | 0.6             |
| 2                     |         | 2.4            | 1.6     | 0.6                 | 1.3           | 0.9             |
| 6                     |         | 3.9            | 2.4     | 1.0                 | 1.6           | 1.4             |
| 14                    |         | 5.8            | 3.4     | 1.4                 | 2.4           | 2.2             |
| 17                    |         | 6.5            | 4.0     | 1.6                 | 2.9           | 2.6             |
| 21                    |         | 7.5            | 4.5     | 1.8                 | 3.2           | 2.9             |
| 28                    |         | 8.7            | 5.1     | 2.1                 | 3.6           | 3.3             |
| 35                    |         | 9.7            | 5.9     | 2.4                 | 3.8           | 3.6             |
| 42                    |         | 10.9           | 6.6     | 2.6                 | 4.3           | 4.2             |
| 49                    |         | 11.9           | 7.3     | 2.9                 | 4.8           | 4.6             |
| 56                    |         | 12.8           | 6.2     | 3.2                 | 4.9           | 4.2             |
| 63                    |         | 13.4           | 8.0     | 3.4                 | 4.9           | 3.3             |
| 70                    |         | 13.8           | 8.3     | 3.5                 | 5.4           | 4.2             |
| 80                    |         | 15.2           | 8.9     | 3.9                 | 6.3           | 5.2             |
| 91                    |         | 16.4           | 9.7     | 4.3                 | 7.0           | 5.7             |
| 101                   |         | 17.7           | 10.6    | 4.7                 | 7.1           | 4.6             |
| 108                   |         | 19.1           | 11.5    | 5.1                 | 8.4           | 7.5             |
| 122                   |         | 12.1           | 6.9     | 3.0                 | 5.2           | 4.5             |
| 139                   |         | 14.9           | 7.5     | 3.4                 | 5.7           | 5.0             |

#### Migration Kinetics - Results in µg/dm<sup>2</sup>. Average values

| Migration time [days] | Oligo-1 | Oligo-2 | Oligo-3 | Oligo-4 | Oligo-5 | Oligo-6 | Oligo-7 | Oligo-8 |
|-----------------------|---------|---------|---------|---------|---------|---------|---------|---------|
| 0.25                  | n.d.    | 6.6     | 7.5     | 9.9     | 26.1    | 1.8     | 3.4     | n.d.    |
| 0.5                   | n.d.    | 7.3     | 11.9    | 10.9    | 25.0    | 10.4    | 3.7     | 1.6     |
| 1                     | n.d.    | 10.5    | 18.2    | 20.1    | 45.2    | 24.6    | 5.1     | 1.6     |
| 2                     | 3.6     | 15.4    | 28.8    | 26.8    | 86.7    | 33.5    | 8.6     | 3.3     |
| 6                     | 6.3     | 24.9    | 54.7    | 67.8    | 149.0   | 55.5    | 16.1    | 4.5     |
| 14                    | 9.2     | 35.4    | 70.1    | 105.4   | 228.7   | 77.9    | 24.6    | 8.1     |
| 17                    | 12.7    | 40.2    | 131.1   | 126.7   | 276.1   | 95.5    | 32.5    | 9.9     |
| 21                    | 13.4    | 44.5    | 130.9   | 140.8   | 306.3   | 104.1   | 34.0    | 11.2    |
| 28                    | 13.5    | 49.0    | 131.9   | 121.5   | 329.6   | 106.3   | 35.3    | 9.3     |
| 35                    | 14.6    | 55.9    | 150.0   | 177.6   | 384.4   | 125.7   | 34.5    | 13.1    |



|     |      |       |       |       |        |       |       |      |
|-----|------|-------|-------|-------|--------|-------|-------|------|
| 42  | 15.9 | 60.0  | 163.8 | 193.6 | 418.7  | 130.6 | 44.4  | 14.3 |
| 49  | 18.7 | 67.5  | 189.2 | 181.0 | 476.4  | 146.8 | 51.1  | 15.9 |
| 56  | 16.6 | 66.1  | 163.9 | 205.5 | 444.9  | 134.3 | 46.7  | 14.3 |
| 63  | 18.7 | 75.8  | 182.1 | 228.2 | 488.9  | 145.2 | 52.3  | 15.4 |
| 70  | 20.3 | 79.6  | 194.3 | 243.1 | 522.6  | 155.7 | 55.9  | 16.7 |
| 80  | 23.5 | 86.3  | 213.7 | 264.1 | 571.6  | 171.3 | 42.5  | 18.8 |
| 91  | 24.0 | 92.5  | 230.3 | 283.8 | 613.3  | 181.3 | 55.0  | 20.3 |
| 101 | 25.9 | 101.0 | 241.0 | 301.9 | 649.2  | 188.9 | 64.0  | 21.3 |
| 108 | 26.9 | 105.8 | 265.3 | 624.5 | 667.0  | 201.5 | 70.5  | 23.9 |
| 122 | 31.3 | 115.3 | 342.9 | 435.8 | 947.7  | 286.8 | 111.2 | 35.5 |
| 139 | 33.1 | 123.7 | 365.1 | 461.0 | 1011.7 | 302.1 | 114.4 | 37.6 |

### Relative migration - Results in %. Average values

| Migration time [days] | Oligo-1 | Oligo-2 | Oligo-3 | Oligo-4 | Oligo-5 | Oligo-6 | Oligo-7 | Oligo-8 |
|-----------------------|---------|---------|---------|---------|---------|---------|---------|---------|
| 0.25                  | 0.0     | 0.6     | 0.3     | 0.4     | 0.5     | 0.1     | 0.6     | n.d.    |
| 0.5                   | 0.0     | 0.6     | 0.4     | 0.5     | 0.5     | 0.8     | 0.7     | 0.9     |
| 1                     | 0.0     | 0.9     | 0.6     | 0.9     | 0.9     | 1.8     | 1.0     | 0.9     |
| 2                     | 1.0     | 1.4     | 1.0     | 1.2     | 1.8     | 2.5     | 1.6     | 1.9     |
| 6                     | 1.7     | 2.2     | 1.9     | 3.0     | 3.1     | 4.1     | 3.0     | 2.6     |
| 14                    | 2.5     | 3.1     | 2.5     | 4.7     | 4.8     | 5.8     | 4.6     | 4.7     |
| 17                    | 3.5     | 3.6     | 4.6     | 5.7     | 5.8     | 7.1     | 6.1     | 5.7     |
| 21                    | 3.6     | 3.9     | 4.6     | 6.3     | 6.4     | 7.7     | 6.4     | 6.4     |
| 28                    | 3.7     | 4.3     | 4.6     | 5.4     | 6.9     | 7.9     | 6.6     | 5.3     |
| 35                    | 4.0     | 5.0     | 5.3     | 7.9     | 8.1     | 9.3     | 6.5     | 7.5     |
| 42                    | 4.3     | 5.3     | 5.8     | 8.6     | 8.8     | 9.7     | 8.3     | 8.2     |
| 49                    | 5.1     | 6.0     | 6.6     | 8.1     | 10.0    | 10.9    | 9.6     | 9.1     |
| 56                    | 4.5     | 5.9     | 5.8     | 9.2     | 9.3     | 10.0    | 8.8     | 8.2     |
| 63                    | 5.1     | 6.7     | 6.4     | 10.2    | 10.3    | 10.8    | 9.8     | 8.8     |
| 70                    | 5.5     | 7.1     | 6.8     | 10.9    | 11.0    | 11.6    | 10.5    | 9.6     |
| 80                    | 6.4     | 7.7     | 7.5     | 11.8    | 12.0    | 12.7    | 8.0     | 10.8    |
| 91                    | 6.5     | 8.2     | 8.1     | 12.7    | 12.9    | 13.5    | 10.3    | 11.6    |
| 101                   | 7.0     | 9.0     | 8.5     | 13.5    | 13.6    | 14.0    | 12.0    | 12.2    |
| 108                   | 7.3     | 9.4     | 9.3     | 27.9    | 14.0    | 15.0    | 13.2    | 13.7    |
| 122                   | 8.5     | 10.2    | 12.0    | 19.5    | 19.9    | 21.3    | 20.9    | 20.4    |
| 139                   | 9.0     | 11.0    | 12.8    | 20.6    | 21.2    | 22.4    | 21.5    | 21.6    |

Weight increase- Results in %. Average values and standard deviation (N=3)

| Time contact<br>[days] | Weight increase<br>[%] | SD   |
|------------------------|------------------------|------|
| 0.17                   | 0.1                    | 0.01 |
| 0.35                   | 0.1                    | 0.01 |
| 1                      | 0.1                    | 0.01 |
| 2                      | 0.1                    | 0.02 |
| 3                      | 0.1                    | 0.02 |
| 6                      | 0.1                    | 0.02 |
| 8                      | 0.2                    | 0.01 |
| 13                     | 0.3                    | 0.01 |
| 17                     | 0.3                    | 0.01 |
| 23                     | 0.4                    | 0.01 |
| 29                     | 0.6                    | 0.03 |
| 45                     | 0.9                    | 0.03 |
| 65                     | 1.1                    | 0.01 |
| 99                     | 1.7                    | 0.03 |
| 114                    | 1.9                    | 0.05 |

### 3 Migration in isooctane at 20 °C

Migration Kinetics - Results in  $\mu\text{g}/\text{dm}^2$ . Average values and standard deviation (N=3)

| Migration time [days] |         | Toluene | Chloro-benzene | Styrene | Phenyl-cyclo-hexane | Benzo-phenone | Methyl-stearate |
|-----------------------|---------|---------|----------------|---------|---------------------|---------------|-----------------|
| 1                     | average |         |                | 3.88    | 0.78                | 1.06          | 1.30            |
|                       | SD      |         |                | 1.96    | 0.00                | 0.00          | 0.50            |
| 3                     | average |         | 4.96           | 4.35    | 1.87                | 2.34          | 2.93            |
|                       | SD      |         | 3.28           | 2.18    | 0.14                | 1.08          | 0.62            |
| 6                     | average |         | 6.45           | 4.56    | 2.16                | 3.14          | 3.82            |
|                       | SD      |         | 3.01           | 3.38    | 0.00                | 0.89          | 0.37            |
| 14                    | average |         | 15.24          | 8.30    | 2.97                | 4.66          | 5.12            |
|                       | SD      |         | 1.19           | 0.84    | 0.28                | 0.40          | 0.51            |
| 21                    | average |         | 10.89          | 10.68   | 3.78                | 7.78          | 6.58            |
|                       | SD      |         | 1.28           | 0.75    | 0.57                | 4.49          | 0.41            |
| 28                    | average |         | 16.53          | 10.88   | 4.07                | 6.18          | 6.02            |
|                       | SD      |         | 5.43           | 1.78    | 0.19                | 0.50          | 0.40            |
| 35                    | average |         | 19.99          | 11.15   | 4.53                | 7.22          | 6.75            |
|                       | SD      |         | 5.60           | 2.99    | 0.14                | 0.56          | 0.84            |
| 42                    | average |         | 21.76          | 13.06   | 4.59                | 7.86          | 6.75            |
|                       | SD      |         | 7.38           | 1.03    | 0.62                | 1.86          | 0.48            |
| 49                    | average |         | 29.87          | 14.28   | 4.64                | 7.94          | 7.32            |
|                       | SD      |         | 2.92           | 1.48    | 0.34                | 0.66          | 0.53            |
| 56                    | average |         | 32.44          | 12.99   | 5.05                | 6.26          | 5.93            |
|                       | SD      |         | 3.05           | 1.25    | 0.18                | 0.36          | 0.78            |
| 63                    | average |         | 30.96          | 10.88   | 4.93                | 6.50          | 6.10            |
|                       | SD      |         | 2.90           | 5.25    | 0.66                | 0.58          | 0.67            |
| 70                    | average |         | 32.34          | 11.36   | 5.28                | 6.98          | 6.10            |
|                       | SD      |         | 2.96           | 5.60    | 0.58                | 0.78          | 0.41            |
| 80                    | average |         | 34.91          | 13.33   | 5.45                | 7.86          | 6.18            |
|                       | SD      |         | 3.47           | 1.50    | 0.75                | 1.53          | 0.91            |
| 91                    | average |         | 37.97          | 14.55   | 5.57                | 7.54          | 6.34            |
|                       | SD      |         | 3.41           | 1.17    | 0.51                | 0.59          | 0.31            |
| 101                   | average |         | 41.43          | 14.76   | 5.91                | 8.18          | 3.98            |
|                       | SD      |         | 4.43           | 1.85    | 0.55                | 1.59          | 0.37            |
| 108                   | average |         | 43.80          | 16.52   | 1.87                | 1.06          |                 |
|                       | SD      |         | 4.13           | 2.26    | 2.18                | 0.00          |                 |
| 122                   | average |         | 27.00          | 8.23    | 3.95                | 7.62          | 4.80            |
|                       | SD      |         | 2.79           | 1.05    | 0.34                | 1.08          | 2.59            |
| 139                   | average |         | 29.18          | 8.57    | 4.35                | 7.46          | 5.93            |
|                       | SD      |         | 3.51           | 1.32    | 0.42                | 0.39          | 0.20            |

Note: Due to analytical interferences, migration of toluene from GPPS isooctane at 20 °C can not be measured

Relative migration - Results in %. Average values

| Migration time [days] | Toluene | Chloro-benzene | Styrene | Phenyl-cyclo-hexane | Benzo-phenone | Methyl-stearate |
|-----------------------|---------|----------------|---------|---------------------|---------------|-----------------|
| 1                     |         | 0.0            | 0.5     | 0.1                 | 0.1           | 0.0             |
| 3                     |         | 0.5            | 0.6     | 0.1                 | 0.2           | 0.2             |
| 6                     |         | 0.6            | 0.6     | 0.1                 | 0.3           | 0.3             |
| 14                    |         | 1.5            | 1.1     | 0.2                 | 0.4           | 0.3             |
| 21                    |         | 1.1            | 1.5     | 0.3                 | 0.6           | 0.4             |
| 28                    |         | 1.6            | 1.5     | 0.3                 | 0.5           | 0.4             |
| 35                    |         | 1.9            | 1.5     | 0.3                 | 0.6           | 0.5             |
| 42                    |         | 2.1            | 1.8     | 0.3                 | 0.6           | 0.5             |
| 49                    |         | 2.9            | 2.0     | 0.3                 | 0.6           | 0.5             |
| 56                    |         | 3.1            | 1.8     | 0.3                 | 0.5           | 0.4             |
| 63                    |         | 3.0            | 1.5     | 0.3                 | 0.5           | 0.4             |
| 70                    |         | 3.1            | 1.6     | 0.4                 | 0.6           | 0.4             |
| 80                    |         | 3.4            | 1.8     | 0.4                 | 0.6           | 0.4             |
| 91                    |         | 3.7            | 2.0     | 0.4                 | 0.6           | 0.4             |
| 101                   |         | 4.0            | 2.0     | 0.4                 | 0.7           | 0.3             |
| 108                   |         | 4.2            | 2.3     | 0.1                 | 0.1           | 0.0             |
| 122                   |         | 2.6            | 1.1     | 0.3                 | 0.6           | 0.3             |
| 139                   |         | 2.8            | 1.2     | 0.3                 | 0.6           | 0.4             |

Migration of oligomers from GPPS into isooctane at 20 °C was not detectable.

The weight increase of GPPS in isooctane at 20 °C remains < 0.01% until 73 days.

#### 4 Migration and weight increase in 95% ethanol at 60 °C

Migration Kinetics - Results in  $\mu\text{g}/\text{dm}^2$ . Average values and standard deviation (N=3)

| Migration time [days] |         | Toluene | Chloro-benzene | Styrene | Phenyl-cyclo-hexane | Benzo-phenone | Methyl-stearate |
|-----------------------|---------|---------|----------------|---------|---------------------|---------------|-----------------|
| 0.04                  | average | 20.3    |                | 28.6    | 152.2               | 5.9           | 23.8            |
|                       | SD      | 0.0     |                | 1.1     | 2.7                 | 0.5           | 1.2             |
| 0.08                  | average | 24.7    |                | 41.9    | 154.7               | 9.4           | 31.2            |
|                       | SD      | 0.6     |                | 1.4     | 5.7                 | 0.6           | 3.1             |
| 0.17                  | average | 31.5    | 47.3           | 57.5    | 153.3               | 14.6          | 41.3            |
|                       | SD      | 1.0     | 1.9            | 2.4     | 4.0                 | 1.5           | 3.3             |
| 0.25                  | average | 36.1    | 62.3           | 65.4    | 153.3               | 17.3          | 44.7            |
|                       | SD      | 3.5     | 1.9            | 1.9     | 3.4                 | 1.0           | 2.2             |
| 0.33                  | average | 59.6    | 76.6           | 73.1    | 152.5               | 18.7          | 49.5            |
|                       | SD      | 5.6     | 4.0            | 2.5     | 3.3                 | 3.1           | 4.1             |
| 0.42                  | average | 67.6    | 90.1           | 81.1    | 151.7               | 31.6          | 53.4            |
|                       | SD      | 6.0     | 3.6            | 2.1     | 1.3                 | 22.5          | 3.1             |
| 1                     | average | 141.6   | 197.8          | 138.8   | 155.2               | 43.5          | 86.7            |
|                       | SD      | 8.1     | 5.1            | 3.9     | 4.6                 | 1.1           | 3.2             |
| 2                     | average | 270.5   | 346.2          | 220.4   | 154.1               | 74.4          | 134.0           |
|                       | SD      | 26.9    | 9.7            | 5.6     | 2.4                 | 2.0           | 4.4             |
| 3                     | average | 388.2   | 383.7          | 283.9   | 156.6               | 100.3         | 171.4           |
|                       | SD      | 35.9    | 188.1          | 9.0     | 5.1                 | 2.1           | 6.6             |
| 7                     | average | 666.0   | 777.0          | 461.5   | 154.7               | 169.6         | 272.8           |
|                       | SD      | 18.2    | 21.5           | 12.2    | 4.6                 | 1.3           | 7.3             |
| 10                    | average | 720.3   | 914.2          | 554.9   | 151.1               | 210.3         | 329.6           |
|                       | SD      | 45.7    | 40.3           | 20.7    | 0.0                 | 6.7           | 12.1            |
| 14                    | average | 861.1   | 1011.7         | 631.8   |                     | 260.1         | 393.9           |
|                       | SD      | 87.7    | 27.6           | 21.5    |                     | 8.5           | 16.1            |
| 21                    | average | 942.7   | 1091.1         | 708.1   | 151.1               | 326.9         | 487.5           |
|                       | SD      | 30.1    | 20.6           | 15.5    | 0.0                 | 6.8           | 22.8            |
| 28                    | average | 1016.7  | 957.7          | 749.4   | 151.1               | 387.9         | 581.4           |
|                       | SD      | 140.7   | 396.0          | 16.0    | 0.0                 | 9.2           | 19.1            |
| 35                    | average | 1014.5  | 1132.0         | 772.3   | 151.1               | 440.0         | 665.2           |
|                       | SD      | 117.9   | 33.0           | 26.6    | 0.0                 | 17.2          | 32.0            |
| 42                    | average | 921.9   | 1080.6         | 863.9   | 151.1               | 495.0         | 664.9           |
|                       | SD      | 107.3   | 57.6           | 23.6    | 0.0                 | 19.2          | 25.6            |
| 60                    | average | 880.9   | 1051.9         | 728.8   | 151.1               | 505.2         | 668.4           |
|                       | SD      | 151.5   | 56.7           | 40.2    | 0.0                 | 19.4          | 41.3            |
| 73                    | average | 845.4   | 1102.0         | 768.3   | 151.1               | 579.0         | 785.7           |
|                       | SD      | 47.2    | 83.7           | 62.8    | 0.0                 | 45.6          | 65.1            |
| 84                    | average | 805.3   | 1011.9         | 704.0   | 151.1               | 592.8         | 856.1           |
|                       | SD      | 101.5   | 55.2           | 27.5    | 0.0                 | 16.6          | 41.9            |
| 94                    | average | 816.3   | 802.7          | 680.5   | 151.1               | 611.7         | 888.7           |
|                       | SD      | 61.0    | 400.2          | 42.2    | 0.0                 | 31.6          | 49.8            |

|            |         |       |        |       |       |       |       |
|------------|---------|-------|--------|-------|-------|-------|-------|
| <b>105</b> | average | 841.0 | 1003.1 | 713.4 | 151.1 | 673.0 | 958.8 |
|            | SD      | 76.7  | 61.3   | 49.5  | 0.0   | 51.2  | 64.0  |

#### Relative migration - Results in %. Average values

| Migration time [days] | Toluene | Chloro-benzene | Styrene | Phenyl-cyclo-hexane | Benzo-phenone | Methyl-stearate |
|-----------------------|---------|----------------|---------|---------------------|---------------|-----------------|
| 0.04                  | 2.4     | 0.0            | 4.0     | 0.3                 | 1.9           | 4.4             |
| 0.08                  | 2.4     | 0.0            | 4.0     | 0.4                 | 1.9           | 4.4             |
| 0.17                  | 2.9     | 0.9            | 5.8     | 0.7                 | 2.5           | 4.8             |
| 0.25                  | 3.7     | 4.6            | 8.0     | 1.0                 | 3.3           | 5.5             |
| 0.33                  | 4.2     | 6.0            | 9.1     | 1.2                 | 3.6           | 5.5             |
| 0.42                  | 7.0     | 7.4            | 10.1    | 1.3                 | 4.0           | 5.8             |
| 1                     | 7.9     | 8.7            | 11.2    | 2.2                 | 4.3           | 5.9             |
| 2                     | 16.6    | 19.1           | 19.2    | 3.0                 | 6.9           | 7.4             |
| 3                     | 31.6    | 33.5           | 30.5    | 5.1                 | 10.7          | 9.3             |
| 7                     | 45.4    | 37.1           | 39.3    | 6.9                 | 13.7          | 11.2            |
| 10                    | 77.9    | 75.2           | 64.0    | 11.7                | 21.8          | 14.9            |
| 14                    | 84.3    | 88.5           | 76.9    | 14.5                | 26.4          | 20.0            |
| 21                    | 100.7   | 97.9           | 87.6    | 18.0                | 31.5          | 19.0            |
| 28                    | 109.1   | 104.5          | 96.5    | 21.8                | 37.6          | 23.0            |
| 35                    | 118.9   | 92.7           | 103.8   | 26.8                | 46.5          | 30.3            |
| 42                    | 118.7   | 109.6          | 107.0   | 30.4                | 53.2          | 41.0            |
| 60                    | 107.8   | 104.6          | 119.7   | 34.2                | 53.2          | 31.3            |
| 73                    | 103.0   | 101.8          | 101.0   | 35.0                | 53.4          | 36.8            |
| 84                    | 98.9    | 106.7          | 106.5   | 40.1                | 62.8          | 42.2            |
| 94                    | 94.2    | 97.9           | 97.6    | 41.0                | 68.5          | 44.2            |
| 105                   | 95.5    | 77.7           | 94.3    | 42.3                | 71.1          | 49.9            |

#### Migration Kinetics - Results in $\mu\text{g}/\text{dm}^2$ . Average values

| Migration time [days] | Oligo-1 | Oligo-2 | Oligo-3 | Oligo-4 | Oligo-5 | Oligo-6 | Oligo-7 | Oligo-8 |
|-----------------------|---------|---------|---------|---------|---------|---------|---------|---------|
| 0.04                  | n.d.    | 5.4     | 3.1     | 3.4     | 10.7    | n.d.    | n.d.    | n.d.    |
| 0.08                  | n.d.    | 8.2     | 4.0     | 4.9     | 15.9    | 4.0     | n.d.    | n.d.    |
| 0.17                  | 2.6     | 11.8    | 5.8     | 7.0     | 20.0    | 5.5     | n.d.    | n.d.    |
| 0.25                  | 5.3     | 13.3    | 6.5     | 7.6     | 19.9    | 5.8     | n.d.    | n.d.    |
| 0.33                  | 4.9     | 14.5    | 7.2     | 8.0     | 21.2    | 6.3     | n.d.    | n.d.    |
| 0.42                  | 5.3     | 15.6    | 7.6     | 7.6     | 21.9    | 6.5     | 2.5     | n.d.    |
| 1                     | 10.5    | 25.5    | 11.5    | n.d.    | 33.1    | 10.0    | 3.7     | n.d.    |
| 2                     | 18.0    | 39.6    | 17.2    | 14.9    | 47.8    | 14.3    | 6.1     | n.d.    |
| 3                     | 24.0    | 51.4    | 21.4    | 21.5    | 58.0    | 17.8    | 7.9     | 2.7     |
| 7                     | 35.6    | 80.1    | 31.4    | 29.9    | 83.4    | 25.0    | 11.5    | 4.7     |
| 10                    | 43.4    | 96.8    | 37.1    | 35.2    | 96.2    | 29.1    | 13.2    | 5.5     |
| 14                    | 51.7    | 117.2   | 42.7    | 40.7    | 112.2   | 33.6    | 15.0    | 6.9     |

|     |       |       |       |       |       |       |      |      |
|-----|-------|-------|-------|-------|-------|-------|------|------|
| 21  | 67.2  | 152.3 | 57.7  | 53.1  | 150.0 | 43.7  | 20.6 | 8.5  |
| 28  | 81.1  | 180.9 | 66.0  | 62.0  | 167.0 | 52.6  | 25.8 | 9.4  |
| 35  | 91.5  | 201.8 | 76.6  | 69.0  | 191.3 | 62.6  | 24.7 | 10.4 |
| 42  | 107.3 | 235.1 | 106.7 | 78.2  | 217.4 | 75.9  | 27.7 | 17.0 |
| 60  | 122.8 | 267.4 | 96.8  | 84.3  | 240.6 | 75.6  | 36.8 | 16.0 |
| 73  | 141.8 | 313.2 | 110.6 | 95.6  | 280.1 | 84.9  | 39.7 | 27.6 |
| 84  | 153.2 | 335.0 | 119.2 | 103.4 | 291.8 | 92.6  | 49.7 | 19.4 |
| 94  | 158.6 | 347.3 | 133.8 | 116.2 | 328.9 | 104.6 | 44.3 | 20.9 |
| 105 | 165.4 | 363.8 | 138.7 | 120.3 | 336.3 | 103.2 | 49.5 | 21.4 |

# Relative migration - Results in %. Average values

| Migration time [days] | Oligo-1 | Oligo-2 | Oligo-3 | Oligo-4 | Oligo-5 | Oligo-6 | Oligo-7 | Oligo-8 |
|-----------------------|---------|---------|---------|---------|---------|---------|---------|---------|
| 0.04                  | n.d.    | 0.4     | n.d.    | 0.1     | 0.2     | 0.2     | n.d.    | n.d.    |
| 0.08                  | n.d.    | 0.5     | 0.1     | 0.2     | 0.2     | n.d.    | n.d.    | n.d.    |
| 0.17                  | n.d.    | 0.7     | 0.1     | 0.2     | 0.3     | 0.3     | n.d.    | n.d.    |
| 0.25                  | 0.7     | 1.0     | 0.2     | 0.3     | 0.4     | 0.4     | n.d.    | n.d.    |
| 0.33                  | 1.4     | 1.2     | 0.2     | 0.3     | 0.4     | 0.4     | n.d.    | n.d.    |
| 0.42                  | 1.3     | 1.3     | 0.3     | 0.4     | 0.4     | 0.5     | n.d.    | n.d.    |
| 1                     | 1.4     | 1.4     | 0.3     | 0.3     | 0.5     | 0.5     | 0.5     | n.d.    |
| 2                     | 2.9     | 2.3     | 0.4     | n.d.    | 0.7     | 0.7     | 0.7     | n.d.    |
| 3                     | 4.9     | 3.5     | 0.6     | 0.7     | 1.0     | 1.1     | 1.2     | n.d.    |
| 7                     | 6.5     | 4.6     | 0.8     | 1.0     | 1.2     | 1.3     | 1.5     | 1.5     |
| 10                    | 9.6     | 7.1     | 1.1     | 1.3     | 1.7     | 1.9     | 2.2     | 2.7     |
| 14                    | 11.8    | 8.6     | 1.3     | 1.6     | 2.0     | 2.2     | 2.5     | 3.1     |
| 21                    | 14.0    | 10.4    | 1.5     | 1.8     | 2.4     | 2.5     | 2.8     | 4.0     |
| 28                    | 18.2    | 13.5    | 2.0     | 2.4     | 3.1     | 3.2     | 3.9     | 4.9     |
| 35                    | 22.0    | 16.0    | 2.3     | 2.8     | 3.5     | 3.9     | 4.8     | 5.4     |
| 42                    | 24.8    | 17.9    | 2.7     | 3.1     | 4.0     | 4.6     | 4.6     | 5.9     |
| 60                    | 29.1    | 20.9    | 3.7     | 3.5     | 4.6     | 5.6     | 5.2     | 9.7     |
| 73                    | 33.3    | 23.7    | 3.4     | 3.8     | 5.0     | 5.6     | 6.9     | 9.2     |
| 84                    | 38.4    | 27.8    | 3.9     | 4.3     | 5.9     | 6.3     | 7.4     | 15.8    |
| 94                    | 41.5    | 29.7    | 4.2     | 4.6     | 6.1     | 6.9     | 9.3     | 11.1    |
| 105                   | 43.0    | 30.8    | 4.7     | 5.2     | 6.9     | 7.8     | 8.3     | 12.0    |

Weight increase - Results in %. Average values and standard deviation (N=3)

| Time contact<br>[days] | Weight increase<br>[%] | SD   |
|------------------------|------------------------|------|
| 0.02                   | 0.2                    | 0.07 |
| 0.04                   | 0.3                    | 0.05 |
| 0.08                   | 0.4                    | 0.05 |
| 0.13                   | 0.6                    | 0.05 |
| 0.17                   | 0.7                    | 0.09 |
| 0.25                   | 1.0                    | 0.06 |
| 0.38                   | 1.1                    | 0.05 |
| 1                      | 3.0                    | 0.10 |
| 2                      | 3.4                    | 0.09 |
| 5                      | 3.8                    | 0.04 |
| 8                      | 3.9                    | 0.08 |
| 12                     | 4.1                    | 0.05 |
| 15                     | 4.1                    | 0.04 |
| 19                     | 4.4                    | 0.20 |
| 22                     | 4.4                    | 0.18 |
| 26                     | 4.4                    | 0.08 |
| 44                     | 5.5                    | 0.13 |
| 48                     | 5.4                    | 0.11 |
| 57                     | 6.1                    | 0.04 |
| 72                     | 6.9                    | 0.91 |
| 100                    | 8.1                    | 0.95 |
| 127                    | 11.0                   | 0.10 |
| 154                    | 11.9                   | 0.20 |
| 169                    | 13.3                   | 0.25 |
| 198                    | 15.9                   | 0.05 |



## 5 Migration and weight increase in 95% ethanol at 40 °C

Migration Kinetics - Results in  $\mu\text{g}/\text{dm}^2$ . Average values and standard deviation (N=3)

| Migration time [days] |         | Toluene | Chloro-benzene | Styrene | Phenyl-cyclo-hexane | Benzo-phenone | Methyl-stearate |
|-----------------------|---------|---------|----------------|---------|---------------------|---------------|-----------------|
| <b>0.21</b>           | average | 28.3    | 0.7            | 27.7    | 3.8                 | 20.0          | 58.8            |
|                       | SD      | 1.2     | 3.5            | 0.0     | 0.6                 | 1.0           | 1.0             |
| <b>0.42</b>           | average | 29.9    | 10.0           | 27.7    | 4.9                 | 24.0          | 58.8            |
|                       | SD      | 1.1     | 12.4           | 0.0     | 0.4                 | 2.4           | 1.8             |
| <b>1</b>              | average | 24.7    | 28.1           | 39.9    | 7.5                 | 27.3          | 60.3            |
|                       | SD      | 1.0     | 1.9            | 0.8     | 0.7                 | 3.5           | 1.5             |
| <b>2</b>              | average | 37.9    | 51.6           | 51.2    | 10.2                | 31.7          | 61.5            |
|                       | SD      | 3.1     | 1.7            | 1.7     | 1.1                 | 1.7           | 1.3             |
| <b>3</b>              | average | 44.1    | 72.3           | 62.8    | 12.3                | 35.6          | 67.2            |
|                       | SD      | 9.2     | 2.5            | 1.7     | 0.8                 | 2.1           | 2.4             |
| <b>7</b>              | average | 86.4    | 137.1          | 94.6    | 18.7                | 45.9          | 71.3            |
|                       | SD      | 5.9     | 3.6            | 1.5     | 0.8                 | 1.3           | 2.3             |
| <b>10</b>             | average | 109.1   | 176.8          | 115.0   | 22.6                | 53.1          | 74.3            |
|                       | SD      | 1.6     | 3.7            | 0.4     | 0.8                 | 2.6           | 1.1             |
| <b>14</b>             | average | 129.2   | 266.3          | 132.5   | 26.0                | 60.6          | 81.9            |
|                       | SD      | 5.6     | 102.7          | 6.4     | 5.4                 | 2.3           | 1.0             |
| <b>21</b>             | average | 162.6   | 280.6          | 161.1   | 30.9                | 69.3          | 92.5            |
|                       | SD      | 6.3     | 9.3            | 7.5     | 8.0                 | 3.3           | 1.5             |
| <b>28</b>             | average | 248.9   | 349.3          | 197.8   | 39.3                | 80.0          | 103.7           |
|                       | SD      | 4.5     | 12.2           | 18.2    | 1.7                 | 3.5           | 2.5             |
| <b>35</b>             | average | 274.7   | 396.1          | 211.1   | 42.0                | 85.9          | 100.8           |
|                       | SD      | 17.6    | 12.5           | 33.5    | 2.8                 | 2.1           | 2.3             |
| <b>42</b>             | average | 251.5   | 377.1          | 265.0   | 47.8                | 87.1          | 93.1            |
|                       | SD      | 4.3     | 22.6           | 2.6     | 1.7                 | 7.7           | 5.0             |
| <b>62</b>             | average | 349.7   | 484.6          | 266.9   | 48.5                | 96.8          | 116.2           |
|                       | SD      | 64.5    | 20.1           | 10.2    | 2.4                 | 3.5           | 1.8             |
| <b>73</b>             | average | 387.2   | 557.6          | 303.0   | 53.7                | 106.2         | 122.1           |
|                       | SD      | 31.0    | 38.8           | 17.1    | 2.9                 | 2.4           | 2.1             |
| <b>84</b>             | average | 443.0   | 573.5          | 310.8   | 54.4                | 110.8         | 123.1           |
|                       | SD      | 42.2    | 47.6           | 23.3    | 2.2                 | 2.8           | 1.7             |
| <b>94</b>             | average | 505.3   | 599.6          | 324.1   | 58.3                | 118.6         | 122.1           |
|                       | SD      | 29.2    | 29.2           | 14.5    | 2.9                 | 4.0           | 4.3             |
| <b>105</b>            | average | 451.8   | 612.7          | 333.3   | 60.4                | 124.5         | 129.3           |
|                       | SD      | 18.0    | 28.5           | 13.8    | 2.1                 | 3.5           | 2.7             |

Relative migration - Results in %. Average values

| Migration time [days] | Toluene | Chloro-benzene | Styrene | Phenyl-cyclo-hexane | Benzo-phenone | Methyl-stearate |
|-----------------------|---------|----------------|---------|---------------------|---------------|-----------------|
| 0.21                  | 3.31    | 0.07           | 3.84    | 0.26                | 1.60          | 4.00            |
| 0.42                  | 3.50    | 0.97           | 3.84    | 0.34                | 1.92          | 4.00            |
| 1                     | 2.89    | 2.72           | 5.52    | 0.52                | 2.18          | 4.10            |
| 2                     | 4.43    | 4.99           | 7.10    | 0.70                | 2.53          | 4.18            |
| 3                     | 5.16    | 7.00           | 8.70    | 0.85                | 2.85          | 4.56            |
| 7                     | 10.11   | 13.27          | 13.11   | 1.30                | 3.67          | 4.84            |
| 10                    | 12.76   | 17.11          | 15.94   | 1.56                | 4.25          | 5.05            |
| 14                    | 15.11   | 25.77          | 18.37   | 1.80                | 4.85          | 5.56            |
| 21                    | 19.03   | 27.15          | 22.32   | 2.14                | 5.54          | 6.28            |
| 28                    | 29.11   | 33.80          | 27.41   | 2.72                | 6.40          | 7.04            |
| 35                    | 32.14   | 38.34          | 29.25   | 2.91                | 6.87          | 6.85            |
| 42                    | 29.42   | 36.50          | 36.72   | 3.31                | 6.97          | 6.33            |
| 62                    | 40.91   | 46.90          | 36.99   | 3.36                | 7.74          | 7.90            |
| 73                    | 45.30   | 53.96          | 41.99   | 3.72                | 8.50          | 8.29            |
| 84                    | 51.82   | 55.51          | 43.08   | 3.77                | 8.86          | 8.36            |
| 94                    | 59.11   | 58.04          | 44.92   | 4.03                | 9.49          | 8.29            |
| 105                   | 52.85   | 59.30          | 46.19   | 4.18                | 9.96          | 8.78            |

Migration Kinetics - Results in  $\mu\text{g}/\text{dm}^2$ . Average values

| Migration time [days] | Oligo-1 | Oligo-2 | Oligo-3 | Oligo-4 | Oligo-5 | Oligo-6 | Oligo-7 | Oligo-8 |
|-----------------------|---------|---------|---------|---------|---------|---------|---------|---------|
| 0.21                  |         | 4.99    |         | 2.68    | 7.68    | 1.51    |         |         |
| 0.42                  |         | 5.46    |         | 3.32    | 8.46    | 2.25    |         |         |
| 1                     |         |         |         |         |         |         |         |         |
| 2                     |         | 8.01    |         | 4.06    | 11.10   | 2.86    |         |         |
| 3                     |         | 9.14    |         | 4.76    | 11.44   |         |         |         |
| 7                     |         |         |         |         |         |         |         |         |
| 10                    |         |         |         |         |         |         |         |         |
| 14                    | 4.90    | 15.55   | 3.64    | 6.00    | 16.39   | 4.37    |         |         |
| 21                    | 4.90    | 18.57   | 4.57    | 7.11    | 25.37   | 5.72    | 2.30    |         |
| 28                    |         | 22.11   | 4.64    | 7.18    | 21.19   | 6.28    | 1.86    |         |
| 35                    | 7.91    | 21.65   | 4.58    | 7.32    | 19.17   | 6.74    | 1.26    |         |
| 42                    |         | 15.07   | 18.70   | 7.64    | 19.71   | 7.30    |         |         |
| 62                    | 14.16   | 27.54   | 7.78    | 8.84    | 30.77   | 7.95    | 4.11    | 1.38    |
| 73                    | 15.70   | 29.61   | 6.95    | 8.76    | 26.24   | 4.24    | 3.39    | 1.76    |
| 84                    | 16.40   | 31.35   | 7.73    | 9.71    | 28.58   | 8.16    | 4.20    | 1.87    |
| 94                    | 17.22   | 32.71   | 7.80    | 9.78    | 29.22   | 9.98    | 4.11    | 2.40    |
| 105                   | 16.50   | 32.44   | 8.17    | 9.01    | 27.95   | 8.08    | 4.78    | 2.73    |

Relative migration - Results in %. Average values

| Migration time [days] | Oligo-1 | Oligo-2 | Oligo-3 | Oligo-4 | Oligo-5 | Oligo-6 | Oligo-7 | Oligo-8 |
|-----------------------|---------|---------|---------|---------|---------|---------|---------|---------|
| 0.21                  |         | 0.44    |         | 0.12    | 0.16    | 0.11    |         |         |
| 0.42                  |         | 0.48    |         | 0.15    | 0.18    | 0.17    |         |         |
| 1                     |         |         |         |         |         |         |         |         |
| 2                     |         | 0.71    |         | 0.18    | 0.23    | 0.21    |         |         |
| 3                     |         | 0.81    |         | 0.21    | 0.24    |         |         |         |
| 7                     |         |         |         |         |         |         |         |         |
| 10                    |         |         |         |         |         |         |         |         |
| 14                    |         | 1.38    | 0.13    | 0.27    | 0.34    | 0.32    |         |         |
| 21                    | 1.33    | 1.65    | 0.16    | 0.32    | 0.53    | 0.42    | 0.43    |         |
| 28                    |         | 1.96    | 0.16    | 0.32    | 0.44    | 0.47    | 0.35    |         |
| 35                    | 2.14    | 1.92    | 0.16    | 0.33    | 0.40    | 0.50    | 0.24    |         |
| 42                    |         | 1.34    | 0.66    | 0.34    | 0.41    | 0.54    |         |         |
| 62                    | 3.84    | 2.44    | 0.27    | 0.40    | 0.65    | 0.59    | 0.77    | 0.79    |
| 73                    | 4.25    | 2.63    | 0.24    | 0.39    | 0.55    | 0.31    | 0.64    | 1.01    |
| 84                    | 4.44    | 2.78    | 0.27    | 0.43    | 0.60    | 0.61    | 0.79    | 1.07    |
| 94                    | 4.67    | 2.90    | 0.27    | 0.44    | 0.61    | 0.74    | 0.77    | 1.38    |
| 105                   | 4.47    | 2.88    | 0.29    | 0.40    | 0.59    | 0.60    | 0.90    | 1.56    |

Weight increase - Results in %. Average values and standard deviation (N=3)

| Time contact [days] | Weight increase [%] | SD   |
|---------------------|---------------------|------|
| 0.16                | 0.6                 | 0.09 |
| 0.33                | 0.7                 | 0.04 |
| 1                   | 1.3                 | 0.05 |
| 2                   | 1.6                 | 0.05 |
| 5                   | 2.2                 | 0.33 |
| 8                   | 2.6                 | 0.34 |
| 12                  | 2.8                 | 0.05 |
| 15                  | 2.9                 | 0.22 |
| 19                  | 3.0                 | 0.21 |
| 22                  | 3.1                 | 0.08 |
| 26                  | 3.1                 | 0.34 |
| 44                  | 3.1                 | 0.33 |
| 48                  | 3.1                 | 0.06 |
| 57                  | 3.2                 | 0.24 |
| 72                  | 3.0                 | 0.22 |
| 100                 | 2.9                 | 0.07 |
| 127                 | 2.9                 | 0.18 |
| 154                 | 2.9                 | 0.17 |
| 169                 | 2.9                 | 0.05 |

## 6 Migration and weight increase in 95% ethanol at 20 °C

Migration Kinetics - Results in  $\mu\text{g}/\text{dm}^2$ . Average values and standard deviation (N=3)

| Migration time [days] |         | Toluene | Chloro-benzene | Styrene | Phenyl-cyclo-hexane | Benzo-phenone | Methyl-stearate |
|-----------------------|---------|---------|----------------|---------|---------------------|---------------|-----------------|
| 1                     | average | 37.5    | 8.9            |         | 2.2                 | 12.7          | 37.5            |
|                       | SD      | 4.5     | 0.0            |         | 0.7                 | 1.2           | 1.0             |
| 2                     | average | 38.1    | 8.9            |         | 3.2                 | 13.8          | 39.3            |
|                       | SD      | 1.5     | 0.0            |         | 0.4                 | 1.9           | 2.7             |
| 3                     | average | 37.5    | 8.9            |         | 3.7                 | 16.0          | 37.9            |
|                       | SD      | 1.2     | 0.0            |         | 0.7                 | 3.0           | 1.4             |
| 7                     | average | 38.1    | 8.9            |         | 4.2                 | 15.2          | 39.1            |
|                       | SD      | 0.5     | 0.0            |         | 0.4                 | 3.3           | 1.6             |
| 10                    | average | 35.7    | 24.1           |         | 4.0                 | 15.7          | 40.7            |
|                       | SD      | 3.6     | 7.5            |         | 1.3                 | 2.0           | 2.3             |
| 14                    | average | 35.3    | 47.7           |         | 7.8                 | 16.1          | 41.1            |
|                       | SD      | 1.3     | 33.3           |         | 5.2                 | 1.3           | 1.8             |
| 21                    | average | 31.1    | 40.5           | 3.2     | 5.6                 | 19.3          | 45.2            |
|                       | SD      | 0.5     | 4.7            | 8.3     | 0.4                 | 1.5           | 2.0             |
| 28                    | average | 36.9    | 52.3           | 13.9    | 6.1                 | 13.3          | 40.9            |
|                       | SD      | 0.9     | 1.9            | 1.8     | 0.4                 | 2.7           | 4.5             |
| 35                    | average | 40.4    | 59.9           | 19.9    | 8.7                 | 13.2          | 39.7            |
|                       | SD      | 1.9     | 3.7            | 1.4     | 2.8                 | 2.4           | 4.0             |
| 42                    | average | 41.1    | 41.4           | 25.9    | 4.6                 | 12.2          | 39.1            |
|                       | SD      | 0.9     | 4.4            | 0.9     | 3.0                 | 0.0           | 3.1             |
| 62                    | average | 65.9    | 91.5           | 31.5    | 8.7                 | 26.6          | 50.8            |
|                       | SD      | 3.2     | 2.3            | 17.5    | 0.7                 | 0.8           | 0.7             |
| 73                    | average | 73.9    | 105.9          | 48.7    | 9.1                 | 28.1          | 51.0            |
|                       | SD      | 2.5     | 6.2            | 4.5     | 0.4                 | 0.9           | 0.6             |
| 84                    | average | 93.8    | 107.5          | 49.1    | 8.3                 | 29.0          | 52.6            |
|                       | SD      | 14.3    | 6.3            | 5.0     | 2.3                 | 1.1           | 0.8             |
| 94                    | average | 113.6   | 122.5          | 55.3    | 9.9                 | 30.2          | 54.6            |
|                       | SD      | 10.9    | 5.3            | 3.5     | 0.4                 | 1.4           | 1.4             |
| 105                   | average | 101.2   | 131.7          | 64.1    | 10.7                | 31.0          | 53.0            |
|                       | SD      | 9.3     | 9.5            | 5.0     | 0.6                 | 0.9           | 0.6             |

Relative migration - Results in %. Average values

| Migration time [days] | Toluene | Chloro-benzene | Styrene | Phenyl-cyclo-hexane | Benzo-phenone | Methyl-stearate |
|-----------------------|---------|----------------|---------|---------------------|---------------|-----------------|
| 1                     | 4.4     | 0.9            |         | 0.2                 | 1.0           | 2.5             |
| 2                     | 4.5     | 0.9            |         | 0.2                 | 1.1           | 2.7             |
| 3                     | 4.4     | 0.9            |         | 0.3                 | 1.3           | 2.6             |
| 7                     | 4.5     | 0.9            |         | 0.3                 | 1.2           | 2.7             |

|     |      |      |     |     |     |     |
|-----|------|------|-----|-----|-----|-----|
| 10  | 4.2  | 2.3  |     | 0.3 | 1.3 | 2.8 |
| 14  | 4.1  | 4.6  |     | 0.5 | 1.3 | 2.8 |
| 21  | 3.6  | 3.9  | 0.4 | 0.4 | 1.5 | 3.1 |
| 28  | 4.3  | 5.1  | 1.9 | 0.4 | 1.1 | 2.8 |
| 35  | 4.7  | 5.8  | 2.8 | 0.6 | 1.1 | 2.7 |
| 42  | 4.8  | 4.0  | 3.6 | 0.3 | 1.0 | 2.7 |
| 62  | 7.7  | 8.9  | 4.4 | 0.6 | 2.1 | 3.5 |
| 73  | 8.6  | 10.2 | 6.7 | 0.6 | 2.2 | 3.5 |
| 84  | 11.0 | 10.4 | 6.8 | 0.6 | 2.3 | 3.6 |
| 94  | 13.3 | 11.9 | 7.7 | 0.7 | 2.4 | 3.7 |
| 105 | 11.8 | 12.7 | 8.9 | 0.7 | 2.5 | 3.6 |

#### Migration Kinetics - Results in $\mu\text{g}/\text{dm}^2$ . Average values

| Migration time [days] | Oligo-1 | Oligo-2 | Oligo-3 | Oligo-4 | Oligo-5 | Oligo-6 | Oligo-7 | Oligo-8 |
|-----------------------|---------|---------|---------|---------|---------|---------|---------|---------|
| 1                     |         |         |         |         |         |         |         |         |
| 2                     |         | 2.8     |         | 2.4     | 7.8     | 2.0     |         |         |
| 3                     |         | 4.2     |         | 2.9     | 7.1     | 1.9     |         |         |
| 7                     |         | 4.1     |         | 3.3     | 9.0     | 2.2     |         |         |
| 10                    |         | 4.8     |         | 3.6     | 9.4     | 2.8     |         |         |
| 14                    |         | 4.7     |         | 3.6     | 10.3    | 2.8     |         |         |
| 21                    |         | 5.1     | 3.6     | 4.3     | 18.8    | 3.0     |         |         |
| 28                    |         | 5.2     | 7.0     | 4.4     | 7.0     | 3.9     |         |         |
| 35                    |         | 4.7     | 6.0     | 4.5     | 7.9     | 4.4     |         |         |
| 42                    |         | 6.6     | 11.4    | 4.8     | 10.4    | 4.3     |         |         |
| 62                    | 6.2     | 7.0     | 3.6     | 6.2     | 20.0    | 5.5     |         |         |
| 73                    | 2.4     | 7.8     | 5.4     | 6.6     | 16.8    | 5.6     | 1.27    |         |
| 84                    | 3.1     | 8.4     | 3.6     | 6.8     | 18.2    | 5.0     | 2.55    |         |
| 94                    | 3.1     | 8.6     | 3.7     | 6.5     | 17.6    | 5.2     |         |         |
| 105                   | 2.6     | 8.7     | 3.7     | 6.4     | 17.0    | 4.5     |         |         |

#### Relative migration - Results in %. Average values

| Migration time [days] | Oligo-1 | Oligo-2 | Oligo-3 | Oligo-4 | Oligo-5 | Oligo-6 | Oligo-7 | Oligo-8 |
|-----------------------|---------|---------|---------|---------|---------|---------|---------|---------|
| 1                     | 0.0     | 0.0     |         | 0.0     | 0.0     | 0.0     | 0.0     |         |
| 2                     | 0.0     | 0.2     |         | 0.1     | 0.2     | 0.2     | 0.0     |         |
| 3                     | 0.0     | 0.4     |         | 0.1     | 0.1     | 0.1     | 0.0     |         |
| 7                     | 0.0     | 0.4     |         | 0.1     | 0.2     | 0.2     | 0.0     |         |
| 10                    | 0.0     | 0.4     |         | 0.2     | 0.2     | 0.2     | 0.0     |         |
| 14                    | 0.0     | 0.4     |         | 0.2     | 0.2     | 0.2     | 0.0     |         |
| 21                    | 0.0     | 0.5     | 0.1     | 0.2     | 0.4     | 0.2     | 0.0     |         |

|     |     |     |     |     |     |     |     |
|-----|-----|-----|-----|-----|-----|-----|-----|
| 28  | 0.0 | 0.5 | 0.2 | 0.2 | 0.1 | 0.3 | 0.0 |
| 35  | 0.0 | 0.4 | 0.2 | 0.2 | 0.2 | 0.3 | 0.0 |
| 42  | 0.0 | 0.6 | 0.4 | 0.2 | 0.2 | 0.3 | 0.0 |
| 62  | 1.7 | 0.6 | 0.1 | 0.3 | 0.4 | 0.4 | 0.0 |
| 73  | 0.6 | 0.7 | 0.2 | 0.3 | 0.4 | 0.4 | 0.0 |
| 84  | 0.8 | 0.7 | 0.1 | 0.3 | 0.4 | 0.4 | 0.0 |
| 94  | 0.9 | 0.8 | 0.1 | 0.3 | 0.4 | 0.4 | 0.0 |
| 105 | 0.7 | 0.8 | 0.1 | 0.3 | 0.4 | 0.3 | 0.0 |

Weight increase - Results in %. Average values and standard deviation (N=3)

| Time contact<br>[days] | Weight increase<br>[%] | SD   |
|------------------------|------------------------|------|
| 2                      | 0.7                    | 0.04 |
| 5                      | 1.1                    | 0.14 |
| 8                      | 1.2                    | 0.22 |
| 12                     | 1.4                    | 0.09 |
| 15                     | 1.6                    | 0.08 |
| 19                     | 1.7                    | 0.09 |
| 22                     | 1.8                    | 0.03 |
| 26                     | 1.8                    | 0.07 |
| 44                     | 2.4                    | 0.10 |
| 48                     | 2.4                    | 0.04 |
| 57                     | 2.5                    | 0.04 |
| 72                     | 2.7                    | 0.07 |
| 100                    | 2.8                    | 0.04 |
| 127                    | 2.9                    | 0.05 |
| 154                    | 3.0                    | 0.07 |
| 169                    | 3.0                    | 0.02 |
| 198                    | 3.1                    | 0.03 |
| 247                    | 3.2                    | 0.05 |

## 7 Migration and weight increase in 50% ethanol at 60 °C

Migration Kinetics - Results in  $\mu\text{g}/\text{dm}^2$ . Average values and standard deviation (N=3)

| Migration time [days] |         | Toluene | Chloro-benzene | Styrene | Phenyl-cyclo-hexane | Benzo-phenone | Methyl-stearate |
|-----------------------|---------|---------|----------------|---------|---------------------|---------------|-----------------|
| 1                     | average | 40.5    | 116.5          |         |                     | 11.6          |                 |
|                       | SD      | 08.5    | 115.8          |         |                     | 04.3          |                 |
| 2                     | average | 61.4    | 74.6           | 11.4    |                     | 12.2          |                 |
|                       | SD      | 09.1    | 21.7           | 10.7    |                     | 04.9          |                 |
| 3                     | average | 103.9   | 109.1          | 20.5    |                     | 18.5          |                 |
|                       | SD      | 12.4    | 11.1           | 33.4    |                     | 04.1          |                 |
| 7                     | average | 128.7   | 183.4          | 59.2    | 0.2                 | 26.4          |                 |
|                       | SD      | 63.3    | 39.6           | 18.9    | 2.0                 | 04.0          |                 |
| 10                    | average | 233.4   | 276.5          | 99.6    | 3.8                 | 27.6          |                 |
|                       | SD      | 14.8    | 12.4           | 09.0    | 1.6                 | 01.8          |                 |
| 14                    | average | 269.2   | 323.3          | 125.5   | 7.1                 | 30.7          |                 |
|                       | SD      | 19.3    | 17.9           | 11.1    | 2.5                 | 03.4          |                 |
| 21                    | average | 288.5   | 350.4          | 176.0   | 14.3                | 36.2          |                 |
|                       | SD      | 135.4   | 189.4          | 23.6    | 5.2                 | 04.7          |                 |
| 28                    | average | 357.4   | 480.9          | 210.7   | 17.1                | 41.3          |                 |
|                       | SD      | 34.3    | 29.1           | 16.3    | 2.2                 | 03.1          |                 |
| 35                    | average | 327.1   | 456.3          | 192.4   | 15.7                | 42.2          |                 |
|                       | SD      | 34.2    | 55.0           | 24.5    | 3.0                 | 04.0          |                 |
| 42                    | average | 197.0   | 283.9          | 115.7   | 11.1                | 55.1          |                 |
|                       | SD      | 44.4    | 63.6           | 43.1    | 02.8                | 05.6          |                 |
| 49                    | average | 292.9   | 455.3          | 201.5   | 24.6                | 55.3          |                 |
|                       | SD      | 36.2    | 34.0           | 17.1    | 6.6                 | 07.4          |                 |

Note: Due to analytical interferences, migration of methyl-stearate from GPPS in 50% ethanol at 60 °C can not be measured

Relative migration - Results in %. Average values

| Migration time [days] | Toluene | Chloro-benzene | Styrene | Phenyl-cyclo-hexane | Benzo-phenone | Methyl-stearate |
|-----------------------|---------|----------------|---------|---------------------|---------------|-----------------|
| 1                     | 4.7     |                |         |                     | 0.9           |                 |
| 2                     | 7.2     | 7.2            | 1.6     |                     | 1.0           |                 |
| 3                     | 12.1    | 10.6           | 2.8     |                     | 1.5           |                 |
| 7                     | 15.1    | 17.8           | 8.2     | 0.0                 | 2.1           |                 |
| 10                    | 27.3    | 26.8           | 13.8    | 0.3                 | 2.2           |                 |
| 14                    | 31.5    | 31.3           | 17.4    | 0.5                 | 2.5           |                 |
| 21                    | 33.8    | 33.9           | 24.4    | 1.0                 | 2.9           |                 |
| 28                    | 41.8    | 46.5           | 29.2    | 1.2                 | 3.3           |                 |
| 35                    | 38.3    | 44.2           | 26.7    | 1.1                 | 3.4           |                 |
| 42                    | 23.0    | 27.5           | 16.0    | 0.8                 | 4.4           |                 |
| 49                    | 34.3    | 44.1           | 27.9    | 1.7                 | 4.4           |                 |

### Migration Kinetics - Results in $\mu\text{g}/\text{dm}^2$ . Average values

| Migration time [days] | Oligo-1 | Oligo-2 | Oligo-3 | Oligo-4 | Oligo-5 | Oligo-6 | Oligo-7 | Oligo-8 |
|-----------------------|---------|---------|---------|---------|---------|---------|---------|---------|
| 1                     |         | 4.0     | 6.9     | 10.1    | 11.3    | 13.5    |         |         |
| 2                     |         | 5.1     | 7.0     | 8.9     | 8.7     | 19.7    |         |         |
| 3                     |         | 3.8     | 7.7     | 5.3     | 11.2    | 18.9    |         |         |
| 7                     |         | 8.4     | 12.4    | 9.4     | 25.2    | 7.2     |         |         |
| 10                    |         | 9.5     | 8.0     | 10.0    | 23.1    | 6.7     |         |         |
| 14                    |         | 9.0     | 8.5     | 9.9     | 23.8    | 7.1     |         |         |
| 21                    |         | 9.9     | 8.1     | 10.2    | 23.9    | 7.5     |         |         |
| 28                    |         | 9.5     | 9.9     | 10.3    | 24.9    | 7.8     |         |         |
| 35                    |         | 9.5     | 9.9     | 11.8    | 28.0    | 9.0     |         |         |
| 42                    |         | 11.2    | 12.2    | 30.0    | 8.7     | 3.9     |         |         |
| 49                    |         | 9.1     | 11.2    | 27.5    | 9.1     | 3.0     |         |         |

### Relative migration - Results in %. Average values

| Migration time [days] | Oligo-1 | Oligo-2 | Oligo-3 | Oligo-4 | Oligo-5 | Oligo-6 | Oligo-7 | Oligo-8 |
|-----------------------|---------|---------|---------|---------|---------|---------|---------|---------|
| 1                     |         | 0.4     | 0.2     | 0.4     | 0.2     | 1.0     |         |         |
| 2                     |         | 0.5     | 0.2     | 0.4     | 0.2     | 1.5     |         |         |
| 3                     |         | 0.3     | 0.3     | 0.2     | 0.2     | 1.4     |         |         |
| 7                     |         | 0.7     | 0.4     | 0.4     | 0.5     | 0.5     |         |         |
| 10                    |         | 0.8     | 0.3     | 0.4     | 0.5     | 0.5     |         |         |
| 14                    |         | 0.8     | 0.3     | 0.4     | 0.5     | 0.5     |         |         |
| 21                    |         | 0.9     | 0.3     | 0.5     | 0.5     | 0.6     |         |         |
| 28                    |         | 0.8     | 0.3     | 0.5     | 0.5     | 0.6     |         |         |
| 35                    |         | 0.8     | 0.3     | 0.5     | 0.6     | 0.7     |         |         |
| 42                    |         | 1.0     | 0.4     | 1.3     | 0.2     | 0.3     |         |         |
| 49                    |         | 0.8     | 0.4     | 1.2     | 0.2     | 0.2     |         |         |



Weight increase - Results in %. Average values and standard deviation (N=3)

| Time contact<br>[days] | Weight increase<br>[%] | SD   |
|------------------------|------------------------|------|
| 0.02                   | 0.5                    | 0.36 |
| 0.04                   | 0.2                    | 0.35 |
| 0.08                   | 0.2                    | 0.06 |
| 0.13                   | 0.4                    | 0.06 |
| 0.17                   | 0.3                    | 0.02 |
| 0.25                   | 0.4                    | 0.03 |
| 0.38                   | 0.4                    | 0.03 |
| 1                      | 1.0                    | 0.15 |
| 2                      | 1.1                    | 0.12 |
| 5                      | 1.3                    | 0.10 |
| 8                      | 1.2                    | 0.07 |
| 12                     | 1.2                    | 0.07 |
| 15                     | 1.2                    | 0.03 |
| 19                     | 1.2                    | 0.05 |
| 22                     | 1.3                    | 0.02 |
| 26                     | 1.2                    | 0.04 |
| 44                     | 1.2                    | 0.04 |
| 48                     | 1.2                    | 0.05 |
| 57                     | 1.2                    | 0.02 |
| 72                     | 1.2                    | 0.45 |
| 100                    | 1.3                    | 0.39 |
| 127                    | 1.4                    | 0.22 |

## 8 Migration and weight increase in 50% ethanol at 40 °C

Migration Kinetics - Results in  $\mu\text{g}/\text{dm}^2$ . Average values and standard deviation (N=3)

| Migration time [days] |         | Toluene | Chloro-benzene | Styrene | Phenyl-cyclo-hexane | Benzo-phenone | Methyl-stearate |
|-----------------------|---------|---------|----------------|---------|---------------------|---------------|-----------------|
| 0.2                   | average |         |                |         |                     | 7.7           |                 |
|                       | SD      |         |                |         |                     | 0.0           |                 |
| 0.4                   | average |         |                |         |                     | 8.6           |                 |
|                       | SD      |         |                |         |                     | 2.3           |                 |
| 1.0                   | average |         |                |         |                     | 7.7           |                 |
|                       | SD      |         |                |         |                     | 0.0           |                 |
| 2.0                   | average | 1.9     |                |         |                     | 7.7           |                 |
|                       | SD      | 0.0     |                |         |                     | 0.0           |                 |
| 3.0                   | average | 1.9     |                |         |                     | 7.7           |                 |
|                       | SD      | 0.0     |                |         |                     | 0.0           |                 |
| 7.0                   | average | 21.2    | 5.6            |         |                     | 7.7           |                 |
|                       | SD      | 6.8     | 11.1           |         |                     | 0.0           |                 |
| 14                    | average | 34.9    | 18.0           |         |                     | 7.7           |                 |
|                       | SD      | 11.7    | 14.8           |         |                     | 0.0           |                 |
| 21                    | average | 34.9    | 27.8           |         |                     | 8.1           |                 |
|                       | SD      | 0.0     | 8.5            |         |                     | 0.9           |                 |
| 28                    | average | 51.5    | 67.2           | 6.6     |                     | 7.7           |                 |
|                       | SD      | 38.8    | 12.1           | 8.0     |                     | 0.0           |                 |
| 35                    | average | 87.9    | 97.8           | 19.6    |                     | 9.6           |                 |
|                       | SD      | 7.4     | 8.1            | 12.0    |                     | 2.5           |                 |
| 42                    | average | 95.6    | 104.2          | 26.1    |                     | 8.6           |                 |
|                       | SD      | 13.5    | 17.3           | 5.0     |                     | 1.8           |                 |
| 49                    | average | 92.8    | 128.8          | 42.4    |                     | 7.7           |                 |
|                       | SD      | 9.1     | 22.4           | 8.0     |                     | 0.0           |                 |
| 59                    | average | 71.3    | 69.7           | 70.0    |                     | 21.4          |                 |
|                       | SD      | 7.4     | 116.2          | 153.6   |                     | 07.7          |                 |
| 76                    | average | 111.0   | 183.4          | 23.5    |                     | 20.7          |                 |
|                       | SD      | 9.1     | 24.3           | 8.7     |                     | 02.7          |                 |
| 87                    | average | 107.7   | 153.9          | 21.6    |                     | 21.8          |                 |
|                       | SD      | 9.1     | 48.3           | 8.2     |                     | 2.3           |                 |
| 98                    | average | 84.6    | 139.1          | 35.2    |                     | 22.4          |                 |
|                       | SD      | 56.1    | 60.4           | 24.5    |                     | 1.2           |                 |
| 108                   | average | 114.3   | 115.5          | 29.4    |                     | 24.2          |                 |
|                       | SD      | 13.8    | 8.1            | 6.9     |                     | 1.5           |                 |
| 119                   | average | 81.2    | 281.5          | 22.1    |                     | 21.5          |                 |
|                       | SD      | 13.8    | 87.0           | 9.3     |                     | 1.5           |                 |

Note: Due to analytical interferences, migration of methylstearate and of phenylcyclohexane from GPPS in 50% ethanol at 40 °C can not be measured.

Relative migration - Results in %. Average values

| Migration time [days] | Toluene | Chloro-benzene | Styrene | Phenyl-cyclo-hexane | Benzo-phenone | Methyl-stearate |
|-----------------------|---------|----------------|---------|---------------------|---------------|-----------------|
| 0.2                   | 0.0     | 0.0            | 0.0     |                     | 0.6           |                 |
| 0.4                   | 0.0     | 0.0            | 0.0     |                     | 0.7           |                 |
| 1                     | 0.0     | 0.0            | 0.0     |                     | 0.6           |                 |
| 2                     | 0.2     | 0.0            | 0.0     |                     | 0.6           |                 |
| 3                     | 0.2     | 0.0            | 0.0     |                     | 0.6           |                 |
| 7                     | 2.5     | 0.5            | 0.0     |                     | 0.6           |                 |
| 14                    | 4.1     | 1.7            | 0.0     |                     | 0.6           |                 |
| 21                    | 4.1     | 2.7            | 0.0     |                     | 0.6           |                 |
| 28                    | 6.0     | 6.5            | 0.9     |                     | 0.6           |                 |
| 35                    | 10.3    | 9.5            | 2.7     |                     | 0.8           |                 |
| 42                    | 11.2    | 10.1           | 3.6     |                     | 0.7           |                 |
| 49                    | 10.9    | 12.5           | 5.9     |                     | 0.6           |                 |
| 59                    | 8.3     | 6.7            | 9.7     |                     | 1.7           |                 |
| 76                    | 13.0    | 17.8           | 3.3     |                     | 1.7           |                 |
| 87                    | 12.6    | 14.9           | 3.0     |                     | 1.7           |                 |
| 98                    | 9.9     | 13.5           | 4.9     |                     | 1.8           |                 |
| 108                   | 13.4    | 11.2           | 4.1     |                     | 1.9           |                 |
| 119                   | 9.5     | 27.2           | 3.1     |                     | 1.7           |                 |

Migration of oligomers from GPPS into 50% ethanol at 40 °C was not detectable.

Weight increase - Results in %. Average values and standard deviation (N=3)

| Time contact [days] | Weight increase [%] | SD   |
|---------------------|---------------------|------|
| 0.16                | 0.3                 | 0.11 |
| 0.33                | 0.3                 | 0.09 |
| 1                   | 0.6                 | 0.07 |
| 2                   | 0.8                 | 0.05 |
| 5                   | 1.0                 | 0.09 |
| 8                   | 1.1                 | 0.13 |
| 12                  | 1.1                 | 0.05 |
| 15                  | 1.1                 | 0.04 |
| 19                  | 1.2                 | 0.04 |
| 22                  | 1.2                 | 0.24 |
| 26                  | 1.2                 | 0.22 |
| 44                  | 1.2                 | 0.23 |
| 48                  | 1.2                 | 0.32 |
| 57                  | 1.2                 | 0.31 |
| 72                  | 1.2                 | 0.30 |
| 100                 | 1.2                 | 0.34 |
| 127                 | 1.2                 | 0.34 |

## 9 Weight increase in 50% ethanol at 20 °C

The migration remains below the detection limits.

Weight increase - Results in %. Average values and standard deviation (N=3)

| Time contact<br>[days] | Weight increase<br>[%] | SD   |
|------------------------|------------------------|------|
| 1                      | 0.5                    | 0.14 |
| 2                      | 0.6                    | 0.12 |
| 5                      | 0.6                    | 0.07 |
| 8                      | 0.7                    | 0.04 |
| 12                     | 0.7                    | 0.01 |
| 15                     | 0.8                    | 0.01 |
| 19                     | 0.9                    | 0.01 |
| 23                     | 0.9                    | 0.01 |
| 26                     | 0.9                    | 0.11 |
| 44                     | 1.0                    | 0.10 |
| 48                     | 1.0                    | 0.09 |
| 57                     | 1.0                    | 0.06 |
| 72                     | 1.1                    | 0.05 |
| 100                    | 1.1                    | 0.04 |

## 10 Weight increase in 20% ethanol at 60. 40 and 20 °C

Weight increase at 60 °C - Results in %. Average values and standard deviation (N=3)

| Time contact<br>[days] | Weight increase<br>[%] | SD   |
|------------------------|------------------------|------|
| 2                      | 0.6                    | 0.02 |
| 5                      | 0.6                    | 0.02 |
| 11                     | 0.6                    | 0.02 |
| 16                     | 0.6                    | 0.04 |
| 19                     | 0.5                    | 0.04 |
| 45                     | 0.5                    | 0.04 |
| 60                     | 0.5                    | 0.04 |
| 89                     | 0.5                    | 0.04 |
| 138                    | 0.6                    | 0.04 |

Weight increase at 40 °C - Results in %. Average values and standard deviation (N=3)

| Time contact<br>[days] | Weight increase<br>[%] | SD   |
|------------------------|------------------------|------|
| 2                      | 0.3                    | 0.01 |
| 5                      | 0.4                    | 0.04 |
| 11                     | 0.5                    | 0.05 |
| 16                     | 0.5                    | 0.01 |
| 19                     | 0.5                    | 0.04 |
| 45                     | 0.5                    | 0.05 |
| 60                     | 0.5                    | 0.01 |
| 89                     | 0.5                    | 0.01 |
| 138                    | 0.5                    | 0.01 |

Weight increase at 20 °C - Results in %. Average values and standard deviation (N=3)

| Time contact<br>[days] | Weight increase<br>[%] | SD   |
|------------------------|------------------------|------|
| 2                      | 0.1                    | 0.05 |
| 5                      | 0.2                    | 0.05 |
| 11                     | 0.2                    | 0.04 |
| 16                     | 0.3                    | 0.02 |
| 19                     | 0.3                    | 0.03 |
| 45                     | 0.4                    | 0.01 |
| 60                     | 0.4                    | 0.01 |
| 89                     | 0.4                    | 0.02 |
| 138                    | 0.4                    | 0.02 |

❖ HIPS

## 11 Migration and weight increase in isooctane at 60 °C

Migration Kinetics - Results in  $\mu\text{g}/\text{dm}^2$ . Average values and standard deviation (N=3)

| Migration time [days] |         | Toluene | Chloro-benzene | Styrene | Phenyl-cyclo-hexane | Benzo-phenone | Methyl-stearate |
|-----------------------|---------|---------|----------------|---------|---------------------|---------------|-----------------|
| 0.21                  | average | 1076.0  | 1141.6         | 549.8   | 907.0               | 1105.8        | 1461.4          |
|                       | SD      | 20.7    | 26.2           | 14.5    | 471.6               | 75.6          | 44.2            |
| 0.38                  | average | 1095.2  | 1163.4         | 564.1   | 1189.5              | 1234.3        | 1614.2          |
|                       | SD      | 24.6    | 27.6           | 16.4    | 60.3                | 99.3          | 61.2            |
| 1                     | average | 1100.0  | 1153.9         | 560.9   | 1232.6              | 1337.5        | 1724.7          |
|                       | SD      | 22.4    | 19.7           | 9.4     | 31.7                | 63.9          | 59.2            |
| 2                     | average | 1122.4  | 1182.9         | 576.0   | 1314.2              | 1428.1        | 1796.5          |
|                       | SD      | 15.9    | 12.2           | 7.5     | 20.5                | 39.1          | 58.2            |
| 3                     | average | 1137.1  | 1194.9         | 583.8   | 1335.5              | 1448.8        | 1801.4          |
|                       | SD      | 29.32   | 15.17          | 6.28    | 20.26               | 23.06         | 33.26           |
| 7                     | average | 1126.58 | 1172.59        | 571.92  | 1318.23             | 1485.59       | 1783.85         |
|                       | SD      | 21.21   | 11.50          | 5.13    | 19.71               | 15.66         | 26.15           |
| 14                    | average | 1121.75 | 1179.97        | 570.89  | 1303.31             | 1477.29       | 1787.78         |
|                       | SD      | 14.93   | 16.76          | 7.75    | 16.96               | 14.02         | 19.18           |
| 22                    | average | 1165.35 | 1035.29        | 504.21  | 1177.45             | 1400.02       | 1747.04         |
|                       | SD      | 43.80   | 26.96          | 3.41    | 10.89               | 22.25         | 40.71           |
| 29                    | average | 1167.31 | 1202.28        | 581.66  | 1306.31             | 1494.30       | 1726.06         |
|                       | SD      | 11.30   | 11.53          | 3.50    | 16.83               | 19.21         | 77.13           |
| 35                    | average | 1180.28 | 1230.66        | 602.96  | 1370.85             | 1577.38       | 1819.77         |
|                       | SD      | 15.65   | 6.80           | 3.37    | 14.29               | 18.86         | 84.23           |
| 43                    | average | 1152.37 | 1217.05        | 590.82  | 1324.44             | 1455.87       | 1449.62         |
|                       | SD      | 18.23   | 19.92          | 7.76    | 24.15               | 90.97         | 291.23          |
| 49                    | average | 1134.72 | 1205.23        | 600.22  | 1333.66             | 1393.66       | 1440.42         |
|                       | SD      | 25.94   | 50.34          | 58.51   | 90.04               | 94.67         | 131.52          |

Relative migration - Results in %. Average values

| Migration time [days] | Toluene | Chloro-benzene | Styrene | Phenyl-cyclo-hexane | Benzo-phenone | Methyl-stearate |
|-----------------------|---------|----------------|---------|---------------------|---------------|-----------------|
| 0.21                  | 71.2    | 70.2           | 76.5    | 37.3                | 55.7          | 62.6            |
| 0.38                  | 72.5    | 71.5           | 78.5    | 48.9                | 62.2          | 69.1            |
| 1                     | 72.8    | 71.0           | 78.1    | 50.6                | 67.4          | 73.9            |
| 2                     | 74.3    | 72.7           | 80.2    | 54.0                | 72.0          | 77.0            |
| 3                     | 75.3    | 73.5           | 81.3    | 54.9                | 73.0          | 77.2            |
| 7                     | 74.6    | 72.1           | 79.6    | 54.2                | 74.9          | 76.4            |
| 14                    | 74.3    | 72.6           | 79.5    | 53.6                | 74.5          | 76.6            |
| 22                    | 77.1    | 63.7           | 70.2    | 48.4                | 70.6          | 74.8            |

|    |      |      |      |      |      |      |
|----|------|------|------|------|------|------|
| 29 | 77.3 | 73.9 | 81.0 | 53.7 | 75.3 | 73.9 |
| 35 | 78.1 | 75.7 | 83.9 | 56.3 | 79.5 | 77.9 |
| 43 | 76.3 | 74.8 | 82.2 | 54.4 | 73.4 | 62.1 |
| 49 | 75.1 | 74.1 | 83.6 | 54.8 | 70.3 | 61.7 |

#### Migration Kinetics - Results in $\mu\text{g}/\text{dm}^2$ . Average values

| Migration time [days] | Oligo-1 | Oligo-2 | Oligo-3 | Oligo-4 | Oligo-5 | Oligo-6 | Oligo-7 | Oligo-8 |
|-----------------------|---------|---------|---------|---------|---------|---------|---------|---------|
| 0.21                  | 119.3   | 1549.5  | 1913.3  | 4099.4  | 8384.4  | 2375.1  | 1007.4  | 308.5   |
| 0.38                  | 134.5   | 1761.6  | 2155.1  | 4534.0  | 9342.0  | 2666.4  | 1135.7  | 353.4   |
| 1                     | 143.7   | 1942.3  | 2617.6  | 5351.5  | 11226.9 | 3227.7  | 1378.3  | 428.6   |
| 2                     | 153.4   | 2070.4  | 3075.4  | 6362.7  | 13259.7 | 3788.8  | 1610.9  | 498.3   |
| 3                     | 154.2   | 2087.8  | 3256.4  | 6873.8  | 14117.9 | 3277.7  | 1728.2  | 527.5   |
| 7                     | 140.5   | 1891.9  | 3157.6  | 6904.2  | 13810.3 | 3865.5  | 1657.4  | 489.0   |
| 14                    | 143.3   | 1916.0  | 3297.5  | 7247.6  | 14381.9 | 4003.7  | 1720.1  | 505.1   |
| 22                    | 138.5   | 1909.1  | 3498.2  | 7808.1  | 15501.2 | 4297.9  | 1859.8  | 541.8   |
| 29                    | 141.7   | 1863.2  | 3198.2  | 6993.3  | 13865.8 | 3087.1  | 1670.3  | 497.0   |
| 35                    | 141.6   | 1856.2  | 3136.7  | 6865.9  | 13585.7 | 3774.8  | 1640.8  | 492.3   |
| 43                    | 145.1   | 1894.1  | 3240.7  | 7170.5  | 14194.6 | 3932.1  | 1714.0  | 509.9   |
| 49                    | 152.0   | 1998.6  | 3296.4  | 7264.9  | 14495.1 | 4036.5  | 1670.8  | 499.3   |

#### Relative migration - Results in %. Average values

| Migration time [days] | Oligo-1 | Oligo-2 | Oligo-3 | Oligo-4 | Oligo-5 | Oligo-6 | Oligo-7 | Oligo-8 |
|-----------------------|---------|---------|---------|---------|---------|---------|---------|---------|
| 0.21                  | 44.9    | 48.6    | 22.4    | 30.7    | 31.5    | 32.6    | 31.3    | 32.5    |
| 0.38                  | 50.6    | 55.3    | 25.2    | 34.0    | 35.1    | 36.6    | 35.3    | 37.3    |
| 1                     | 54.1    | 61.0    | 30.6    | 40.1    | 42.2    | 44.2    | 42.9    | 45.2    |
| 2                     | 57.8    | 65.0    | 35.9    | 47.7    | 49.8    | 51.9    | 50.1    | 52.6    |
| 3                     | 58.1    | 65.5    | 38.0    | 51.5    | 53.1    | 44.9    | 53.7    | 55.6    |
| 7                     | 52.9    | 59.4    | 36.9    | 51.7    | 51.9    | 53.0    | 51.5    | 51.6    |
| 14                    | 54.0    | 60.1    | 38.5    | 54.3    | 54.0    | 54.9    | 53.5    | 53.3    |
| 22                    | 52.2    | 59.9    | 40.9    | 58.5    | 58.3    | 58.9    | 57.8    | 57.2    |
| 29                    | 53.4    | 58.5    | 37.4    | 52.4    | 52.1    | 42.3    | 51.9    | 52.4    |
| 35                    | 53.3    | 58.3    | 36.6    | 51.4    | 51.1    | 51.7    | 51.0    | 51.9    |
| 43                    | 54.6    | 59.4    | 37.9    | 53.7    | 53.3    | 53.9    | 53.3    | 53.8    |
| 49                    | 57.2    | 62.7    | 38.5    | 54.4    | 54.5    | 55.3    | 51.9    | 52.7    |

Weight increase - Results in %. Average values and standard deviation (N=3)

| Time contact<br>[days] | Weight increase<br>[%] | SD   |
|------------------------|------------------------|------|
| 0.2                    | 16.7                   | 0.03 |
| 0.3                    | 17.3                   | 0.18 |
| 1                      | 20.9                   | 0.44 |
| 2                      | 22.1                   | 0.30 |
| 5                      | 26.3                   | 1.43 |
| 12                     | 31.8                   | 1.83 |
| 16                     | 33.8                   | 0.41 |
| 30                     | 36.0                   | 0.67 |
| 44                     | 38.3                   | 0.71 |
| 64                     | 42.8                   | 0.21 |
| 92                     | 49.9                   | 1.91 |
| 126                    | 58.1                   | 2.09 |
| 159                    | 63.4                   | 0.20 |
| 201                    | 68.2                   | 2.60 |



## 12 Migration and weight increase in isooctane at 40 °C

Migration Kinetics - Results in  $\mu\text{g}/\text{dm}^2$ . Average values and standard deviation (N=3)

| Migration time [days] |         | Toluene | Chloro-benzene | Styrene | Phenyl-cyclo-hexane | Benzo-phenone | Methyl-stearate |
|-----------------------|---------|---------|----------------|---------|---------------------|---------------|-----------------|
| 1                     | average | 1052.7  | 1064.0         | 526.0   | 655.6               | 710.8         | 922.7           |
|                       | SD      | 508.3   | 18.7           | 13.0    | 11.0                | 8.8           | 9.3             |
| 2                     | average | 1279.54 | 1083.19        | 558.97  | 817.99              | 897.11        | 1119.46         |
|                       | SD      | 30.91   | 22.90          | 18.43   | 31.87               | 50.94         | 62.73           |
| 3                     | average | 1300.51 | 1093.69        | 560.81  | 882.42              | 966.64        | 1219.50         |
|                       | SD      | 33.92   | 31.36          | 28.63   | 19.53               | 15.58         | 20.24           |
| 7                     | average | 1333.40 | 1108.12        | 588.64  | 1049.93             | 1170.68       | 1428.19         |
|                       | SD      | 27.84   | 27.17          | 19.11   | 18.01               | 11.30         | 15.32           |
| 14                    | average | 1325.85 | 1116.16        | 575.47  | 1179.41             | 1308.78       | 1609.87         |
|                       | SD      | 18.28   | 20.93          | 29.03   | 33.41               | 33.00         | 41.04           |
| 22                    | average | 1458.15 | 972.96         | 541.10  | 1094.57             | 1276.57       | 1688.49         |
|                       | SD      | 58.06   | 14.98          | 9.21    | 21.75               | 18.84         | 31.26           |
| 29                    | average | 1412.59 | 1155.20        | 612.93  | 1246.33             | 1391.45       | 1724.25         |
|                       | SD      | 83.00   | 24.45          | 14.79   | 26.30               | 23.21         | 27.62           |
| 35                    | average | 1357.98 | 1180.79        | 635.50  | 1307.97             | 1469.28       | 1808.45         |
|                       | SD      | 16.85   | 20.15          | 10.88   | 29.64               | 22.37         | 26.72           |
| 43                    | average | 1334.60 | 1138.80        | 601.36  | 1255.55             | 1385.92       | 1654.69         |
|                       | SD      | 15.67   | 15.88          | 26.01   | 9.86                | 26.31         | 25.41           |
| 49                    | average | 1315.44 | 1145.69        | 597.12  | 1267.78             | 1391.03       | 1597.35         |
|                       | SD      | 28.30   | 19.37          | 37.06   | 25.92               | 22.04         | 46.02           |

Relative migration - Results in %. Average values

| Migration time [days] | Toluene | Chloro-benzene | Styrene | Phenyl-cyclo-hexane | Benzo-phenone | Methyl-stearate |
|-----------------------|---------|----------------|---------|---------------------|---------------|-----------------|
| 1                     | 69.7    | 65.4           | 73.2    | 26.9                | 35.8          | 39.5            |
| 2                     | 84.7    | 66.6           | 77.8    | 33.6                | 45.2          | 48.0            |
| 3                     | 86.1    | 67.3           | 78.1    | 36.3                | 48.7          | 52.2            |
| 7                     | 88.3    | 68.1           | 81.9    | 43.1                | 59.0          | 61.2            |
| 14                    | 87.8    | 68.6           | 80.1    | 48.5                | 66.0          | 69.0            |
| 22                    | 96.5    | 59.8           | 75.3    | 45.0                | 64.4          | 72.3            |
| 29                    | 93.5    | 71.0           | 85.3    | 51.2                | 70.1          | 73.9            |
| 35                    | 89.9    | 72.6           | 88.5    | 53.7                | 74.1          | 77.5            |
| 43                    | 88.4    | 70.0           | 83.7    | 51.6                | 69.9          | 70.9            |
| 49                    | 87.1    | 70.5           | 83.1    | 52.1                | 70.1          | 68.4            |

# Migration Kinetics - Results in $\mu\text{g}/\text{dm}^2$ . Average values

| Migration time [days] | Oligo-1 | Oligo-2 | Oligo-3 | Oligo-4 | Oligo-5 | Oligo-6 | Oligo-7 | Oligo-8 |
|-----------------------|---------|---------|---------|---------|---------|---------|---------|---------|
| 1                     | 80.0    | 1029.8  | 1648.3  | 3519.5  | 7046.5  | 2000.8  | 856.3   | 256.7   |
| 2                     | 96.2    | 1247.0  | 2054.4  | 4445.0  | 8873.5  | 2506.7  | 1075.8  | 318.1   |
| 3                     | 108.9   | 1414.1  | 2390.1  | 5183.9  | 10331.0 | 2890.7  | 1250.7  | 370.6   |
| 7                     | 117.5   | 1533.0  | 2624.3  | 5707.4  | 11312.1 | 3159.0  | 1357.5  | 400.9   |
| 14                    | 132.1   | 1723.4  | 2988.2  | 6489.6  | 12845.3 | 3572.2  | 1503.7  | 448.3   |
| 22                    | 132.3   | 1813.9  | 3349.6  | 7402.4  | 14668.9 | 4083.6  | 1759.1  | 520.8   |
| 29                    | 135.2   | 1784.0  | 1554.0  | 6602.0  | 13081.8 | 3610.1  | 1339.6  | 463.4   |
| 35                    | 136.6   | 1780.6  | 540.7   | 6474.7  | 12801.8 | 3551.0  | 1549.2  | 460.7   |
| 43                    | 144.4   | 1810.4  | 3118.8  | 6824.1  | 13499.5 | 3742.4  | 1621.4  | 481.5   |
| 49                    | 146.0   | 1819.3  | 3121.2  | 6812.4  | 13475.2 | 3742.0  | 1625.5  | 484.5   |

# Relative migration - Results in %. Average values

| Migration time [days] | Oligo-1 | Oligo-2 | Oligo-3 | Oligo-4 | Oligo-5 | Oligo-6 | Oligo-7 | Oligo-8 |
|-----------------------|---------|---------|---------|---------|---------|---------|---------|---------|
| 1                     | 30.1    | 32.3    | 19.3    | 26.4    | 26.5    | 27.4    | 26.6    | 27.1    |
| 2                     | 36.2    | 39.1    | 24.0    | 33.3    | 33.3    | 34.4    | 33.4    | 33.6    |
| 3                     | 41.0    | 44.4    | 27.9    | 38.8    | 38.8    | 39.6    | 38.9    | 39.1    |
| 7                     | 44.3    | 48.1    | 30.7    | 42.8    | 42.5    | 43.3    | 42.2    | 42.3    |
| 14                    | 49.7    | 54.1    | 34.9    | 48.6    | 48.3    | 49.0    | 46.8    | 47.3    |
| 22                    | 49.8    | 56.9    | 39.1    | 55.5    | 55.1    | 56.0    | 54.7    | 54.9    |
| 29                    | 50.9    | 56.0    | 35.0    | 49.5    | 49.2    | 49.5    | 41.7    | 48.9    |
| 35                    | 51.4    | 55.9    | 35.0    | 48.5    | 48.1    | 48.7    | 48.2    | 48.6    |
| 43                    | 54.4    | 56.8    | 36.4    | 51.1    | 50.7    | 51.3    | 50.4    | 50.8    |
| 49                    | 55.0    | 57.1    | 36.5    | 51.0    | 50.6    | 51.3    | 50.5    | 51.1    |

Weight increase- Results in %. Average values and standard deviation (N=3)

| Time contact<br>[days] | Weight increase<br>[%] | SD   |
|------------------------|------------------------|------|
| 0.2                    | 3.1                    | 0.22 |
| 0.3                    | 2.4                    | 0.57 |
| 1                      | 5.6                    | 0.55 |
| 2                      | 6.9                    | 0.40 |
| 5                      | 8.7                    | 1.37 |
| 12                     | 12.4                   | 1.36 |
| 16                     | 13.2                   | 0.33 |
| 30                     | 14.0                   | 0.73 |
| 44                     | 14.4                   | 0.73 |
| 64                     | 14.4                   | 0.43 |
| 92                     | 14.3                   | 1.17 |
| 126                    | 14.2                   | 0.77 |
| 159                    | 14.5                   | 0.61 |

### 13 Migration and weight increase in isooctane at 20 °C

Migration Kinetics - Results in  $\mu\text{g}/\text{dm}^2$ . Average values and standard deviation (N=3)

| Migration time [days] |         | Toluene | Chloro-benzene | Styrene | Phenyl-cyclo-hexane | Benzo-phenone | Methyl-stearate |
|-----------------------|---------|---------|----------------|---------|---------------------|---------------|-----------------|
| 1                     | average | 763.48  | 743.30         | 298.00  | 161.43              | 187.26        | 277.16          |
|                       | SD      | 207.58  | 99.34          | 58.21   | 33.41               | 27.60         | 41.57           |
| 2                     | average | 887.18  | 852.55         | 355.62  | 233.84              | 269.79        | 346.42          |
|                       | SD      | 106.14  | 9.01           | 18.41   | 4.32                | 3.46          | 3.46            |
| 3                     | average | 887.03  | 876.01         | 377.05  | 270.92              | 313.61        | 382.03          |
|                       | SD      | 110.28  | 5.52           | 24.69   | 2.69                | 3.88          | 3.07            |
| 7                     | average | 955.06  | 919.15         | 414.62  | 363.22              | 422.13        | 476.65          |
|                       | SD      | 104.47  | 9.70           | 18.40   | 3.11                | 6.67          | 6.09            |
| 14                    | average | 972.56  | 938.34         | 444.18  | 466.19              | 534.10        | 591.33          |
|                       | SD      | 145.93  | 49.60          | 32.57   | 19.86               | 29.93         | 28.82           |
| 22                    | average | 1144.53 | 901.76         | 428.83  | 476.76              | 554.97        | 685.64          |
|                       | SD      | 129.33  | 55.21          | 26.40   | 12.90               | 12.70         | 20.63           |
| 29                    | average | 1052.81 | 1009.37        | 472.48  | 567.09              | 636.53        | 740.26          |
|                       | SD      | 103.23  | 8.98           | 4.46    | 9.03                | 9.50          | 11.17           |
| 35                    | average | 1073.63 | 1045.79        | 503.07  | 624.89              | 695.42        | 801.07          |
|                       | SD      | 109.49  | 6.44           | 22.46   | 12.86               | 10.60         | 16.15           |
| 43                    | average | 1060.96 | 1006.91        | 478.66  | 640.22              | 672.75        | 738.30          |
|                       | SD      | 92.28   | 10.09          | 5.00    | 11.60               | 15.86         | 17.91           |
| 49                    | average | 1053.87 | 1036.60        | 493.67  | 670.06              | 722.79        | 773.61          |
|                       | SD      | 114.44  | 5.38           | 3.48    | 8.99                | 9.35          | 21.50           |
| 56                    | average | 1097.16 | 1092.87        | 517.27  | 728.38              | 742.84        | 603.40          |
|                       | SD      | 102.62  | 75.68          | 38.37   | 57.53               | 39.56         | 80.96           |
| 63                    | average | 1075.44 | 1042.51        | 496.77  | 707.35              | 752.51        | 761.54          |
|                       | SD      | 106.45  | 3.67           | 4.28    | 8.31                | 7.07          | 10.33           |
| 70                    | average | 1076.80 | 1035.78        | 501.69  | 722.06              | 733.85        | 476.46          |
|                       | SD      | 103.74  | 26.27          | 26.29   | 21.58               | 50.55         | 102.79          |
| 77                    | average | 1071.22 | 1027.09        | 491.50  | 742.67              | 746.71        | 677.34          |
|                       | SD      | 95.81   | 4.90           | 4.09    | 15.81               | 10.16         | 30.25           |
| 84                    | average | 1084.79 | 1084.34        | 528.73  | 812.29              | 803.94        | 762.38          |
|                       | SD      | 98.53   | 84.20          | 39.83   | 77.23               | 56.28         | 67.16           |
| 91                    | average | 1073.48 | 1046.61        | 513.49  | 800.48              | 818.45        | 888.29          |
|                       | SD      | 106.66  | 9.14           | 21.53   | 20.02               | 13.07         | 14.49           |
| 98                    | average | 1062.77 | 1025.61        | 487.71  | 752.93              | 806.01        | 849.96          |
|                       | SD      | 100.04  | 12.99          | 5.35    | 22.12               | 22.52         | 66.97           |
| 105                   | average | 1074.23 | 1031.52        | 493.56  | 769.61              | 820.25        | 945.78          |
|                       | SD      | 93.92   | 19.11          | 8.20    | 21.60               | 25.57         | 26.41           |
| 115                   | average | 1101.54 | 1048.58        | 501.35  | 790.74              | 846.79        | 924.81          |
|                       | SD      | 107.20  | 21.53          | 10.30   | 32.14               | 31.19         | 82.88           |

Relative migration - Results in %. Average values

| Migration time [days] | Toluene | Chloro-benzene | Styrene | Phenyl-cyclo-hexane | Benzo-phenone | Methyl-stearate |
|-----------------------|---------|----------------|---------|---------------------|---------------|-----------------|
| 1                     | 50.5    | 45.7           | 41.5    | 6.6                 | 9.4           | 11.9            |
| 2                     | 58.7    | 52.4           | 49.5    | 9.6                 | 13.6          | 14.8            |
| 3                     | 58.7    | 53.9           | 52.5    | 11.1                | 15.8          | 16.4            |
| 7                     | 63.2    | 56.5           | 57.7    | 14.9                | 21.3          | 20.4            |
| 14                    | 64.4    | 57.7           | 61.8    | 19.2                | 26.9          | 25.3            |
| 22                    | 75.8    | 55.5           | 59.7    | 19.6                | 28.0          | 29.4            |
| 29                    | 69.7    | 62.1           | 65.8    | 23.3                | 32.1          | 31.7            |
| 35                    | 71.1    | 64.3           | 70.0    | 25.7                | 35.1          | 34.3            |
| 43                    | 70.2    | 61.9           | 66.6    | 26.3                | 33.9          | 31.6            |
| 49                    | 69.8    | 63.7           | 68.7    | 27.5                | 36.4          | 33.1            |
| 56                    | 72.6    | 67.2           | 72.0    | 29.9                | 37.4          | 25.8            |
| 63                    | 71.2    | 64.1           | 69.2    | 29.1                | 37.9          | 32.6            |
| 70                    | 71.3    | 63.7           | 69.8    | 29.7                | 37.0          | 20.4            |
| 77                    | 70.9    | 63.2           | 68.4    | 30.5                | 37.6          | 29.0            |
| 84                    | 71.8    | 66.7           | 73.6    | 33.4                | 40.5          | 32.7            |
| 91                    | 71.1    | 64.4           | 71.5    | 32.9                | 41.3          | 38.0            |
| 98                    | 70.4    | 63.1           | 67.9    | 30.9                | 40.6          | 36.4            |
| 105                   | 71.1    | 63.4           | 68.7    | 31.6                | 41.4          | 40.5            |
| 115                   | 72.9    | 64.5           | 69.8    | 32.5                | 42.7          | 39.6            |

Migration Kinetics - Results in  $\mu\text{g}/\text{dm}^2$ . Average values

| Migration time [days] | Oligo-1 | Oligo-2 | Oligo-3 | Oligo-4 | Oligo-5 | Oligo-6 | Oligo-7 | Oligo-8 |
|-----------------------|---------|---------|---------|---------|---------|---------|---------|---------|
| 1                     | 22.6    | 218.1   | 588.6   | 1155.0  | 2360.9  | 688.7   | 280.6   | 87.1    |
| 2                     | 27.3    | 296.4   | 646.9   | 1301.1  | 2671.3  | 775.5   | 312.5   | 98.2    |
| 3                     | 31.5    | 334.5   | 643.5   | 1293.7  | 2657.6  | 776.9   | 323.2   | 98.7    |
| 7                     | 36.6    | 420.3   | 635.6   | 1257.2  | 2593.2  | 752.7   | 317.0   | 97.7    |
| 14                    | 48.2    | 552.1   | 683.9   | 1400.9  | 2914.0  | 848.5   | 361.6   | 112.0   |
| 22                    | 52.5    | 657.4   | 853.1   | 1670.4  | 3505.8  | 1021.9  | 436.1   | 134.9   |
| 29                    | 62.8    | 712.1   | 874.0   | 1652.7  | 3482.8  | 1008.5  | 435.5   | 136.3   |
| 35                    | 63.9    | 745.4   | 881.9   | 1659.0  | 3501.9  | 1019.7  | 443.6   | 140.2   |
| 43                    | 68.6    | 791.2   | 936.6   | 1772.9  | 3771.6  | 1091.3  | 479.9   | 149.0   |
| 49                    | 74.0    | 817.0   | 974.0   | 1827.4  | 3895.0  | 1130.0  | 498.2   | 155.7   |
| 56                    | 68.9    | 885.1   | 983.8   | 1923.3  | 4189.6  | 1205.4  | 536.7   | 170.5   |
| 63                    | 72.5    | 901.9   | 1024.8  | 2031.7  | 4352.6  | 1251.7  | 563.1   | 176.0   |
| 70                    | 76.5    | 987.6   | 1157.0  | 2343.4  | 5047.4  | 1453.5  | 656.3   | 207.2   |
| 77                    | 79.0    | 1003.5  | 1186.0  | 2369.4  | 5082.3  | 1454.4  | 657.3   | 205.8   |
| 84                    | 75.4    | 998.4   | 1124.6  | 2240.9  | 4823.7  | 1387.4  | 622.3   | 194.9   |
| 91                    | 78.2    | 1000.4  | 1172.4  | 2334.2  | 4999.9  | 1440.7  | 637.2   | 197.9   |

|     |      |        |        |        |        |        |       |       |
|-----|------|--------|--------|--------|--------|--------|-------|-------|
| 98  | 79.1 | 999.2  | 1253.2 | 2515.3 | 5399.1 | 1554.5 | 694.0 | 218.8 |
| 105 | 81.4 | 1030.8 | 1321.4 | 2629.2 | 5643.3 | 1630.2 | 723.7 | 229.6 |
| 115 | 84.5 | 1074.3 | 1373.1 | 2729.6 | 5885.3 | 1689.9 | 764.2 | 243.4 |

Relative migration - Results in %. Average values

| Migration time [days] | Oligo-1 | Oligo-2 | Oligo-3 | Oligo-4 | Oligo-5 | Oligo-6 | Oligo-7 | Oligo-8 |
|-----------------------|---------|---------|---------|---------|---------|---------|---------|---------|
| 1                     | 8.5     | 6.8     | 6.9     | 8.7     | 8.9     | 9.4     | 8.7     | 9.2     |
| 2                     | 10.3    | 9.3     | 7.6     | 9.7     | 10.0    | 10.6    | 9.7     | 10.4    |
| 3                     | 11.9    | 10.5    | 7.5     | 9.7     | 10.0    | 10.7    | 10.0    | 10.4    |
| 7                     | 13.8    | 13.2    | 7.4     | 9.4     | 9.7     | 10.3    | 9.9     | 10.3    |
| 14                    | 18.1    | 17.3    | 8.0     | 10.5    | 11.0    | 11.6    | 11.2    | 11.8    |
| 22                    | 19.8    | 20.6    | 10.0    | 12.5    | 13.2    | 14.0    | 13.6    | 14.2    |
| 29                    | 23.6    | 22.4    | 10.2    | 12.4    | 13.1    | 13.8    | 13.5    | 14.4    |
| 35                    | 24.0    | 23.4    | 10.3    | 12.4    | 13.2    | 14.0    | 13.8    | 14.8    |
| 43                    | 25.8    | 24.8    | 10.9    | 13.3    | 14.2    | 15.0    | 14.9    | 15.7    |
| 49                    | 27.8    | 25.6    | 11.4    | 13.7    | 14.6    | 15.5    | 15.5    | 16.4    |
| 56                    | 25.9    | 27.8    | 11.5    | 14.4    | 15.7    | 16.5    | 16.7    | 18.0    |
| 63                    | 27.3    | 28.3    | 12.0    | 15.2    | 16.4    | 17.2    | 17.5    | 18.6    |
| 70                    | 28.8    | 31.0    | 13.5    | 17.6    | 19.0    | 19.9    | 20.4    | 21.9    |
| 77                    | 29.7    | 31.5    | 13.9    | 17.8    | 19.1    | 19.9    | 20.4    | 21.7    |
| 84                    | 28.4    | 31.3    | 13.1    | 16.8    | 18.1    | 19.0    | 19.3    | 20.6    |
| 91                    | 29.4    | 31.4    | 13.7    | 17.5    | 18.8    | 19.8    | 19.8    | 20.9    |
| 98                    | 29.8    | 31.4    | 14.6    | 18.8    | 20.3    | 21.3    | 21.6    | 23.1    |
| 105                   | 30.7    | 32.4    | 15.4    | 19.7    | 21.2    | 22.3    | 22.5    | 24.2    |
| 115                   | 31.8    | 33.7    | 16.0    | 20.5    | 22.1    | 23.2    | 23.8    | 25.7    |

Weight increase - Results in %. Average values and standard deviation (N=3)

| Time contact [days] | Weight increase [%] | SD   |
|---------------------|---------------------|------|
| 2                   | 1.6                 | 0.19 |
| 5                   | 2.3                 | 0.40 |
| 12                  | 2.7                 | 0.43 |
| 16                  | 2.9                 | 0.05 |
| 30                  | 3.5                 | 0.11 |
| 44                  | 4.0                 | 0.19 |
| 64                  | 4.4                 | 0.13 |
| 92                  | 5.0                 | 0.18 |
| 126                 | 5.6                 | 0.17 |
| 159                 | 6.2                 | 0.33 |
| 201                 | 7.0                 | 0.43 |
| 273                 | 7.6                 | 0.50 |

## 14 Migration and weight increase in 95% ethanol at 60 °C

Migration Kinetics - Results in  $\mu\text{g}/\text{dm}^2$ . Average values and standard deviation (N=3)

| Migration time [days] |         | Toluene | Chloro-benzene | Styrene | Phenyl-cyclo-hexane | Benzo-phenone | Methyl-stearate |
|-----------------------|---------|---------|----------------|---------|---------------------|---------------|-----------------|
| 0.33                  | average | 100.5   | 181.0          | 53.4    | 37.1                | 71.4          | 53.9            |
|                       | SD      | 14.2    | 28.7           | 6.2     | 1.5                 | 3.8           | 5.5             |
| 1                     | average | 313.6   | 426.9          | 163.3   | 53.7                | 118.2         | 76.6            |
|                       | SD      | 34.7    | 29.4           | 12.1    | 23.6                | 6.3           | 4.1             |
| 2                     | average | 675.2   | 729.2          | 285.7   | 96.1                | 173.5         | 99.5            |
|                       | SD      | 183.8   | 65.7           | 26.7    | 5.8                 | 9.4           | 6.6             |
| 3                     | average | 785.0   | 894.8          | 367.8   | 188.2               | 221.1         | 141.5           |
|                       | SD      | 33.6    | 55.1           | 17.2    | 07.2                | 10.2          | 7.2             |
| 7                     | average | 1164.1  | 1239.7         | 548.7   | 274.5               | 361.3         | 203.4           |
|                       | SD      | 34.8    | 28.4           | 12.3    | 09.8                | 15.1          | 11.8            |
| 14                    | average | 1306.4  | 1400.5         | 659.5   | 379.5               | 528.0         | 274.9           |
|                       | SD      | 27.3    | 20.6           | 08.3    | 17.7                | 27.7          | 18.0            |
| 22                    | average | 1392.9  | 1750.3         | 834.5   | 514.5               | 742.4         | 301.8           |
|                       | SD      | 150.3   | 137.8          | 25.1    | 27.5                | 31.3          | 16.5            |
| 29                    | average | 1307.0  | 1388.7         | 670.5   | 522.7               | 747.8         | 440.9           |
|                       | SD      | 20.9    | 29.5           | 12.3    | 30.6                | 42.4          | 33.2            |
| 35                    | average | 1390.0  | 1454.5         | 751.3   | 649.9               | 940.3         | 542.0           |
|                       | SD      | 24.9    | 34.5           | 05.8    | 41.5                | 66.3          | 52.8            |
| 43                    | average | 1251.9  | 1451.7         | 733.4   | 710.0               | 968.3         | 443.7           |
|                       | SD      | 38.9    | 30.6           | 14.2    | 31.1                | 61.4          | 72.6            |
| 49                    | average | 1293.8  | 1488.5         | 751.8   | 768.5               | 1073.5        | 495.2           |
|                       | SD      | 52.5    | 21.9           | 09.7    | 55.9                | 80.8          | 78.8            |
| 56                    | average | 1171.5  | 1420.3         | 728.9   | 798.1               | 1136.0        | 487.9           |
|                       | SD      | 46.4    | 45.5           | 09.9    | 48.9                | 56.9          | 43.5            |
| 63                    | average | 1200.0  | 1452.2         | 741.5   | 866.7               | 1200.0        | 496.7           |
|                       | SD      | 75.1    | 55.2           | 15.1    | 43.0                | 51.7          | 39.5            |
| 70                    | average | 1203.3  | 1348.0         | 748.9   | 935.6               | 1262.6        | 423.5           |
|                       | SD      | 44.6    | 116.2          | 17.7    | 69.0                | 71.2          | 43.4            |
| 77                    | average | 1181.0  | 1424.0         | 744.6   | 965.8               | 1289.9        | 444.1           |
|                       | SD      | 48.2    | 40.1           | 17.8    | 61.0                | 54.8          | 29.0            |
| 84                    | average | 1230.7  | 1357.9         | 743.0   | 1006.5              | 1422.3        | 710.1           |
|                       | SD      | 55.6    | 78.6           | 20.0    | 87.6                | 80.9          | 33.8            |
| 91                    | average | 1199.0  | 1410.4         | 708.5   | 989.2               | 1427.8        | 767.6           |
|                       | SD      | 56.9    | 22.1           | 12.1    | 36.5                | 39.2          | 42.1            |
| 98                    | average | 1075.1  | 1354.4         | 725.2   | 1111.8              | 1536.5        | 429.1           |
|                       | SD      | 99.1    | 57.9           | 36.5    | 74.9                | 69.7          | 241.8           |
| 105                   | average | 997.2   | 1272.0         | 647.6   | 1066.3              | 1497.4        | 644.1           |
|                       | SD      | 166.3   | 119.0          | 53.4    | 105.8               | 97.0          | 19.5            |
| 115                   | average | 1250.7  | 1407.3         | 735.0   | 1194.4              | 1591.4        | 891.8           |
|                       | SD      | 53.6    | 51.8           | 13.2    | 49.5                | 34.9          | 46.4            |

Relative migration - Results in %. Average values

| Migration time [days] | Toluene | Chloro-benzene | Styrene | Phenyl-cyclo-hexane | Benzo-phenone | Methyl-stearate |
|-----------------------|---------|----------------|---------|---------------------|---------------|-----------------|
| 0.33                  | 6.7     | 11.1           | 7.4     | 1.5                 | 3.6           | 2.3             |
| 1                     | 20.8    | 26.3           | 22.7    | 2.2                 | 6.0           | 3.3             |
| 2                     | 20.8    | 44.8           | 39.8    | 3.9                 | 8.7           | 4.3             |
| 3                     | 52.0    | 55.0           | 50.4    | 5.2                 | 11.1          | 5.5             |
| 7                     | 77.1    | 76.2           | 76.1    | 8.8                 | 18.2          | 8.4             |
| 14                    | 86.5    | 86.1           | 91.8    | 13.3                | 26.6          | 11.7            |
| 22                    | 92.2    | 83.0           | 88.8    | 19.1                | 37.5          | 13.0            |
| 29                    | 86.5    | 85.4           | 93.4    | 19.4                | 37.7          | 19.5            |
| 35                    | 92.0    | 89.4           | 104.8   | 24.8                | 47.5          | 24.2            |
| 43                    | 82.9    | 89.3           | 102.3   | 27.4                | 48.9          | 19.6            |
| 49                    | 85.7    | 91.5           | 104.9   | 29.9                | 54.2          | 22.0            |
| 56                    | 77.6    | 87.3           | 101.6   | 31.1                | 57.4          | 21.7            |
| 63                    | 79.4    | 89.3           | 103.4   | 34.1                | 60.6          | 22.1            |
| 70                    | 79.7    | 82.9           | 104.5   | 37.0                | 63.8          | 18.7            |
| 77                    | 78.2    | 87.6           | 103.9   | 38.3                | 65.2          | 19.6            |
| 84                    | 81.5    | 83.5           | 103.6   | 40.0                | 71.8          | 32.1            |
| 91                    | 79.4    | 86.7           | 98.7    | 39.3                | 72.1          | 34.8            |
| 98                    | 71.2    | 83.3           | 101.1   | 44.5                | 77.6          | 18.9            |
| 105                   | 66.0    | 78.2           | 90.1    | 42.6                | 75.6          | 29.0            |
| 115                   | 82.8    | 86.5           | 102.5   | 48.0                | 80.4          | 40.6            |

Migration Kinetics - Results in  $\mu\text{g}/\text{dm}^2$ . Average values

| Migration time [days] | Oligo-1 | Oligo-2 | Oligo-3 | Oligo-4 | Oligo-5 | Oligo-6 | Oligo-7 | Oligo-8 |
|-----------------------|---------|---------|---------|---------|---------|---------|---------|---------|
| 0.33                  | 4.48    | 27.29   | 49.55   | 30.06   | 68.18   | 20.98   | 8.90    | 3.39    |
| 1                     | 5.88    | 39.38   | 46.63   | 35.55   | 82.43   | 24.65   | 10.42   | 4.03    |
| 2                     | 8.74    | 55.15   | 43.89   | 39.76   | 94.07   | 27.24   | 11.23   | 5.08    |
| 3                     | 11.69   | 69.99   | 47.13   | 46.13   | 111.83  | 32.62   | 14.51   | 6.28    |
| 7                     | 15.58   | 113.44  | 53.05   | 58.82   | 139.11  | 41.96   | 19.19   | 7.11    |
| 14                    | 22.17   | 164.14  | 57.65   | 73.20   | 177.28  | 54.90   | 26.51   | 9.62    |
| 22                    | 24.71   | 202.94  | 54.36   | 90.53   | 218.33  | 65.91   | 31.93   | 12.13   |
| 29                    | 31.88   | 236.57  | 112.52  | 95.56   | 234.26  | 62.31   | 36.20   | 10.61   |
| 35                    | 36.37   | 259.20  | 105.18  | 96.78   | 239.01  | 72.28   | 39.81   | 2.32    |
| 43                    | 13.36   | 299.14  | 109.79  | 108.85  | 264.15  | 45.03   | 45.02   | 16.67   |
| 49                    | 45.83   | 326.16  | 115.99  | 114.99  | 283.28  | 3.93    | 41.71   | 16.63   |
| 56                    | 18.48   | 344.90  | 87.46   | 118.41  | 295.96  | 91.86   | 48.03   | 17.27   |
| 63                    | 24.05   | 369.47  | 86.65   | 123.12  | 305.07  | 94.00   | 24.06   | 18.75   |
| 70                    | 8.97    | 403.49  | 100.98  | 137.31  | 337.04  | 103.95  | 55.92   | 20.83   |
| 77                    | 14.30   | 423.06  | 98.99   | 143.96  | 354.98  | 108.94  | 57.34   | 20.96   |



|     |       |        |        |        |        |        |       |       |
|-----|-------|--------|--------|--------|--------|--------|-------|-------|
| 84  | 17.67 | 446.39 | 126.32 | 158.76 | 392.76 | 120.61 | 63.21 | 23.75 |
| 91  | 7.82  | 467.29 | 129.62 | 182.31 | 451.28 | 139.10 | 72.00 | 27.15 |
| 98  | 8.25  | 491.17 | 114.83 | 164.48 | 406.55 | 125.26 | 62.13 | 23.58 |
| 105 | 6.63  | 507.92 | 120.20 | 174.95 | 436.56 | 136.33 | 70.22 | 27.58 |
| 115 | 7.27  | 541.09 | 128.03 | 178.07 | 443.08 | 137.70 | 72.58 | 28.14 |

# Relative migration - Results in %. Average values

| Migration<br>time<br>[days] | Oligo-1 | Oligo-2 | Oligo-3 | Oligo-4 | Oligo-5 | Oligo-6 | Oligo-7 | Oligo-8 |
|-----------------------------|---------|---------|---------|---------|---------|---------|---------|---------|
| 0.33                        | 1.7     | 0.9     | 0.6     | 0.2     | 0.3     | 0.3     | 0.3     | 0.4     |
| 1                           | 2.2     | 1.2     | 0.5     | 0.3     | 0.3     | 0.3     | 0.3     | 0.4     |
| 2                           | 3.3     | 1.7     | 0.5     | 0.3     | 0.4     | 0.4     | 0.3     | 0.5     |
| 3                           | 4.4     | 2.2     | 0.6     | 0.3     | 0.4     | 0.4     | 0.5     | 0.7     |
| 7                           | 5.9     | 3.6     | 0.6     | 0.4     | 0.5     | 0.6     | 0.6     | 0.7     |
| 14                          | 8.3     | 5.2     | 0.7     | 0.5     | 0.7     | 0.8     | 0.8     | 1.0     |
| 22                          | 9.3     | 6.4     | 0.6     | 0.7     | 0.8     | 0.9     | 1.0     | 1.3     |
| 29                          | 12.0    | 7.4     | 1.3     | 0.7     | 0.9     | 0.9     | 1.1     | 1.1     |
| 35                          | 13.7    | 8.1     | 1.2     | 0.7     | 0.9     | 1.0     | 1.2     | 0.2     |
| 43                          | 5.0     | 9.4     | 1.3     | 0.8     | 1.0     | 0.6     | 1.4     | 1.8     |
| 49                          | 17.3    | 10.2    | 1.4     | 0.9     | 1.1     | 0.1     | 1.3     | 1.8     |
| 56                          | 7.0     | 10.8    | 1.0     | 0.9     | 1.1     | 1.3     | 1.5     | 1.8     |
| 63                          | 9.1     | 11.6    | 1.0     | 0.9     | 1.1     | 1.3     | 0.7     | 2.0     |
| 70                          | 3.4     | 12.7    | 1.2     | 1.0     | 1.3     | 1.4     | 1.7     | 2.2     |
| 77                          | 5.4     | 13.3    | 1.2     | 1.1     | 1.3     | 1.5     | 1.8     | 2.2     |
| 84                          | 6.7     | 14.0    | 1.5     | 1.2     | 1.5     | 1.7     | 2.0     | 2.5     |
| 91                          | 2.9     | 14.7    | 1.5     | 1.4     | 1.7     | 1.9     | 2.2     | 2.9     |
| 98                          | 3.1     | 15.4    | 1.3     | 1.2     | 1.5     | 1.7     | 1.9     | 2.5     |
| 105                         | 2.5     | 15.9    | 1.4     | 1.3     | 1.6     | 1.9     | 2.2     | 2.9     |
| 115                         | 2.7     | 17.0    | 1.5     | 1.3     | 1.7     | 1.9     | 2.3     | 3.0     |

Weight increase - Results in %. Average values and standard deviation (N=3)

| Time contact<br>[days] | Weight increase<br>[%] | SD   |
|------------------------|------------------------|------|
| 0.2                    | 1.6                    | 0.06 |
| 0.3                    | 1.9                    | 0.11 |
| 1                      | 3.2                    | 0.17 |
| 2                      | 3.3                    | 0.05 |
| 5                      | 3.2                    | 0.58 |
| 12                     | 3.2                    | 0.62 |
| 16                     | 3.2                    | 0.05 |
| 30                     | 3.3                    | 0.05 |
| 44                     | 3.7                    | 0.07 |
| 64                     | 4.2                    | 0.03 |
| 92                     | 5.4                    | 0.09 |
| 126                    | 7.4                    | 0.06 |
| 159                    | 9.8                    | 0.04 |
| 201                    | 16.2                   | 0.01 |
| 273                    | 34.0                   | 0.06 |

## 15 Migration and weight increase in 95% ethanol at 40 °C

Migration Kinetics - Results in  $\mu\text{g}/\text{dm}^2$ . Average values and standard deviation (N=3)

| Migration time [days] |         | Toluene | Chloro-benzene | Styrene | Phenyl-cyclo-hexane | Benzo-phenone | Methyl-stearate |
|-----------------------|---------|---------|----------------|---------|---------------------|---------------|-----------------|
| 1                     | average | 51.0    | 98.8           | 37.8    | 11.3                | 35.6          | 29.7            |
|                       | SD      | 1.9     | 24.0           | 3.6     | 8.2                 | 5.5           | 1.3             |
| 2                     | average | 78.6    | 211.2          | 66.0    | 19.6                | 39.0          | 34.5            |
|                       | SD      | 1.7     | 39.3           | 12.9    | 1.4                 | 2.7           | 0.9             |
| 3                     | average | 133.5   | 283.7          | 79.0    | 23.3                | 47.2          | 37.4            |
|                       | SD      | 6.2     | 10.5           | 14.2    | 0.8                 | 4.2           | 3.5             |
| 7                     | average | 236.6   | 390.2          | 123.4   | 30.9                | 64.8          | 42.3            |
|                       | SD      | 6.8     | 50.8           | 29.1    | 1.5                 | 4.5           | 2.0             |
| 14                    | average | 364.9   | 590.2          | 200.0   | 40.7                | 83.9          | 45.6            |
|                       | SD      | 11.8    | 49.4           | 27.4    | 1.5                 | 5.5           | 1.2             |
| 22                    | average | 445.9   | 916.0          | 301.9   | 55.6                | 106.7         | 57.8            |
|                       | SD      | 62.2    | 47.4           | 14.9    | 2.0                 | 2.1           | 4.6             |
| 29                    | average | 609.0   | 792.2          | 276.5   | 56.4                | 113.4         | 75.9            |
|                       | SD      | 11.0    | 10.3           | 19.0    | 1.3                 | 5.6           | 2.8             |
| 35                    | average | 707.0   | 913.9          | 330.2   | 67.6                | 131.2         | 88.5            |
|                       | SD      | 10.5    | 18.9           | 7.5     | 3.4                 | 3.7           | 4.7             |
| 43                    | average | 697.3   | 984.1          | 366.0   | 72.9                | 104.9         | 33.0            |
|                       | SD      | 19.0    | 14.4           | 8.3     | 2.7                 | 13.4          | 7.7             |
| 49                    | average | 764.8   | 1067.3         | 395.1   | 77.4                | 132.4         | 45.4            |
|                       | SD      | 19.4    | 14.4           | 6.8     | 2.3                 | 9.3           | 7.6             |
| 56                    | average | 811.3   | 1155.0         | 442.4   | 79.8                | 132.4         | 55.1            |
|                       | SD      | 31.5    | 57.0           | 18.3    | 3.3                 | 9.3           | 5.0             |
| 63                    | average | 871.3   | 992.7          | 447.8   | 83.2                | 142.7         | 48.7            |
|                       | SD      | 46.4    | 475.3          | 20.4    | 1.5                 | 10.6          | 1.7             |
| 70                    | average | 908.7   | 1188.3         | 483.1   | 76.1                | 150.6         | 40.0            |
|                       | SD      | 20.8    | 47.0           | 46.3    | 31.8                | 7.3           | 4.2             |
| 77                    | average | 990.4   | 1200.3         | 493.6   | 73.7                | 106.3         | 33.6            |
|                       | SD      | 78.0    | 20.5           | 33.1    | 37.6                | 78.7          | 10.1            |
| 84                    | average | 1095.2  | 1227.3         | 511.5   | 90.5                | 164.3         | 71.2            |
|                       | SD      | 70.5    | 34.0           | 42.3    | 3.5                 | 4.9           | 03.9            |
| 91                    | average | 1080.5  | 1269.4         | 505.9   | 100.4               | 141.0         | 60.7            |
|                       | SD      | 41.8    | 31.7           | 20.9    | 11.6                | 67.3          | 05.3            |
| 98                    | average | 995.1   | 1239.3         | 498.5   | 102.4               | 178.1         | 63.8            |
|                       | SD      | 70.4    | 34.2           | 11.6    | 7.4                 | 6.6           | 4.9             |
| 105                   | average | 991.2   | 1200.0         | 497.4   | 98.4                | 186.8         | 62.3            |
|                       | SD      | 103.4   | 76.3           | 30.9    | 13.8                | 14.3          | 5.1             |
| 115                   | average | 1168.5  | 1303.2         | 563.0   | 113.1               | 172.9         | 104.4           |
|                       | SD      | 27.7    | 20.5           | 17.6    | 10.4                | 82.5          | 6.2             |
| 133                   | average | 1160.4  | 1296.1         | 578.7   | 114.2               | 212.1         | 89.4            |
|                       | SD      | 41.8    | 17.3           | 18.6    | 10.1                | 13.9          | 10.1            |

|            |         |        |        |       |       |       |      |
|------------|---------|--------|--------|-------|-------|-------|------|
| <b>147</b> | average | 1164.2 | 1299.5 | 557.2 | 122.3 | 179.8 | 90.6 |
|            | SD      | 30.7   | 76.1   | 27.0  | 10.4  | 86.5  | 8.0  |
| <b>161</b> | average | 1156.3 | 1363.4 | 604.0 | 127.6 | 198.9 | 15.3 |
|            | SD      | 25.3   | 26.7   | 15.0  | 12.5  | 15.6  | 3.0  |
| <b>175</b> | average | 1203.7 | 1375.7 | 619.7 | 140.5 | 208.7 | 20.8 |
|            | SD      | 16.5   | 19.1   | 7.2   | 15.2  | 12.3  | 12.9 |
| <b>189</b> | average | 1217.2 | 1352.1 | 605.1 | 129.0 | 249.2 | 13.2 |
|            | SD      | 63.0   | 52.7   | 27.7  | 15.1  | 22.2  | 0.0  |
| <b>202</b> | average | 1264.2 | 1385.8 | 626.8 | 121.6 | 246.5 | 13.2 |
|            | SD      | 36.0   | 19.2   | 15.2  | 39.9  | 30.9  | 0.0  |

### Relative migration - Results in %. Average values

| <b>Migration<br/>time<br/>[days]</b> | <b>Toluene</b> | <b>Chloro-<br/>benzene</b> | <b>Styrene</b> | <b>Phenyl-<br/>cyclo-<br/>hexane</b> | <b>Benzo-<br/>phenone</b> | <b>Methyl-<br/>stearate</b> |
|--------------------------------------|----------------|----------------------------|----------------|--------------------------------------|---------------------------|-----------------------------|
| <b>1</b>                             | 3.4            | 6.1                        | 5.3            | 0.5                                  | 1.8                       | 1.3                         |
| <b>2</b>                             | 5.2            | 13.0                       | 9.2            | 0.8                                  | 2.0                       | 1.5                         |
| <b>3</b>                             | 8.8            | 17.4                       | 11.0           | 1.0                                  | 2.4                       | 1.6                         |
| <b>7</b>                             | 15.7           | 24.0                       | 17.2           | 1.3                                  | 3.3                       | 1.8                         |
| <b>14</b>                            | 24.2           | 36.3                       | 27.8           | 1.7                                  | 4.2                       | 2.0                         |
| <b>22</b>                            | 29.5           | 56.3                       | 42.0           | 2.3                                  | 5.4                       | 2.5                         |
| <b>29</b>                            | 40.1           | 49.5                       | 37.8           | 2.3                                  | 5.8                       | 3.3                         |
| <b>35</b>                            | 46.5           | 57.2                       | 45.2           | 2.7                                  | 6.7                       | 3.8                         |
| <b>43</b>                            | 45.9           | 61.6                       | 50.2           | 2.9                                  | 5.3                       | 1.4                         |
| <b>49</b>                            | 50.3           | 66.9                       | 54.3           | 3.1                                  | 6.8                       | 1.9                         |
| <b>56</b>                            | 53.3           | 72.4                       | 60.9           | 3.2                                  | 7.3                       | 2.4                         |
| <b>63</b>                            | 57.3           | 62.2                       | 61.6           | 3.4                                  | 7.6                       | 2.1                         |
| <b>70</b>                            | 59.7           | 74.5                       | 66.5           | 3.1                                  | 7.7                       | 1.7                         |
| <b>77</b>                            | 65.1           | 75.3                       | 68.0           | 3.6                                  | 8.2                       | 1.9                         |
| <b>84</b>                            | 71.9           | 77.0                       | 70.5           | 3.7                                  | 8.4                       | 3.0                         |
| <b>91</b>                            | 70.9           | 79.7                       | 69.7           | 4.1                                  | 8.8                       | 2.6                         |
| <b>98</b>                            | 65.4           | 77.8                       | 68.7           | 4.2                                  | 9.2                       | 2.7                         |
| <b>105</b>                           | 65.1           | 75.3                       | 68.5           | 4.0                                  | 9.6                       | 2.7                         |
| <b>115</b>                           | 76.7           | 81.8                       | 77.6           | 4.6                                  | 10.6                      | 4.5                         |
| <b>133</b>                           | 76.2           | 81.4                       | 79.8           | 4.7                                  | 10.9                      | 3.8                         |
| <b>147</b>                           | 76.4           | 81.6                       | 76.8           | 5.0                                  | 11.0                      | 3.9                         |
| <b>161</b>                           | 75.9           | 85.6                       | 83.3           | 5.2                                  | 10.3                      | 0.7                         |
| <b>175</b>                           | 79.0           | 86.4                       | 85.5           | 5.8                                  | 10.8                      | 0.9                         |
| <b>189</b>                           | 79.9           | 84.9                       | 83.5           | 5.3                                  | 12.9                      | 0.6                         |
| <b>202</b>                           | 83.0           | 87.1                       | 86.5           | 5.0                                  | 12.8                      | 0.6                         |

# Migration Kinetics - Results in $\mu\text{g}/\text{dm}^2$ . Average values

| Migration time [days] | Oligo-1 | Oligo-2 | Oligo-3 | Oligo-4 | Oligo-5 | Oligo-6 | Oligo-7 | Oligo-8 |
|-----------------------|---------|---------|---------|---------|---------|---------|---------|---------|
| 1                     | n.d.    | 18.6    | 23.7    | 24.4    | 53.4    | 15.3    | 05.9    | n.d.    |
| 2                     | n.d.    | 21.2    | 23.6    | 26.4    | 60.4    | 17.5    | 05.7    | 02.9    |
| 3                     | n.d.    | 24.3    | 24.6    | 20.3    | 65.2    | 20.4    | 06.8    | 01.6    |
| 7                     | n.d.    | 27.7    | 24.8    | 32.1    | 72.5    | 22.5    | 09.1    | n.d.    |
| 14                    | n.d.    | 32.1    | 25.3    | 35.1    | 79.0    | 24.0    | 07.6    | n.d.    |
| 22                    | n.d.    | 34.8    | 21.5    | 39.9    | 88.5    | 27.0    | 11.0    | n.d.    |
| 29                    | 06.0    | 39.0    | 61.3    | 38.5    | 88.0    | 27.2    | 04.0    | n.d.    |
| 35                    | 07.7    | 41.9    | 55.7    | 38.4    | 87.2    | 27.0    | 12.1    | 04.2    |
| 43                    | n.d.    | 42.0    | 52.7    | 38.7    | 85.7    | 16.7    | 13.8    | n.d.    |
| 49                    | 07.0    | 44.4    | 57.7    | 39.8    | 88.7    | 11.3    | 14.6    | 04.4    |
| 56                    | n.d.    | 45.0    | 28.5    | 39.9    | 91.1    | 27.4    | 13.5    | n.d.    |
| 63                    | n.d.    | 46.1    | 23.4    | 40.5    | 91.0    | 26.7    | 13.1    | 04.0    |
| 70                    | n.d.    | 46.9    | 28.5    | 41.7    | 93.9    | 28.5    | 14.5    | n.d.    |
| 77                    | n.d.    | 49.3    | 27.3    | 43.7    | 97.4    | 29.8    | 15.3    | n.d.    |
| 84                    | 06.8    | 52.9    | 26.6    | 43.3    | 96.8    | 29.0    | 12.6    | n.d.    |
| 91                    | n.d.    | 50.9    | 30.9    | 43.5    | 96.7    | 29.6    | 13.9    | n.d.    |
| 98                    | 06.3    | 54.9    | 28.6    | 48.6    | 108.0   | 33.1    | 12.0    | 04.7    |
| 105                   | n.d.    | 55.7    | 33.2    | 49.3    | 110.0   | 34.0    | 11.9    | 05.0    |
| 115                   | 08.9    | 58.8    | 34.9    | 48.2    | 108.8   | 33.3    | 12.6    | 05.2    |

# Relative migration - Results in %. Average values

| Migration time [days] | Oligo-1 | Oligo-2 | Oligo-3 | Oligo-4 | Oligo-5 | Oligo-6 | Oligo-7 | Oligo-8 |
|-----------------------|---------|---------|---------|---------|---------|---------|---------|---------|
| 1                     |         | 0.6     | 0.3     | 0.2     | 0.2     | 0.2     | 0.2     |         |
| 2                     |         | 0.7     | 0.3     | 0.2     | 0.2     | 0.2     | 0.2     | 0.3     |
| 3                     |         | 0.8     | 0.3     | 0.2     | 0.2     | 0.3     | 0.2     | 0.2     |
| 7                     |         | 0.9     | 0.3     | 0.2     | 0.3     | 0.3     | 0.3     |         |
| 14                    |         | 1.0     | 0.3     | 0.3     | 0.3     | 0.3     | 0.2     |         |
| 22                    |         | 1.1     | 0.3     | 0.3     | 0.3     | 0.4     | 0.3     |         |
| 29                    | 2.3     | 1.2     | 0.7     | 0.3     | 0.3     | 0.4     | 0.1     |         |
| 35                    |         | 1.3     | 0.7     | 0.3     | 0.3     | 0.4     | 0.4     | 0.4     |
| 43                    |         | 1.3     | 0.6     | 0.3     | 0.3     | 0.2     | 0.4     |         |
| 49                    | 2.6     | 1.4     | 0.7     | 0.3     | 0.3     | 0.2     | 0.5     | 0.5     |
| 56                    |         | 1.4     | 0.3     | 0.3     | 0.3     | 0.4     | 0.4     |         |
| 63                    |         | 1.4     | 0.3     | 0.3     | 0.3     | 0.4     | 0.4     | 0.4     |
| 70                    |         | 1.5     | 0.3     | 0.3     | 0.4     | 0.4     | 0.4     |         |
| 77                    |         | 1.5     | 0.3     | 0.3     | 0.4     | 0.4     | 0.5     |         |
| 84                    | 2.6     | 1.7     | 0.3     | 0.3     | 0.4     | 0.4     | 0.4     |         |
| 91                    |         | 1.6     | 0.4     | 0.3     | 0.4     | 0.4     | 0.4     |         |
| 98                    | 2.4     | 1.7     | 0.3     | 0.4     | 0.4     | 0.5     | 0.4     | 0.5     |

|     |     |     |     |     |     |     |     |
|-----|-----|-----|-----|-----|-----|-----|-----|
| 105 | 1.7 | 0.4 | 0.4 | 0.4 | 0.5 | 0.4 | 0.5 |
| 115 | 1.8 | 0.4 | 0.4 | 0.4 | 0.5 | 0.4 | 0.6 |

Weight increase - Results in %. Average values and standard deviation (N=3)

| Time contact<br>[days] | Weight increase<br>[%] | SD   |
|------------------------|------------------------|------|
| 0.17                   | 0.62                   | 0.07 |
| 0.33                   | 0.72                   | 0.09 |
| 1                      | 1.58                   | 0.05 |
| 2                      | 1.89                   | 0.06 |
| 5                      | 2.55                   | 0.49 |
| 12                     | 2.74                   | 0.40 |
| 16                     | 2.79                   | 0.13 |
| 30                     | 2.68                   | 0.25 |
| 44                     | 2.68                   | 0.16 |
| 64                     | 2.59                   | 0.13 |
| 92                     | 2.46                   | 0.42 |
| 126                    | 2.48                   | 0.30 |
| 159                    | 2.50                   | 0.12 |

## 16 Migration and weight increase in 95% ethanol at 20 °C

Migration Kinetics - Results in  $\mu\text{g}/\text{dm}^2$ . Average values and standard deviation (N=3)

| Migration time [days] |         | Toluene | Chloro-benzene | Styrene | Phenyl-cyclo-hexane | Benzo-phenone | Methyl-stearate |
|-----------------------|---------|---------|----------------|---------|---------------------|---------------|-----------------|
| 1                     | average | 25.8    | 30.4           | 17.3    | 3.5                 | 18.7          | 26.0            |
|                       | SD      | 0.9     | 2.2            | 1.2     | 0.4                 | 2.6           | 1.0             |
| 2                     | average | 23.2    | 46.8           | 19.4    | 5.1                 | 23.9          | 27.0            |
|                       | SD      | 1.9     | 4.8            | 1.2     | 85.0                | 4.2           | 0.9             |
| 3                     | average | 25.6    | 52.7           | 20.7    | 6.5                 | 25.8          | 28.3            |
|                       | SD      | 3.3     | 5.0            | 1.9     | 3.9                 | 2.5           | 2.1             |
| 7                     | average | 36.7    | 73.3           | 25.9    | 13.3                | 29.5          | 29.9            |
|                       | SD      | 0.6     | 1.3            | 1.5     | 0.5                 | 4.1           | 1.7             |
| 14                    | average | 53.6    | 106.9          | 37.3    | 16.3                | 32.6          | 27.4            |
|                       | SD      | 0.6     | 1.9            | 2.1     | 0.8                 | 4.9           | 0.7             |
| 22                    | average | 35.3    | 148.7          | 57.6    | 21.8                | 40.1          | 31.0            |
|                       | SD      | 2.6     | 23.3           | 11.5    | 1.5                 | 2.3           | 1.0             |
| 29                    | average | 80.6    | 223.6          | 56.7    | 26.4                | 37.6          | 37.4            |
|                       | SD      | 2.3     | 6.8            | 1.8     | 5.3                 | 1.4           | 1.9             |
| 35                    | average | 113.9   | 217.6          | 67.4    | 28.0                | 43.5          | 43.1            |
|                       | SD      | 13.4    | 22.2           | 1.9     | 2.2                 | 5.4           | 0.9             |
| 43                    | average | 101.4   | 222.8          | 76.8    | 34.6                | 32.2          |                 |
|                       | SD      | 3.6     | 4.8            | 2.0     | 14.6                | 6.1           |                 |
| 49                    | average | 117.8   | 253.4          | 87.4    | 32.2                | 36.1          |                 |
|                       | SD      | 4.6     | 4.9            | 1.6     | 1.8                 | 6.9           |                 |
| 56                    | average | 136.7   | 279.6          | 98.8    | 31.5                | 41.2          |                 |
|                       | SD      | 2.5     | 2.9            | 1.1     | 0.5                 | 4.5           |                 |
| 63                    | average | 166.4   | 300.3          | 106.8   | 32.6                | 42.3          |                 |
|                       | SD      | 28.8    | 5.8            | 1.4     | 0.8                 | 5.2           |                 |
| 70                    | average | 167.2   | 304.5          | 112.9   | 33.1                | 42.3          |                 |
|                       | SD      | 03.7    | 10.5           | 03.5    | 01.8                | 06.1          |                 |
| 77                    | average | 174.9   | 334.6          | 120.0   | 33.4                | 49.9          |                 |
|                       | SD      | 05.3    | 04.6           | 04.5    | 01.5                | 02.8          |                 |
| 84                    | average | 225.8   | 349.2          | 124.3   | 33.9                | 42.8          |                 |
|                       | SD      | 03.7    | 13.9           | 02.8    | 01.7                | 04.7          |                 |
| 91                    | average | 239.1   | 382.5          | 131.0   | 32.7                | 45.2          |                 |
|                       | SD      | 04.3    | 07.4           | 02.9    | 02.2                | 06.1          |                 |
| 98                    | average | 216.9   | 371.8          | 126.3   | 33.2                | 45.5          |                 |
|                       | SD      | 15.8    | 12.6           | 05.2    | 02.7                | 06.5          |                 |
| 105                   | average | 268.0   | 415.2          | 143.3   | 35.6                | 54.0          |                 |
|                       | SD      | 07.3    | 08.8           | 04.1    | 03.0                | 09.9          |                 |
| 115                   | average | 292.7   | 437.2          | 158.3   | 39.9                | 59.2          |                 |
|                       | SD      | 17.4    | 13.1           | 03.3    | 03.1                | 04.1          |                 |
| 133                   | average | 334.2   | 467.0          | 165.0   | 43.1                | 60.9          |                 |
|                       | SD      | 6.7     | 11.7           | 4.5     | 5.4                 | 6.9           |                 |

Relative migration - Results in %. Average values

| Migration<br>time<br>[days] | Toluene | Chloro-<br>benzene | Styrene | Phenyl-<br>cyclo-<br>hexane | Benzo-<br>phenone | Methyl-<br>stearate |
|-----------------------------|---------|--------------------|---------|-----------------------------|-------------------|---------------------|
| 1                           | 1.7     | 1.9                | 2.4     | 0.1                         | 0.9               | 1.1                 |
| 2                           | 1.5     | 2.9                | 2.7     | 0.2                         | 1.2               | 1.2                 |
| 3                           | 1.7     | 3.2                | 2.9     | 0.3                         | 1.3               | 1.2                 |
| 7                           | 2.4     | 4.5                | 3.6     | 0.5                         | 1.5               | 1.3                 |
| 14                          | 3.6     | 6.6                | 5.2     | 0.7                         | 1.6               | 1.2                 |
| 22                          | 2.3     | 9.1                | 8.0     | 0.9                         | 2.0               | 1.3                 |
| 29                          | 5.5     | 13.4               | 7.2     | 1.0                         | 1.9               | 1.6                 |
| 35                          | 7.8     | 13.0               | 8.7     | 1.0                         | 2.2               | 1.8                 |
| 43                          | 7.0     | 13.3               | 10.0    | 1.3                         | 1.6               |                     |
| 49                          | 8.1     | 15.2               | 11.5    | 1.2                         | 1.8               |                     |
| 56                          | 9.4     | 16.9               | 13.1    | 1.2                         | 2.1               |                     |
| 63                          | 11.5    | 18.2               | 14.2    | 1.2                         | 2.1               |                     |
| 70                          | 11.5    | 18.4               | 15.0    | 1.2                         | 2.1               |                     |
| 77                          | 12.1    | 20.3               | 16.0    | 1.3                         | 2.5               |                     |
| 84                          | 15.6    | 21.2               | 16.6    | 1.3                         | 2.2               |                     |
| 91                          | 16.5    | 23.3               | 17.5    | 1.2                         | 2.3               |                     |
| 98                          | 15.0    | 22.6               | 16.9    | 1.2                         | 2.3               |                     |
| 105                         | 18.5    | 25.3               | 19.2    | 1.4                         | 2.7               |                     |
| 115                         | 20.2    | 26.7               | 21.3    | 1.5                         | 3.0               |                     |
| 133                         | 23.1    | 28.5               | 22.2    | 1.7                         | 3.1               |                     |



## Migration Kinetics - Results in $\mu\text{g}/\text{dm}^2$ . Average values

| Migration time [days] | Oligo-1 | Oligo-2 | Oligo-3 | Oligo-4 | Oligo-5 | Oligo-6 | Oligo-7 | Oligo-8 |
|-----------------------|---------|---------|---------|---------|---------|---------|---------|---------|
| 1                     | n.d.    | 09.7    | 24.8    | 17.0    | 39.4    | 11.8    | 05.7    | n.d.    |
| 2                     | n.d.    | 11.6    | 20.7    | 19.8    | 44.2    | 12.7    | 05.2    | n.d.    |
| 3                     | n.d.    | 14.5    | 19.8    | 22.4    | 47.5    | 15.6    | 06.2    | n.d.    |
| 7                     | n.d.    | 17.1    | 17.9    | 23.9    | 52.5    | 16.2    | 06.4    | n.d.    |
| 14                    | n.d.    | 20.4    | 18.4    | 27.5    | 59.9    | 18.5    | 06.1    | n.d.    |
| 22                    | n.d.    | 21.5    | 16.5    | 31.4    | 67.5    | 20.2    | 08.1    | n.d.    |
| 29                    | 03.8    | 24.9    | 47.6    | 31.5    | 68.0    | 20.9    | 07.7    | n.d.    |
| 35                    | n.d.    | 26.2    | 45.5    | 33.7    | 60.4    | 30.9    | 11.2    | 02.1    |
| 43                    | n.d.    | 24.2    | 41.3    | 33.2    | 69.5    | 20.2    | 11.3    | n.d.    |
| 49                    | n.d.    | 25.2    | 47.2    | 27.8    | 64.3    | 29.4    | 11.9    | n.d.    |
| 56                    | n.d.    | 25.9    | 18.7    | 35.3    | 79.7    | 25.7    | 12.2    | 04.6    |
| 63                    | n.d.    | 27.4    | 21.1    | 23.6    | 62.0    | 22.6    | 10.9    | n.d.    |
| 70                    | n.d.    | 28.3    | 21.9    | 36.7    | 79.9    | 23.8    | 12.3    | n.d.    |
| 77                    | n.d.    | 27.7    | 21.7    | 36.7    | 79.8    | 24.5    | 12.1    | n.d.    |
| 84                    | n.d.    | 29.4    | 23.4    | 37.9    | 83.5    | 24.9    | 13.0    | n.d.    |
| 91                    | n.d.    | 30.4    | 23.6    | 26.8    | 86.0    | 25.9    | 12.0    | n.d.    |
| 98                    | n.d.    | 29.8    | 28.2    | 40.4    | 87.6    | 26.5    | 12.3    | n.d.    |
| 105                   | n.d.    | 30.9    | 31.1    | 42.8    | 93.7    | 29.9    | 10.0    | 03.9    |
| 115                   | n.d.    | 31.7    | 25.9    | 40.7    | 89.4    | 27.1    | 11.9    | 04.0    |
| 133                   |         |         | n.d.    | 41.5    | 100.1   | 29.2    | 11.4    | 10.8    |

## Relative migration - Results in %. Average values

| Migration time [days] | Oligo-1 | Oligo-2 | Oligo-3 | Oligo-4 | Oligo-5 | Oligo-6 | Oligo-7 | Oligo-8 |
|-----------------------|---------|---------|---------|---------|---------|---------|---------|---------|
| 1                     | n.d.    | 0.3     | 0.3     | 0.1     | 0.1     | 0.2     | 0.2     | n.d.    |
| 2                     | n.d.    | 0.4     | 0.2     | 0.1     | 0.2     | 0.2     | 0.2     | n.d.    |
| 3                     | n.d.    | 0.5     | 0.2     | 0.2     | 0.2     | 0.2     | 0.2     | n.d.    |
| 7                     | n.d.    | 0.5     | 0.2     | 0.2     | 0.2     | 0.2     | 0.2     | n.d.    |
| 14                    | n.d.    | 0.6     | 0.2     | 0.2     | 0.2     | 0.3     | 0.2     | n.d.    |
| 22                    | n.d.    | 0.7     | 0.2     | 0.2     | 0.3     | 0.3     | 0.3     | n.d.    |
| 29                    | 1.4     | 0.8     | 0.6     | 0.2     | 0.3     | 0.3     | 0.2     | n.d.    |
| 35                    | n.d.    | 0.8     | 0.5     | 0.3     | 0.2     | 0.4     | 0.3     | 0.2     |
| 43                    | n.d.    | 0.8     | 0.5     | 0.2     | 0.3     | 0.3     | 0.4     | n.d.    |
| 49                    | n.d.    | 0.8     | 0.6     | 0.2     | 0.2     | 0.4     | 0.4     | n.d.    |
| 56                    | n.d.    | 0.8     | 0.2     | 0.3     | 0.3     | 0.4     | 0.4     | 0.5     |
| 63                    | n.d.    | 0.9     | 0.2     | 0.2     | 0.2     | 0.3     | 0.3     | n.d.    |
| 70                    | n.d.    | 0.9     | 0.3     | 0.3     | 0.3     | 0.3     | 0.4     | n.d.    |
| 77                    | n.d.    | 0.9     | 0.3     | 0.3     | 0.3     | 0.3     | 0.4     | n.d.    |
| 84                    | n.d.    | 0.9     | 0.3     | 0.3     | 0.3     | 0.3     | 0.4     | n.d.    |
| 91                    | n.d.    | 1.0     | 0.3     | 0.2     | 0.3     | 0.4     | 0.4     | n.d.    |

|     |      |     |      |     |     |     |     |      |
|-----|------|-----|------|-----|-----|-----|-----|------|
| 98  | n.d. | 0.9 | 0.3  | 0.3 | 0.3 | 0.4 | 0.4 | n.d. |
| 105 | n.d. | 1.0 | 0.4  | 0.3 | 0.4 | 0.4 | 0.3 | 0.4  |
| 115 | n.d. | 1.0 | 0.3  | 0.3 | 0.3 | 0.4 | 0.4 | 0.4  |
| 133 |      | 1.7 | n.d. | 0.3 | 0.4 | 0.4 | 0.4 | 1.1  |

Weight increase - Results in %. Average values and standard deviation (N=3)

| Time contact<br>[days] | Weight increase<br>[%] | SD   |
|------------------------|------------------------|------|
| 2                      | 0.76                   | 0.01 |
| 5                      | 1.23                   | 0.21 |
| 12                     | 1.71                   | 0.21 |
| 16                     | 1.89                   | 0.02 |
| 30                     | 2.19                   | 0.21 |
| 44                     | 2.32                   | 0.21 |
| 64                     | 2.48                   | 0.02 |
| 92                     | 2.48                   | 0.06 |
| 126                    | 2.57                   | 1.03 |
| 159                    | 2.60                   | 1.87 |

## 17 Migration and weight increase in 50% ethanol at 60 °C

Migration Kinetics - Results in  $\mu\text{g}/\text{dm}^2$ . Average values and standard deviation (N=3)

| Migration time [days] |         | Toluene | Chloro-benzene | Styrene | Phenyl-cyclo-hexane | Benzo-phenone | Methyl-stearate |
|-----------------------|---------|---------|----------------|---------|---------------------|---------------|-----------------|
| 1                     | average | 43.9    | 41.4           | 20.2    | 10.6                | 16.2          | n.d.            |
|                       | SD      | 16.0    | 13.1           | 08.1    | 01.5                | 06.7          | n.d.            |
| 2                     | average | 72.7    | 57.1           | 30.3    | 11.6                | 16.2          | n.d.            |
|                       | SD      | 19.2    | 25.6           | 03.8    | 01.1                | 02.6          | n.d.            |
| 3                     | average | 91.4    | 86.4           | 34.8    | 12.1                | 19.7          | n.d.            |
|                       | SD      | 21.8    | 30.4           | 10.1    | 02.3                | 02.3          | n.d.            |
| 7                     | average | 57.8    | 122.9          | 49.3    | 12.5                | 21.7          | n.d.            |
|                       | SD      | 60.7    | 62.4           | 21.2    | 02.9                | 04.4          | n.d.            |
| 14                    | average | 201.3   | 212.5          | 64.4    | 15.2                | 25.8          | n.d.            |
|                       | SD      | 51.4    | 64.7           | 46.6    | 01.8                | 04.3          | n.d.            |
| 22                    | average | 302.3   | 240.4          | 90.6    | 15.4                | 31.2          | n.d.            |
|                       | SD      | 91.8    | 113.3          | 33.4    | 03.3                | 02.5          | n.d.            |
| 29                    | average | 161.4   | 184.9          | 79.5    | 15.6                | 34.4          | n.d.            |
|                       | SD      | 22.4    | 31.9           | 08.6    | 01.5                | 07.6          | n.d.            |
| 35                    | average | 276.1   | 296.7          | 116.9   | 18.1                | 34.3          | n.d.            |
|                       | SD      | n.d.    | n.d.           | 47.0    | 03.2                | 03.9          | n.d.            |
| 43                    | average | 457.0   | 436.7          | 167.4   | 21.9                | 17.3          | n.d.            |
|                       | SD      | n.d.    | n.d.           | 16.5    | 02.2                | 06.7          | n.d.            |
| 49                    | average | 321.1   | 302.3          | 122.1   | 17.3                | 8.8           | n.d.            |
|                       | SD      | n.d.    | n.d.           | 76.8    | 07.4                | 05.4          | n.d.            |
| 56                    | average | 450.8   | 431.9          | 185.8   | 23.9                | 27.5          | n.d.            |
|                       | SD      | n.d.    | n.d.           | 22.8    | 02.8                | 06.3          | n.d.            |
| 63                    | average | 301.1   | 377.4          | 153.7   | 20.7                | 24.3          | n.d.            |
|                       | SD      | n.d.    | n.d.           | 48.0    | 05.0                | 04.1          | n.d.            |
| 70                    | average | 339.8   | 323.6          | 132.5   | 21.4                | 43.8          | n.d.            |
|                       | SD      | n.d.    | n.d.           | 49.7    | 04.8                | 04.1          | n.d.            |
| 77                    | average | 202.5   | 263.9          | 123.5   | 21.0                | 44.2          | n.d.            |
|                       | SD      | n.d.    | n.d.           | 44.3    | 05.2                | 06.3          | n.d.            |
| 84                    | average | 230.0   | 215.9          | 106.1   | 21.2                | 45.5          | n.d.            |
|                       | SD      | n.d.    | n.d.           | 19.0    | 04.3                | 08.5          | n.d.            |
| 91                    | average | 266.2   | 206.1          | 109.7   | 21.9                | 55.0          | n.d.            |
|                       | SD      | n.d.    | n.d.           | 24.8    | 02.8                | 24.5          | n.d.            |
| 98                    | average | 288.6   | 139.9          | 87.7    | 15.2                | 52.3          | n.d.            |
|                       | SD      | n.d.    | n.d.           | 62.7    | 15.1                | 13.7          | n.d.            |
| 105                   | average | 161.4   | 121.7          | 86.9    | 20.8                | 58.9          | n.d.            |
|                       | SD      | n.d.    | n.d.           | 54.7    | 06.4                | 17.9          | n.d.            |
| 115                   | average | 271.2   | 285.9          | 167.8   | 36.1                | 77.4          | n.d.            |
|                       | SD      | n.d.    | n.d.           | 95.4    | 15.2                | 19.1          | n.d.            |

Note: Due to analytical interferences, migration of methyl stearate from HIPS in 50% ethanol at 60 °C can not be measured.

Relative migration - Results in %. Average values

| Migration time [days] | Toluene | Chloro-benzene | Styrene | Phenyl-cyclo-hexane | Benzo-phenone | Methyl-stearate |
|-----------------------|---------|----------------|---------|---------------------|---------------|-----------------|
| 1                     | 5.8     | 5.0            | 5.6     | 0.9                 | 1.6           |                 |
| 2                     | 9.5     | 6.9            | 8.4     | 0.9                 | 1.6           |                 |
| 3                     | 12.0    | 10.5           | 9.6     | 1.0                 | 2.0           |                 |
| 7                     | 7.6     | 15.0           | 13.6    | 1.0                 | 2.2           |                 |
| 14                    | 26.4    | 25.9           | 17.8    | 1.2                 | 2.6           |                 |
| 22                    | 39.6    | 29.3           | 25.0    | 1.2                 | 3.1           |                 |
| 29                    | 21.2    | 22.5           | 21.9    | 1.3                 | 3.4           |                 |
| 35                    | 36.2    | 36.1           | 32.2    | 1.5                 | 3.4           |                 |
| 43                    | 59.9    | 53.2           | 46.1    | 1.8                 | 1.7           |                 |
| 49                    | 42.1    | 36.8           | 33.7    | 1.4                 | 0.9           |                 |
| 56                    | 59.1    | 52.6           | 51.2    | 1.9                 | 2.7           |                 |
| 63                    | 39.5    | 46.0           | 42.4    | 1.7                 | 2.4           |                 |
| 70                    | 44.5    | 39.4           | 36.5    | 1.7                 | 4.4           |                 |
| 77                    | 26.5    | 32.1           | 34.0    | 1.7                 | 4.4           |                 |
| 84                    | 30.1    | 26.3           | 29.2    | 1.7                 | 4.5           |                 |
| 91                    | 34.9    | 25.1           | 30.2    | 1.8                 | 5.5           |                 |
| 98                    | 37.8    | 17.0           | 24.2    | 1.2                 | 5.2           |                 |
| 105                   | 21.2    | 14.8           | 24.0    | 1.7                 | 5.9           |                 |
| 115                   | 35.5    | 34.8           | 46.3    | 2.9                 | 7.7           |                 |

Migration Kinetics - Results in  $\mu\text{g}/\text{dm}^2$ . Average values

| Migration time [days] | Oligo-1 | Oligo-2 | Oligo-3 | Oligo-4 | Oligo-5 | Oligo-6 | Oligo-7 | Oligo-8 |
|-----------------------|---------|---------|---------|---------|---------|---------|---------|---------|
| 1                     | 16.6    | 12.3    | 21.5    | 45.3    | 12.8    | n.d.    | n.d.    | n.d.    |
| 2                     | 20.5    | 15.3    | 26.3    | 55.7    | 16.1    | 05.1    | n.d.    | n.d.    |
| 3                     | 21.3    | 15.8    | 23.3    | 53.8    | 25.8    | 06.1    | n.d.    | n.d.    |
| 7                     | 24.0    | 18.4    | 07.8    | 39.0    | 61.1    | 05.9    | n.d.    | n.d.    |
| 14                    | 22.4    | 15.9    | 29.4    | 62.2    | 18.4    | 05.3    | n.d.    | n.d.    |
| 22                    | 23.9    | 16.1    | 31.2    | 65.6    | 18.9    | 06.4    | n.d.    | n.d.    |
| 29                    | 25.4    | 52.2    | 35.0    | 74.6    | 21.7    | 06.4    | n.d.    | n.d.    |
| 35                    | 24.8    | 45.7    | 35.2    | 67.7    | 19.9    | 08.9    | n.d.    | 02.1    |
| 43                    | 21.9    | 30.2    | 29.5    | 60.5    | 16.8    | 06.2    | n.d.    | n.d.    |
| 49                    | 20.0    | 12.2    | 22.1    | 38.8    | 10.6    | 03.3    | n.d.    | n.d.    |
| 56                    | 26.6    | 19.2    | 31.8    | 67.7    | 19.7    | 08.4    | n.d.    | 04.6    |
| 63                    | 28.7    | 12.9    | 35.1    | 73.8    | 21.7    | 10.3    | n.d.    | n.d.    |
| 70                    | 32.6    | 20.7    | 40.6    | 85.4    | 25.1    | 11.0    | n.d.    | n.d.    |
| 77                    | 30.7    | 17.8    | 37.8    | 80.5    | 25.1    | 06.8    | n.d.    | n.d.    |
| 84                    | 33.8    | 24.7    | 45.3    | 96.0    | 27.5    | 13.4    | n.d.    | n.d.    |
| 91                    | 41.4    | 20.7    | 42.8    | 90.2    | 25.8    | 09.1    | n.d.    | n.d.    |

|     |      |      |      |       |      |      |      |      |
|-----|------|------|------|-------|------|------|------|------|
| 98  | 34.8 | 26.8 | 46.0 | 94.0  | 26.4 | 06.6 | n.d. | n.d. |
| 105 | 39.0 | 23.7 | 49.0 | 103.1 | 28.6 | 09.2 | n.d. | 03.9 |
| 115 | 42.2 | 28.9 | 51.7 | 108.8 | 30.7 | 13.0 | 06.7 | 04.0 |

Relative migration - Results in %. Average values

| Migration<br>time<br>[days] | Oligo-1 | Oligo-2 | Oligo-3 | Oligo-4 | Oligo-5 | Oligo-6 | Oligo-7 | Oligo-8 |
|-----------------------------|---------|---------|---------|---------|---------|---------|---------|---------|
| 1                           | 6.3     | 0.4     | 0.3     | 0.3     | 0.0     |         |         |         |
| 2                           | 7.7     | 0.5     | 0.3     | 0.4     | 0.1     | 0.1     |         |         |
| 3                           | 8.0     | 0.5     | 0.3     | 0.4     | 0.1     | 0.1     |         |         |
| 7                           | 9.0     | 0.6     | 0.1     | 0.3     | 0.2     | 0.1     |         |         |
| 14                          | 8.4     | 0.5     | 0.3     | 0.5     | 0.1     | 0.1     |         |         |
| 22                          | 9.0     | 0.5     | 0.4     | 0.5     | 0.1     | 0.1     |         |         |
| 29                          | 9.6     | 1.6     | 0.4     | 0.6     | 0.1     | 0.1     |         |         |
| 35                          | 9.3     | 1.4     | 0.4     | 0.5     | 0.1     | 0.1     |         |         |
| 43                          | 8.3     | 0.9     | 0.3     | 0.5     | 0.1     | 0.1     |         |         |
| 49                          | 7.5     | 0.4     | 0.3     | 0.3     | 0.0     | 0.0     |         |         |
| 56                          | 10.0    | 0.6     | 0.4     | 0.5     | 0.1     | 0.1     |         |         |
| 63                          | 10.8    | 0.4     | 0.4     | 0.6     | 0.1     | 0.1     |         |         |
| 70                          | 12.3    | 0.7     | 0.5     | 0.6     | 0.1     | 0.2     |         |         |
| 77                          | 11.6    | 0.6     | 0.4     | 0.6     | 0.1     | 0.1     |         |         |
| 84                          | 12.7    | 0.8     | 0.5     | 0.7     | 0.1     | 0.2     |         |         |
| 91                          | 15.6    | 0.6     | 0.5     | 0.7     | 0.1     | 0.1     |         |         |
| 98                          | 13.1    | 0.8     | 0.5     | 0.7     | 0.1     | 0.1     |         |         |
| 105                         | 14.7    | 0.7     | 0.6     | 0.8     | 0.1     | 0.1     |         |         |
| 115                         | 15.9    | 0.9     | 0.6     | 0.8     | 0.1     | 0.2     |         |         |

Weight increase - Results in %. Average values and standard deviation (N=3)

| Time contact<br>[days] | Weight increase<br>[%] | SD   |
|------------------------|------------------------|------|
| 0.2                    | 0.8                    | 0.01 |
| 0.3                    | 1.0                    | 0.08 |
| 1                      | 1.4                    | 0.09 |
| 2                      | 1.5                    | 0.02 |
| 5                      | 1.4                    | 0.19 |
| 12                     | 1.3                    | 0.19 |
| 16                     | 1.3                    | 0.02 |
| 30                     | 1.3                    | 0.05 |
| 44                     | 1.4                    | 0.04 |
| 64                     | 1.7                    | 0.01 |
| 92                     | 2.7                    | 0.00 |
| 126                    | 7.3                    | 0.03 |
| 159                    | 8.5                    | 0.03 |
| 201                    | 9.7                    | 0.02 |
| 273                    | 10.0                   | 0.05 |

## 18 Migration and weight increase in 50% ethanol at 40 °C

Migration Kinetics - Results in  $\mu\text{g}/\text{dm}^2$ . Average values and standard deviation (N=3)

| Migration time [days] |         | Toluene | Chloro-benzene | Styrene | Phenyl-cyclo-hexane | Benzo-phenone | Methyl-stearate |
|-----------------------|---------|---------|----------------|---------|---------------------|---------------|-----------------|
| 1                     | average | 43.0    | 42.0           | 16.0    | 13.0                | 17.0          | n.d.            |
|                       | SD      | 03.5    | 03.3           | 01.6    | 00.7                | 03.7          | n.d.            |
| 3                     | average | 59.0    | 66.0           | 24.0    | 14.0                | 23.0          | n.d.            |
|                       | SD      | 09.3    | 05.2           | 01.4    | 05.8                | 03.2          | n.d.            |
| 7                     | average | 92.0    | 121.0          | 39.0    | 21.0                | 28.0          | n.d.            |
|                       | SD      | 04.2    | 15.6           | 04.8    | 01.2                | 01.6          | n.d.            |
| 16                    | average | 156.0   | 190.0          | 60.0    | 23.0                | 31.0          | n.d.            |
|                       | SD      | 09.7    | 12.7           | 03.8    | 01.2                | 02.7          | n.d.            |
| 36                    | average | 213.0   | 269.0          | 84.0    | 26.0                | 39.0          | n.d.            |
|                       | SD      | 23.8    | 31.2           | 09.3    | 02.6                | 04.8          | n.d.            |
| 49                    | average | 260.0   | 339.0          | 105.0   | 27.0                | 40.0          | n.d.            |
|                       | SD      | 35.6    | 39.8           | 11.6    | 02.1                | 01.6          | n.d.            |
| 64                    | average | 309.0   | 404.0          | 127.0   | 30.0                | 41.0          | n.d.            |
|                       | SD      | 32.4    | 41.7           | 10.1    | 04.4                | 05.7          | n.d.            |

Note: Due to analytical interferences, migration of methylstearate from HIPS in 50% ethanol at 40 °C can not be measured.

Relative migration - Results in %. Average values

| Migration time [days] | Toluene | Chloro-benzene | Styrene | Phenyl-cyclo-hexane | Benzo-phenone | Methyl-stearate |
|-----------------------|---------|----------------|---------|---------------------|---------------|-----------------|
| 1                     | 2.8     | 2.6            | 2.2     | 0.5                 | 0.9           |                 |
| 3                     | 3.9     | 4.1            | 3.3     | 0.6                 | 1.2           |                 |
| 7                     | 6.1     | 7.4            | 5.4     | 0.9                 | 1.4           |                 |
| 16                    | 10.3    | 11.7           | 8.4     | 0.9                 | 1.6           |                 |
| 36                    | 14.1    | 16.5           | 11.7    | 1.1                 | 2.0           |                 |
| 49                    | 17.2    | 20.8           | 14.6    | 1.1                 | 2.0           |                 |
| 64                    | 20.5    | 24.8           | 17.7    | 1.2                 | 2.1           |                 |

### Migration Kinetics - Results in $\mu\text{g}/\text{dm}^2$ . Average values

| Migration time [days] | Oligo-1 | Oligo-2 | Oligo-3 | Oligo-4 | Oligo-5 | Oligo-6 | Oligo-7 | Oligo-8 |
|-----------------------|---------|---------|---------|---------|---------|---------|---------|---------|
| 1                     | n.d.    | 10.07   | 7.45    | 12.82   | 29.26   | 13.59   | 3.54    | n.d.    |
| 3                     | n.d.    | 12.86   | 9.39    | 19.48   | 39.76   | 11.70   | 4.16    | n.d.    |
| 7                     | n.d.    | 15.39   | 9.90    | 21.27   | 43.39   | 13.26   | 3.90    | n.d.    |
| 16                    | n.d.    | 17.19   | 11.13   | 23.20   | 47.89   | 14.23   | 3.78    | n.d.    |
| 36                    | n.d.    | 19.28   | 11.83   | 21.72   | 46.43   | 20.90   | 4.68    | n.d.    |
| 49                    | n.d.    | 20.21   | 12.56   | 26.07   | 53.64   | 15.14   | 5.02    | n.d.    |
| 64                    | n.d.    | 17.78   | 14.19   | 26.80   | 54.65   | 17.87   | 5.26    | n.d.    |

### Relative migration - Results in %. Average values

| Migration time [days] | Oligo-1 | Oligo-2 | Oligo-3 | Oligo-4 | Oligo-5 | Oligo-6 | Oligo-7 | Oligo-8 |
|-----------------------|---------|---------|---------|---------|---------|---------|---------|---------|
| 1                     | n.d.    | 0.3     | 0.1     | 0.1     | 0.1     | 0.2     | 0.1     | n.d.    |
| 3                     | n.d.    | 0.4     | 0.1     | 0.1     | 0.1     | 0.2     | 0.1     | n.d.    |
| 7                     | n.d.    | 0.5     | 0.1     | 0.2     | 0.2     | 0.2     | 0.1     | n.d.    |
| 16                    | n.d.    | 0.5     | 0.1     | 0.2     | 0.2     | 0.2     | 0.1     | n.d.    |
| 36                    | n.d.    | 0.6     | 0.1     | 0.2     | 0.2     | 0.3     | 0.1     | n.d.    |
| 49                    | n.d.    | 0.6     | 0.1     | 0.2     | 0.2     | 0.2     | 0.2     | n.d.    |
| 64                    | n.d.    | 0.6     | 0.2     | 0.2     | 0.2     | 0.2     | 0.2     | n.d.    |

### Weight increase - Results in %. Average values and standard deviation (N=3)

| Time contact [days] | Weight increase [%] | SD   |
|---------------------|---------------------|------|
| 1                   | 0.9                 | 0.02 |
| 2                   | 1.0                 | 0.09 |
| 5                   | 1.3                 | 0.08 |
| 12                  | 1.3                 | 0.03 |
| 16                  | 1.3                 | 0.12 |
| 30                  | 1.3                 | 0.11 |
| 44                  | 1.3                 | 0.01 |
| 64                  | 1.3                 | 0.04 |
| 92                  | 1.3                 | 0.03 |
| 126                 | 1.3                 | 0.02 |
| 159                 | 1.3                 | 0.04 |



## 19 Migration and weight increase in 50% ethanol at 20 °C

Migration Kinetics - Results in  $\mu\text{g}/\text{dm}^2$ . Average values and standard deviation (N=3)

| Migration time [days] |         | Toluene | Chloro-benzene | Styrene | Phenyl-cyclo-hexane | Benzo-phenone | Methyl-stearate |
|-----------------------|---------|---------|----------------|---------|---------------------|---------------|-----------------|
| 1                     | average | 19      | 12             | 2       | 5                   | 6             | n.d.            |
|                       | SD      | 10.9    | 05.5           | 00.0    | 00.6                | 00.0          | n.d.            |
| 3                     | average | 21      | 20             | 11      | 7                   | 6             | n.d.            |
|                       | SD      | 13.9    | 04.3           | 01.3    | 00.8                | 00.0          | n.d.            |
| 7                     | average | 30      | 41             | 15      | 11                  | 13            | n.d.            |
|                       | SD      | 16.6    | 09.4           | 02.2    | 02.4                | 03.1          | n.d.            |
| 16                    | average | 25      | 48             | 17      | 13                  | 17            | n.d.            |
|                       | SD      | 16.4    | 11.2           | 03.8    | 01.5                | 03.1          | n.d.            |
| 36                    | average | 68      | 84             | 28      | 17                  | 21            | n.d.            |
|                       | SD      | 14.6    | 15.8           | 03.0    | 01.1                | 02.8          | n.d.            |
| 49                    | average | 59      | 84             | 26      | 16                  | 21            | n.d.            |
|                       | SD      | 22.7    | 18.9           | 04.7    | 02.3                | 03.2          | n.d.            |
| 64                    | average | 89      | 125            | 33      | 18                  | 24            | n.d.            |
|                       | SD      | 69.9    | 47.0           | 59.9    | 02.8                | 03.1          | n.d.            |

Note: Due to analytical interferences, migration of methyl stearate from HIPS in 50% ethanol at 20 °C can not be measured.

Relative migration - Results in %. Average values

| Migration time [days] | Toluene | Chloro-benzene | Styrene | Phenyl-cyclo-hexane | Benzo-phenone | Methyl-stearate |
|-----------------------|---------|----------------|---------|---------------------|---------------|-----------------|
| 1                     | 1.3     | 0.7            | 0.3     | 0.2                 | 0.3           |                 |
| 3                     | 1.4     | 1.2            | 1.5     | 0.3                 | 0.3           |                 |
| 7                     | 2.0     | 2.5            | 2.1     | 0.5                 | 0.7           |                 |
| 16                    | 1.7     | 3.0            | 2.4     | 0.5                 | 0.9           |                 |
| 36                    | 4.5     | 5.2            | 3.9     | 0.7                 | 1.1           |                 |
| 49                    | 3.9     | 5.2            | 3.6     | 0.7                 | 1.1           |                 |
| 64                    | 5.9     | 7.7            | 4.6     | 0.8                 | 1.2           |                 |

### Migration Kinetics - Results in $\mu\text{g}/\text{dm}^2$ . Average values

| Migration time [days] | Oligo-1 | Oligo-2 | Oligo-3 | Oligo-4 | Oligo-5 | Oligo-6 | Oligo-7 | Oligo-8 |
|-----------------------|---------|---------|---------|---------|---------|---------|---------|---------|
| 1                     | n.d.    | 02.2    | n.d.    | 06.6    | 14.0    | 07.0    | n.d.    | n.d.    |
| 3                     | n.d.    | 03.2    | 11.7    | 11.2    | 23.2    | 10.8    | n.d.    | n.d.    |
| 7                     | n.d.    | 07.2    | 06.1    | 14.1    | 28.1    | 08.2    | n.d.    | n.d.    |
| 16                    | n.d.    | 08.5    | 06.3    | 13.8    | 30.6    | 13.6    | 02.9    | n.d.    |
| 36                    | n.d.    | 06.7    | 06.9    | 12.0    | 27.8    | 16.6    | 02.8    | n.d.    |
| 49                    | n.d.    | 10.6    | 08.0    | 13.7    | 31.0    | 19.4    | 03.3    | n.d.    |
| 64                    | n.d.    | 11.8    | 07.7    | 18.1    | 35.4    | 09.5    | 03.6    | n.d.    |

### Relative migration - Results in %. Average values

| Migration time [days] | Oligo-1 | Oligo-2 | Oligo-3 | Oligo-4 | Oligo-5 | Oligo-6 | Oligo-7 | Oligo-8 |
|-----------------------|---------|---------|---------|---------|---------|---------|---------|---------|
| 1                     | n.d.    | 0.1     | n.d.    | 0.0     | 0.1     | 0.1     | n.d.    | n.d.    |
| 3                     | n.d.    | 0.1     | 0.1     | 0.1     | 0.1     | 0.1     | n.d.    | n.d.    |
| 7                     | n.d.    | 0.2     | 0.1     | 0.1     | 0.1     | 0.1     | n.d.    | n.d.    |
| 16                    | n.d.    | 0.3     | 0.1     | 0.1     | 0.1     | 0.2     | 0.1     | n.d.    |
| 36                    | n.d.    | 0.2     | 0.1     | 0.1     | 0.1     | 0.2     | 0.1     | n.d.    |
| 49                    | n.d.    | 0.3     | 0.1     | 0.1     | 0.1     | 0.3     | 0.1     | n.d.    |
| 64                    | n.d.    | 0.4     | 0.1     | 0.1     | 0.1     | 0.1     | 0.1     | n.d.    |

### Weight increase - Results in %. Average values and standard deviation (N=3)

| Time contact [days] | Weight increase [%] | SD   |
|---------------------|---------------------|------|
| 2                   | 0.5                 | 0.03 |
| 5                   | 0.7                 | 0.14 |
| 12                  | 0.9                 | 0.12 |
| 16                  | 1.0                 | 0.03 |
| 30                  | 1.1                 | 0.13 |
| 44                  | 1.1                 | 0.11 |
| 64                  | 1.2                 | 0.04 |
| 92                  | 1.2                 | 0.06 |
| 126                 | 1.2                 | 0.05 |
| 159                 | 1.4                 | 0.04 |
| 201                 | 1.2                 | 0.08 |
| 273                 | 1.3                 | 0.06 |

## 20 Weight increase in 20% ethanol at 60. 40 and 20 °C

Weight increase at 60 °C - Results in %. Average values and standard deviation (N=3)

| Time contact<br>[days] | Weight increase<br>[%] | SD    |
|------------------------|------------------------|-------|
| 2                      | 0.7                    | 0.004 |
| 5                      | 0.7                    | 0.003 |
| 12                     | 0.7                    | 0.003 |
| 16                     | 0.7                    | 0.001 |
| 30                     | 0.7                    | 0.010 |
| 44                     | 0.8                    | 0.009 |
| 64                     | 0.8                    | 0.007 |
| 92                     | 0.9                    | 0.005 |
| 126                    | 1.6                    | 0.004 |
| 159                    | 2.6                    | 0.011 |
| 201                    | 3.8                    | 0.014 |
| 273                    | 5.2                    | 0.015 |

Weight increase at 40 °C - Results in %. Average values and standard deviation (N=3)

| Time contact<br>[days] | Weight increase<br>[%] | SD    |
|------------------------|------------------------|-------|
| 2                      | 0.5                    | 0.022 |
| 5                      | 0.6                    | 0.056 |
| 12                     | 0.6                    | 0.053 |
| 16                     | 0.6                    | 0.007 |
| 30                     | 0.6                    | 0.007 |
| 44                     | 0.6                    | 0.009 |
| 64                     | 0.6                    | 0.011 |
| 92                     | 0.6                    | 0.020 |
| 126                    | 0.6                    | 0.023 |
| 159                    | 0.6                    | 0.023 |

Weight increase at 20 °C - Results in %. Average values and standard deviation (N=3)

| Time contact<br>[days] | Weight increase<br>[%] | SD    |
|------------------------|------------------------|-------|
| 2                      | 0.2                    | 0.009 |
| 5                      | 0.4                    | 0.071 |
| 12                     | 0.4                    | 0.060 |
| 16                     | 0.4                    | 0.026 |
| 30                     | 0.5                    | 0.037 |
| 44                     | 0.5                    | 0.046 |
| 64                     | 0.5                    | 0.014 |

|     |     |       |
|-----|-----|-------|
| 92  | 0.5 | 0.020 |
| 126 | 0.5 | 0.021 |
| 159 | 0.5 | 0.007 |

## 21 Weight increase in 10% ethanol at 60. 40 and 20 °C

Weight increase at 60 °C - Results in %. Average values and standard deviation (N=3)

| Time contact<br>[days] | Weight increase<br>[%] | SD   |
|------------------------|------------------------|------|
| 2                      | 0.4                    | 0.01 |
| 5                      | 0.4                    | 0.02 |
| 12                     | 0.4                    | 0.02 |
| 16                     | 0.4                    | 0.02 |
| 30                     | 0.4                    | 0.01 |
| 44                     | 0.5                    | 0.01 |
| 64                     | 0.5                    | 0.00 |
| 92                     | 0.7                    | 0.01 |
| 126                    | 1.1                    | 0.02 |
| 159                    | 1.7                    | 0.01 |
| 201                    | 2.3                    | 0.01 |
| 273                    | 3.3                    | 0.00 |

Weight increase at 40 °C - Results in %. Average values and standard deviation (N=3)

| Time contact<br>[days] | Weight increase<br>[%] | SD    |
|------------------------|------------------------|-------|
| 2                      | 0.2                    | 0.010 |
| 5                      | 0.3                    | 0.047 |
| 12                     | 0.3                    | 0.048 |
| 16                     | 0.3                    | 0.006 |
| 30                     | 0.3                    | 0.005 |
| 44                     | 0.3                    | 0.004 |
| 64                     | 0.3                    | 0.008 |
| 92                     | 0.3                    | 0.011 |
| 126                    | 0.3                    | 0.015 |
| 159                    | 0.3                    | 0.004 |

Weight increase at 20 °C - Results in %. Average values and standard deviation (N=3)

| Time contact<br>[days] | Weight increase<br>[%] | SD    |
|------------------------|------------------------|-------|
| 2                      | 0.1                    | 0.005 |
| 5                      | 0.2                    | 0.028 |
| 12                     | 0.2                    | 0.027 |
| 16                     | 0.2                    | 0.005 |
| 30                     | 0.2                    | 0.022 |
| 44                     | 0.3                    | 0.018 |
| 64                     | 0.3                    | 0.003 |
| 92                     | 0.2                    | 0.006 |
| 126                    | 0.3                    | 0.006 |
| 159                    | 0.3                    | 0.010 |

## 22 Weight increase in 3% acetic acid at 60. 40 and 20 °C

Weight increase at 60°C - Results in %. Average values and standard deviation (N=3)

| Time contact<br>[days] | Weight increase<br>[%] | SD    |
|------------------------|------------------------|-------|
| 2                      | 0.3                    | 0.010 |
| 5                      | 0.4                    | 0.129 |
| 12                     | 0.4                    | 0.114 |
| 16                     | 0.6                    | 0.081 |
| 30                     | 0.6                    | 0.037 |
| 44                     | 0.7                    | 0.036 |
| 64                     | 0.8                    | 0.019 |
| 92                     | 0.9                    | 0.042 |
| 126                    | 0.9                    | 0.116 |
| 159                    | 1.1                    | 0.085 |
| 201                    | 1.1                    | 0.072 |
| 273                    | 1.2                    | 0.051 |

Weight increase at 40 °C - Results in %. Average values and standard deviation (N=3)

| Time contact<br>[days] | Weight increase<br>[%] | SD    |
|------------------------|------------------------|-------|
| 2                      | 0.1                    | 0.028 |
| 5                      | 0.2                    | 0.030 |
| 12                     | 0.2                    | 0.029 |

|     |     |       |
|-----|-----|-------|
| 16  | 0.3 | 0.002 |
| 30  | 0.3 | 0.010 |
| 44  | 0.3 | 0.015 |
| 64  | 0.3 | 0.015 |
| 92  | 0.3 | 0.022 |
| 126 | 0.3 | 0.028 |
| 159 | 0.4 | 0.005 |
| 201 | 0.4 | 0.013 |
| 273 | 0.6 | 0.013 |

Weight increase at 20 °C- Results in %. Average values and standard deviation (N=3)

| Time contact<br>[days] | Weight increase<br>[%] | SD    |
|------------------------|------------------------|-------|
| 2                      | 0.1                    | 0.003 |
| 5                      | 0.1                    | 0.012 |
| 12                     | 0.2                    | 0.010 |
| 16                     | 0.2                    | 0.010 |
| 30                     | 0.2                    | 0.021 |
| 44                     | 0.2                    | 0.014 |
| 64                     | 0.2                    | 0.006 |
| 92                     | 0.2                    | 0.005 |
| 126                    | 0.2                    | 0.003 |
| 159                    | 0.3                    | 0.015 |
